# Supplementary material
Source: publisher figshare collection journal article supplement (https://gsajournals.figshare.com/ndownloader/files/15132551)
Supplement: Supplementary file 1 [file 15132551]

## Sheet: Plan1
Full proteomics data set for all 3852 evaluated proteins
N	gene_name	av.top3	signal_sum_D10_rep1_126	signal_sum_D10_rep2_126	signal_sum_D10_rep3_126	signal_sum_D115_rep1_129L	signal_sum_D115_rep2_129L	signal_sum_D115_rep3_129L	signal_sum_D235_rep1_130H	signal_sum_D235_rep2_130H	signal_sum_D235_rep3_130H	signal_sum_D25_rep1_127L	signal_sum_D25_rep2_127L	signal_sum_D25_rep3_127L	signal_sum_D55_rep1_128H	signal_sum_D55_rep2_128H	signal_sum_D55_rep3_128H	signal_sum_DD_rep1_131L	signal_sum_DD_rep2_131L	signal_sum_DD_rep3_131L	found.in.samples	max.qupm	batchcleaned_signal_sum_D10_rep1_126	batchcleaned_signal_sum_D10_rep2_126	batchcleaned_signal_sum_D10_rep3_126	batchcleaned_signal_sum_D115_rep1_129L	batchcleaned_signal_sum_D115_rep2_129L	batchcleaned_signal_sum_D115_rep3_129L	batchcleaned_signal_sum_D235_rep1_130H	batchcleaned_signal_sum_D235_rep2_130H	batchcleaned_signal_sum_D235_rep3_130H	batchcleaned_signal_sum_D25_rep1_127L	batchcleaned_signal_sum_D25_rep2_127L	batchcleaned_signal_sum_D25_rep3_127L	batchcleaned_signal_sum_D55_rep1_128H	batchcleaned_signal_sum_D55_rep2_128H	batchcleaned_signal_sum_D55_rep3_128H	batchcleaned_signal_sum_DD_rep1_131L	batchcleaned_signal_sum_DD_rep2_131L	batchcleaned_signal_sum_DD_rep3_131L	norm_signal_sum_D10_rep1_126	norm_signal_sum_D10_rep2_126	norm_signal_sum_D10_rep3_126	norm_signal_sum_D115_rep1_129L	norm_signal_sum_D115_rep2_129L	norm_signal_sum_D115_rep3_129L	norm_signal_sum_D235_rep1_130H	norm_signal_sum_D235_rep2_130H	norm_signal_sum_D235_rep3_130H
1	MAC_00003	6.76288	46142600	NA	21043600	51414600	NA	16898700	79525300	NA	25305800	58427400	NA	19297000	64557200	NA	15449600	46376100	NA	16516500	2	3	2.65929e+07	NA	3.65137e+07	2.96313e+07	NA	2.93217e+07	4.58321e+07	NA	4.39092e+07	3.36729e+07	NA	3.34831e+07	3.72056e+07	NA	2.68073e+07	2.67275e+07	NA	2.86585e+07	3.08915e+07	NA	3.1167e+07	3.15397e+07	NA	3.07295e+07	3.67925e+07	NA	4.25945e+07
2	MAC_00005	6.64873	13786700	27666700	5607070	14303300	31694000	4062530	19694600	58768300	4173450	15979500	31843800	4917590	17780700	22242200	3999230	12967300	25933900	4656090	3	3	1.15331e+07	1.15085e+07	1.61136e+07	1.19652e+07	1.31837e+07	1.16749e+07	1.64752e+07	2.44458e+07	1.19936e+07	1.33674e+07	1.3246e+07	1.41321e+07	1.48742e+07	9.25205e+06	1.1493e+07	1.08476e+07	1.07877e+07	1.33806e+07	1.33973e+07	1.2195e+07	1.3754e+07	1.27358e+07	1.33117e+07	1.22354e+07	1.32258e+07	1.36573e+07	1.16345e+07
3	MAC_00006	7.25679	41873600	73398900	62299000	39232800	57849600	52248900	54263900	106138000	53955400	46494900	46674600	62983800	49914700	40139000	47312000	37575700	51758700	48198700	3	4	4.92037e+07	6.46803e+07	6.01646e+07	4.61006e+07	5.0978e+07	5.04588e+07	6.3763e+07	9.35306e+07	5.21068e+07	5.4634e+07	4.11304e+07	6.08259e+07	5.86524e+07	3.53712e+07	4.5691e+07	4.41535e+07	4.56106e+07	4.65474e+07	5.71571e+07	6.8539e+07	5.13546e+07	4.90697e+07	5.14729e+07	5.28814e+07	5.11869e+07	5.22534e+07	5.05466e+07
4	MAC_00007	7.20975	54869700	129331000	84901700	50950300	128254000	65532300	72877800	232127000	72783600	60906400	115229000	93167400	68184600	102913000	62120000	53140600	109753000	61132600	3	5	7.60366e+07	8.16977e+07	9.69883e+07	7.06052e+07	8.10174e+07	7.48614e+07	1.00992e+08	1.46633e+08	8.3145e+07	8.4402e+07	7.27895e+07	1.06431e+08	9.44879e+07	6.50096e+07	7.09634e+07	7.36405e+07	6.93304e+07	6.98354e+07	8.83273e+07	8.65716e+07	8.27862e+07	7.51525e+07	8.18038e+07	7.84557e+07	8.10728e+07	8.19207e+07	8.06555e+07
5	MAC_00008	7.97866	416320000	592980000	593040000	438147000	602521000	458301000	557714000	992590000	488850000	515224000	541087000	572115000	561742000	464045000	432253000	370440000	502844000	459137000	3	22	4.58487e+08	5.16081e+08	6.18737e+08	4.82525e+08	5.24385e+08	4.7816e+08	6.14202e+08	8.63868e+08	5.10033e+08	5.67409e+08	4.70917e+08	5.96906e+08	6.18638e+08	4.03866e+08	4.50983e+08	4.0796e+08	4.37634e+08	4.79032e+08	5.32598e+08	5.46869e+08	5.28135e+08	5.13601e+08	5.29475e+08	5.01118e+08	4.93062e+08	4.82623e+08	4.94761e+08
6	MAC_00009	7.49067	185317000	236218000	293307000	214353000	262259000	281299000	299230000	464688000	309921000	242743000	233612000	319827000	244741000	197879000	219116000	184770000	217150000	251360000	3	23	2.07488e+08	2.31653e+08	2.67128e+08	2.39998e+08	2.57191e+08	2.56192e+08	3.3503e+08	4.55707e+08	2.82259e+08	2.71785e+08	2.29097e+08	2.91281e+08	2.74022e+08	1.94055e+08	1.99559e+08	2.06876e+08	2.12953e+08	2.28925e+08	2.41027e+08	2.45473e+08	2.28012e+08	2.55455e+08	2.59687e+08	2.68492e+08	2.68951e+08	2.54593e+08	2.73808e+08
7	MAC_00017	7.23449	63445300	53503300	53171100	71787700	51063700	34736600	93227500	106780000	37539600	78879700	44983500	47278400	76348800	42065700	36896700	56910600	53873900	33871600	3	6	4.76374e+07	5.23437e+07	7.23841e+07	5.39012e+07	4.9957e+07	4.72884e+07	6.99991e+07	1.04466e+08	5.11043e+07	5.92262e+07	4.40085e+07	6.43621e+07	5.73259e+07	4.1154e+07	5.02291e+07	4.27309e+07	5.27063e+07	4.61109e+07	5.53376e+07	5.54664e+07	6.17849e+07	5.73726e+07	5.04419e+07	4.95589e+07	5.6193e+07	5.83626e+07	4.95741e+07
8	MAC_00018	6.2952	11503900	9892930	13674000	14486600	10776000	11315400	20453900	21313600	12129200	15674100	9445650	15074600	16665300	8311030	9899870	11699800	8887900	10009800	3	3	9.63276e+06	1.13371e+07	1.42499e+07	1.21303e+07	1.23491e+07	1.1792e+07	1.7127e+07	2.4425e+07	1.264e+07	1.31247e+07	1.08246e+07	1.57095e+07	1.39546e+07	9.5243e+06	1.03168e+07	9.79679e+06	1.01854e+07	1.04314e+07	1.11898e+07	1.20135e+07	1.21633e+07	1.29116e+07	1.2469e+07	1.23581e+07	1.3749e+07	1.36457e+07	1.22616e+07
9	MAC_00019	6.98419	NA	51748500	49977100	NA	52088800	41361600	NA	87529500	41929700	NA	43230100	51010900	NA	39511800	36678800	NA	48992400	39775000	2	4	NA	51748500	6.0221e+07	NA	52088800	4.98395e+07	NA	87529500	5.05241e+07	NA	43230100	6.14667e+07	NA	39511800	4.41969e+07	NA	48992400	4.79277e+07	NA	5.48357e+07	5.14028e+07	NA	5.25944e+07	5.22325e+07	NA	4.89007e+07	4.90113e+07
10	MAC_00020	7.55248	115235000	227259000	197846000	119292000	217756000	157471000	125080000	266253000	130571000	144715000	177682000	205025000	161273000	159487000	142638000	103895000	171330000	183104000	3	13	1.47015e+08	1.83926e+08	1.91614e+08	1.52191e+08	1.76235e+08	1.52511e+08	1.59575e+08	2.15485e+08	1.26458e+08	1.84625e+08	1.43802e+08	1.98567e+08	2.0575e+08	1.29076e+08	1.38145e+08	1.32548e+08	1.38661e+08	1.77337e+08	1.70779e+08	1.94898e+08	1.63556e+08	1.61993e+08	1.77946e+08	1.59833e+08	1.28102e+08	1.20386e+08	1.22672e+08
11	MAC_00021	6.33533	10828100	12543400	NA	11183600	13156800	NA	13612300	22787800	NA	12006700	10569800	NA	13535300	10043800	NA	9611920	11011800	NA	2	3	1.18379e+07	12543400	NA	1.22265e+07	13156800	NA	1.48817e+07	22787800	NA	1.31264e+07	10569800	NA	1.47975e+07	10043800	NA	1.05083e+07	11011800	NA	1.37513e+07	1.32917e+07	NA	1.30139e+07	1.32845e+07	NA	1.19465e+07	1.2731e+07	NA
12	MAC_00022	7.84789	158264000	402831000	274560000	141271000	388901000	217844000	162356000	546185000	202709000	167617000	333851000	305077000	207596000	291802000	212696000	136540000	286706000	232874000	3	11	2.37344e+08	2.65566e+08	2.7771e+08	2.1186e+08	2.56382e+08	2.20344e+08	2.4348e+08	3.60072e+08	2.05035e+08	2.5137e+08	2.20091e+08	3.08578e+08	3.11326e+08	1.9237e+08	2.15137e+08	2.04765e+08	1.89011e+08	2.35546e+08	2.75708e+08	2.81409e+08	2.37045e+08	2.25504e+08	2.58871e+08	2.30923e+08	1.95458e+08	2.01164e+08	1.98896e+08
13	MAC_00023	8.4714	550542000	965367000	1094980000	535718000	916389000	787261000	611329000	1249340000	735026000	654708000	779562000	1120460000	718557000	642809000	783165000	497820000	714292000	928593000	3	18	7.16439e+08	8.65236e+08	9.38804e+08	6.97148e+08	8.21339e+08	6.74975e+08	7.95543e+08	1.11976e+09	6.3019e+08	8.51994e+08	6.98704e+08	9.6065e+08	9.35083e+08	5.76135e+08	6.71463e+08	6.4783e+08	6.40204e+08	7.96149e+08	8.32245e+08	9.16854e+08	8.01334e+08	7.42047e+08	8.29311e+08	7.07382e+08	6.38636e+08	6.25581e+08	6.11321e+08
14	MAC_00024	7.07577	31172800	71852800	151754000	34331600	79675400	123625000	38888400	128930000	124342000	40802200	71172100	148132000	43024000	65078400	108847000	29954900	70968400	117036000	3	5	6.17878e+07	6.49791e+07	8.46611e+07	6.80488e+07	7.20533e+07	6.89684e+07	7.70809e+07	1.16596e+08	6.93684e+07	8.08742e+07	6.43635e+07	8.26404e+07	8.52781e+07	5.88527e+07	6.0724e+07	5.93737e+07	6.41793e+07	6.52925e+07	7.17752e+07	6.88555e+07	7.22641e+07	7.24314e+07	7.27527e+07	7.22797e+07	6.1878e+07	6.51395e+07	6.72914e+07
15	MAC_00025	7.36269	40078200	125237000	84455600	40478000	126225000	62895800	51549500	197073000	60528100	47862400	105408000	84507400	52260700	96860100	59982600	32218900	104272000	68060700	3	7	6.60761e+07	7.34839e+07	8.73037e+07	6.67352e+07	7.40636e+07	6.50168e+07	8.49886e+07	1.15634e+08	6.25693e+07	7.89097e+07	6.18491e+07	8.73573e+07	8.61611e+07	5.68335e+07	6.20054e+07	5.31186e+07	6.11825e+07	7.03559e+07	7.67567e+07	7.78678e+07	7.45198e+07	7.10332e+07	7.47825e+07	6.81385e+07	6.82261e+07	6.46022e+07	6.06958e+07
16	MAC_00026	9.13061	1334340000	2024820000	2747990000	1577570000	1898960000	2174490000	1798180000	3352210000	2463770000	1477110000	1989190000	2399470000	1744800000	1881170000	1842020000	1505740000	1737320000	1940800000	3	33	1.65649e+09	1.88049e+09	2.38347e+09	1.95844e+09	1.7636e+09	1.88604e+09	2.23231e+09	3.11326e+09	2.13695e+09	1.83373e+09	1.8474e+09	2.08118e+09	2.16604e+09	1.74708e+09	1.59767e+09	1.86927e+09	1.61348e+09	1.68335e+09	1.92424e+09	1.99268e+09	2.03445e+09	2.08457e+09	1.78072e+09	1.97659e+09	1.79203e+09	1.73931e+09	2.07296e+09
17	MAC_00028	7.68866	147880000	259733000	270333000	172113000	283465000	242986000	238358000	532415000	270501000	200749000	256794000	275986000	204154000	232910000	203948000	142077000	247517000	216528000	3	16	1.91069e+08	2.10481e+08	2.58186e+08	2.22379e+08	2.29713e+08	2.32068e+08	3.07971e+08	4.31456e+08	2.58346e+08	2.59378e+08	2.08099e+08	2.63585e+08	2.63778e+08	1.88744e+08	1.94784e+08	1.83571e+08	2.00582e+08	2.06799e+08	2.21954e+08	2.23038e+08	2.2038e+08	2.36701e+08	2.31943e+08	2.4321e+08	2.47229e+08	2.41044e+08	2.50611e+08
18	MAC_00029	6.86107	35824100	67479200	67958800	42386200	61044200	51694100	60644200	126180000	53079400	47961600	59280300	61268400	48463200	56647800	46876500	29777100	56662100	45855100	3	7	4.49652e+07	5.36294e+07	6.81258e+07	5.32018e+07	4.85151e+07	5.18211e+07	7.61186e+07	1.00282e+08	5.32098e+07	6.01998e+07	4.71132e+07	6.14189e+07	6.08294e+07	4.50211e+07	4.69917e+07	3.73752e+07	4.50324e+07	4.59678e+07	5.22335e+07	5.68287e+07	5.81501e+07	5.66282e+07	4.8986e+07	5.43092e+07	6.11056e+07	5.60253e+07	5.16166e+07
19	MAC_00031	7.43454	175356000	212373000	199139000	198369000	189073000	165866000	239076000	306741000	166474000	204663000	194968000	184575000	234943000	185557000	140289000	179664000	160600000	146668000	3	15	1.63687e+08	1.98371e+08	2.28394e+08	1.85169e+08	1.76607e+08	1.90233e+08	2.23167e+08	2.86517e+08	1.9093e+08	1.91044e+08	1.82113e+08	2.1169e+08	2.19309e+08	1.73323e+08	1.60898e+08	1.67709e+08	1.50011e+08	1.68214e+08	1.90146e+08	2.10205e+08	1.9495e+08	1.97094e+08	1.78321e+08	1.99366e+08	1.79151e+08	1.6007e+08	1.85213e+08
20	MAC_00032	7.93143	579972000	1056110000	1296140000	569982000	963896000	973435000	718589000	1674690000	947358000	714328000	869573000	1194240000	727535000	782028000	869126000	505633000	884637000	969614000	3	49	7.98594e+08	9.12059e+08	1.08998e+09	7.84838e+08	8.32423e+08	8.18605e+08	9.89463e+08	1.44627e+09	7.96675e+08	9.83596e+08	7.50965e+08	1.00429e+09	1.00178e+09	6.75361e+08	7.30887e+08	6.96233e+08	7.63974e+08	8.15391e+08	9.2768e+08	9.6647e+08	9.30375e+08	8.35385e+08	8.40503e+08	8.57908e+08	7.94309e+08	8.07996e+08	7.72821e+08
21	MAC_00034	6.90438	25351200	10887600	44685700	26530500	12232500	26889500	30368100	18256000	27646300	32492800	10035200	39448100	37725900	9099570	26205300	24722800	9409790	25969900	3	3	1.88578e+07	2.09111e+07	3.12774e+07	1.97351e+07	2.34941e+07	1.88211e+07	2.25897e+07	3.50631e+07	1.93508e+07	2.41702e+07	1.92739e+07	2.76114e+07	2.80629e+07	1.74769e+07	1.83422e+07	1.83904e+07	1.80728e+07	1.81774e+07	2.19061e+07	2.21586e+07	2.66974e+07	2.10061e+07	2.37222e+07	1.97247e+07	1.81343e+07	1.95889e+07	1.87714e+07
22	MAC_00035	7.91784	96847800	44743400	147445000	124435000	52059900	106969000	173473000	118645000	130684000	136927000	48099600	127453000	136713000	43762300	87672600	89974300	47692200	86332800	3	2	7.1687e+07	7.42445e+07	1.20045e+08	9.21071e+07	8.63851e+07	8.70907e+07	1.28405e+08	1.96872e+08	1.06399e+08	1.01354e+08	7.98136e+07	1.03768e+08	1.01195e+08	7.26166e+07	7.13802e+07	6.65992e+07	7.91376e+07	7.02894e+07	8.32746e+07	7.86738e+07	1.02467e+08	9.80391e+07	8.72236e+07	9.12722e+07	1.03079e+08	1.09988e+08	1.03213e+08
23	MAC_00036	7.0612	30465200	45543500	55605700	31935200	42372100	55241900	44473100	73021400	65363100	36796600	40009100	59411800	37752100	34388200	44484000	30753100	38918200	51213300	3	5	3.82468e+07	4.52279e+07	4.46014e+07	4.00923e+07	4.20784e+07	4.43096e+07	5.58327e+07	7.25153e+07	5.24278e+07	4.61954e+07	3.97318e+07	4.76543e+07	4.7395e+07	3.41499e+07	3.56807e+07	3.86082e+07	3.86485e+07	4.10783e+07	4.44291e+07	4.7926e+07	3.80704e+07	4.26744e+07	4.24869e+07	4.6437e+07	4.48207e+07	4.05126e+07	5.0858e+07
24	MAC_00038	6.96718	31758600	74440600	48888400	34016700	83413200	42508000	40903000	117764000	42351400	39668500	83783200	44494700	44330800	85936900	34623500	31120500	87212200	42063500	3	6	4.45804e+07	4.35861e+07	5.94819e+07	4.77502e+07	4.88397e+07	5.17189e+07	5.74166e+07	6.89527e+07	5.15284e+07	5.56837e+07	4.90564e+07	5.41361e+07	6.22283e+07	5.03174e+07	4.2126e+07	4.36847e+07	5.10641e+07	5.11781e+07	5.17865e+07	4.61864e+07	5.07719e+07	5.08254e+07	4.93138e+07	5.42021e+07	4.60922e+07	3.85223e+07	4.99855e+07
25	MAC_00042	6.56646	18591900	23162300	NA	20500800	20889900	NA	25912500	37701000	NA	23370400	18818600	NA	24321700	17571000	NA	17171800	20333100	NA	2	3	1.93532e+07	23162300	NA	2.13403e+07	20889900	NA	2.69736e+07	37701000	NA	2.43274e+07	18818600	NA	2.53177e+07	17571000	NA	1.7875e+07	20333100	NA	2.24815e+07	2.45441e+07	NA	2.27147e+07	2.10927e+07	NA	2.16535e+07	2.10627e+07	NA
26	MAC_00044	6.57094	40667600	18090300	9391440	38188200	19922200	9402010	42718900	32196900	8195000	48897900	16904600	10274700	53171500	13976500	7851780	37503800	14355900	9701950	3	6	1.82271e+07	1.89765e+07	1.99752e+07	1.71158e+07	2.08982e+07	1.99977e+07	1.91465e+07	3.37742e+07	1.74305e+07	2.19159e+07	1.77327e+07	2.18539e+07	2.38313e+07	1.46612e+07	1.67004e+07	1.68091e+07	1.50592e+07	2.06357e+07	2.11734e+07	2.01086e+07	1.70503e+07	1.82182e+07	2.1101e+07	2.09579e+07	1.53702e+07	1.88689e+07	1.69086e+07
27	MAC_00045	6.56722	6091050	NA	9737840	7687730	NA	7990600	10154700	NA	7855970	9106280	NA	9669750	9137370	NA	6739280	7424550	NA	7666460	2	3	6.11081e+06	NA	9.70636e+06	7.71266e+06	NA	7.96477e+06	1.01876e+07	NA	7.83057e+06	9.13582e+06	NA	9.63849e+06	9.16701e+06	NA	6.71749e+06	7.44863e+06	NA	7.64167e+06	7.09857e+06	NA	8.28505e+06	8.20939e+06	NA	8.34717e+06	8.17831e+06	NA	7.59611e+06
28	MAC_00047	7.14652	43771600	76130900	138403000	49072400	89522900	121291000	57247500	136742000	127043000	54960600	73393700	141756000	56291400	64190400	98582000	41701200	73518600	120952000	3	12	6.9952e+07	7.36354e+07	8.9539e+07	7.84233e+07	8.65884e+07	7.84685e+07	9.14881e+07	1.3226e+08	8.21897e+07	8.78333e+07	7.09879e+07	9.17082e+07	8.99601e+07	6.20863e+07	6.3777e+07	6.66433e+07	7.11087e+07	7.82491e+07	8.12592e+07	7.80283e+07	7.64277e+07	8.34741e+07	8.74289e+07	8.22359e+07	7.34437e+07	7.38904e+07	7.97288e+07
29	MAC_00048	7.1243	NA	16787400	38220000	NA	18801900	30590300	NA	37939000	33675300	NA	17093300	41608900	NA	13427800	28523100	NA	17729100	26196500	2	3	NA	16787400	2.23333e+07	NA	18801900	1.7875e+07	NA	37939000	1.96777e+07	NA	17093300	2.43136e+07	NA	13427800	1.66671e+07	NA	17729100	1.53076e+07	NA	1.77889e+07	1.9063e+07	NA	1.89844e+07	1.87332e+07	NA	2.11956e+07	1.90885e+07
30	MAC_00049	6.62749	11475800	10130200	46368400	11711100	11574600	40526000	11407500	14579700	38103400	13870100	9042720	47045300	16083500	8697330	35072800	10407200	7700810	39607000	3	6	1.59683e+07	1.73169e+07	1.94937e+07	1.62957e+07	1.9786e+07	1.70375e+07	1.58732e+07	2.49231e+07	1.6019e+07	1.92999e+07	1.5458e+07	1.97783e+07	2.23797e+07	1.48675e+07	1.47449e+07	1.44813e+07	1.3164e+07	1.66512e+07	1.85494e+07	1.835e+07	1.66392e+07	1.73452e+07	1.99781e+07	1.78555e+07	1.27425e+07	1.39239e+07	1.55394e+07
31	MAC_00050	7.20986	32271600	62308900	63479000	35590800	61775100	49544900	48689300	109685000	51854000	38044900	53904300	62047400	43763100	49246100	43838400	32989400	54744500	51191900	3	6	4.25929e+07	4.99253e+07	6.00265e+07	4.69736e+07	4.94976e+07	4.68503e+07	6.42614e+07	8.78856e+07	4.90338e+07	5.02126e+07	4.31911e+07	5.86728e+07	5.77596e+07	3.94587e+07	4.14541e+07	4.35402e+07	4.38643e+07	4.84077e+07	4.94777e+07	5.29037e+07	5.12368e+07	4.99989e+07	4.9978e+07	4.90997e+07	5.1587e+07	4.90997e+07	4.75656e+07
32	MAC_00051	6.70534	10380900	19173500	21444200	9347330	15220400	12206400	12027100	28191500	13181400	12015800	16391700	18661900	11683500	12866100	13611300	9294170	15158200	12015900	3	2	1.35405e+07	1.55553e+07	2.02644e+07	1.21923e+07	1.23481e+07	1.15349e+07	1.56878e+07	2.28715e+07	1.24562e+07	1.5673e+07	1.32984e+07	1.76352e+07	1.52396e+07	1.04381e+07	1.28625e+07	1.2123e+07	1.22977e+07	1.13548e+07	1.57292e+07	1.64832e+07	1.72971e+07	1.29776e+07	1.2468e+07	1.20887e+07	1.25936e+07	1.27778e+07	1.20833e+07
33	MAC_00052	6.56595	7571350	NA	154262000	7106100	NA	130496000	7138060	NA	127627000	8965740	NA	168283000	9475310	NA	123185000	6426210	NA	134461000	2	7	3.21339e+07	NA	3.63471e+07	3.01593e+07	NA	3.07474e+07	3.02949e+07	NA	3.00714e+07	3.80518e+07	NA	3.96507e+07	4.02145e+07	NA	2.90247e+07	2.72737e+07	NA	3.16816e+07	3.7328e+07	NA	3.10247e+07	3.21016e+07	NA	3.22236e+07	2.43198e+07	NA	2.9171e+07
34	MAC_00053	7.18346	59530800	41631700	71665500	59400200	39852400	56707800	58767200	73565200	59640400	67536600	33868400	60952700	70600200	30923900	45992100	50489600	38303600	56258700	3	6	5.15437e+07	5.30983e+07	6.48963e+07	5.14307e+07	5.08289e+07	5.13514e+07	5.08826e+07	9.38272e+07	5.4007e+07	5.84754e+07	4.31967e+07	5.51954e+07	6.1128e+07	3.94412e+07	4.16479e+07	4.37156e+07	4.88535e+07	5.09447e+07	5.98754e+07	5.6266e+07	5.53935e+07	5.4743e+07	5.13223e+07	5.38169e+07	4.08469e+07	5.24191e+07	5.23899e+07
35	MAC_00067	6.83803	14896100	NA	39500700	18182700	NA	32929700	22542200	NA	45706300	20449300	NA	45936000	19843300	NA	31530400	19035400	NA	30433800	2	4	2.08197e+07	NA	2.8262e+07	2.54133e+07	NA	2.35606e+07	3.15064e+07	NA	3.2702e+07	2.85812e+07	NA	3.28663e+07	2.77342e+07	NA	2.25594e+07	2.66051e+07	NA	2.17748e+07	2.4185e+07	NA	2.41236e+07	2.705e+07	NA	2.46918e+07	2.52923e+07	NA	3.17228e+07
36	MAC_00069	7.33895	125270000	164258000	210353000	151465000	196169000	199717000	199895000	327667000	209250000	173953000	158918000	221048000	182700000	145906000	172226000	118905000	151174000	185911000	3	18	1.4327e+08	1.60388e+08	1.88362e+08	1.73229e+08	1.91547e+08	1.78838e+08	2.28618e+08	3.19947e+08	1.87374e+08	1.98949e+08	1.55174e+08	1.97939e+08	2.08953e+08	1.42469e+08	1.54221e+08	1.35991e+08	1.47612e+08	1.66475e+08	1.66429e+08	1.69957e+08	1.6078e+08	1.84386e+08	1.93407e+08	1.87424e+08	1.83528e+08	1.78747e+08	1.81764e+08
37	MAC_00070	6.60082	4958020	5572190	35548300	5010990	6467210	30897500	7781920	12316700	34412800	6846020	5990990	33947800	7243310	4901030	26801500	4168430	5302430	29740200	3	5	8.98289e+06	9.215e+06	1.18643e+07	9.07886e+06	1.06951e+07	1.03121e+07	1.40992e+07	2.03687e+07	1.14853e+07	1.24036e+07	9.90759e+06	1.13301e+07	1.31234e+07	8.10507e+06	8.94503e+06	7.55232e+06	8.76888e+06	9.92583e+06	1.04349e+07	9.76474e+06	1.0127e+07	9.66357e+06	1.07989e+07	1.08072e+07	1.13184e+07	1.13795e+07	1.11414e+07
38	MAC_00072	6.70805	10634200	19018500	69410000	12538200	17196300	58240200	16386000	25230400	55793900	13945000	18485100	72286900	14954000	13094000	50994300	12020700	16033300	49601800	3	4	1.92615e+07	2.56648e+07	2.83972e+07	2.27101e+07	2.32058e+07	2.38273e+07	2.96796e+07	3.40476e+07	2.28265e+07	2.52583e+07	2.4945e+07	2.95742e+07	2.70858e+07	1.76699e+07	2.08629e+07	2.17728e+07	2.16364e+07	2.02932e+07	2.23749e+07	2.71959e+07	2.42389e+07	2.41728e+07	2.34311e+07	2.49714e+07	2.38258e+07	1.90216e+07	2.2143e+07
39	MAC_00079	8.02201	364708000	443047000	631534000	332967000	404867000	402404000	348045000	508555000	325813000	391918000	357485000	549654000	486494000	326211000	406054000	285649000	372388000	433375000	3	18	4.02833e+08	4.47029e+08	5.66671e+08	3.67774e+08	4.08506e+08	3.61074e+08	3.84428e+08	5.13126e+08	2.92349e+08	4.32888e+08	3.60698e+08	4.932e+08	5.3735e+08	3.29143e+08	3.64349e+08	3.1551e+08	3.75735e+08	3.88864e+08	4.67948e+08	4.73698e+08	4.83693e+08	3.9146e+08	4.12471e+08	3.7841e+08	3.08607e+08	2.86672e+08	2.83596e+08
40	MAC_00081	7.0281	34767900	93279600	111176000	38953600	99099500	97358800	55725700	187918000	115045000	44834300	93757900	115942000	43622300	84325300	85940900	32191700	92224100	77090800	3	9	6.36702e+07	6.73358e+07	8.40995e+07	7.13355e+07	7.1537e+07	7.36475e+07	1.0205e+08	1.35652e+08	8.70263e+07	8.21048e+07	6.76811e+07	8.77048e+07	7.98853e+07	6.0872e+07	6.50103e+07	5.89525e+07	6.65739e+07	5.83157e+07	7.3962e+07	7.13529e+07	7.17848e+07	7.59298e+07	7.22314e+07	7.71835e+07	8.19226e+07	7.57859e+07	8.44205e+07
41	MAC_00083	7.84742	27087100	52824200	59882600	32065100	70738600	45582000	46287600	144763000	59455200	36333600	63689400	60217300	37361100	46464500	42845000	30075500	66483100	41332200	3	5	3.89272e+07	3.78747e+07	5.81156e+07	4.60812e+07	5.07193e+07	4.4237e+07	6.65205e+07	1.03794e+08	5.77008e+07	5.22155e+07	4.5665e+07	5.84404e+07	5.36921e+07	3.33149e+07	4.15808e+07	4.32219e+07	4.76681e+07	4.01126e+07	4.52195e+07	4.01343e+07	4.96057e+07	4.9049e+07	5.12116e+07	4.63609e+07	5.34005e+07	5.79876e+07	5.59732e+07
42	MAC_00084	7.25852	51111000	68535400	113044000	67782200	71900800	83191300	100937000	126783000	85958200	71590300	62280400	118338000	73073100	49353400	87363000	58649200	61671100	79479000	3	9	5.68702e+07	7.50126e+07	9.28234e+07	7.54199e+07	7.86961e+07	6.83106e+07	1.12311e+08	1.38765e+08	7.05825e+07	7.96571e+07	6.81665e+07	9.71705e+07	8.1307e+07	5.40178e+07	7.17361e+07	6.52578e+07	6.74996e+07	6.52623e+07	6.60628e+07	7.94877e+07	7.92312e+07	8.02773e+07	7.946e+07	7.15903e+07	9.01593e+07	7.75249e+07	6.84692e+07
43	MAC_00085	7.2698	80402800	92202100	127109000	92449400	105576000	116697000	130011000	213710000	139082000	107048000	98610600	137913000	104946000	84613400	100170000	73237500	92281200	97763600	3	10	8.96241e+07	9.14532e+07	1.14965e+08	1.03052e+08	1.04718e+08	1.05547e+08	1.44922e+08	2.11974e+08	1.25794e+08	1.19325e+08	9.78097e+07	1.24736e+08	1.16982e+08	8.39261e+07	9.05995e+07	8.1637e+07	9.15317e+07	8.8423e+07	1.04111e+08	9.69091e+07	9.81303e+07	1.09689e+08	1.05735e+08	1.10615e+08	1.16339e+08	1.18425e+08	1.22027e+08
44	MAC_00087	6.78637	26434400	21205400	31339800	30894100	21189300	26362200	35339600	36207500	25322600	35481100	19110900	30533800	37628600	17953500	23130500	26647200	18416900	28420000	3	5	2.21346e+07	2.60571e+07	3.04589e+07	2.58689e+07	2.60373e+07	2.56212e+07	2.95913e+07	4.44916e+07	2.46108e+07	2.97098e+07	2.34834e+07	2.96756e+07	3.1508e+07	2.20612e+07	2.24804e+07	2.23128e+07	2.26306e+07	2.76212e+07	2.57125e+07	2.76116e+07	2.59988e+07	2.75349e+07	2.62901e+07	2.68514e+07	2.37549e+07	2.48564e+07	2.3874e+07
45	MAC_00089	6.4397	10213300	NA	10666700	10139700	NA	7346650	12194700	NA	7410190	11255100	NA	9168340	13924000	NA	6598360	10188100	NA	7769460	2	3	8.64552e+06	NA	1.2601e+07	8.58321e+06	NA	8.6789e+06	1.03228e+07	NA	8.75396e+06	9.52739e+06	NA	1.08309e+07	1.17866e+07	NA	7.79491e+06	8.62418e+06	NA	9.17838e+06	1.0043e+07	NA	1.07558e+07	9.136e+06	NA	9.09559e+06	8.28678e+06	NA	8.49185e+06
46	MAC_00091	7.09186	58489400	80279900	120598000	63432700	91412900	112353000	86604200	173431000	130392000	73397000	74121800	127090000	77729600	67959900	88045000	53868800	74279800	96219400	3	10	7.52334e+07	7.94439e+07	9.47443e+07	8.15918e+07	9.04609e+07	8.82668e+07	1.11397e+08	1.71625e+08	1.02439e+08	9.44086e+07	7.33499e+07	9.98445e+07	9.99816e+07	6.72522e+07	6.917e+07	6.929e+07	7.35063e+07	7.5592e+07	8.73942e+07	8.41833e+07	8.08708e+07	8.68466e+07	9.1339e+07	9.25048e+07	8.94257e+07	9.58829e+07	9.93714e+07
47	MAC_00094	8.70472	579712000	1290800000	1840030000	658849000	1304570000	1752550000	1260780000	3296430000	2271670000	837179000	1181070000	2378430000	786503000	953604000	1546040000	536745000	993082000	1466860000	3	28	9.58139e+08	1.17147e+09	1.2267e+09	1.08894e+09	1.18396e+09	1.16838e+09	2.0838e+09	2.99167e+09	1.51446e+09	1.38368e+09	1.07188e+09	1.58564e+09	1.29992e+09	8.65443e+08	1.0307e+09	8.87124e+08	9.01271e+08	9.77917e+08	1.11301e+09	1.24135e+09	1.04707e+09	1.15907e+09	1.19545e+09	1.22448e+09	1.67281e+09	1.67138e+09	1.46912e+09
48	MAC_00096	6.70073	NA	78370200	71307500	NA	70606000	49465600	NA	110086000	54183900	NA	66466700	68094300	NA	59712000	46624000	NA	69959600	45641100	2	3	NA	7.83702e+07	9.64075e+07	NA	70606000	6.68773e+07	NA	110086000	7.32564e+07	NA	66466700	9.20632e+07	NA	5.9712e+07	6.30355e+07	NA	69959600	6.17066e+07	NA	8.30456e+07	8.22904e+07	NA	7.12914e+07	7.00882e+07	NA	6.15025e+07	7.1063e+07
49	MAC_00097	7.71923	100249000	133576000	205872000	115883000	134368000	181871000	175042000	256820000	198520000	132809000	120311000	216574000	132013000	104749000	148925000	96891600	114303000	164607000	3	9	1.19018e+08	1.42221e+08	1.62865e+08	1.37579e+08	1.43064e+08	1.43878e+08	2.07815e+08	2.73441e+08	1.57049e+08	1.57674e+08	1.28097e+08	1.71332e+08	1.56729e+08	1.11528e+08	1.17815e+08	1.15032e+08	1.21701e+08	1.30221e+08	1.38257e+08	1.50705e+08	1.39017e+08	1.4644e+08	1.44453e+08	1.50786e+08	1.66827e+08	1.52765e+08	1.52347e+08
50	MAC_00098	7.07567	24027500	46307300	67106400	27364500	45487900	51582400	36061800	79114800	49938100	32174200	38628100	64454400	34969300	34632200	43265700	23238400	36381400	47140800	3	5	3.38568e+07	4.25076e+07	5.18812e+07	3.85589e+07	4.17554e+07	3.98793e+07	5.08141e+07	7.26231e+07	3.86081e+07	4.53362e+07	3.54585e+07	4.98309e+07	4.92747e+07	3.17905e+07	3.34495e+07	3.27449e+07	3.33961e+07	3.64454e+07	3.93295e+07	4.50435e+07	4.42842e+07	4.10422e+07	4.21607e+07	4.1794e+07	4.07919e+07	4.05728e+07	3.74521e+07
51	MAC_00100	6.68516	9828940	16353500	19023300	12628600	18584400	16078900	16651800	33645900	16657100	12985600	14437700	20233800	13402300	13638600	15983000	10174200	15563800	15647500	3	2	1.2343e+07	1.43579e+07	1.72541e+07	1.58588e+07	1.63166e+07	1.45835e+07	2.09111e+07	2.95401e+07	1.51079e+07	1.63071e+07	1.26759e+07	1.8352e+07	1.68304e+07	1.19743e+07	1.44965e+07	1.27766e+07	1.36646e+07	1.41922e+07	1.43382e+07	1.52144e+07	1.47275e+07	1.68802e+07	1.64749e+07	1.52837e+07	1.67867e+07	1.65034e+07	1.46556e+07
52	MAC_00102	7.50241	49139300	93654600	105209000	47997300	84965500	84054900	65156200	137889000	81529500	58391500	79254800	99241100	59981500	79080400	74364600	44780200	78731700	82307800	3	6	6.86242e+07	7.78626e+07	9.06161e+07	6.70293e+07	7.06386e+07	7.23961e+07	9.09921e+07	1.14638e+08	7.0221e+07	8.15451e+07	6.58909e+07	8.54759e+07	8.37655e+07	6.57459e+07	6.40499e+07	6.25366e+07	6.5456e+07	7.08914e+07	7.97167e+07	8.25077e+07	7.73471e+07	7.13463e+07	7.13243e+07	7.5872e+07	7.30455e+07	6.40457e+07	6.81184e+07
53	MAC_00105	6.37997	8110500	12417100	NA	10112200	14447400	NA	13977100	26592100	NA	11520800	13614700	NA	11859300	11621800	NA	8947830	13635500	NA	2	3	1.13076e+07	12417100	NA	1.40984e+07	14447400	NA	1.94868e+07	26592100	NA	1.60623e+07	13614700	NA	1.65342e+07	11621800	NA	1.2475e+07	13635500	NA	1.31354e+07	1.31579e+07	NA	1.50064e+07	1.45876e+07	NA	1.56434e+07	1.48564e+07	NA
54	MAC_00106	7.16615	134013000	178175000	138469000	159753000	208143000	116645000	222454000	369168000	128638000	176503000	178433000	135040000	184679000	168748000	103377000	135439000	185990000	108527000	3	18	1.29582e+08	1.38866e+08	1.83741e+08	1.54471e+08	1.62223e+08	1.54782e+08	2.15099e+08	2.87722e+08	1.70696e+08	1.70667e+08	1.39067e+08	1.79191e+08	1.78573e+08	1.31519e+08	1.37176e+08	1.30961e+08	1.44957e+08	1.4401e+08	1.50528e+08	1.4715e+08	1.56836e+08	1.64419e+08	1.63797e+08	1.62213e+08	1.72674e+08	1.60744e+08	1.65585e+08
55	MAC_00108	8.27491	195704000	412798000	440963000	215989000	372659000	381152000	339573000	847406000	461852000	259209000	327537000	478323000	251479000	273605000	340212000	173925000	313995000	353619000	3	15	2.79694e+08	3.51015e+08	3.62853e+08	3.08685e+08	3.16884e+08	3.13636e+08	4.85307e+08	7.20576e+08	3.80041e+08	3.70453e+08	2.78515e+08	3.93595e+08	3.59406e+08	2.32655e+08	2.79948e+08	2.48568e+08	2.67e+08	2.9098e+08	3.24904e+08	3.71956e+08	3.0972e+08	3.28565e+08	3.1996e+08	3.28695e+08	3.89589e+08	4.02569e+08	3.68662e+08
56	MAC_00109	7.12438	8446480	17378000	50124800	8904480	18420300	41890100	11241400	33745500	44196500	10509000	14637700	43370100	10791300	14638700	34252000	7905120	15968100	38210500	3	4	1.71357e+07	1.84449e+07	2.32783e+07	1.80648e+07	1.95512e+07	1.9454e+07	2.28058e+07	3.58173e+07	2.05251e+07	2.132e+07	1.55364e+07	2.01414e+07	2.18927e+07	1.55374e+07	1.59068e+07	1.60374e+07	1.69484e+07	1.77452e+07	1.99055e+07	1.95453e+07	1.98696e+07	1.92283e+07	1.9741e+07	2.03881e+07	1.83078e+07	2.00103e+07	1.99106e+07
57	MAC_00110	6.98967	67682300	101500000	59876900	74407200	127935000	56145200	104122000	210239000	59069600	87905000	108238000	58595200	89488600	100159000	42030000	65234200	109870000	50495000	3	10	6.80726e+07	6.73894e+07	8.96679e+07	7.48362e+07	8.49405e+07	8.40795e+07	1.04722e+08	1.39585e+08	8.84589e+07	8.84119e+07	7.1863e+07	8.77485e+07	9.00046e+07	6.64991e+07	6.29415e+07	6.56103e+07	7.29465e+07	7.56181e+07	7.90759e+07	7.14097e+07	7.65377e+07	7.9656e+07	8.5765e+07	8.81164e+07	8.40677e+07	7.79829e+07	8.58103e+07
58	MAC_00111	8.46924	492213000	770036000	600230000	589308000	862206000	505044000	833441000	1727790000	569883000	661657000	702071000	598811000	662257000	632190000	413964000	456306000	740968000	431585000	3	18	5.23037e+08	5.80984e+08	7.48662e+08	6.26212e+08	6.50525e+08	6.29937e+08	8.85633e+08	1.3036e+09	7.1081e+08	7.03091e+08	5.29705e+08	7.46892e+08	7.03729e+08	4.76981e+08	5.16334e+08	4.84881e+08	5.59052e+08	5.38312e+08	6.07581e+08	6.15644e+08	6.39035e+08	6.66542e+08	6.5684e+08	6.60182e+08	7.10958e+08	7.28291e+08	6.89527e+08
59	MAC_00112	7.04204	NA	26675400	34704700	NA	30600100	25040200	NA	55777600	28328500	NA	23224800	28028900	NA	23266300	22485600	NA	23635800	21927000	2	4	NA	26675400	3.7948e+07	NA	30600100	2.73803e+07	NA	55777600	3.09759e+07	NA	23224800	3.06483e+07	NA	23266300	2.4587e+07	NA	23635800	2.39762e+07	NA	2.82668e+07	3.23912e+07	NA	3.08971e+07	2.86949e+07	NA	3.11617e+07	3.00484e+07
60	MAC_00115	7.34597	67643500	53915200	119374000	72751400	52713800	108497000	94219400	89934300	112066000	90443300	47406700	125268000	88704200	41342100	89991700	59008500	43962900	94872100	3	12	6.63662e+07	7.75996e+07	8.45358e+07	7.13777e+07	7.58704e+07	7.68332e+07	9.24403e+07	1.29441e+08	7.93606e+07	8.87355e+07	6.8232e+07	8.87097e+07	8.70292e+07	5.95032e+07	6.37285e+07	5.78943e+07	6.32753e+07	6.71846e+07	7.70937e+07	8.2229e+07	7.21572e+07	7.59746e+07	7.66069e+07	8.05221e+07	7.42081e+07	7.2316e+07	7.69844e+07
61	MAC_00116	6.84309	NA	62106400	18252800	NA	53826000	17004200	NA	79618600	14131700	NA	45750700	19536500	NA	39170200	15115700	NA	42841000	14750800	2	3	NA	6.21064e+07	5.83705e+07	NA	5.3826e+07	5.43777e+07	NA	7.96186e+07	4.51917e+07	NA	45750700	6.24757e+07	NA	39170200	4.83384e+07	NA	42841000	4.71715e+07	NA	6.58115e+07	4.98233e+07	NA	5.43485e+07	5.69885e+07	NA	4.44811e+07	4.38386e+07
62	MAC_00117	6.61743	12350200	27636800	NA	14164600	27414300	NA	19050800	62700900	NA	14286600	26811900	NA	17767300	24728900	NA	12461300	26858700	NA	2	3	2.56497e+07	27636800	NA	2.9418e+07	27414300	NA	3.9566e+07	6.27009e+07	NA	2.96714e+07	26811900	NA	3.69003e+07	24728900	NA	2.58805e+07	26858700	NA	2.97958e+07	2.92855e+07	NA	3.13126e+07	2.76804e+07	NA	3.17623e+07	3.50296e+07	NA
63	MAC_00118	6.83609	13579100	27242100	36136900	15465800	27881900	30961500	19237200	46710400	33678800	16164500	26429600	36439400	16666000	24721000	26395200	13496000	30706100	29392100	3	5	2.13729e+07	2.24562e+07	2.78525e+07	2.43424e+07	2.29836e+07	2.38635e+07	3.02784e+07	3.85043e+07	2.59579e+07	2.54421e+07	2.17864e+07	2.80856e+07	2.62315e+07	2.0378e+07	2.03441e+07	2.12421e+07	2.53117e+07	2.26539e+07	2.48276e+07	2.37959e+07	2.3774e+07	2.59102e+07	2.32067e+07	2.50093e+07	2.43065e+07	2.15115e+07	2.51807e+07
64	MAC_00119	6.51949	6725540	8485000	21558800	7600880	9869690	17698300	8801050	17827000	18002000	9427560	7713140	22656100	8384310	8345580	14811300	6325490	8970900	18799700	3	3	9.70669e+06	9.78928e+06	1.29474e+07	1.097e+07	1.13868e+07	1.06289e+07	1.27022e+07	2.05673e+07	1.08113e+07	1.36064e+07	8.89877e+06	1.36064e+07	1.21007e+07	9.62843e+06	8.89509e+06	9.12931e+06	1.03499e+07	1.12904e+07	1.12757e+07	1.03733e+07	1.10515e+07	1.16765e+07	1.14973e+07	1.11392e+07	1.01969e+07	1.14905e+07	1.04876e+07
65	MAC_00120	7.21866	35732400	43905600	80346300	41150500	56288100	66103600	58813300	106085000	73565200	52540300	44922000	74810500	54350600	40648700	59340900	30903000	38224900	58668700	3	3	4.33174e+07	4.60061e+07	6.32514e+07	4.98856e+07	5.89809e+07	5.20391e+07	7.12978e+07	1.1116e+08	5.79131e+07	6.36932e+07	4.70711e+07	5.88934e+07	6.58878e+07	4.25933e+07	4.67152e+07	3.74629e+07	4.00536e+07	4.61861e+07	5.03193e+07	4.87507e+07	5.39895e+07	5.30985e+07	5.95535e+07	5.45376e+07	5.72356e+07	6.21026e+07	5.61791e+07
66	MAC_00121	6.9989	24298500	64598800	53711300	22765900	70724800	49841300	32878500	111924000	54732800	26938900	58559500	57270200	33964000	50737600	39580400	20884900	58252800	43537400	3	6	4.06628e+07	4.29388e+07	4.82861e+07	3.80981e+07	4.70107e+07	4.4807e+07	5.50212e+07	7.43958e+07	4.92045e+07	4.50814e+07	3.89245e+07	5.14856e+07	5.68377e+07	3.37252e+07	3.55825e+07	3.49503e+07	3.87206e+07	3.91399e+07	4.72356e+07	4.55004e+07	4.12156e+07	4.05517e+07	4.7467e+07	4.69583e+07	4.41692e+07	4.15632e+07	4.77312e+07
67	MAC_00122	6.32116	12937500	NA	14770100	14103500	NA	12533000	18665200	NA	13738100	16257600	NA	13962900	16519400	NA	10159300	11502200	NA	11533300	2	2	1.1975e+07	NA	1.59572e+07	1.30543e+07	NA	1.35403e+07	1.72766e+07	NA	1.48423e+07	1.50481e+07	NA	1.50851e+07	1.52905e+07	NA	1.09758e+07	1.06465e+07	NA	1.24603e+07	1.39107e+07	NA	1.36206e+07	1.3895e+07	NA	1.41904e+07	1.38691e+07	NA	1.43979e+07
68	MAC_00123	7.11658	28720500	51758300	73506400	31211700	56375700	61007500	42772900	104663000	66738500	36578500	46935400	67283700	39131800	47440200	52025600	26671700	50581000	54704500	3	8	4.1961e+07	4.46818e+07	5.82801e+07	4.56007e+07	4.8668e+07	4.83703e+07	6.24917e+07	9.03534e+07	5.29141e+07	5.34416e+07	4.05183e+07	5.33464e+07	5.7172e+07	4.09541e+07	4.12489e+07	3.89677e+07	4.36655e+07	4.33729e+07	4.87436e+07	4.73475e+07	4.97461e+07	4.85375e+07	4.91404e+07	5.06926e+07	5.01663e+07	5.04783e+07	5.13298e+07
69	MAC_00124	6.96694	NA	38163200	15101200	NA	40273200	10499600	NA	90804400	13813500	NA	34546100	12940100	NA	38296600	9657930	NA	37103400	9922120	2	2	NA	38163200	5.57163e+07	NA	40273200	3.87386e+07	NA	9.08044e+07	5.09653e+07	NA	34546100	4.77429e+07	NA	38296600	3.56332e+07	NA	37103400	3.6608e+07	NA	4.04399e+07	4.75578e+07	NA	4.06641e+07	4.05985e+07	NA	5.07303e+07	4.94393e+07
70	MAC_00125	5.97326	6388340	NA	3294140	7686500	NA	2413490	10810500	NA	2951590	8876460	NA	3283300	9006740	NA	2011160	6424860	NA	2215660	2	2	3.66207e+06	NA	5.74649e+06	4.40624e+06	NA	4.21023e+06	6.19705e+06	NA	5.14893e+06	5.08837e+06	NA	5.72758e+06	5.16306e+06	NA	3.50839e+06	3.68301e+06	NA	3.86513e+06	4.25402e+06	NA	4.90503e+06	4.69001e+06	NA	4.41238e+06	4.97479e+06	NA	4.99476e+06
71	MAC_00126	9.5111	1173270000	1505400000	1993760000	1273470000	1471830000	1671460000	1814880000	2702570000	2365280000	1566460000	1445730000	2153190000	1547040000	1139930000	1462670000	1000080000	1120320000	1495890000	3	14	1.32963e+09	1.56435e+09	1.693e+09	1.44318e+09	1.52947e+09	1.41932e+09	2.05675e+09	2.8084e+09	2.00848e+09	1.77522e+09	1.50234e+09	1.82838e+09	1.75321e+09	1.18457e+09	1.24203e+09	1.13336e+09	1.16419e+09	1.27024e+09	1.54455e+09	1.65768e+09	1.44509e+09	1.53613e+09	1.54431e+09	1.48747e+09	1.65109e+09	1.56899e+09	1.94834e+09
72	MAC_00127	6.93467	70164700	157271000	197393000	51166000	66264100	99558500	44252200	95415400	109847000	60391300	76276100	198546000	99480800	72187400	134143000	55626500	75188200	145926000	3	4	1.04157e+08	1.65945e+08	1.26022e+08	7.5954e+07	6.9919e+07	6.35613e+07	6.56907e+07	1.00678e+08	7.01298e+07	8.96486e+07	8.04832e+07	1.26758e+08	1.47675e+08	7.6169e+07	8.56411e+07	8.25754e+07	7.93353e+07	9.31637e+07	1.20993e+08	1.75845e+08	1.07568e+08	8.08457e+07	7.05977e+07	6.6613e+07	5.27344e+07	5.62466e+07	6.80299e+07
73	MAC_00129	8.03134	357534000	499133000	667664000	403164000	512356000	575469000	541897000	873516000	596655000	504262000	438424000	708821000	494735000	364299000	508645000	314837000	393122000	552080000	3	18	4.18485e+08	5.09012e+08	5.5935e+08	4.71894e+08	5.22497e+08	4.82111e+08	6.34278e+08	8.90805e+08	4.9986e+08	5.90227e+08	4.47101e+08	5.9383e+08	5.79076e+08	3.71509e+08	4.26128e+08	3.6851e+08	4.00903e+08	4.62517e+08	4.8613e+08	5.39378e+08	4.77444e+08	5.02286e+08	5.27568e+08	5.05259e+08	5.09178e+08	4.97672e+08	4.84893e+08
74	MAC_00133	7.39946	91574700	79164500	152637000	103381000	101750000	122762000	143711000	182606000	145308000	115834000	85526100	139150000	128567000	80562200	109323000	89553600	86799600	104115000	3	11	9.22984e+07	9.00231e+07	1.33173e+08	1.04198e+08	1.15707e+08	1.07108e+08	1.44847e+08	2.07653e+08	1.26779e+08	1.16749e+08	9.72573e+07	1.21406e+08	1.29583e+08	9.16125e+07	9.53826e+07	9.02614e+07	9.87054e+07	9.08387e+07	1.07218e+08	9.53936e+07	1.13673e+08	1.10909e+08	1.1683e+08	1.1225e+08	1.16278e+08	1.16011e+08	1.22983e+08
75	MAC_00140	7.24921	27905400	72465100	149616000	30009300	66408800	107170000	44805400	146331000	120647000	36247500	63117300	174568000	37313500	54521100	120160000	26686200	64991900	108929000	3	9	5.69703e+07	6.69622e+07	7.9308e+07	6.12655e+07	6.13658e+07	5.68083e+07	9.14726e+07	1.35219e+08	6.39522e+07	7.40012e+07	5.83243e+07	9.25344e+07	7.61775e+07	5.03808e+07	6.3694e+07	5.44813e+07	6.00565e+07	5.77407e+07	6.61791e+07	7.0957e+07	6.76948e+07	6.52113e+07	6.19615e+07	5.95358e+07	7.34312e+07	7.55436e+07	6.20373e+07
76	MAC_00147	6.69027	10304400	18186400	NA	11871800	18137900	NA	18337600	37133000	NA	12077300	15346700	NA	14453400	13631900	NA	10096700	16087000	NA	2	2	1.52304e+07	18186400	NA	1.75471e+07	18137900	NA	2.71039e+07	37133000	NA	1.78509e+07	15346700	NA	2.13629e+07	13631900	NA	1.49235e+07	16087000	NA	1.76923e+07	1.92714e+07	NA	1.86772e+07	1.8314e+07	NA	2.17582e+07	2.07454e+07	NA
77	MAC_00169	7.14952	58596800	86600000	47635200	64205200	85483200	40380100	76047300	125021000	36932900	73616500	72359900	47065800	81008500	68778200	33649900	54466900	72641900	39695900	3	4	5.31554e+07	6.34551e+07	7.16647e+07	5.8243e+07	6.26368e+07	6.07498e+07	6.89855e+07	9.16076e+07	5.55637e+07	6.67804e+07	5.30208e+07	7.08081e+07	7.3486e+07	5.03964e+07	5.06246e+07	4.9409e+07	5.32275e+07	5.97205e+07	6.17476e+07	6.72407e+07	6.11708e+07	6.19941e+07	6.32448e+07	6.36666e+07	5.53793e+07	5.11791e+07	5.39e+07
78	MAC_00170	7.67983	41836900	81272600	NA	43602600	72566200	NA	52590000	113303000	NA	50080000	71065800	NA	59109600	60042800	NA	41625500	57013800	NA	2	2	6.4757e+07	81272600	NA	6.74901e+07	7.25662e+07	NA	8.14012e+07	113303000	NA	7.75161e+07	71065800	NA	9.14925e+07	6.00428e+07	NA	6.44298e+07	5.70138e+07	NA	7.52245e+07	8.61211e+07	NA	7.18367e+07	7.32706e+07	NA	6.53462e+07	6.32998e+07	NA
79	MAC_00173	7.53172	80683600	99358700	185769000	87248900	97125300	162892000	94395500	131099000	168146000	99950600	79782300	192962000	123836000	72904900	136130000	75327500	83131200	165626000	3	8	9.83464e+07	1.21366e+08	1.24769e+08	1.06349e+08	1.18638e+08	1.09404e+08	1.1506e+08	1.60137e+08	1.12933e+08	1.21831e+08	9.74539e+07	1.296e+08	1.50945e+08	8.90531e+07	9.14299e+07	9.18177e+07	1.01545e+08	1.11241e+08	1.14243e+08	1.28607e+08	1.06499e+08	1.13198e+08	1.1979e+08	1.14657e+08	9.23664e+07	8.94649e+07	1.09552e+08
80	MAC_00175	6.83285	NA	31216000	14704500	NA	20680400	13003900	NA	58010600	13611900	NA	21050800	17695200	NA	18279400	12775800	NA	22297800	12482800	2	3	NA	31216000	2.7602e+07	NA	20680400	2.44097e+07	NA	58010600	2.5551e+07	NA	21050800	3.32158e+07	NA	18279400	2.39816e+07	NA	22297800	2.34316e+07	NA	3.30783e+07	2.35602e+07	NA	2.08811e+07	2.55817e+07	NA	3.24092e+07	2.4786e+07
81	MAC_00176	6.68279	NA	7158980	7815690	NA	6956950	5059260	NA	12977800	5175600	NA	7573310	5657450	NA	7307940	4722430	NA	7522210	4026590	2	3	NA	7158980	1.18621e+07	NA	6956950	7.67857e+06	NA	12977800	7.85514e+06	NA	7.57331e+06	8.58645e+06	NA	7307940	7.16735e+06	NA	7522210	6.11126e+06	NA	7.58607e+06	1.01251e+07	NA	7.02448e+06	8.04723e+06	NA	7.2504e+06	7.61994e+06
82	MAC_00195	6.59786	8636080	NA	12195700	10301800	NA	10392000	15292900	NA	13733000	10198100	NA	11845000	11417000	NA	9481760	9006840	NA	11500900	2	3	8.96958e+06	NA	1.17423e+07	1.06996e+07	NA	1.00056e+07	1.58835e+07	NA	1.32224e+07	1.05919e+07	NA	1.14046e+07	1.18579e+07	NA	9.12922e+06	9.35465e+06	NA	1.10733e+07	1.04194e+07	NA	1.00228e+07	1.13887e+07	NA	1.0486e+07	1.27507e+07	NA	1.28265e+07
83	MAC_00197	6.68013	NA	7376000	42469400	NA	7668780	33100000	NA	15122700	40663100	NA	7438950	39056600	NA	6763360	30424300	NA	8960170	28521500	2	3	NA	7376000	1.02622e+07	NA	7.66878e+06	7.99817e+06	NA	15122700	9.82569e+06	NA	7.43895e+06	9.4375e+06	NA	6763360	7.35162e+06	NA	8.96017e+06	6.89183e+06	NA	7.81603e+06	8.75946e+06	NA	7.74322e+06	8.38218e+06	NA	8.4487e+06	9.53149e+06
84	MAC_00201	7.78659	193913000	456318000	363869000	186710000	458576000	304300000	255635000	786249000	296535000	282144000	479411000	357319000	254127000	364571000	262248000	167049000	377173000	290277000	3	17	2.80887e+08	3.07922e+08	3.7226e+08	2.70454e+08	3.09446e+08	3.11317e+08	3.70293e+08	5.30559e+08	3.03373e+08	4.08692e+08	3.23505e+08	3.65559e+08	3.68109e+08	2.46012e+08	2.68296e+08	2.41974e+08	2.54515e+08	2.96971e+08	3.2629e+08	3.26292e+08	3.1775e+08	2.87872e+08	3.1245e+08	3.26264e+08	2.97259e+08	2.96411e+08	2.9429e+08
85	MAC_00202	7.82122	233292000	194896000	258038000	191605000	198127000	133671000	193470000	269728000	130639000	250665000	186164000	178815000	268820000	180174000	148747000	189945000	206208000	171663000	3	6	2.07462e+08	1.86179e+08	3.03751e+08	1.7039e+08	1.89265e+08	1.57352e+08	1.72049e+08	2.57664e+08	1.53783e+08	2.22911e+08	1.77837e+08	2.10493e+08	2.39056e+08	1.72115e+08	1.75099e+08	1.68914e+08	1.96985e+08	2.02074e+08	2.40996e+08	1.97286e+08	2.59273e+08	1.81364e+08	1.91102e+08	1.64907e+08	1.38115e+08	1.43951e+08	1.49178e+08
86	MAC_00203	7.03054	54294700	92928000	59143400	61347600	108718000	50303100	83758300	198614000	56046700	77899000	86703900	61142900	77259600	75629800	44771000	46862000	78860800	43777600	3	7	5.80657e+07	6.46569e+07	7.94832e+07	6.56085e+07	7.56432e+07	6.76027e+07	8.95757e+07	1.38191e+08	7.53216e+07	8.33094e+07	6.03264e+07	8.21704e+07	8.26256e+07	5.26213e+07	6.01681e+07	5.01168e+07	5.48693e+07	5.8833e+07	6.74515e+07	6.85142e+07	6.78444e+07	6.98339e+07	7.63775e+07	7.08485e+07	7.19085e+07	7.72039e+07	7.30663e+07
87	MAC_00205	7.15155	105870000	147435000	94076200	108474000	155005000	76071200	127136000	191719000	73413100	133855000	132870000	93565400	152465000	110229000	65780500	99021100	111315000	75205400	3	10	9.68022e+07	1.16336e+08	1.30393e+08	9.91832e+07	1.22309e+08	1.05437e+08	1.16247e+08	1.51279e+08	1.01753e+08	1.2239e+08	1.04843e+08	1.29685e+08	1.39406e+08	8.69782e+07	9.11739e+07	9.05399e+07	8.78351e+07	1.04237e+08	1.1245e+08	1.23277e+08	1.11299e+08	1.05571e+08	1.23497e+08	1.10499e+08	9.33192e+07	8.45163e+07	9.87062e+07
88	MAC_00208	6.62611	33527300	51283100	19523600	44324100	56105400	22391300	77286500	148336000	34175400	51406300	60562800	26452700	50403000	48854100	21464600	32083100	42616000	16658000	3	8	2.92059e+07	3.34871e+07	3.4323e+07	3.86111e+07	3.66359e+07	3.93645e+07	6.73248e+07	9.68611e+07	6.00813e+07	4.47804e+07	3.95466e+07	4.65046e+07	4.39064e+07	3.1901e+07	3.77353e+07	2.79478e+07	2.78276e+07	2.92852e+07	3.39268e+07	3.54848e+07	2.92971e+07	4.10977e+07	3.69916e+07	4.12545e+07	5.40462e+07	5.41141e+07	5.82823e+07
89	MAC_00210	6.42907	19110900	6643340	12828800	19194900	5596210	9270270	26000100	11445300	9421900	25284500	7257620	11486700	22599400	6108020	8918020	16034600	6517450	8565460	3	2	1.03415e+07	1.07395e+07	1.46653e+07	1.03869e+07	9.04669e+06	1.05973e+07	1.40694e+07	1.85022e+07	1.07707e+07	1.36822e+07	1.17325e+07	1.3131e+07	1.22292e+07	9.87407e+06	1.01946e+07	8.67678e+06	1.05359e+07	9.79162e+06	1.20131e+07	1.13801e+07	1.25178e+07	1.10559e+07	9.1345e+06	1.11061e+07	1.12945e+07	1.03367e+07	1.04482e+07
90	MAC_00217	6.84758	23153000	28574000	24899400	28545300	30417100	23135900	48266000	81342700	26931700	32338600	27949700	26005400	36186900	24327400	20818000	22031900	26680200	21944300	3	3	2.18394e+07	2.50291e+07	3.01357e+07	2.69258e+07	2.66435e+07	2.80013e+07	4.55277e+07	7.12513e+07	3.25953e+07	3.05039e+07	2.44822e+07	3.14742e+07	3.41339e+07	2.13093e+07	2.51959e+07	2.07819e+07	2.33702e+07	2.65591e+07	2.53696e+07	2.65223e+07	2.57229e+07	2.86599e+07	2.69022e+07	2.93457e+07	3.65482e+07	3.98064e+07	3.16194e+07
91	MAC_00228	6.60588	20954500	NA	9831220	22462900	NA	9146170	63752200	NA	29603200	30336800	NA	13569700	24479500	NA	9800110	17361900	NA	6752320	2	2	1.37145e+07	NA	1.50212e+07	1.47017e+07	NA	1.39745e+07	4.17251e+07	NA	4.5231e+07	1.98551e+07	NA	2.07333e+07	1.60216e+07	NA	1.49737e+07	1.13632e+07	NA	1.03169e+07	1.59313e+07	NA	1.28216e+07	1.56486e+07	NA	1.46455e+07	3.34956e+07	NA	4.38767e+07
92	MAC_00231	8.125	340410000	561310000	594649000	390619000	511615000	494891000	646291000	1256400000	608670000	470364000	501877000	708415000	422629000	409241000	521698000	314233000	433778000	460713000	3	16	4.14095e+08	5.06701e+08	5.4152e+08	4.75172e+08	4.61841e+08	4.50675e+08	7.86186e+08	1.13417e+09	5.54288e+08	5.72178e+08	4.5305e+08	6.45121e+08	5.14111e+08	3.69427e+08	4.75087e+08	3.82251e+08	3.91576e+08	4.1955e+08	4.81029e+08	5.3693e+08	4.62225e+08	5.05775e+08	4.66324e+08	4.72313e+08	6.31125e+08	6.33633e+08	5.37692e+08
93	MAC_00233	6.54462	4270920	14367700	18679300	4746030	17252800	15735300	5665000	32664500	17924200	5180640	14702900	19726600	5530320	13717300	13387400	4362120	14471700	15433600	3	5	9.67414e+06	9.47051e+06	1.25108e+07	1.07503e+07	1.13722e+07	1.0539e+07	1.28319e+07	2.15309e+07	1.2005e+07	1.17348e+07	9.69145e+06	1.32122e+07	1.25268e+07	9.04179e+06	8.96642e+06	9.88072e+06	9.53906e+06	1.03369e+07	1.12379e+07	1.00355e+07	1.06788e+07	1.14427e+07	1.14826e+07	1.1045e+07	1.0301e+07	1.20288e+07	1.16456e+07
94	MAC_00234	7.95957	168077000	128056000	213683000	170618000	132926000	197435000	231748000	244374000	252781000	192134000	120550000	217983000	226660000	109235000	155889000	166530000	118139000	159325000	3	8	1.51852e+08	1.61678e+08	1.8733e+08	1.54147e+08	1.67826e+08	1.73086e+08	2.09376e+08	3.08536e+08	2.21607e+08	1.73586e+08	1.52201e+08	1.911e+08	2.04779e+08	1.37915e+08	1.36664e+08	1.50454e+08	1.49157e+08	1.39676e+08	1.76397e+08	1.71323e+08	1.59899e+08	1.64075e+08	1.69455e+08	1.81396e+08	1.68081e+08	1.72372e+08	2.14971e+08
95	MAC_00235	6.60836	5831870	13037300	29021800	6124610	14624300	23751300	9324820	31858700	31198700	7127510	14371200	28474000	8123090	13668800	22164900	5383290	13201900	20854700	3	4	1.19633e+07	1.158e+07	1.5928e+07	1.25638e+07	1.29896e+07	1.30354e+07	1.91286e+07	2.82976e+07	1.71227e+07	1.46211e+07	1.27648e+07	1.56273e+07	1.66634e+07	1.21409e+07	1.21647e+07	1.10431e+07	1.17262e+07	1.14456e+07	1.3897e+07	1.22709e+07	1.35956e+07	1.33729e+07	1.31157e+07	1.36612e+07	1.53558e+07	1.58092e+07	1.661e+07
96	MAC_00236	6.89407	40679700	56483600	59415300	48674600	70262300	61534000	65032600	128664000	71462700	52690100	61761400	66303600	63367700	63330500	52551300	37520900	58027700	47966600	3	8	4.79712e+07	4.79507e+07	5.93503e+07	5.73992e+07	5.96478e+07	6.14667e+07	7.66892e+07	1.09227e+08	7.13845e+07	6.21344e+07	5.24311e+07	6.62311e+07	7.47259e+07	5.37632e+07	5.24938e+07	4.42462e+07	4.92615e+07	4.79141e+07	5.57254e+07	5.08113e+07	5.06596e+07	6.10959e+07	6.02268e+07	6.44179e+07	6.15636e+07	6.10225e+07	6.92471e+07
97	MAC_00237	7.38749	111983000	128251000	109794000	133258000	140526000	114293000	126723000	179558000	104629000	133881000	131167000	125989000	166093000	136853000	109221000	111656000	127167000	92533800	3	9	1.08436e+08	1.15153e+08	1.26282e+08	1.29037e+08	1.26175e+08	1.31457e+08	1.22709e+08	1.61221e+08	1.20342e+08	1.2964e+08	1.17772e+08	1.44909e+08	1.60832e+08	1.22877e+08	1.25623e+08	1.08119e+08	1.1418e+08	1.0643e+08	1.25963e+08	1.22023e+08	1.07791e+08	1.37347e+08	1.274e+08	1.37769e+08	9.85066e+07	9.00703e+07	1.16738e+08
98	MAC_00240	6.85303	29726300	56695800	37451000	29267300	58374400	26661500	36614500	104323000	29157600	37433700	52589800	32699200	37225100	44028800	23803900	23453600	50231900	26163400	3	4	3.52926e+07	3.66196e+07	4.8838e+07	3.47477e+07	3.77038e+07	3.47679e+07	4.34707e+07	6.73818e+07	3.8023e+07	4.44433e+07	3.39675e+07	4.26414e+07	4.41956e+07	2.8438e+07	3.10415e+07	2.78454e+07	3.24446e+07	3.41184e+07	4.09974e+07	3.88042e+07	4.16866e+07	3.69856e+07	3.80697e+07	3.64372e+07	3.48969e+07	3.76446e+07	3.68845e+07
99	MAC_00241	6.84605	28599600	39391100	NA	29326000	34977500	NA	34460600	61900300	NA	35403100	32780000	NA	37125800	28009600	NA	26716000	31268000	NA	2	3	3.31211e+07	39391100	NA	3.39624e+07	34977500	NA	3.99087e+07	61900300	NA	4.10003e+07	32780000	NA	4.29953e+07	28009600	NA	3.09397e+07	31268000	NA	3.84749e+07	4.17411e+07	NA	3.61497e+07	3.5317e+07	NA	3.20375e+07	3.45823e+07	NA
100	MAC_00242	7.76925	81647800	120756000	194339000	92560000	149063000	160725000	125573000	259555000	185669000	103253000	129348000	176468000	111046000	112923000	134159000	75229800	125530000	145624000	3	10	1.11096e+08	1.11098e+08	1.55241e+08	1.25944e+08	1.37141e+08	1.2839e+08	1.70864e+08	2.38796e+08	1.48316e+08	1.40494e+08	1.19003e+08	1.40966e+08	1.51098e+08	1.03892e+08	1.07169e+08	1.02363e+08	1.1549e+08	1.16327e+08	1.29054e+08	1.17726e+08	1.32509e+08	1.34055e+08	1.38472e+08	1.34554e+08	1.37164e+08	1.3341e+08	1.43875e+08
101	MAC_00245	7.05497	89034900	131319000	161037000	91307100	112089000	137201000	128891000	249204000	149621000	115578000	108137000	178997000	111104000	98486500	133251000	73567300	102909000	135383000	3	19	1.09838e+08	1.28255e+08	1.33656e+08	1.12641e+08	1.09474e+08	1.13873e+08	1.59006e+08	2.43389e+08	1.24181e+08	1.42583e+08	1.05614e+08	1.48562e+08	1.37063e+08	9.61885e+07	1.10594e+08	9.07563e+07	1.00508e+08	1.12364e+08	1.27592e+08	1.35906e+08	1.14084e+08	1.19895e+08	1.10536e+08	1.1934e+08	1.27645e+08	1.35976e+08	1.20463e+08
102	MAC_00246	7.01395	NA	58624000	26810400	NA	61417900	19413000	NA	78094000	22467200	NA	49455700	25838600	NA	40593100	17455300	NA	42496200	26009400	2	3	NA	58624000	6.34005e+07	NA	61417900	4.59073e+07	NA	7.8094e+07	5.31298e+07	NA	4.94557e+07	6.11024e+07	NA	40593100	4.12778e+07	NA	42496200	6.15063e+07	NA	6.21214e+07	5.41167e+07	NA	6.20141e+07	4.81114e+07	NA	4.36293e+07	5.1539e+07
103	MAC_00251	7.03723	83361900	147402000	99233400	96108500	145176000	83487800	116825000	251688000	90095300	100311000	126997000	94550800	107860000	115997000	70684800	81388800	127100000	74854100	3	13	9.16827e+07	1.06796e+08	1.24533e+08	1.05702e+08	1.05183e+08	1.04773e+08	1.28486e+08	1.82354e+08	1.13066e+08	1.10324e+08	9.20122e+07	1.18657e+08	1.18626e+08	8.40425e+07	8.87062e+07	8.95127e+07	9.20868e+07	9.39385e+07	1.06502e+08	1.13167e+08	1.06298e+08	1.12509e+08	1.06204e+08	1.09804e+08	1.03144e+08	1.01877e+08	1.0968e+08
104	MAC_00253	6.9198	32883000	77512400	94787600	33203100	79734800	78442100	46161900	155164000	81318400	39308200	62060200	93605300	41731100	55141500	73659800	25398500	58867200	77982200	3	10	5.59407e+07	6.20625e+07	6.95883e+07	5.64853e+07	6.3842e+07	5.75883e+07	7.85309e+07	1.24237e+08	5.96999e+07	6.68713e+07	4.96903e+07	6.87203e+07	7.09932e+07	4.41506e+07	5.40774e+07	4.32081e+07	4.71337e+07	5.72506e+07	6.49831e+07	6.5765e+07	5.93985e+07	6.01232e+07	6.44617e+07	6.03532e+07	6.30421e+07	6.94081e+07	5.79124e+07
105	MAC_00254	6.93728	60697900	40810400	38437800	70781000	49117400	34197900	88516700	85940100	38009400	78841000	45091300	40206600	85300700	37537900	29394100	56027700	41019800	31498100	3	5	4.15375e+07	4.22456e+07	5.42601e+07	4.84377e+07	5.08448e+07	4.82749e+07	6.05748e+07	8.89625e+07	5.36554e+07	5.39534e+07	4.66771e+07	5.6757e+07	5.8374e+07	3.8858e+07	4.14937e+07	3.83415e+07	4.24624e+07	4.44638e+07	4.82517e+07	4.47659e+07	4.63148e+07	5.15573e+07	5.13383e+07	5.05927e+07	4.86275e+07	4.97013e+07	5.20488e+07
106	MAC_00255	7.18112	34411300	78525100	17878200	32611600	68787700	13997000	40233100	96768400	12725300	38451200	61024200	17287900	42486200	55006000	13216900	32752000	58706900	16181600	3	7	3.15351e+07	3.85006e+07	3.97898e+07	2.98858e+07	3.37264e+07	3.11518e+07	3.68703e+07	4.74452e+07	2.83215e+07	3.52373e+07	2.992e+07	3.8476e+07	3.8935e+07	2.69693e+07	2.94156e+07	3.00145e+07	2.87838e+07	3.60139e+07	3.66325e+07	4.07975e+07	3.39634e+07	3.18106e+07	3.40538e+07	3.26475e+07	2.95983e+07	2.65066e+07	2.74735e+07
107	MAC_00256	7.18249	74575800	119973000	136663000	86251500	126511000	115413000	108027000	218902000	111408000	98999700	105848000	130053000	104237000	94904200	91765700	77404900	110969000	113614000	3	11	8.98555e+07	1.05353e+08	1.29164e+08	1.03923e+08	1.11094e+08	1.0908e+08	1.3016e+08	1.92226e+08	1.05295e+08	1.19284e+08	9.2949e+07	1.22917e+08	1.25594e+08	8.33388e+07	8.67305e+07	9.32643e+07	9.74459e+07	1.0738e+08	1.0438e+08	1.11638e+08	1.10251e+08	1.10616e+08	1.12172e+08	1.14317e+08	1.04489e+08	1.07392e+08	1.02142e+08
108	MAC_00273	7.01607	26499500	NA	33088800	28453400	NA	26893300	41459600	NA	32036500	32635700	NA	32036400	34512100	NA	23718900	27366300	NA	23505000	2	2	2.51278e+07	NA	3.48952e+07	2.69805e+07	NA	2.83614e+07	3.93134e+07	NA	3.37854e+07	3.09463e+07	NA	3.37853e+07	3.27256e+07	NA	2.50137e+07	2.59497e+07	NA	2.47882e+07	2.91894e+07	NA	2.97854e+07	2.87182e+07	NA	2.97231e+07	3.15596e+07	NA	3.27738e+07
109	MAC_00275	7.6037	199020000	227403000	220516000	239889000	246243000	192207000	339896000	505853000	219294000	257648000	221317000	223751000	270407000	202186000	164669000	196898000	220709000	170245000	3	19	1.87105e+08	2.058e+08	2.59181e+08	2.25527e+08	2.2285e+08	2.25908e+08	3.19546e+08	4.57798e+08	2.57745e+08	2.42223e+08	2.00292e+08	2.62983e+08	2.54218e+08	1.82979e+08	1.93542e+08	1.8511e+08	1.99742e+08	2.00096e+08	2.17349e+08	2.18078e+08	2.21229e+08	2.40052e+08	2.25013e+08	2.36755e+08	2.56521e+08	2.55761e+08	2.50027e+08
110	MAC_00276	7.18252	NA	26020400	37819100	NA	29990700	30598300	NA	45236700	37991500	NA	24395800	34655900	NA	22723500	27712000	NA	23496000	29255900	2	3	NA	26020400	3.20761e+07	NA	29990700	2.59518e+07	NA	45236700	3.22223e+07	NA	24395800	2.93932e+07	NA	22723500	2.35038e+07	NA	23496000	2.48133e+07	NA	2.75727e+07	2.73792e+07	NA	3.02818e+07	2.71978e+07	NA	2.52727e+07	3.12575e+07
111	MAC_00279	7.54268	95540700	127629000	223375000	113871000	126655000	200259000	164644000	290963000	226412000	137963000	125181000	244325000	148592000	126066000	190823000	70529200	98975400	131344000	3	14	1.20773e+08	1.35601e+08	1.66318e+08	1.43944e+08	1.34567e+08	1.49106e+08	2.08126e+08	3.09138e+08	1.68579e+08	1.74399e+08	1.33e+08	1.81917e+08	1.87835e+08	1.33941e+08	1.42081e+08	8.91559e+07	1.05158e+08	9.77945e+07	1.40295e+08	1.43691e+08	1.41964e+08	1.53215e+08	1.35873e+08	1.56265e+08	1.67077e+08	1.72708e+08	1.63532e+08
112	MAC_00280	8.01345	238259000	432478000	345054000	249283000	435132000	279387000	404333000	880027000	304232000	295002000	349714000	362547000	310379000	311150000	253252000	211477000	351781000	276922000	3	14	2.82798e+08	3.3212e+08	3.78555e+08	2.95883e+08	3.34158e+08	3.06512e+08	4.79917e+08	6.75814e+08	3.3377e+08	3.50148e+08	2.68562e+08	3.97746e+08	3.684e+08	2.38947e+08	2.7784e+08	2.51009e+08	2.70149e+08	3.03808e+08	3.2851e+08	3.51934e+08	3.23123e+08	3.14939e+08	3.37402e+08	3.21229e+08	3.85262e+08	3.77562e+08	3.23776e+08
113	MAC_00281	7.77871	116182000	136381000	275770000	138883000	130620000	245676000	201652000	263372000	280499000	162596000	123572000	256141000	163109000	108336000	192152000	112537000	113537000	208525000	3	11	1.34918e+08	1.66738e+08	1.94239e+08	1.61279e+08	1.59695e+08	1.73042e+08	2.34171e+08	3.21997e+08	1.97569e+08	1.88816e+08	1.51078e+08	1.80413e+08	1.89412e+08	1.32451e+08	1.35342e+08	1.30685e+08	1.38809e+08	1.46875e+08	1.56726e+08	1.76686e+08	1.65796e+08	1.71666e+08	1.61245e+08	1.8135e+08	1.87985e+08	1.79892e+08	1.91654e+08
114	MAC_00282	8.08906	354293000	473178000	869486000	397005000	492697000	621483000	540172000	899341000	665938000	458545000	454461000	777887000	449806000	397696000	584424000	333793000	434562000	573554000	3	22	4.43288e+08	4.89034e+08	6.72395e+08	4.96729e+08	5.09207e+08	4.80608e+08	6.75858e+08	9.29478e+08	5.14986e+08	5.73727e+08	4.6969e+08	6.01559e+08	5.62793e+08	4.11023e+08	4.5195e+08	4.17639e+08	4.49124e+08	4.43544e+08	5.14942e+08	5.18209e+08	5.73936e+08	5.2872e+08	5.1415e+08	5.03683e+08	5.42557e+08	5.19278e+08	4.99567e+08
115	MAC_00286	7.22242	87343300	137975000	222373000	96592500	156510000	178978000	120982000	232741000	177989000	113042000	135093000	210280000	119252000	121519000	152135000	83589900	140965000	185454000	3	18	1.21304e+08	1.30308e+08	1.69537e+08	1.3415e+08	1.47813e+08	1.36453e+08	1.68022e+08	2.19808e+08	1.35699e+08	1.56995e+08	1.27586e+08	1.60317e+08	1.6562e+08	1.14767e+08	1.15988e+08	1.16091e+08	1.33132e+08	1.4139e+08	1.40912e+08	1.38082e+08	1.44712e+08	1.42789e+08	1.49248e+08	1.43004e+08	1.34883e+08	1.22802e+08	1.31636e+08
116	MAC_00289	6.35129	9699040	32411300	12163400	11689600	35849200	9806050	17330200	63266500	11715800	13432000	28661700	11824200	13862400	29976200	8725490	9350490	31638600	9457920	3	4	1.3129e+07	1.51745e+07	1.91926e+07	1.58235e+07	1.67841e+07	1.5473e+07	2.34588e+07	2.96205e+07	1.84864e+07	1.8182e+07	1.3419e+07	1.86574e+07	1.87646e+07	1.40344e+07	1.3768e+07	1.26572e+07	1.48128e+07	1.49237e+07	1.52512e+07	1.60798e+07	1.63822e+07	1.68426e+07	1.6947e+07	1.62159e+07	1.8832e+07	1.65483e+07	1.79329e+07
117	MAC_00290	6.77433	9503700	20666200	39628700	10474300	18349900	34341900	14693600	32154700	37165100	12625800	18203000	35941100	12033600	13071100	26851000	10776900	19515300	28143000	3	4	1.61237e+07	2.0696e+07	2.33246e+07	1.77703e+07	1.83763e+07	2.02129e+07	2.49287e+07	3.2201e+07	2.18746e+07	2.14205e+07	1.82292e+07	2.11542e+07	2.04158e+07	1.30899e+07	1.58039e+07	1.82837e+07	1.95434e+07	1.65644e+07	1.87299e+07	2.19306e+07	1.99092e+07	1.89148e+07	1.85547e+07	2.11834e+07	2.00119e+07	1.799e+07	2.12196e+07
118	MAC_00292	7.53997	63016000	89510800	123956000	68480200	97028800	101952000	94369100	167748000	116576000	79822000	81533800	114949000	81334300	72236500	80701300	59506500	87241400	97674300	3	6	7.73887e+07	8.47607e+07	1.06591e+08	8.40991e+07	9.18797e+07	8.76698e+07	1.15893e+08	1.58846e+08	1.00245e+08	9.80278e+07	7.7207e+07	9.88461e+07	9.9885e+07	6.84031e+07	6.93961e+07	7.30787e+07	8.26117e+07	8.39914e+07	8.98979e+07	8.98173e+07	9.09831e+07	8.95154e+07	9.27716e+07	9.18791e+07	9.3035e+07	8.87436e+07	9.72437e+07
119	MAC_00293	7.42178	59392800	142850000	267885000	60514600	146422000	243115000	87413900	328776000	303178000	72325900	133404000	275522000	72649500	119093000	208297000	52184500	130504000	210674000	3	20	1.22535e+08	1.25778e+08	1.47468e+08	1.2485e+08	1.28923e+08	1.33832e+08	1.80346e+08	2.89483e+08	1.66897e+08	1.49218e+08	1.17461e+08	1.51672e+08	1.49886e+08	1.0486e+08	1.14665e+08	1.07664e+08	1.14907e+08	1.15974e+08	1.42342e+08	1.33281e+08	1.25874e+08	1.3289e+08	1.30174e+08	1.40258e+08	1.44776e+08	1.61728e+08	1.61899e+08
120	MAC_00308	6.82825	31566800	46079700	49568200	40262200	56649800	45073100	54207600	108310000	47618100	45700700	54495900	54100100	45441400	47106900	38895600	30713200	49229600	37777100	3	8	3.67783e+07	3.78597e+07	5.17816e+07	4.69092e+07	4.65442e+07	4.70858e+07	6.31569e+07	8.89888e+07	4.97444e+07	5.32456e+07	4.47745e+07	5.65158e+07	5.29435e+07	3.87036e+07	4.06324e+07	3.57838e+07	4.04476e+07	3.9464e+07	4.27232e+07	4.01183e+07	4.41992e+07	4.99304e+07	4.6996e+07	4.93465e+07	5.07003e+07	4.9716e+07	4.8255e+07
121	MAC_00312	7.26733	155609000	131996000	56311600	144387000	121867000	36586400	147933000	191152000	36622900	160364000	114089000	46390600	187580000	113713000	37976500	139006000	133018000	41766100	3	7	9.54986e+07	9.5108e+07	1.27344e+08	8.86115e+07	8.78097e+07	8.27373e+07	9.07878e+07	1.37732e+08	8.28198e+07	9.84168e+07	8.22054e+07	1.04909e+08	1.15119e+08	8.19344e+07	8.58809e+07	8.53092e+07	9.58444e+07	9.44507e+07	1.10935e+08	1.00782e+08	1.08697e+08	9.43185e+07	8.8662e+07	8.67097e+07	7.28815e+07	7.69478e+07	8.034e+07
122	MAC_00314	7.59836	72136400	109798000	195096000	80073100	137871000	173008000	115462000	258187000	198107000	93248500	119954000	201273000	98589800	107643000	147881000	71085800	113820000	156905000	3	10	1.05545e+08	1.04527e+08	1.40065e+08	1.17157e+08	1.31253e+08	1.24207e+08	1.68936e+08	2.45793e+08	1.42227e+08	1.36435e+08	1.14196e+08	1.445e+08	1.4425e+08	1.02476e+08	1.06168e+08	1.04008e+08	1.08356e+08	1.12647e+08	1.22605e+08	1.10763e+08	1.19555e+08	1.24703e+08	1.32527e+08	1.30171e+08	1.35616e+08	1.37319e+08	1.37968e+08
123	MAC_00316	7.43669	49912500	96818600	139262000	36853200	74215400	74606100	48941700	153320000	70615500	46517000	85328100	85386700	54190000	72816400	55134500	49909000	98215500	83675100	3	6	7.49711e+07	7.36315e+07	1.21911e+08	5.53554e+07	5.64415e+07	6.53108e+07	7.35129e+07	1.16601e+08	6.18174e+07	6.98709e+07	6.48928e+07	7.47482e+07	8.13961e+07	5.53776e+07	4.82652e+07	7.49659e+07	7.46938e+07	7.32499e+07	8.70896e+07	7.80241e+07	1.0406e+08	5.89205e+07	5.69894e+07	6.84465e+07	5.90138e+07	6.51425e+07	5.99665e+07
124	MAC_00320	8.18992	212096000	142902000	364476000	233966000	146231000	316793000	305818000	248244000	335869000	262557000	119310000	385850000	275157000	103884000	271599000	208808000	117305000	304842000	3	12	1.92721e+08	2.29334e+08	2.49944e+08	2.12593e+08	2.34676e+08	2.17245e+08	2.77881e+08	3.9839e+08	2.30326e+08	2.38572e+08	1.91473e+08	2.64601e+08	2.50021e+08	1.66716e+08	1.86252e+08	1.89733e+08	1.88255e+08	2.09049e+08	2.23873e+08	2.43015e+08	2.13344e+08	2.26285e+08	2.36954e+08	2.27675e+08	2.23074e+08	2.22571e+08	2.2343e+08
125	MAC_00329	6.66815	37499500	59567000	NA	38041700	61916100	NA	45519300	108804000	NA	36888500	58830700	NA	50554300	62284800	NA	35776800	59710700	NA	2	2	6.19183e+07	59567000	NA	6.28136e+07	6.19161e+07	NA	7.51604e+07	108804000	NA	6.09094e+07	5.88307e+07	NA	8.34741e+07	62284800	NA	5.90738e+07	59710700	NA	7.19269e+07	6.31206e+07	NA	6.6859e+07	6.25171e+07	NA	6.03363e+07	6.07863e+07	NA
126	MAC_00333	8.00367	320254000	447733000	770071000	342431000	469395000	618977000	508652000	950949000	645495000	413306000	413881000	791261000	416462000	361145000	607894000	273258000	395445000	595030000	3	19	4.23222e+08	4.60452e+08	5.6662e+08	4.52529e+08	4.8273e+08	4.55444e+08	6.72194e+08	9.77963e+08	4.74956e+08	5.46192e+08	4.25638e+08	5.82211e+08	5.50363e+08	3.71404e+08	4.4729e+08	3.61116e+08	4.06679e+08	4.37824e+08	4.91632e+08	4.87922e+08	4.83649e+08	4.81674e+08	4.87415e+08	4.77311e+08	5.39615e+08	5.46366e+08	4.60735e+08
127	MAC_00335	6.8062	12861400	52407400	58357600	14057000	63724400	44870100	19173800	114264000	48310900	17011300	54194100	53536600	17822600	49351000	42779000	12417000	58551400	45955500	3	10	3.01867e+07	3.01849e+07	4.31692e+07	3.29928e+07	3.67031e+07	3.3192e+07	4.50023e+07	6.58122e+07	3.57373e+07	3.99268e+07	3.1214e+07	3.96029e+07	4.1831e+07	2.84245e+07	3.16451e+07	2.91436e+07	3.37236e+07	3.39949e+07	3.50661e+07	3.19857e+07	3.68479e+07	3.51177e+07	3.70594e+07	3.47856e+07	3.61264e+07	3.67678e+07	3.46672e+07
128	MAC_00336	7.24632	26894900	NA	62826400	40684900	NA	69655800	48068100	NA	63345600	36180000	NA	70511200	42160000	NA	54194700	23866600	NA	60247100	2	3	3.60225e+07	NA	4.69071e+07	5.44926e+07	NA	5.2006e+07	6.43815e+07	NA	4.72947e+07	4.84588e+07	NA	5.26446e+07	5.64683e+07	NA	4.04625e+07	3.19665e+07	NA	4.49813e+07	4.18452e+07	NA	4.00384e+07	5.80021e+07	NA	5.45029e+07	5.16834e+07	NA	4.58786e+07
129	MAC_00337	7.33543	48615400	70331400	53575400	54581300	76987500	28215600	66351700	141062000	37144300	63195000	73503400	55068100	80878000	61265200	40753600	53690000	72635500	38529000	3	4	4.68791e+07	5.15734e+07	7.57676e+07	5.26319e+07	5.64543e+07	3.99032e+07	6.3982e+07	1.0344e+08	5.25303e+07	6.0938e+07	5.38994e+07	7.78786e+07	7.79894e+07	4.49252e+07	5.76347e+07	5.17725e+07	5.3263e+07	5.44886e+07	5.44567e+07	5.46501e+07	6.46729e+07	5.60216e+07	5.70022e+07	4.1819e+07	5.13626e+07	5.77893e+07	5.09575e+07
130	MAC_00339	7.21706	39237300	42936900	34659200	43144500	48005700	35034300	53040800	77301700	30317300	50345100	39192700	34791800	52524600	33631400	26526400	37404900	36199700	32551400	3	7	3.46485e+07	3.89106e+07	4.33108e+07	3.80987e+07	4.35041e+07	4.37795e+07	4.68376e+07	7.0053e+07	3.78851e+07	4.44572e+07	3.55175e+07	4.34765e+07	4.63818e+07	3.04777e+07	3.31479e+07	3.30304e+07	3.28052e+07	4.06768e+07	4.02491e+07	4.12319e+07	3.69688e+07	4.05524e+07	4.39264e+07	4.58815e+07	3.75997e+07	3.9137e+07	3.67507e+07
131	MAC_00341	7.61869	265158000	339502000	532601000	311601000	337097000	429288000	409944000	641474000	458538000	354746000	298991000	498353000	342587000	255446000	380368000	253904000	301635000	412465000	3	34	3.05359e+08	3.60836e+08	4.3514e+08	3.58843e+08	3.5828e+08	3.50733e+08	4.72096e+08	6.81783e+08	3.7463e+08	4.08529e+08	3.17779e+08	4.07159e+08	3.94527e+08	2.71498e+08	3.10764e+08	2.92398e+08	3.20589e+08	3.36988e+08	3.54717e+08	3.82362e+08	3.71422e+08	3.81954e+08	3.61757e+08	3.67572e+08	3.78983e+08	3.80897e+08	3.63413e+08
132	MAC_00342	6.98077	11895500	19499200	45145600	11518400	20626100	44877100	15412900	33392900	49083000	14781900	17327600	49274800	16029400	15541600	33883100	10442800	14257400	39049100	3	4	2.00673e+07	2.24603e+07	2.32333e+07	1.94311e+07	2.37584e+07	2.30951e+07	2.6001e+07	3.84639e+07	2.52596e+07	2.49365e+07	1.9959e+07	2.53583e+07	2.7041e+07	1.79017e+07	1.74372e+07	1.76166e+07	1.64225e+07	2.00958e+07	2.3311e+07	2.38003e+07	1.98312e+07	2.06826e+07	2.3989e+07	2.42039e+07	2.08728e+07	2.14889e+07	2.45032e+07
133	MAC_00347	7.43979	105084000	183385000	168965000	105752000	218764000	138162000	140614000	387399000	133798000	114062000	192859000	153330000	133598000	174790000	107109000	93031600	198086000	126800000	3	9	1.38147e+08	1.26976e+08	1.85625e+08	1.39025e+08	1.51472e+08	1.51785e+08	1.84855e+08	2.68235e+08	1.46991e+08	1.49949e+08	1.33535e+08	1.68448e+08	1.75632e+08	1.21024e+08	1.1767e+08	1.22302e+08	1.37155e+08	1.39303e+08	1.60477e+08	1.34551e+08	1.58444e+08	1.47978e+08	1.52942e+08	1.59072e+08	1.48396e+08	1.49857e+08	1.42589e+08
134	MAC_00350	7.16514	41241100	70108500	45884500	40246800	68509900	33986700	44387000	123727000	37740100	41188600	74001200	40678300	55045000	71445900	31429200	38377100	74023000	32743300	3	4	4.77428e+07	4.46068e+07	6.22957e+07	4.65918e+07	4.35896e+07	4.61425e+07	5.13847e+07	7.87217e+07	5.12384e+07	4.7682e+07	4.70835e+07	5.52275e+07	6.37229e+07	4.54577e+07	4.26703e+07	4.44273e+07	4.70974e+07	4.44544e+07	5.546e+07	4.72679e+07	5.31737e+07	4.95924e+07	4.40127e+07	4.83579e+07	4.12499e+07	4.398e+07	4.97042e+07
135	MAC_00351	8.89298	626807000	1293880000	2231980000	627224000	1122110000	1609930000	762232000	1732500000	1851560000	769090000	1166290000	2346330000	825164000	1043020000	1626990000	522799000	1075890000	1646550000	3	11	1.065e+09	1.22682e+09	1.38545e+09	1.06571e+09	1.06395e+09	9.99325e+08	1.2951e+09	1.6427e+09	1.14931e+09	1.30675e+09	1.10584e+09	1.45643e+09	1.40202e+09	9.88959e+08	1.00991e+09	8.88279e+08	1.02013e+09	1.02206e+09	1.23714e+09	1.30001e+09	1.18258e+09	1.13434e+09	1.07428e+09	1.04731e+09	1.03966e+09	9.1774e+08	1.1149e+09
136	MAC_00353	7.46635	70780600	94193600	149821000	66424000	99364200	106213000	80225100	147307000	108715000	71250700	83095000	121328000	92569800	85454200	89720400	66916300	95665200	97481700	3	4	8.9024e+07	8.88345e+07	1.26305e+08	8.35445e+07	9.37109e+07	8.95416e+07	1.00903e+08	1.38926e+08	9.16509e+07	8.96153e+07	7.83673e+07	1.02284e+08	1.16429e+08	8.05923e+07	7.56377e+07	8.41637e+07	9.02223e+07	8.21808e+07	1.03414e+08	9.41341e+07	1.0781e+08	8.89251e+07	9.46205e+07	9.38407e+07	8.10015e+07	7.76147e+07	8.89066e+07
137	MAC_00354	8.253	249789000	354163000	405640000	285447000	412984000	362789000	495056000	989933000	479002000	333513000	353295000	429434000	330999000	302799000	299899000	212843000	319113000	314972000	3	15	2.95464e+08	3.11121e+08	3.90377e+08	3.37642e+08	3.62793e+08	3.49138e+08	5.85578e+08	8.69625e+08	4.60978e+08	3.94497e+08	3.10358e+08	4.13276e+08	3.91523e+08	2.65999e+08	2.88615e+08	2.51762e+08	2.80331e+08	3.0312e+08	3.43223e+08	3.29682e+08	3.33214e+08	3.59387e+08	3.66315e+08	3.65901e+08	4.70083e+08	4.85839e+08	4.47176e+08
138	MAC_00356	7.97783	258612000	274047000	629455000	267913000	286934000	495620000	388865000	544830000	539119000	337084000	266141000	603532000	350315000	254947000	424872000	202449000	247797000	410391000	3	16	3.12818e+08	3.25366e+08	4.38303e+08	3.24068e+08	3.40667e+08	3.45111e+08	4.70372e+08	6.46857e+08	3.754e+08	4.07738e+08	3.1598e+08	4.20252e+08	4.23742e+08	3.0269e+08	2.95847e+08	2.44883e+08	2.94201e+08	2.85764e+08	3.63382e+08	3.44777e+08	3.74122e+08	3.4494e+08	3.43973e+08	3.6168e+08	3.776e+08	3.61384e+08	3.6416e+08
139	MAC_00357	6.92338	20868400	39232800	NA	22816000	42743000	NA	32073000	77477400	NA	26558500	37617900	NA	26831200	33125500	NA	17651800	37733700	NA	2	5	3.71451e+07	39232800	NA	4.06118e+07	42743000	NA	5.7089e+07	77477400	NA	4.72733e+07	37617900	NA	4.77587e+07	33125500	NA	3.14197e+07	37733700	NA	4.31493e+07	4.15733e+07	NA	4.32273e+07	4.31579e+07	NA	4.58292e+07	4.32848e+07	NA
140	MAC_00358	6.99777	25082100	64953100	35926900	25524700	73961200	36548200	33735300	124220000	32273600	30175800	63627500	40433100	31378900	59130500	25809900	24346000	62281200	33956700	3	4	3.64776e+07	3.69133e+07	4.34684e+07	3.71213e+07	4.20327e+07	4.42202e+07	4.90622e+07	7.05951e+07	3.90483e+07	4.38855e+07	3.616e+07	4.89206e+07	4.56352e+07	3.36043e+07	3.12277e+07	3.54071e+07	3.53949e+07	4.10847e+07	4.23739e+07	3.91155e+07	3.71033e+07	3.9512e+07	4.24407e+07	4.63433e+07	3.93856e+07	3.94399e+07	3.78791e+07
141	MAC_00360	6.79768	41474600	23852300	19892600	46751700	25158400	18503600	59650500	41713400	18121900	52567500	21005300	20049200	57187300	19717200	14712500	38865100	22631900	17618600	3	5	2.37709e+07	2.68653e+07	3.08153e+07	2.67955e+07	2.83364e+07	2.86636e+07	3.41883e+07	4.69826e+07	2.80723e+07	3.01288e+07	2.36587e+07	3.10579e+07	3.27766e+07	2.22079e+07	2.27909e+07	2.22753e+07	2.54908e+07	2.72927e+07	2.76133e+07	2.8468e+07	2.6303e+07	2.85212e+07	2.86114e+07	3.00398e+07	2.74453e+07	2.62481e+07	2.72318e+07
142	MAC_00361	7.37223	116797000	148773000	241937000	132619000	155137000	216756000	183305000	294360000	242015000	149897000	138983000	235474000	155231000	122944000	170282000	110354000	140486000	190334000	3	11	1.41015e+08	1.57067e+08	1.89805e+08	1.60118e+08	1.63785e+08	1.7005e+08	2.21314e+08	3.1077e+08	1.89866e+08	1.80979e+08	1.46731e+08	1.84735e+08	1.87419e+08	1.29798e+08	1.3359e+08	1.33236e+08	1.48318e+08	1.49321e+08	1.63809e+08	1.66437e+08	1.62012e+08	1.7043e+08	1.65375e+08	1.78215e+08	1.77664e+08	1.7362e+08	1.84181e+08
143	MAC_00366	6.80399	12383900	10328500	63485500	15106500	11795200	58799300	21282700	22675300	61612300	16652100	10296400	68792500	16399000	9550880	44901000	13089500	9989270	54331700	3	5	1.75232e+07	1.92639e+07	2.40554e+07	2.13757e+07	2.19994e+07	2.22797e+07	3.0115e+07	4.22921e+07	2.33456e+07	2.35627e+07	1.9204e+07	2.60663e+07	2.32046e+07	1.78135e+07	1.70135e+07	1.85216e+07	1.86311e+07	2.05869e+07	2.03557e+07	2.04131e+07	2.0533e+07	2.27523e+07	2.2213e+07	2.33495e+07	2.41753e+07	2.36276e+07	2.26466e+07
144	MAC_00371	6.76667	18752000	28283600	45926100	20176700	30595800	43549000	29521700	61756500	53595400	24327900	29899900	49515900	22276800	26287600	36741500	16096600	25346000	37975000	3	8	2.72415e+07	2.75828e+07	3.24169e+07	2.93112e+07	2.98378e+07	3.0739e+07	4.2887e+07	6.02264e+07	3.78303e+07	3.53418e+07	2.91591e+07	3.49507e+07	3.23621e+07	2.56363e+07	2.59339e+07	2.3384e+07	2.4718e+07	2.68046e+07	3.16449e+07	2.92284e+07	2.76701e+07	3.1199e+07	3.01274e+07	3.22149e+07	3.44283e+07	3.36471e+07	3.66975e+07
145	MAC_00373	7.22076	38713200	66263000	69743100	33638900	56878400	55395800	47656400	110903000	63917100	43093200	52155100	61927600	49364900	49600200	46694300	30650300	55004200	50266200	3	5	5.07422e+07	5.54931e+07	6.35364e+07	4.40912e+07	4.76338e+07	5.04659e+07	6.24643e+07	9.28777e+07	5.82289e+07	5.64832e+07	4.36782e+07	5.64164e+07	6.47037e+07	4.15386e+07	4.25388e+07	4.0174e+07	4.60643e+07	4.57928e+07	5.89443e+07	5.88037e+07	5.42327e+07	4.69309e+07	4.80962e+07	5.28889e+07	5.01443e+07	5.18886e+07	5.64854e+07
146	MAC_00374	6.66371	30266900	20465600	33337000	28360300	21334300	22042400	32178900	34794600	21204900	34591800	18604500	28616400	34238100	19032400	22101900	34003300	21148100	23848000	3	5	2.44594e+07	2.4185e+07	3.49082e+07	2.29187e+07	2.52115e+07	2.30813e+07	2.60046e+07	4.11181e+07	2.22043e+07	2.79545e+07	2.19856e+07	2.99651e+07	2.76686e+07	2.24913e+07	2.31436e+07	2.74789e+07	2.49915e+07	2.4972e+07	2.84131e+07	2.56278e+07	2.97966e+07	2.43947e+07	2.54563e+07	2.41895e+07	2.08756e+07	2.29717e+07	2.15395e+07
147	MAC_00382	7.27008	90529900	161636000	100474000	98767100	172874000	82706200	149608000	378411000	99168700	115074000	155718000	99863000	117688000	142028000	74732400	79923900	156049000	75322000	3	11	1.01661e+08	1.06004e+08	1.36429e+08	1.10911e+08	1.13374e+08	1.12303e+08	1.68003e+08	2.4817e+08	1.34656e+08	1.29223e+08	1.02123e+08	1.35599e+08	1.32158e+08	9.3145e+07	1.01476e+08	8.97509e+07	1.0234e+08	1.02276e+08	1.18094e+08	1.12328e+08	1.16451e+08	1.18054e+08	1.14475e+08	1.17695e+08	1.34867e+08	1.38647e+08	1.30625e+08
148	MAC_00383	7.08343	24701200	53094000	NA	24119200	50073000	NA	28763200	91213300	NA	27557000	53223100	NA	36647800	50856400	NA	22938700	46916100	NA	2	2	5.10117e+07	53094000	NA	4.98097e+07	50073000	NA	5.94003e+07	9.12133e+07	NA	5.69093e+07	5.32231e+07	NA	7.56832e+07	5.08564e+07	NA	4.73718e+07	46916100	NA	5.92573e+07	5.62615e+07	NA	5.30177e+07	5.0559e+07	NA	4.76846e+07	5.09588e+07	NA
149	MAC_00384	6.95956	10266600	20112000	63566400	10707100	17660600	51505400	13070700	34643900	63865900	11400800	15395000	64241400	11389900	14019600	48245000	9202460	15376900	53640200	3	4	2.12388e+07	2.45343e+07	2.51887e+07	2.21501e+07	2.15438e+07	2.04095e+07	2.70397e+07	4.22615e+07	2.53074e+07	2.35852e+07	1.87801e+07	2.54562e+07	2.35626e+07	1.71023e+07	1.91175e+07	1.90374e+07	1.8758e+07	2.12554e+07	2.46719e+07	2.59979e+07	2.15003e+07	2.35766e+07	2.1753e+07	2.13894e+07	2.17066e+07	2.36105e+07	2.45496e+07
150	MAC_00385	6.91574	8363250	9793960	54369700	10339800	13636700	58315300	13285000	24807300	65554900	9549260	11364500	57204700	12807800	12569100	48097600	6587790	10277900	36795100	3	3	1.60119e+07	1.4221e+07	1.95576e+07	1.97961e+07	1.98008e+07	2.09769e+07	2.54349e+07	3.60207e+07	2.35811e+07	1.82826e+07	1.65015e+07	2.05774e+07	2.45213e+07	1.82506e+07	1.73014e+07	1.26127e+07	1.49237e+07	1.32358e+07	1.86001e+07	1.50694e+07	1.66938e+07	2.10711e+07	1.9993e+07	2.19841e+07	2.04183e+07	2.01239e+07	2.2875e+07
151	MAC_00388	6.62615	8368990	11489600	NA	10706900	10179500	NA	15027200	21979100	NA	11982400	10912500	NA	12896500	9048420	NA	9020750	9713230	NA	2	2	8.75813e+06	11489600	NA	1.12047e+07	10179500	NA	1.57259e+07	21979100	NA	1.25395e+07	10912500	NA	1.34962e+07	9.04842e+06	NA	9.44019e+06	9.71323e+06	NA	1.01738e+07	1.2175e+07	NA	1.19264e+07	1.02783e+07	NA	1.26243e+07	1.22792e+07	NA
152	MAC_00391	6.81327	9892330	36006800	18386200	12320000	40107700	19709900	15510400	60638300	15319400	15132500	31916100	15976100	14935300	30309200	12059600	9849300	34198000	17421100	3	3	1.54476e+07	1.8922e+07	2.24052e+07	1.92386e+07	2.1077e+07	2.40182e+07	2.42206e+07	3.18661e+07	1.8668e+07	2.36305e+07	1.67723e+07	1.94683e+07	2.33225e+07	1.59278e+07	1.46957e+07	1.53804e+07	1.79714e+07	2.12291e+07	1.79446e+07	2.00508e+07	1.91244e+07	2.04776e+07	2.12816e+07	2.51714e+07	1.94435e+07	1.78028e+07	1.8109e+07
153	MAC_00393	6.98681	38639400	82516500	111508000	42708100	83465800	87629000	54417600	125157000	80032200	45581700	69768300	100675000	50920200	66017300	74597000	36274300	74612800	87969700	3	12	5.99044e+07	6.94155e+07	8.54992e+07	6.62123e+07	7.02141e+07	6.71898e+07	8.4366e+07	1.05286e+08	6.1365e+07	7.06673e+07	5.86913e+07	7.71929e+07	7.89439e+07	5.55359e+07	5.71975e+07	5.62377e+07	6.27667e+07	6.74511e+07	6.95874e+07	7.35567e+07	7.29794e+07	7.04766e+07	7.08957e+07	7.04158e+07	6.77263e+07	5.88209e+07	5.95276e+07
154	MAC_00394	6.68361	53968900	66034500	25215600	47189100	55466800	21181700	53865800	70000000	19655800	63931000	51322100	19661200	73483400	51858800	16577000	39542700	42398500	23994800	3	8	3.95154e+07	4.73377e+07	4.80408e+07	3.45513e+07	3.97621e+07	4.03554e+07	3.94399e+07	5.01805e+07	3.74483e+07	4.68095e+07	3.6791e+07	3.74586e+07	5.38036e+07	3.71757e+07	3.15825e+07	2.89527e+07	3.0394e+07	4.57149e+07	4.59027e+07	5.01618e+07	4.10061e+07	3.67765e+07	4.01481e+07	4.2293e+07	3.16611e+07	2.80347e+07	3.6327e+07
155	MAC_00397	8.03372	250317000	452403000	387119000	299905000	421106000	336379000	357090000	683554000	348252000	342269000	393531000	415145000	360858000	315305000	310716000	247197000	310122000	352194000	3	18	2.91395e+08	3.89369e+08	3.86382e+08	3.4912e+08	3.62433e+08	3.35739e+08	4.1569e+08	5.88313e+08	3.47589e+08	3.98436e+08	3.387e+08	4.14355e+08	4.20076e+08	2.71373e+08	3.10125e+08	2.87763e+08	2.66912e+08	3.51524e+08	3.38496e+08	4.12598e+08	3.29804e+08	3.71605e+08	3.65951e+08	3.51858e+08	3.33702e+08	3.28677e+08	3.37182e+08
156	MAC_00398	7.05418	NA	10782100	101666000	NA	10932500	79339100	NA	15914700	81913300	NA	9369360	97545700	NA	8140510	73321600	NA	8881140	77729100	2	4	NA	10782100	1.25029e+07	NA	10932500	9.75714e+06	NA	15914700	1.00737e+07	NA	9369360	1.19962e+07	NA	8140510	9.0171e+06	NA	8881140	9.55914e+06	NA	1.14253e+07	1.06721e+07	NA	1.10386e+07	1.02256e+07	NA	8.89118e+06	9.77208e+06
157	MAC_00399	7.59314	105938000	161101000	134000000	116277000	180418000	113966000	157510000	313249000	138141000	132758000	157553000	135424000	137822000	146168000	96292400	98177300	154752000	100454000	3	12	1.18381e+08	1.24119e+08	1.55644e+08	1.29935e+08	1.39002e+08	1.32374e+08	1.76011e+08	2.41341e+08	1.60454e+08	1.48351e+08	1.21386e+08	1.57298e+08	1.5401e+08	1.12614e+08	1.11846e+08	1.09709e+08	1.19228e+08	1.1668e+08	1.37516e+08	1.31524e+08	1.32853e+08	1.38303e+08	1.40351e+08	1.3873e+08	1.41296e+08	1.34831e+08	1.5565e+08
158	MAC_00401	8.16597	340115000	342741000	600769000	367057000	341096000	439806000	536162000	742051000	497749000	428278000	324630000	602130000	449813000	289544000	435717000	330161000	314647000	383558000	3	9	3.52186e+08	3.86161e+08	5.14943e+08	3.80084e+08	3.84307e+08	3.76975e+08	5.55191e+08	8.36057e+08	4.26641e+08	4.43478e+08	3.65755e+08	5.1611e+08	4.65777e+08	3.26225e+08	3.73471e+08	3.41879e+08	3.54508e+08	3.28763e+08	4.09114e+08	4.09198e+08	4.3954e+08	4.04563e+08	3.88038e+08	3.95075e+08	4.45689e+08	4.67086e+08	4.13866e+08
159	MAC_00404	6.8305	61444600	83890900	94451000	68636900	60636900	87682200	80094500	115063000	80613500	75940400	59130400	100414000	89453200	56982100	69583900	55573100	55636300	92292400	3	12	6.51949e+07	9.12694e+07	8.18214e+07	7.28262e+07	6.59701e+07	7.59577e+07	8.49831e+07	1.25183e+08	6.98342e+07	8.05754e+07	6.43311e+07	8.6987e+07	9.4913e+07	6.19938e+07	6.02794e+07	5.8965e+07	6.05297e+07	7.99514e+07	7.57331e+07	9.67143e+07	6.98402e+07	7.75164e+07	6.66104e+07	7.96046e+07	6.82217e+07	6.99369e+07	6.77432e+07
160	MAC_00405	7.19219	60542700	89136100	98833400	62661200	90127300	83181500	70789900	151136000	93715900	66657000	80679700	88548800	85614100	76273000	69119300	57420000	85687200	72270300	3	6	7.288e+07	7.70832e+07	9.49403e+07	7.54302e+07	7.79404e+07	7.99049e+07	8.52154e+07	1.307e+08	9.00244e+07	8.02403e+07	6.97703e+07	8.50608e+07	1.0306e+08	6.59595e+07	6.63967e+07	6.9121e+07	7.41007e+07	6.94235e+07	8.46605e+07	8.16818e+07	8.10381e+07	8.02882e+07	7.8697e+07	8.37414e+07	6.84082e+07	7.30189e+07	8.73289e+07
161	MAC_00406	6.37814	NA	4065360	7366210	NA	5147810	6168420	NA	7386800	6317860	NA	4381520	6870520	NA	3986900	4761510	NA	4158160	6419240	2	3	NA	4065360	5.56672e+06	NA	5147810	4.66154e+06	NA	7386800	4.77447e+06	NA	4381520	5.19213e+06	NA	3986900	3.59832e+06	NA	4158160	4.85109e+06	NA	4.30789e+06	4.75158e+06	NA	5.19778e+06	4.88535e+06	NA	4.12684e+06	4.63152e+06
162	MAC_00407	7.74278	232857000	431790000	548208000	247358000	438121000	475149000	327776000	795200000	519481000	285809000	390712000	532586000	301429000	355960000	393830000	215619000	369931000	428016000	3	17	3.36725e+08	3.72816e+08	4.39074e+08	3.57694e+08	3.78283e+08	3.80559e+08	4.73983e+08	6.86592e+08	4.16065e+08	4.13296e+08	3.37349e+08	4.26562e+08	4.35884e+08	3.07343e+08	3.15428e+08	3.11798e+08	3.19406e+08	3.42809e+08	3.91154e+08	3.95058e+08	3.7478e+08	3.80731e+08	3.81954e+08	3.9883e+08	3.80498e+08	3.83583e+08	4.03608e+08
163	MAC_00409	7.87572	56685000	94669400	153778000	53623600	95271300	104206000	69788100	143473000	96234400	64475900	92196100	146487000	69714000	81275800	102279000	49379400	95435000	115788000	3	4	8.37141e+07	8.51069e+07	1.15827e+08	7.9193e+07	8.5648e+07	7.84887e+07	1.03065e+08	1.28981e+08	7.24844e+07	9.522e+07	8.28834e+07	1.10335e+08	1.02956e+08	7.30661e+07	7.70373e+07	7.2925e+07	8.57951e+07	8.72123e+07	9.72458e+07	9.01841e+07	9.88661e+07	8.42933e+07	8.64793e+07	8.22571e+07	8.27374e+07	7.20586e+07	7.03141e+07
164	MAC_00411	6.92737	13636000	45819400	NA	13305700	53673100	NA	15899400	76786600	NA	14787000	49917800	NA	17591200	33090400	NA	11720000	38285100	NA	2	2	4.53766e+07	45819400	NA	4.42775e+07	53673100	NA	5.29085e+07	7.67866e+07	NA	4.92068e+07	4.99178e+07	NA	5.85384e+07	33090400	NA	3.90007e+07	38285100	NA	5.27114e+07	4.85529e+07	NA	4.71291e+07	5.41941e+07	NA	4.24733e+07	4.28989e+07	NA
165	MAC_00414	7.10787	42690600	63275500	36536600	48582100	78859400	30434000	66980600	141835000	32650000	54532400	62308500	36838700	55852300	57062400	26281500	38644000	62916100	26707700	3	5	4.13206e+07	4.19505e+07	5.69366e+07	4.70231e+07	5.22824e+07	4.74267e+07	6.48311e+07	9.40341e+07	5.088e+07	5.27824e+07	4.13094e+07	5.74074e+07	5.40599e+07	3.78314e+07	4.09556e+07	3.74039e+07	4.17123e+07	4.16198e+07	4.79998e+07	4.44532e+07	4.85993e+07	5.00515e+07	5.27899e+07	4.97037e+07	5.20443e+07	5.25347e+07	4.93565e+07
166	MAC_00417	7.1253	52764800	114785000	84722200	58813200	129640000	84572100	77466400	214157000	87538000	69803600	108875000	90571200	68888200	89821600	67165300	51257300	104156000	84177600	3	11	7.23961e+07	8.08134e+07	8.77058e+07	8.06949e+07	9.12719e+07	8.75504e+07	1.06288e+08	1.50775e+08	9.06207e+07	9.57743e+07	7.66525e+07	9.37607e+07	9.45183e+07	6.32381e+07	6.95306e+07	7.03278e+07	7.33301e+07	8.7142e+07	8.40984e+07	8.56345e+07	7.48629e+07	8.58919e+07	9.21578e+07	9.17539e+07	8.53246e+07	8.42347e+07	8.79073e+07
167	MAC_00419	6.25045	6840550	10212500	NA	7049390	8908450	NA	9056910	16658200	NA	8781730	8878660	NA	9214350	7546850	NA	6052810	8272270	NA	2	3	8.59219e+06	10212500	NA	8.8545e+06	8.90845e+06	NA	1.13761e+07	16658200	NA	1.10304e+07	8.87866e+06	NA	1.15738e+07	7.54685e+06	NA	7.60273e+06	8272270	NA	9.98104e+06	1.08218e+07	NA	9.42476e+06	8.99492e+06	NA	9.13235e+06	9.30655e+06	NA
168	MAC_00423	7.52463	90021700	159952000	244919000	103530000	174434000	172677000	137943000	316269000	196319000	115505000	157196000	211729000	127460000	146744000	154513000	96860000	166277000	155680000	3	13	1.26013e+08	1.37725e+08	2.03203e+08	1.44922e+08	1.50194e+08	1.43266e+08	1.93094e+08	2.7232e+08	1.62881e+08	1.61685e+08	1.35352e+08	1.75666e+08	1.7842e+08	1.26352e+08	1.28196e+08	1.35586e+08	1.43171e+08	1.29164e+08	1.46382e+08	1.45941e+08	1.73448e+08	1.54256e+08	1.51652e+08	1.50144e+08	1.5501e+08	1.52139e+08	1.58004e+08
169	MAC_00425	8.14939	422593000	667107000	827568000	431126000	546913000	531748000	435729000	712099000	481237000	482112000	499677000	663640000	509044000	466335000	502692000	406008000	555042000	548762000	3	21	5.00232e+08	6.20508e+08	7.51627e+08	5.10333e+08	5.0871e+08	4.82952e+08	5.15782e+08	6.62357e+08	4.37077e+08	5.70686e+08	4.64773e+08	6.02742e+08	6.02566e+08	4.3376e+08	4.56563e+08	4.806e+08	5.16271e+08	4.98405e+08	5.81091e+08	6.57526e+08	6.41565e+08	5.43201e+08	5.13648e+08	5.0614e+08	4.14053e+08	3.70044e+08	4.2399e+08
170	MAC_00426	7.07172	50504800	41454600	15223500	57689600	44932900	13090700	87834000	99986700	14384000	63893600	43014400	15045600	70259200	36423600	11347200	46966000	40583900	11206400	3	6	2.78557e+07	2.9439e+07	3.88671e+07	3.18185e+07	3.19091e+07	3.34219e+07	4.84445e+07	7.10055e+07	3.67238e+07	3.52403e+07	3.05467e+07	3.84129e+07	3.87512e+07	2.58662e+07	2.89705e+07	2.59039e+07	2.88206e+07	2.86111e+07	3.23584e+07	3.11952e+07	3.31758e+07	3.38677e+07	3.22188e+07	3.50265e+07	3.88897e+07	3.96692e+07	3.56242e+07
171	MAC_00429	6.9274	77173300	79263800	70057000	88690400	95602700	59985300	118442000	170772000	61148900	105972000	82150600	68286300	109277000	73490000	51368700	77154000	80698800	53144200	3	13	6.5855e+07	6.92213e+07	9.40081e+07	7.56829e+07	8.34901e+07	8.04931e+07	1.01071e+08	1.49136e+08	8.20545e+07	9.043e+07	7.17423e+07	9.16321e+07	9.32503e+07	6.4179e+07	6.89307e+07	6.58385e+07	7.04745e+07	7.13132e+07	7.64999e+07	7.33509e+07	8.02424e+07	8.05572e+07	8.43005e+07	8.43578e+07	8.11366e+07	8.33186e+07	7.95976e+07
172	MAC_00431	6.12978	11546700	7777820	8654690	12456000	8318780	7193490	18121900	16192700	8129820	14969700	7394090	9111470	14801000	7669420	5978090	11019000	7183750	6540930	3	3	8.15243e+06	8.61514e+06	1.10667e+07	8.79443e+06	9.21434e+06	9.19827e+06	1.27948e+07	1.79359e+07	1.03955e+07	1.05692e+07	8.1901e+06	1.16508e+07	1.04501e+07	8.49507e+06	7.64415e+06	7.77985e+06	7.95711e+06	8.36385e+06	9.4702e+06	9.1291e+06	9.44619e+06	9.36082e+06	9.30378e+06	9.6399e+06	1.02712e+07	1.00204e+07	1.00843e+07
173	MAC_00432	6.87716	35787800	46810800	NA	36425100	51024400	NA	51537300	93293300	NA	44792100	45986900	NA	48068900	42223800	NA	29418000	42950200	NA	2	3	4.57545e+07	46810800	NA	4.65693e+07	51024400	NA	6.58902e+07	9.32933e+07	NA	5.72665e+07	45986900	NA	6.14559e+07	42223800	NA	3.76108e+07	42950200	NA	5.31504e+07	4.96034e+07	NA	4.95686e+07	5.15197e+07	NA	5.28945e+07	5.21208e+07	NA
174	MAC_00433	6.92435	43117100	81604700	62555100	43885800	88630700	51529500	48154500	118983000	48007600	50696900	79943600	63544300	61153500	68861100	48049600	38013900	66495300	49737700	3	6	5.43333e+07	5.85557e+07	6.91818e+07	5.5302e+07	6.35972e+07	5.69882e+07	6.06811e+07	8.53766e+07	5.30932e+07	6.38849e+07	5.73638e+07	7.02758e+07	7.70616e+07	4.94115e+07	5.31397e+07	4.79026e+07	4.77139e+07	5.50066e+07	6.31159e+07	6.2049e+07	5.90515e+07	5.88637e+07	6.42145e+07	5.97244e+07	4.87129e+07	4.76979e+07	5.15035e+07
175	MAC_00440	8.06219	783562000	1000220000	1797960000	911850000	1201300000	1653040000	1357120000	2196310000	1805330000	1040050000	963312000	1775820000	1077570000	843702000	1265340000	741271000	939897000	1429950000	3	73	9.77507e+08	1.07089e+09	1.34612e+09	1.13755e+09	1.28618e+09	1.23762e+09	1.69303e+09	2.35149e+09	1.35164e+09	1.29748e+09	1.03137e+09	1.32955e+09	1.34429e+09	9.03313e+08	9.47352e+08	9.24749e+08	1.0063e+09	1.07059e+09	1.13551e+09	1.13478e+09	1.14901e+09	1.21081e+09	1.29866e+09	1.29704e+09	1.35911e+09	1.31372e+09	1.31117e+09
176	MAC_00442	6.61292	28517100	39940500	31994500	26586400	28835800	23154900	31788500	61380600	29632600	31252400	29468600	28328700	36794400	30797400	21293200	26976100	31661900	20515900	3	5	2.8497e+07	3.37874e+07	3.78478e+07	2.65676e+07	2.43935e+07	2.7391e+07	3.1766e+07	5.19246e+07	3.50538e+07	3.12303e+07	2.49288e+07	3.35113e+07	3.67684e+07	2.60529e+07	2.51887e+07	2.6957e+07	2.67842e+07	2.42692e+07	3.31032e+07	3.58031e+07	3.23057e+07	2.82787e+07	2.46303e+07	2.87061e+07	2.55008e+07	2.90091e+07	3.40042e+07
177	MAC_00443	7.11281	59859100	155930000	48681700	72269700	171552000	32993300	85992200	298403000	31574200	74964500	150183000	39251500	79408900	135983000	29265300	68851300	163057000	33043900	3	8	6.25411e+07	6.89286e+07	1.05405e+08	7.55077e+07	7.58343e+07	7.14366e+07	8.98451e+07	1.31909e+08	6.8364e+07	7.83233e+07	6.63882e+07	8.49867e+07	8.29668e+07	6.01111e+07	6.33648e+07	7.19362e+07	7.20791e+07	7.15461e+07	7.26503e+07	7.30407e+07	8.99703e+07	8.03707e+07	7.65704e+07	7.48664e+07	7.21247e+07	7.36943e+07	6.6317e+07
178	MAC_00444	6.96175	41637600	43665700	32917600	41034600	48499200	17252400	43647400	72971900	18113000	43113500	48949900	20947300	53382100	50368200	16183200	44253200	49517600	16698800	3	4	3.34131e+07	3.01101e+07	5.94875e+07	3.29292e+07	3.34431e+07	3.11779e+07	3.50259e+07	5.03185e+07	3.27332e+07	3.45974e+07	3.37539e+07	3.78552e+07	4.28377e+07	3.47319e+07	2.92457e+07	3.5512e+07	3.41454e+07	3.01775e+07	3.8814e+07	3.19064e+07	5.07767e+07	3.50499e+07	3.37677e+07	3.26748e+07	2.81176e+07	2.81118e+07	3.17531e+07
179	MAC_00449	7.0743	30542100	55348700	77161500	32047900	62423700	67445200	39505100	101854000	63738200	37914600	53678200	82876300	39665900	47222500	56283700	28066800	54830400	62119400	3	5	4.62667e+07	4.75742e+07	5.92607e+07	4.85478e+07	5.36554e+07	5.17985e+07	5.98443e+07	8.75472e+07	4.89515e+07	5.7435e+07	4.61383e+07	6.36497e+07	6.00879e+07	4.05894e+07	4.32264e+07	4.2517e+07	4.71287e+07	4.77082e+07	5.37454e+07	5.04124e+07	5.05831e+07	5.16745e+07	5.41762e+07	5.42855e+07	4.80411e+07	4.89106e+07	4.74858e+07
180	MAC_00450	6.79729	25680100	61576400	40488100	30982300	63600200	38389400	37498100	100209000	36617100	34237200	55723800	43915900	39568400	56000900	31810000	25579900	58552800	33583000	3	6	3.42588e+07	4.05266e+07	4.61133e+07	4.13323e+07	4.18586e+07	4.3723e+07	5.00247e+07	6.59527e+07	4.17045e+07	4.56745e+07	3.66747e+07	5.00173e+07	5.27866e+07	3.68571e+07	3.62295e+07	3.41251e+07	3.85366e+07	3.82488e+07	3.97965e+07	4.29443e+07	3.93609e+07	4.39942e+07	4.22649e+07	4.58222e+07	4.01582e+07	3.68463e+07	4.04557e+07
181	MAC_00452	7.55966	80499200	175478000	181105000	85647500	203660000	156774000	116873000	368510000	182857000	102565000	172312000	185428000	101507000	156580000	129347000	70878400	167865000	142923000	3	9	1.25599e+08	1.27015e+08	1.60363e+08	1.33631e+08	1.47414e+08	1.38818e+08	1.82351e+08	2.66737e+08	1.61914e+08	1.60027e+08	1.24724e+08	1.64191e+08	1.58376e+08	1.13336e+08	1.14533e+08	1.10588e+08	1.21505e+08	1.26554e+08	1.45901e+08	1.34593e+08	1.36881e+08	1.42238e+08	1.48845e+08	1.45484e+08	1.46385e+08	1.4902e+08	1.57066e+08
182	MAC_00454	7.18961	58282600	85206000	130726000	65275000	95285600	106765000	78902200	144846000	101202000	74561800	76474900	130879000	77700900	69589100	96664800	57021400	78167300	108446000	3	10	7.5122e+07	8.41737e+07	1.02666e+08	8.41347e+07	9.41311e+07	8.38483e+07	1.01699e+08	1.43091e+08	7.94794e+07	9.61047e+07	7.55483e+07	1.02786e+08	1.00151e+08	6.8746e+07	7.59161e+07	7.34964e+07	7.72202e+07	8.51685e+07	8.72649e+07	8.91953e+07	8.76327e+07	8.95533e+07	9.50448e+07	8.78741e+07	8.16408e+07	7.99417e+07	7.70996e+07
183	MAC_00455	6.5835	NA	27854200	29569800	NA	35758400	24004200	NA	57944900	26041200	NA	31538300	26589100	NA	28760100	22290200	NA	32302100	19944000	2	2	NA	27854200	4.1588e+07	NA	35758400	3.37603e+07	NA	57944900	3.66252e+07	NA	31538300	3.73958e+07	NA	28760100	3.13497e+07	NA	32302100	2.80499e+07	NA	2.95159e+07	3.54982e+07	NA	3.61055e+07	3.53812e+07	NA	3.23725e+07	3.55286e+07
184	MAC_00456	6.6014	11870000	14554600	12589700	12244800	15553700	10158900	14683700	21479000	9346560	15216500	13353600	11587300	15465700	12714100	8958730	13007700	14623900	10520500	3	3	1.12309e+07	1.24313e+07	1.55788e+07	1.15855e+07	1.32847e+07	1.25709e+07	1.38931e+07	1.83456e+07	1.15657e+07	1.43972e+07	1.14055e+07	1.43385e+07	1.4633e+07	1.08593e+07	1.10858e+07	1.23073e+07	1.24905e+07	1.30184e+07	1.30462e+07	1.3173e+07	1.32976e+07	1.23316e+07	1.34136e+07	1.31745e+07	1.11529e+07	1.02493e+07	1.12194e+07
185	MAC_00457	8.84013	1135080000	1578490000	2350160000	1212410000	1808150000	1709640000	1660720000	2715580000	1666320000	1424700000	1509640000	2338110000	1547740000	1323210000	1742110000	1086560000	1385520000	1803740000	3	26	1.38337e+09	1.53222e+09	1.98658e+09	1.47762e+09	1.75515e+09	1.44515e+09	2.02399e+09	2.63597e+09	1.40853e+09	1.73635e+09	1.46539e+09	1.97639e+09	1.8863e+09	1.28442e+09	1.4726e+09	1.32424e+09	1.3449e+09	1.52469e+09	1.60698e+09	1.62363e+09	1.69568e+09	1.57278e+09	1.77218e+09	1.51454e+09	1.6248e+09	1.47266e+09	1.36636e+09
186	MAC_00458	6.91667	16270800	NA	29528100	18253500	NA	27457700	20165500	NA	27641700	21307500	NA	35760700	25147000	NA	24646800	15893500	NA	32008600	2	3	2.00686e+07	NA	2.39402e+07	2.25141e+07	NA	2.22616e+07	2.48724e+07	NA	2.24108e+07	2.62809e+07	NA	2.89933e+07	3.10166e+07	NA	1.99826e+07	1.96032e+07	NA	2.59513e+07	2.33125e+07	NA	2.04346e+07	2.39641e+07	NA	2.33304e+07	1.99667e+07	NA	2.17397e+07
187	MAC_00460	6.87348	NA	13775000	77026700	NA	15243900	57440800	NA	17904900	52772500	NA	15586700	80912100	NA	10631400	56857500	NA	11897300	49749200	2	3	NA	13775000	1.7525e+07	NA	15243900	1.30688e+07	NA	17904900	1.20067e+07	NA	15586700	1.8409e+07	NA	10631400	1.29361e+07	NA	11897300	1.13188e+07	NA	1.45968e+07	1.49588e+07	NA	1.53919e+07	1.36963e+07	NA	1.00031e+07	1.16472e+07
188	MAC_00463	6.68363	NA	25249100	24255200	NA	28811600	20928300	NA	47635900	23809000	NA	27824600	25347100	NA	21321500	18066400	NA	25844000	18921700	2	2	NA	25249100	3.17949e+07	NA	28811600	2.74338e+07	NA	47635900	3.121e+07	NA	27824600	3.32262e+07	NA	21321500	2.36823e+07	NA	25844000	2.48035e+07	NA	2.67554e+07	2.71391e+07	NA	2.90913e+07	2.8751e+07	NA	2.66131e+07	3.02755e+07
189	MAC_00468	6.82902	30410300	29816400	NA	36739700	33252800	NA	46035600	65514200	NA	37307500	34771200	NA	41864300	28598200	NA	30428200	29805200	NA	2	5	2.92239e+07	29816400	NA	3.53063e+07	33252800	NA	4.42396e+07	6.55142e+07	NA	3.5852e+07	34771200	NA	4.0231e+07	28598200	NA	2.92411e+07	29805200	NA	3.39477e+07	3.15952e+07	NA	3.75802e+07	3.35756e+07	NA	3.55141e+07	3.66013e+07	NA
190	MAC_00470	7.56221	106919000	201402000	282562000	128792000	239400000	252688000	199953000	491763000	289548000	145285000	200734000	292496000	146871000	174598000	223999000	104538000	191580000	226417000	3	22	1.59201e+08	1.7432e+08	2.1925e+08	1.9177e+08	2.07208e+08	1.9607e+08	2.97728e+08	4.25636e+08	2.24671e+08	2.16328e+08	1.73742e+08	2.26958e+08	2.18689e+08	1.5112e+08	1.73809e+08	1.55656e+08	1.65818e+08	1.75685e+08	1.84935e+08	1.84719e+08	1.87145e+08	2.0412e+08	2.09219e+08	2.05484e+08	2.39006e+08	2.37793e+08	2.17944e+08
191	MAC_00472	8.3237	184324000	343396000	529108000	210607000	376355000	424538000	285433000	763381000	514722000	257685000	335766000	532232000	253255000	297122000	389117000	164641000	335757000	382354000	3	13	2.82192e+08	3.0213e+08	3.92811e+08	3.2243e+08	3.31128e+08	3.15178e+08	4.36985e+08	6.71644e+08	3.82131e+08	3.94504e+08	2.95416e+08	3.95131e+08	3.87722e+08	2.61416e+08	2.88882e+08	2.52058e+08	2.95409e+08	2.83861e+08	3.27806e+08	3.20154e+08	3.35292e+08	3.43195e+08	3.34342e+08	3.30311e+08	3.50797e+08	3.75232e+08	3.70689e+08
192	MAC_00473	7.39242	82674500	174427000	105066000	78078700	194179000	79448100	108533000	287322000	91443900	93737800	164444000	93209100	96276900	146115000	69291200	66647300	159843000	76605500	3	8	1.05425e+08	1.05326e+08	1.36448e+08	9.95648e+07	1.17253e+08	1.03178e+08	1.384e+08	1.73497e+08	1.18757e+08	1.19533e+08	9.92979e+07	1.21049e+08	1.22771e+08	8.82301e+07	8.99876e+07	8.49876e+07	9.65197e+07	9.94866e+07	1.22466e+08	1.1161e+08	1.16468e+08	1.05977e+08	1.18391e+08	1.08132e+08	1.11103e+08	9.69286e+07	1.15201e+08
193	MAC_00475	8.06606	87062500	152504000	270908000	113977000	183089000	188301000	130729000	288760000	178723000	118239000	159408000	216668000	124653000	141428000	152911000	94719500	174492000	168370000	3	9	1.2285e+08	1.33535e+08	2.19261e+08	1.60828e+08	1.60316e+08	1.52403e+08	1.84466e+08	2.52844e+08	1.44651e+08	1.66842e+08	1.39581e+08	1.75362e+08	1.75893e+08	1.23837e+08	1.2376e+08	1.33655e+08	1.52789e+08	1.36271e+08	1.42708e+08	1.41502e+08	1.87155e+08	1.71186e+08	1.61872e+08	1.5972e+08	1.48084e+08	1.41258e+08	1.4032e+08
194	MAC_00477	6.73288	16120700	68998200	47154400	19220100	72549200	37980900	29850100	168763000	43089700	20369300	59053900	41389100	20352400	60429300	29861700	13214500	65249800	33160900	3	5	3.21011e+07	3.46571e+07	4.71446e+07	3.8273e+07	3.64407e+07	3.7973e+07	5.94405e+07	8.47678e+07	4.30807e+07	4.05614e+07	2.96621e+07	4.13805e+07	4.05277e+07	3.0353e+07	2.98555e+07	2.6314e+07	3.27743e+07	3.3154e+07	3.729e+07	3.67246e+07	4.02412e+07	4.07379e+07	3.67944e+07	3.97962e+07	4.77169e+07	4.73578e+07	4.17908e+07
195	MAC_00478	6.88417	39163500	10643500	48452000	41917900	11575900	32428800	54946600	18837400	32908500	48083100	9577440	40482900	51212500	9299680	31832800	36720200	11925300	32447800	3	5	2.31906e+07	2.43289e+07	3.57968e+07	2.48216e+07	2.64602e+07	2.39587e+07	3.25365e+07	4.30585e+07	2.43131e+07	2.84723e+07	2.18921e+07	2.99091e+07	3.03254e+07	2.12572e+07	2.35184e+07	2.17438e+07	2.72588e+07	2.39727e+07	2.69391e+07	2.57803e+07	3.0555e+07	2.64202e+07	2.6717e+07	2.5109e+07	2.61192e+07	2.40558e+07	2.35851e+07
196	MAC_00479	7.12035	33943800	59512000	82868200	37577100	55487700	61735400	44949000	98612600	70474400	37505900	55532500	68542900	45816400	54778900	54942800	33476000	57821400	56381400	3	7	4.73703e+07	5.16095e+07	6.84726e+07	5.24408e+07	4.81196e+07	5.10109e+07	6.27287e+07	8.5518e+07	5.82318e+07	5.23414e+07	4.81584e+07	5.66358e+07	6.39392e+07	4.75049e+07	4.53983e+07	4.67175e+07	5.01434e+07	4.6587e+07	5.50274e+07	5.46884e+07	5.84461e+07	5.58182e+07	4.85867e+07	5.346e+07	5.03566e+07	4.7777e+07	5.64882e+07
197	MAC_00482	7.44916	112243000	117991000	94090300	95458700	128417000	67407000	103165000	167358000	49265300	119505000	109979000	99819200	139340000	102792000	67888900	86347700	102571000	90028800	3	8	1.03237e+08	9.79473e+07	1.23233e+08	8.77993e+07	1.06602e+08	8.82848e+07	9.48872e+07	1.38928e+08	6.45241e+07	1.09916e+08	9.12963e+07	1.30736e+08	1.2816e+08	8.53302e+07	8.8916e+07	7.94193e+07	8.51467e+07	1.17913e+08	1.19924e+08	1.03791e+08	1.05188e+08	9.34539e+07	1.07637e+08	9.25236e+07	7.61724e+07	7.76159e+07	6.25922e+07
198	MAC_00485	7.48631	76671500	119832000	113486000	78749400	83988400	71573200	102968000	129660000	77354200	85903300	84598700	93518900	93947500	82362400	74891700	65825100	100891000	72533200	3	7	8.09951e+07	1.06771e+08	1.2057e+08	8.31902e+07	7.4834e+07	7.60407e+07	1.08775e+08	1.15528e+08	8.21825e+07	9.07475e+07	7.53777e+07	9.93562e+07	9.92454e+07	7.33852e+07	7.95663e+07	6.95371e+07	8.98942e+07	7.70606e+07	9.40873e+07	1.1314e+08	1.02915e+08	8.8548e+07	7.55604e+07	7.96916e+07	8.73207e+07	6.45426e+07	7.97218e+07
199	MAC_00486	6.75958	14274800	48056500	27217100	15910900	47594000	22603400	17493600	75581400	21580800	16683100	44484000	26987100	20010200	39718800	20546800	15298700	47284000	22601000	3	6	2.31099e+07	2.60372e+07	3.10293e+07	2.57586e+07	2.57867e+07	2.57694e+07	2.83209e+07	4.09504e+07	2.46035e+07	2.70087e+07	2.41016e+07	3.07671e+07	3.23951e+07	2.15198e+07	2.34247e+07	2.47675e+07	2.56187e+07	2.57666e+07	2.68454e+07	2.75906e+07	2.64856e+07	2.74175e+07	2.6037e+07	2.70066e+07	2.27351e+07	2.2878e+07	2.38669e+07
200	MAC_00491	8.04961	367794000	404393000	467533000	391012000	423925000	404626000	459779000	642851000	364910000	459902000	372829000	483534000	499652000	326480000	348360000	329407000	349846000	388089000	3	21	3.64378e+08	4.0496e+08	4.71255e+08	3.87381e+08	4.2452e+08	4.07847e+08	4.55509e+08	6.43753e+08	3.67815e+08	4.55631e+08	3.73352e+08	4.87383e+08	4.95012e+08	3.26938e+08	3.51133e+08	3.26348e+08	3.50337e+08	3.91178e+08	4.23277e+08	4.29119e+08	4.02248e+08	4.1233e+08	4.2864e+08	4.27429e+08	3.65668e+08	3.5965e+08	3.56802e+08
201	MAC_00493	6.83599	28846900	40612800	47921200	34519500	42862500	48562300	44311900	71995200	52123300	38403900	37737500	50328200	39176900	35592600	35341400	29468400	39348600	41414300	3	5	3.35871e+07	3.85886e+07	4.3317e+07	4.01918e+07	4.07262e+07	4.38965e+07	5.15933e+07	6.84069e+07	4.71153e+07	4.47145e+07	3.58566e+07	4.54927e+07	4.56145e+07	3.38187e+07	3.19458e+07	3.43107e+07	3.73875e+07	3.74352e+07	3.90162e+07	4.08907e+07	3.6974e+07	4.27803e+07	4.11215e+07	4.6004e+07	4.14175e+07	3.82174e+07	4.57046e+07
202	MAC_00495	6.88704	12402100	NA	31776600	14595200	NA	24033900	18033700	NA	25484400	15986300	NA	27896500	16793500	NA	21364300	11207500	NA	22837800	2	2	1.63207e+07	NA	2.41471e+07	1.92067e+07	NA	1.82634e+07	2.37316e+07	NA	1.93656e+07	2.10373e+07	NA	2.11986e+07	2.20996e+07	NA	1.62348e+07	1.47486e+07	NA	1.73545e+07	1.89588e+07	NA	2.06112e+07	2.04437e+07	NA	1.91403e+07	1.9051e+07	NA	1.87858e+07
203	MAC_00497	7.30317	57331400	71813200	132601000	62428700	79541800	119983000	91386800	149704000	133321000	68878300	69660600	134967000	76336400	62977700	98707800	52523300	67643500	106242000	3	10	7.37648e+07	7.77845e+07	9.51483e+07	8.03232e+07	8.61558e+07	8.60942e+07	1.17582e+08	1.62152e+08	9.5665e+07	8.86215e+07	7.54529e+07	9.68461e+07	9.82174e+07	6.82143e+07	7.08281e+07	6.75785e+07	7.32681e+07	7.62343e+07	8.56883e+07	8.2425e+07	8.12157e+07	8.54963e+07	8.69921e+07	9.02278e+07	9.43909e+07	9.05906e+07	9.28006e+07
204	MAC_00498	6.56621	NA	7741850	25645400	NA	10441800	23475200	NA	19261000	26827600	NA	8906750	27583900	NA	7584390	17951600	NA	7644860	18843100	2	3	NA	7741850	1.07203e+07	NA	10441800	9.81316e+06	NA	19261000	1.12145e+07	NA	8906750	1.15307e+07	NA	7.58439e+06	7.50417e+06	NA	7.64486e+06	7.87684e+06	NA	8.20371e+06	9.15056e+06	NA	1.05432e+07	1.02843e+07	NA	1.07607e+07	1.08787e+07
205	MAC_00499	8.41964	225881000	339892000	603870000	233091000	342336000	440459000	295299000	624444000	499580000	277684000	313693000	531936000	282835000	276054000	390978000	205798000	298309000	393101000	3	15	3.11366e+08	3.35111e+08	4.44329e+08	3.21304e+08	3.37521e+08	3.24091e+08	4.07055e+08	6.1566e+08	3.67592e+08	3.82773e+08	3.0928e+08	3.914e+08	3.89874e+08	2.72171e+08	2.87683e+08	2.83682e+08	2.94113e+08	2.89245e+08	3.61695e+08	3.55103e+08	3.79266e+08	3.41997e+08	3.40797e+08	3.39651e+08	3.2677e+08	3.43955e+08	3.56586e+08
206	MAC_00500	6.88151	50229200	38882800	44934500	57199500	45047400	37790600	69815100	72726300	38034900	63818100	39507300	42338000	66746100	36123400	30981800	50198300	40149800	36313800	3	8	3.93239e+07	4.08921e+07	5.45755e+07	4.47809e+07	4.73753e+07	4.58988e+07	5.46575e+07	7.64845e+07	4.61955e+07	4.99625e+07	4.15489e+07	5.14219e+07	5.22548e+07	3.79901e+07	3.76291e+07	3.92997e+07	4.22246e+07	4.41051e+07	4.56803e+07	4.33316e+07	4.65839e+07	4.76649e+07	4.78351e+07	4.81025e+07	4.38773e+07	4.27301e+07	4.48123e+07
207	MAC_00502	8.29228	113402000	159075000	316051000	136899000	226742000	360420000	235071000	550247000	485261000	158878000	182698000	370340000	163508000	162948000	272944000	105170000	157704000	275698000	3	9	1.69883e+08	1.64197e+08	2.04392e+08	2.05083e+08	2.34043e+08	2.33086e+08	3.52151e+08	5.67964e+08	3.13822e+08	2.38009e+08	1.8858e+08	2.39501e+08	2.44945e+08	1.68195e+08	1.76515e+08	1.57551e+08	1.62782e+08	1.78296e+08	1.97343e+08	1.73992e+08	1.74463e+08	2.18291e+08	2.36314e+08	2.44277e+08	2.82695e+08	3.17308e+08	3.04425e+08
208	MAC_00503	6.45977	16513000	NA	11107900	19679200	NA	9835650	25565700	NA	11043900	21854000	NA	11529500	23981900	NA	8708160	17078200	NA	9745060	2	4	1.16919e+07	NA	1.56881e+07	1.39338e+07	NA	1.38913e+07	1.81017e+07	NA	1.55977e+07	1.54736e+07	NA	1.62836e+07	1.69803e+07	NA	1.22989e+07	1.20921e+07	NA	1.37633e+07	1.35819e+07	NA	1.33909e+07	1.48311e+07	NA	1.45582e+07	1.45314e+07	NA	1.51307e+07
209	MAC_00506	7.25554	45699600	105272000	98574800	56585200	139757000	80533200	71921100	214963000	77695100	60978400	103567000	95250900	74641200	87664100	61529900	47097800	98503300	76994100	3	6	6.45098e+07	7.30365e+07	1.00653e+08	7.9876e+07	9.69618e+07	8.22308e+07	1.01524e+08	1.49139e+08	7.93329e+07	8.60774e+07	7.18536e+07	9.72588e+07	1.05364e+08	6.08203e+07	6.2827e+07	6.64835e+07	6.83404e+07	7.86171e+07	7.49373e+07	7.73937e+07	8.59141e+07	8.50203e+07	9.7903e+07	8.61789e+07	8.15003e+07	8.33204e+07	7.69575e+07
210	MAC_00508	7.16266	21599100	62738900	113721000	25651600	70398000	88247600	41311400	165720000	107093000	29075100	56819300	109945000	29337500	49756100	77092200	19502100	50711000	82768600	3	6	4.49942e+07	5.12326e+07	6.68513e+07	5.34362e+07	5.7487e+07	5.18767e+07	8.6058e+07	1.35327e+08	6.2955e+07	6.05679e+07	4.63986e+07	6.46316e+07	6.11145e+07	4.06308e+07	4.5319e+07	4.06259e+07	4.14106e+07	4.86558e+07	5.22672e+07	5.4289e+07	5.70622e+07	5.68777e+07	5.8045e+07	5.43674e+07	6.90846e+07	7.56041e+07	6.107e+07
211	MAC_00513	6.46218	3801950	8652450	8880810	3590070	8426870	7834870	4642310	14282600	7997900	4479680	7210940	8240800	4554090	8080160	6048320	3406990	7727860	7100030	3	2	6.08586e+06	6.36187e+06	7.54556e+06	5.7467e+06	6.19601e+06	6.65688e+06	7.43104e+06	1.05015e+07	6.7954e+06	7.17072e+06	5.30197e+06	7.00177e+06	7.28983e+06	5.94108e+06	5.13894e+06	5.45364e+06	5.68205e+06	6.03252e+06	7.06959e+06	6.7414e+06	6.44066e+06	6.11681e+06	6.25615e+06	6.97649e+06	5.9654e+06	5.86697e+06	6.59193e+06
212	MAC_00515	7.06082	23187600	44575200	92650400	25012700	30115200	53235700	22514300	49865500	62772100	26335900	51904900	71953300	26271700	35312800	56798600	19466500	34731400	51621100	3	3	3.84532e+07	4.34556e+07	5.73084e+07	4.14798e+07	2.93588e+07	3.29286e+07	3.73366e+07	4.8613e+07	3.88273e+07	4.36742e+07	5.06012e+07	4.45063e+07	4.35677e+07	3.44259e+07	3.51325e+07	3.22823e+07	3.38591e+07	3.19299e+07	4.46688e+07	4.60481e+07	4.89167e+07	4.41513e+07	2.96438e+07	3.45096e+07	2.99726e+07	2.7159e+07	3.76648e+07
213	MAC_00518	6.52008	9151100	12814400	NA	9973020	13508600	NA	11698100	23158100	NA	11245100	13272600	NA	11086400	11528700	NA	8704430	13496200	NA	2	2	1.27003e+07	12814400	NA	1.3841e+07	13508600	NA	1.62352e+07	23158100	NA	1.56065e+07	13272600	NA	1.53862e+07	11528700	NA	1.20804e+07	13496200	NA	1.47532e+07	1.35789e+07	NA	1.47324e+07	1.36397e+07	NA	1.30331e+07	1.29379e+07	NA
214	MAC_00519	7.45172	38086200	80534300	94161400	40602100	73358200	85874200	57677000	143823000	100825000	46956200	70787100	111414000	45664600	59513200	80233100	31584100	65873000	89880400	3	8	6.05689e+07	6.95372e+07	6.85732e+07	6.45699e+07	6.3341e+07	6.2538e+07	9.17243e+07	1.24184e+08	7.3426e+07	7.46749e+07	6.1121e+07	8.11374e+07	7.26209e+07	5.13866e+07	5.84299e+07	5.02285e+07	5.68779e+07	6.54556e+07	7.03593e+07	7.36856e+07	5.8532e+07	6.87285e+07	6.39559e+07	6.55406e+07	7.36333e+07	6.93786e+07	7.12275e+07
215	MAC_00521	6.78572	26904700	53959000	68996000	29229400	52355300	53035100	42726800	99974800	57230900	33075700	48200200	61594100	33953300	42865300	48625200	24479100	48753100	50041600	3	6	3.95906e+07	4.48475e+07	5.64138e+07	4.30114e+07	4.35146e+07	4.33636e+07	6.2873e+07	8.30931e+07	4.67942e+07	4.86713e+07	4.00611e+07	5.03617e+07	4.99627e+07	3.56271e+07	3.97579e+07	3.60213e+07	4.05207e+07	4.0916e+07	4.59901e+07	4.7523e+07	4.81531e+07	4.57815e+07	4.3937e+07	4.54455e+07	5.04724e+07	4.64222e+07	4.53931e+07
216	MAC_00522	6.84356	24181100	17468000	50185000	30241400	26387200	31328100	30022500	31650000	24646500	30540000	19768600	34340100	41726400	19577300	27129500	28452200	19034200	27013700	3	5	2.18807e+07	2.20683e+07	4.38999e+07	2.73644e+07	3.33364e+07	2.74046e+07	2.71664e+07	3.99852e+07	2.15598e+07	2.76346e+07	2.49748e+07	3.00394e+07	3.77568e+07	2.47331e+07	2.37318e+07	2.57454e+07	2.4047e+07	2.36305e+07	2.54175e+07	2.33848e+07	3.74716e+07	2.91268e+07	3.366e+07	2.87204e+07	2.18083e+07	2.23388e+07	2.09143e+07
217	MAC_00523	7.59022	49273900	93106600	167785000	67499300	175891000	160001000	107586000	271313000	155225000	74334200	86125900	128230000	77735000	80065800	83731700	49896500	111556000	128198000	3	11	7.48206e+07	7.88886e+07	1.30411e+08	1.02495e+08	1.49031e+08	1.24361e+08	1.63365e+08	2.29882e+08	1.20649e+08	1.12874e+08	7.29739e+07	9.96671e+07	1.18038e+08	6.78392e+07	6.50807e+07	7.5766e+07	9.45207e+07	9.96422e+07	8.69147e+07	8.35949e+07	1.11315e+08	1.09096e+08	1.50478e+08	1.30332e+08	1.31144e+08	1.2843e+08	1.17037e+08
218	MAC_00526	6.73759	36464000	43729800	32856500	39649100	48566300	26839800	59508800	92297200	30609200	42370400	43225600	29977700	45486200	39208700	22308800	32816000	43634900	24960100	3	5	3.35273e+07	3.41497e+07	4.57591e+07	3.64559e+07	3.79266e+07	3.73797e+07	5.47162e+07	7.20771e+07	4.26293e+07	3.8958e+07	3.37559e+07	4.17498e+07	4.18229e+07	3.0619e+07	3.10694e+07	3.01731e+07	3.40756e+07	3.47619e+07	3.89467e+07	3.6187e+07	3.90586e+07	3.88038e+07	3.82948e+07	3.91744e+07	4.39244e+07	4.02678e+07	4.13529e+07
219	MAC_00528	8.10675	344916000	581408000	774650000	365444000	569579000	601799000	484441000	1171510000	682131000	396016000	522708000	678573000	438586000	506779000	499060000	334702000	552824000	519207000	3	27	4.68957e+08	4.97959e+08	6.65232e+08	4.96868e+08	4.87828e+08	5.16796e+08	6.58659e+08	1.00336e+09	5.85781e+08	5.38434e+08	4.47684e+08	5.82726e+08	5.96314e+08	4.34041e+08	4.28569e+08	4.5507e+08	4.73478e+08	4.4587e+08	5.4476e+08	5.27666e+08	5.67822e+08	5.28868e+08	4.92563e+08	5.41609e+08	5.2875e+08	5.60556e+08	5.68242e+08
220	MAC_00530	6.83254	27949100	34568900	28923400	30961300	35947900	23895800	42424800	68861800	26989600	39674100	36909500	36899100	39025100	28407300	21554600	29043300	32809900	25812900	3	5	2.66116e+07	2.98897e+07	3.51326e+07	2.94797e+07	3.1082e+07	2.90257e+07	4.03946e+07	5.95407e+07	3.27836e+07	3.77755e+07	3.19135e+07	4.48205e+07	3.71576e+07	2.45621e+07	2.61819e+07	2.76535e+07	2.83688e+07	3.13543e+07	3.09132e+07	3.16728e+07	2.99881e+07	3.13783e+07	3.13837e+07	3.04193e+07	3.24275e+07	3.3264e+07	3.1802e+07
221	MAC_00531	9.07975	381026000	571412000	892989000	420099000	659324000	782171000	573866000	1252070000	951770000	487106000	580454000	936494000	514202000	524067000	662993000	344975000	569611000	684748000	3	9	5.28952e+08	5.37799e+08	6.83461e+08	5.83194e+08	6.20539e+08	5.98645e+08	7.96659e+08	1.17842e+09	7.2845e+08	6.76216e+08	5.46309e+08	7.16759e+08	7.13831e+08	4.93239e+08	5.07431e+08	4.78905e+08	5.36104e+08	5.24081e+08	6.14453e+08	5.69882e+08	5.83382e+08	6.20754e+08	6.26563e+08	6.27388e+08	6.39532e+08	6.58354e+08	7.06639e+08
222	MAC_00532	7.04599	11691800	56327000	41948000	11852600	50022600	34154900	13398400	81705400	31887100	12301800	39232200	41351800	15922500	39681500	30262500	10864200	42007200	36138200	3	4	2.61726e+07	3.19047e+07	3.30832e+07	2.65326e+07	2.83338e+07	2.6937e+07	2.99929e+07	4.62796e+07	2.51484e+07	2.75381e+07	2.22219e+07	3.2613e+07	3.56432e+07	2.24764e+07	2.38671e+07	2.432e+07	2.37937e+07	2.85011e+07	3.04032e+07	3.38081e+07	2.82388e+07	2.82414e+07	2.86088e+07	2.82303e+07	2.40773e+07	2.58553e+07	2.43954e+07
223	MAC_00535	8.90691	565494000	1301790000	1567530000	647023000	1460760000	966393000	986402000	2716940000	1086280000	751388000	1226820000	1620170000	758054000	1090870000	1042080000	548722000	1247810000	928663000	3	18	8.56227e+08	9.5669e+08	1.40872e+09	9.79672e+08	1.07352e+09	8.68485e+08	1.49353e+09	1.99669e+09	9.76226e+08	1.13769e+09	9.01594e+08	1.45603e+09	1.14779e+09	8.01684e+08	9.36504e+08	8.30832e+08	9.1702e+08	8.34578e+08	9.94629e+08	1.01376e+09	1.20244e+09	1.04277e+09	1.08394e+09	9.10184e+08	1.19896e+09	1.1155e+09	9.46996e+08
224	MAC_00536	6.45829	4260570	NA	8234640	4144340	NA	7895470	6296280	NA	9860100	5024750	NA	9528810	5828980	NA	6247140	3689690	NA	6634840	2	2	5.49263e+06	NA	6.38752e+06	5.34279e+06	NA	6.12443e+06	8.11702e+06	NA	7.64837e+06	6.47779e+06	NA	7.39139e+06	7.51459e+06	NA	4.84584e+06	4.75666e+06	NA	5.14657e+06	6.38047e+06	NA	5.45219e+06	5.68688e+06	NA	6.41848e+06	6.51608e+06	NA	7.41936e+06
225	MAC_00537	6.76069	18569500	62132200	38458900	21781400	71200500	30710200	34677100	149097000	34438700	26210900	63383300	36809100	25308300	56448500	25712200	18221500	64947000	28672000	3	7	3.0077e+07	3.23632e+07	4.55856e+07	3.52793e+07	3.70867e+07	3.6401e+07	5.61665e+07	7.76611e+07	4.08204e+07	4.24538e+07	3.30149e+07	4.36301e+07	4.09918e+07	2.94027e+07	3.04769e+07	2.95133e+07	3.38294e+07	3.39851e+07	3.49387e+07	3.42939e+07	3.89105e+07	3.75514e+07	3.74467e+07	3.81487e+07	4.50886e+07	4.33875e+07	3.95982e+07
226	MAC_00538	7.5384	54627400	166326000	281000000	61360100	178361000	232902000	87491300	347063000	267347000	70189600	150301000	274057000	70218400	131570000	204962000	51492100	152890000	206528000	3	15	1.18555e+08	1.31997e+08	1.63153e+08	1.33167e+08	1.41547e+08	1.35227e+08	1.89878e+08	2.7543e+08	1.55226e+08	1.52329e+08	1.19279e+08	1.59122e+08	1.52391e+08	1.04414e+08	1.19004e+08	1.11751e+08	1.21334e+08	1.19913e+08	1.37718e+08	1.39871e+08	1.39262e+08	1.41743e+08	1.42921e+08	1.41719e+08	1.52428e+08	1.53876e+08	1.50578e+08
227	MAC_00542	8.27895	614011000	689235000	474948000	555499000	617049000	308968000	631052000	909191000	302002000	650979000	552725000	414466000	729199000	515045000	297978000	512640000	613692000	385204000	3	12	5.20958e+08	5.60503e+08	6.88349e+08	4.71314e+08	5.01799e+08	4.47792e+08	5.35417e+08	7.39377e+08	4.37696e+08	5.52324e+08	4.4949e+08	6.00692e+08	6.18689e+08	4.18847e+08	4.31864e+08	4.3495e+08	4.99069e+08	5.58282e+08	6.05167e+08	5.93941e+08	5.87554e+08	5.01668e+08	5.0667e+08	4.69292e+08	4.29815e+08	4.13073e+08	4.24591e+08
228	MAC_00543	6.74474	NA	47295800	18289700	NA	35920500	14418100	NA	76853900	17662600	NA	37094100	18779800	NA	45177600	18597200	NA	35447600	16171400	2	3	NA	47295800	4.71851e+07	NA	35920500	3.71969e+07	NA	76853900	4.55673e+07	NA	37094100	4.84495e+07	NA	45177600	4.79784e+07	NA	35447600	4.17202e+07	NA	5.01174e+07	4.02758e+07	NA	3.62692e+07	3.89828e+07	NA	4.29365e+07	4.42029e+07
229	MAC_00545	7.50761	76914500	108501000	135489000	85378000	105273000	118804000	139051000	251712000	152349000	102423000	103453000	153756000	104363000	84260200	109818000	68981100	95986800	100010000	3	9	9.1319e+07	1.04187e+08	1.18842e+08	1.01368e+08	1.01088e+08	1.04207e+08	1.65092e+08	2.41705e+08	1.3363e+08	1.21605e+08	9.934e+07	1.34865e+08	1.23908e+08	8.09103e+07	9.63251e+07	8.18998e+07	9.21707e+07	8.77222e+07	1.0608e+08	1.10403e+08	1.0144e+08	1.07896e+08	1.02069e+08	1.0921e+08	1.32531e+08	1.35035e+08	1.29629e+08
230	MAC_00546	8.76691	1241300000	1416660000	2782560000	1301310000	1321670000	2041900000	1880590000	2720700000	2170890000	1581880000	1253200000	2848680000	1565830000	1055750000	1854250000	1087690000	1183130000	1969060000	3	30	1.44428e+09	1.65547e+09	2.04652e+09	1.5141e+09	1.54447e+09	1.50178e+09	2.1881e+09	3.17933e+09	1.59665e+09	1.84055e+09	1.46445e+09	2.09515e+09	1.82187e+09	1.23372e+09	1.36377e+09	1.26555e+09	1.38257e+09	1.44821e+09	1.67773e+09	1.75423e+09	1.74685e+09	1.61161e+09	1.55946e+09	1.57388e+09	1.75654e+09	1.77622e+09	1.54884e+09
231	MAC_00550	7.51703	46839300	111003000	68674000	79605700	81980900	84616200	52597800	130273000	71871600	55996600	75238600	98734300	55531700	246089000	65122200	42457400	62150800	74528600	3	4	6.54036e+07	8.00527e+07	6.81961e+07	1.11157e+08	5.91226e+07	8.40274e+07	7.34445e+07	9.39497e+07	7.13715e+07	7.81904e+07	5.42602e+07	9.80473e+07	7.75412e+07	1.77473e+08	6.4669e+07	5.9285e+07	4.48216e+07	7.401e+07	7.59756e+07	8.48284e+07	5.82101e+07	1.18316e+08	5.96965e+07	8.80618e+07	5.89589e+07	5.24875e+07	6.92345e+07
232	MAC_00551	7.23767	62355100	125063000	164997000	66721100	135119000	132437000	74877300	185213000	116080000	72649700	114869000	151080000	83626300	104416000	110854000	61351300	121273000	128486000	3	11	9.46871e+07	1.03035e+08	1.31886e+08	1.01317e+08	1.1132e+08	1.0586e+08	1.13702e+08	1.52591e+08	9.27857e+07	1.1032e+08	9.46369e+07	1.20762e+08	1.26988e+08	8.6025e+07	8.86084e+07	9.31628e+07	9.9913e+07	1.02702e+08	1.09992e+08	1.09182e+08	1.12574e+08	1.07842e+08	1.12401e+08	1.10943e+08	9.12765e+07	8.52492e+07	9.00075e+07
233	MAC_00552	6.37662	NA	4633530	18960600	NA	6058460	16700600	NA	9754230	17564000	NA	5622250	17499700	NA	4470410	14048600	NA	4940230	16228800	2	4	NA	4633530	6.4378e+06	NA	6.05846e+06	5.67045e+06	NA	9.75423e+06	5.96361e+06	NA	5622250	5.94178e+06	NA	4470410	4.77e+06	NA	4940230	5.51026e+06	NA	4.90995e+06	5.49511e+06	NA	6.11727e+06	5.94271e+06	NA	5.44946e+06	5.78505e+06
234	MAC_00553	7.32023	33053100	45194600	41442100	43660000	49428200	34203600	55583900	89278600	34874700	46061400	40574000	40596500	47400400	36833100	28776500	33839200	42671400	35477800	3	5	3.25095e+07	3.91391e+07	4.86541e+07	4.2942e+07	4.28054e+07	4.01559e+07	5.46698e+07	7.73163e+07	4.09438e+07	4.53039e+07	3.51376e+07	4.76614e+07	4.66209e+07	3.18979e+07	3.37844e+07	3.32827e+07	3.69539e+07	4.16519e+07	3.77644e+07	4.1474e+07	4.15297e+07	4.57076e+07	4.32209e+07	4.20839e+07	4.38871e+07	4.31948e+07	3.97179e+07
235	MAC_00557	7.17354	56288900	31596600	72060500	58162500	40514300	61199900	84904700	69248300	68455600	76486300	34862500	68239000	80058900	33108300	52071700	46708900	29905400	66014600	3	6	4.66699e+07	4.50854e+07	6.09099e+07	4.82233e+07	5.78101e+07	5.17299e+07	7.03956e+07	9.88108e+07	5.78628e+07	6.34158e+07	4.97455e+07	5.76797e+07	6.63779e+07	4.72424e+07	4.40142e+07	3.8727e+07	4.26722e+07	5.57995e+07	5.42137e+07	4.77751e+07	5.19908e+07	5.13291e+07	5.83712e+07	5.42135e+07	5.65114e+07	5.52033e+07	5.61303e+07
236	MAC_00558	7.13897	45976900	63553600	95987900	45559400	50612800	64015500	59221300	98338100	65226700	55395500	47233200	79529500	58023500	44051100	63645900	40652600	57252400	62598400	3	11	5.40208e+07	6.48787e+07	8.00264e+07	5.35303e+07	5.16681e+07	5.33706e+07	6.95824e+07	1.00388e+08	5.43804e+07	6.50872e+07	4.8218e+07	6.63048e+07	6.8175e+07	4.49695e+07	5.30625e+07	4.7765e+07	5.84461e+07	5.21891e+07	6.27528e+07	6.87492e+07	6.83081e+07	5.69778e+07	5.21696e+07	5.5933e+07	5.58585e+07	5.60847e+07	5.27521e+07
237	MAC_00565	6.82399	42528500	22396900	66332700	45347300	16922800	41220100	46339700	25627900	26845900	45878700	16309700	53829000	47557200	15239900	41360100	41629500	19880300	41425700	3	7	3.16601e+07	3.92089e+07	5.08977e+07	3.37585e+07	2.96257e+07	3.16286e+07	3.44973e+07	4.48653e+07	2.05991e+07	3.41541e+07	2.85524e+07	4.13035e+07	3.54037e+07	2.66796e+07	3.1736e+07	3.09908e+07	3.48033e+07	3.17863e+07	3.67777e+07	4.1548e+07	4.34447e+07	3.59327e+07	2.99133e+07	3.31471e+07	2.76933e+07	2.50652e+07	1.99823e+07
238	MAC_00568	6.59581	39296800	55449700	52791500	45220600	57393200	46698500	64948900	118452000	54617500	53153900	54862200	59638700	51329800	45275900	43450600	37907600	47121800	46312200	3	11	4.29741e+07	4.87664e+07	5.489e+07	4.94522e+07	5.04756e+07	4.85548e+07	7.10266e+07	1.04175e+08	5.67886e+07	5.81279e+07	4.82497e+07	6.20094e+07	5.61331e+07	3.98188e+07	4.51778e+07	4.14549e+07	4.14422e+07	4.81531e+07	4.99205e+07	5.16757e+07	4.68524e+07	5.26371e+07	5.09656e+07	5.0886e+07	5.70179e+07	5.82002e+07	5.50882e+07
239	MAC_00569	6.91666	19027200	19385700	NA	21905900	26242500	NA	26937000	43983900	NA	22892500	22280800	NA	25819900	19500700	NA	18635600	22596000	NA	2	3	2.09392e+07	19385700	NA	2.41072e+07	26242500	NA	2.96439e+07	4.39839e+07	NA	2.5193e+07	22280800	NA	2.84145e+07	19500700	NA	2.05083e+07	22596000	NA	2.43239e+07	2.05422e+07	NA	2.56598e+07	2.64972e+07	NA	2.37972e+07	2.45728e+07	NA
240	MAC_00570	7.77932	165094000	164791000	148525000	176201000	165587000	179376000	170596000	321195000	241341000	201123000	193600000	187588000	220161000	149744000	178791000	113126000	123451000	141252000	3	6	1.6914e+08	1.62411e+08	1.47097e+08	1.80519e+08	1.63195e+08	1.77651e+08	1.74777e+08	3.16555e+08	2.3902e+08	2.06052e+08	1.90803e+08	1.85784e+08	2.25557e+08	1.47581e+08	1.77072e+08	1.15898e+08	1.21668e+08	1.39894e+08	1.9648e+08	1.721e+08	1.25557e+08	1.92145e+08	1.64779e+08	1.86181e+08	1.40305e+08	1.76852e+08	2.31864e+08
241	MAC_00571	6.4212	8731630	15688800	22274500	10239100	18098600	19211400	14105700	34312400	21040000	12553800	18216100	23219300	12402200	14231500	16958000	8379800	14422600	17606800	3	3	1.26927e+07	1.36098e+07	1.7664e+07	1.4884e+07	1.57002e+07	1.52349e+07	2.05046e+07	2.97655e+07	1.6685e+07	1.82487e+07	1.58022e+07	1.84132e+07	1.80284e+07	1.23456e+07	1.34479e+07	1.21812e+07	1.25114e+07	1.39624e+07	1.47443e+07	1.44217e+07	1.50774e+07	1.58426e+07	1.58526e+07	1.59664e+07	1.64605e+07	1.66293e+07	1.61854e+07
242	MAC_00573	7.67699	38994400	79349800	246075000	58126600	124745000	194897000	101994000	343450000	309675000	62449300	95937700	234766000	63102600	79135700	171989000	39322600	92464400	144769000	3	6	7.59166e+07	7.67268e+07	1.30717e+08	1.13164e+08	1.20621e+08	1.03531e+08	1.98568e+08	3.32097e+08	1.64502e+08	1.2158e+08	9.27664e+07	1.24709e+08	1.22852e+08	7.65198e+07	9.13619e+07	7.65556e+07	8.94079e+07	7.69024e+07	8.81879e+07	8.13041e+07	1.11576e+08	1.20452e+08	1.21792e+08	1.08502e+08	1.59404e+08	1.85535e+08	1.59576e+08
243	MAC_00574	7.00235	39857100	50784100	69421700	38890000	39305200	47564900	50492900	86482900	57471200	42326900	49641600	62991200	49134400	45861500	46090700	30961100	47100600	43254200	3	4	4.67071e+07	4.79107e+07	6.27932e+07	4.55738e+07	3.70813e+07	4.30233e+07	5.91709e+07	8.15897e+07	5.19838e+07	4.96014e+07	4.68329e+07	5.69767e+07	5.75789e+07	4.32666e+07	4.16899e+07	3.62822e+07	4.44356e+07	3.91242e+07	5.4257e+07	5.0769e+07	5.35984e+07	4.8509e+07	3.74412e+07	4.5089e+07	4.75005e+07	4.55823e+07	5.04273e+07
244	MAC_00575	6.86681	21923500	44421400	18738600	20442400	35421700	15029000	34884600	74980300	15094100	25279300	33255900	20665300	23393100	30302300	16580300	16987900	29745900	13716500	3	4	2.32433e+07	2.80261e+07	2.80142e+07	2.16731e+07	2.2348e+07	2.24684e+07	3.69847e+07	4.73061e+07	2.25657e+07	2.68012e+07	2.09816e+07	3.08946e+07	2.48014e+07	1.91181e+07	2.47876e+07	1.80106e+07	1.87671e+07	2.05062e+07	2.70004e+07	2.9698e+07	2.39121e+07	2.30689e+07	2.2565e+07	2.35471e+07	2.96901e+07	2.64288e+07	2.189e+07
245	MAC_00578	7.34572	41460000	85379300	106627000	46687500	100100000	94335400	60404800	160578000	94614100	54542300	83001600	105620000	59643700	75657700	75546900	40421000	80662300	81473100	3	6	6.29126e+07	6.86406e+07	8.74038e+07	7.08449e+07	8.04753e+07	7.73282e+07	9.16599e+07	1.29097e+08	7.75567e+07	8.2764e+07	6.67291e+07	8.65784e+07	9.0505e+07	6.0825e+07	6.1927e+07	6.1336e+07	6.48484e+07	6.67848e+07	7.30819e+07	7.27356e+07	7.46052e+07	7.54076e+07	8.12565e+07	8.10409e+07	7.35816e+07	7.21233e+07	7.52345e+07
246	MAC_00579	6.96845	16993300	4777700	19991300	22619400	5766080	15230100	30054100	10350100	16710500	22159300	4677590	18511900	23102700	3907830	13879000	18071700	5510980	15486900	3	3	9.81218e+06	1.08596e+07	1.5232e+07	1.30608e+07	1.31062e+07	1.16043e+07	1.73537e+07	2.35256e+07	1.27323e+07	1.27951e+07	1.06321e+07	1.41048e+07	1.33398e+07	8.88242e+06	1.05749e+07	1.04349e+07	1.25264e+07	1.18e+07	1.13982e+07	1.15075e+07	1.30016e+07	1.39019e+07	1.32334e+07	1.21615e+07	1.3931e+07	1.31432e+07	1.2351e+07
247	MAC_00580	6.87218	39029100	32522700	33675600	39610500	31972400	33180400	42316200	54396500	33690200	41439200	27712300	35356500	45566300	25957400	27466900	34257400	27170200	31620900	3	6	3.37049e+07	3.51278e+07	3.61033e+07	3.4207e+07	3.45334e+07	3.55724e+07	3.65436e+07	5.87536e+07	3.61189e+07	3.57862e+07	2.9932e+07	3.79054e+07	3.93503e+07	2.80366e+07	2.9447e+07	2.95841e+07	2.93465e+07	3.39005e+07	3.9153e+07	3.72234e+07	3.08167e+07	3.64101e+07	3.48686e+07	3.72803e+07	2.9336e+07	3.28243e+07	3.50375e+07
248	MAC_00581	7.26654	46004800	74597000	43964200	52711100	79761300	35945600	69335200	149536000	43907500	60418000	67143300	41041500	62864500	71284800	28922600	48655400	71023600	31503600	3	4	4.54784e+07	5.0467e+07	6.57372e+07	5.2108e+07	5.39607e+07	5.37474e+07	6.85419e+07	1.01165e+08	6.56524e+07	5.97267e+07	4.54243e+07	6.1367e+07	6.21452e+07	4.82262e+07	4.32463e+07	4.80987e+07	4.80494e+07	4.71056e+07	5.28296e+07	5.34777e+07	5.61112e+07	5.5464e+07	5.44845e+07	5.6328e+07	5.50232e+07	5.65187e+07	6.36866e+07
249	MAC_00583	6.78113	52446600	35107100	NA	59524700	31995100	NA	62409700	50002800	NA	71974900	32032700	NA	63022500	26497400	NA	52023500	33819400	NA	2	9	3.00054e+07	35107100	NA	3.40549e+07	31995100	NA	3.57054e+07	50002800	NA	4.11778e+07	32032700	NA	3.6056e+07	26497400	NA	2.97633e+07	33819400	NA	3.48555e+07	3.72015e+07	NA	3.62481e+07	3.23057e+07	NA	2.86632e+07	2.79354e+07	NA
250	MAC_00588	7.17036	21057900	72229000	40226800	40034400	160449000	59286900	64842700	318558000	77422300	41586700	101410000	51339000	44818400	108421000	48473900	20715500	65697300	34853000	3	6	3.50445e+07	3.65586e+07	4.77566e+07	6.66251e+07	8.12109e+07	7.03844e+07	1.07911e+08	1.61237e+08	9.19145e+07	6.92084e+07	5.13285e+07	6.09488e+07	7.45866e+07	5.48771e+07	5.75474e+07	3.44747e+07	3.32526e+07	4.13769e+07	4.07091e+07	3.87395e+07	4.07636e+07	7.0916e+07	8.19992e+07	7.37638e+07	8.66275e+07	9.00797e+07	8.91624e+07
251	MAC_00592	6.64798	17911600	42449500	17345100	17665700	34936200	15203100	24175900	69571500	16124800	20969200	32570900	18973600	20723000	27015000	14286200	13990700	28034800	14138700	3	4	2.11056e+07	2.56707e+07	2.43415e+07	2.08159e+07	2.11272e+07	2.13355e+07	2.8487e+07	4.20724e+07	2.2629e+07	2.47085e+07	1.96968e+07	2.66269e+07	2.44184e+07	1.63369e+07	2.00488e+07	1.64855e+07	1.69536e+07	1.98418e+07	2.45172e+07	2.72022e+07	2.07772e+07	2.21565e+07	2.13322e+07	2.23599e+07	2.28684e+07	2.35049e+07	2.19514e+07
252	MAC_00593	7.74549	192097000	268721000	442845000	221149000	323900000	404149000	313072000	587500000	473162000	268221000	269948000	440007000	264434000	227363000	331630000	175022000	248525000	361590000	3	28	2.51513e+08	2.71614e+08	3.34627e+08	2.89551e+08	3.27387e+08	3.05388e+08	4.09906e+08	5.93825e+08	3.57536e+08	3.51182e+08	2.72854e+08	3.32483e+08	3.46224e+08	2.29811e+08	2.5059e+08	2.29157e+08	2.512e+08	2.73229e+08	2.92168e+08	2.87818e+08	2.85628e+08	3.08199e+08	3.30565e+08	3.2005e+08	3.29059e+08	3.31756e+08	3.46831e+08
253	MAC_00594	6.77808	29699500	43936000	13744800	35544200	52933300	10951800	46603800	89673700	11801000	39303600	45246100	13386900	40046200	43147100	9510830	35729400	47551900	11611500	3	4	2.24785e+07	2.40443e+07	3.3184e+07	2.69021e+07	2.89682e+07	2.64408e+07	3.52728e+07	4.90746e+07	2.84911e+07	2.97475e+07	2.47613e+07	3.23199e+07	3.03096e+07	2.36126e+07	2.29619e+07	2.70423e+07	2.60232e+07	2.80335e+07	2.6112e+07	2.54788e+07	2.83248e+07	2.86347e+07	2.92494e+07	2.77103e+07	2.83158e+07	2.74169e+07	2.7638e+07
254	MAC_00596	6.56843	8697490	NA	13832700	9006690	NA	12341000	9800030	NA	11468500	10722400	NA	14001100	11464000	NA	9759450	7690110	NA	10661900	2	2	9.74834e+06	NA	1.23416e+07	1.00949e+07	NA	1.10107e+07	1.09841e+07	NA	1.02322e+07	1.20179e+07	NA	1.24918e+07	1.28491e+07	NA	8.70741e+06	8.61924e+06	NA	9.51257e+06	1.13241e+07	NA	1.05344e+07	1.0745e+07	NA	1.15393e+07	8.81767e+06	NA	9.92585e+06
255	MAC_00597	6.8098	23362800	16561200	46977300	24353700	18751400	42576700	30223900	31889800	43587100	27909900	17930000	45246100	33723200	17207500	35022500	20998600	16934000	39534700	3	5	2.45533e+07	2.3819e+07	3.10793e+07	2.55947e+07	2.6969e+07	2.8168e+07	3.1764e+07	4.58652e+07	2.88364e+07	2.93321e+07	2.57877e+07	2.9934e+07	3.54416e+07	2.47485e+07	2.31702e+07	2.20686e+07	2.43552e+07	2.61554e+07	2.85221e+07	2.524e+07	2.65284e+07	2.72431e+07	2.72308e+07	2.95204e+07	2.54991e+07	2.56239e+07	2.7973e+07
256	MAC_00598	7.10154	30740500	54531700	61268600	34862600	59708300	47181400	47279600	109324000	48718000	41288400	59078800	56612800	41346200	50096600	42260200	27846400	57154500	45080600	3	5	4.07196e+07	4.22432e+07	5.97087e+07	4.61798e+07	4.62532e+07	4.59802e+07	6.26277e+07	8.46882e+07	4.74777e+07	5.46916e+07	4.57656e+07	5.51715e+07	5.47682e+07	3.88075e+07	4.11843e+07	3.6886e+07	4.42749e+07	4.39329e+07	4.73016e+07	4.47633e+07	5.09655e+07	4.9154e+07	4.67022e+07	4.81878e+07	5.02755e+07	4.73133e+07	4.60561e+07
257	MAC_00599	7.74382	163958000	235827000	327610000	176430000	195687000	286665000	256559000	465149000	305659000	203258000	176194000	360582000	206981000	157687000	257119000	138050000	170120000	275135000	3	23	2.01247e+08	2.50972e+08	2.50801e+08	2.16555e+08	2.08254e+08	2.19455e+08	3.14908e+08	4.95022e+08	2.33996e+08	2.49485e+08	1.8751e+08	2.76042e+08	2.54054e+08	1.67814e+08	1.96837e+08	1.69446e+08	1.81045e+08	2.10629e+08	2.33777e+08	2.65945e+08	2.14076e+08	2.30502e+08	2.10276e+08	2.29992e+08	2.52798e+08	2.76557e+08	2.2699e+08
258	MAC_00600	6.90312	47232900	100188000	98751100	55759300	119252000	83774900	83705600	246670000	92205100	61834600	98491400	92579000	70537900	101594000	71597800	45106500	110395000	70335700	3	14	6.74838e+07	6.96953e+07	9.93571e+07	7.96659e+07	8.29571e+07	8.4289e+07	1.19594e+08	1.71595e+08	9.27709e+07	8.8346e+07	6.85151e+07	9.31471e+07	1.00781e+08	7.06734e+07	7.20372e+07	6.44458e+07	7.67958e+07	7.07673e+07	7.8392e+07	7.38532e+07	8.48082e+07	8.47967e+07	8.37623e+07	8.83359e+07	9.60063e+07	9.58661e+07	8.99932e+07
259	MAC_00602	7.26787	69700500	55301900	40650000	68316100	13457900	54763900	82044000	93596900	54718700	68274000	56520200	67331400	78960000	57628300	52029100	70574700	58849500	11506000	3	5	5.04445e+07	5.98059e+07	5.19372e+07	4.94426e+07	1.4554e+07	6.997e+07	5.93779e+07	1.0122e+08	6.99123e+07	4.94121e+07	6.11234e+07	8.60271e+07	5.71459e+07	6.23218e+07	6.64759e+07	5.10772e+07	6.36425e+07	1.47008e+07	5.85985e+07	6.33738e+07	4.4332e+07	5.26269e+07	1.46952e+07	7.33295e+07	4.76667e+07	5.65492e+07	6.7819e+07
260	MAC_00603	7.88349	146505000	116945000	86123900	114715000	24417500	121341000	288354000	392945000	198944000	164783000	121081000	212836000	117741000	87126300	180161000	106811000	91316600	54927600	3	8	1.23607e+08	1.4306e+08	8.34444e+07	9.67857e+07	2.98701e+07	1.17566e+08	2.43286e+08	4.80692e+08	1.92755e+08	1.39028e+08	1.48119e+08	2.06214e+08	9.93388e+07	1.06582e+08	1.74556e+08	9.01171e+07	1.11708e+08	5.32187e+07	1.43587e+08	1.51594e+08	7.12256e+07	1.03019e+08	3.016e+07	1.23211e+08	1.95302e+08	2.68552e+08	1.86983e+08
261	MAC_00604	6.83325	25781300	37528300	35321300	27272500	36492500	28916200	42369800	65125900	34574500	29380600	32920000	38297500	31984700	28271300	26139600	23766600	35064600	28708000	3	4	2.86483e+07	3.26084e+07	3.65824e+07	3.03053e+07	3.17084e+07	2.99486e+07	4.70815e+07	5.65881e+07	3.58089e+07	3.26478e+07	2.86043e+07	3.96648e+07	3.55415e+07	2.4565e+07	2.70729e+07	2.64095e+07	3.04677e+07	2.9733e+07	3.3279e+07	3.45538e+07	3.12256e+07	3.22571e+07	3.20162e+07	3.13865e+07	3.77955e+07	3.16145e+07	3.47367e+07
262	MAC_00606	7.50467	57703200	116456000	84609700	59450300	127752000	67124900	72694500	196962000	57543700	72768900	115931000	81285800	78032400	115289000	57259900	53464700	120882000	69001100	3	7	7.39378e+07	7.48989e+07	1.02669e+08	7.61764e+07	8.21639e+07	8.14523e+07	9.31468e+07	1.26676e+08	6.98261e+07	9.32422e+07	7.45612e+07	9.86358e+07	9.99865e+07	7.41483e+07	6.94817e+07	6.85068e+07	7.77455e+07	8.3729e+07	8.58892e+07	7.93672e+07	8.76353e+07	8.10825e+07	8.29615e+07	8.53631e+07	7.47753e+07	7.07712e+07	6.77354e+07
263	MAC_00607	6.69611	46094300	51707600	14918500	50936100	63056800	12448000	62182100	114668000	15181400	61264300	54517800	16238000	64185900	48679900	10592300	45768000	52468800	14154700	3	9	3.02755e+07	3.03042e+07	3.87555e+07	3.34556e+07	3.69556e+07	3.23376e+07	4.08422e+07	6.72033e+07	3.94385e+07	4.02394e+07	3.19512e+07	4.21833e+07	4.21583e+07	2.85298e+07	2.75168e+07	3.00611e+07	3.07503e+07	3.67713e+07	3.51692e+07	3.21121e+07	3.30805e+07	3.56103e+07	3.73143e+07	3.38902e+07	3.27868e+07	3.75449e+07	3.82576e+07
264	MAC_00608	7.28888	52180800	97865100	67147300	48637700	71164900	37439500	59421900	145335000	37570300	56182100	78787000	48160400	57816800	67558900	43135100	39612700	75086700	40482800	3	8	5.87814e+07	6.64532e+07	8.77832e+07	5.47901e+07	4.8323e+07	4.89455e+07	6.69385e+07	9.86866e+07	4.91165e+07	6.32888e+07	5.34986e+07	6.29612e+07	6.51303e+07	4.58744e+07	5.63915e+07	4.46235e+07	5.0986e+07	5.29241e+07	6.82829e+07	7.04176e+07	7.4929e+07	5.83188e+07	4.8792e+07	5.12955e+07	5.3736e+07	5.51339e+07	4.76459e+07
265	MAC_00609	8.00344	105168000	201962000	249316000	109354000	218016000	219253000	156920000	346495000	273862000	125684000	190125000	259022000	128613000	143793000	181976000	109958000	161871000	232997000	3	6	1.55018e+08	1.79156e+08	1.90674e+08	1.61188e+08	1.93397e+08	1.67682e+08	2.313e+08	3.07368e+08	2.09446e+08	1.85258e+08	1.68656e+08	1.98097e+08	1.89576e+08	1.27556e+08	1.39173e+08	1.62078e+08	1.43592e+08	1.78193e+08	1.80075e+08	1.89844e+08	1.62753e+08	1.71569e+08	1.95275e+08	1.75733e+08	1.8568e+08	1.7172e+08	2.03175e+08
266	MAC_00611	6.85644	40749200	58421800	27378100	44724000	59964200	21990100	44878800	84954300	21455600	47752100	55776700	25523200	57818100	56681600	20153900	41850300	53568800	22911400	3	7	3.5555e+07	3.85646e+07	4.75344e+07	3.90231e+07	3.95828e+07	3.81796e+07	3.91582e+07	5.60789e+07	3.72516e+07	4.16652e+07	3.68186e+07	4.43139e+07	5.04481e+07	3.74159e+07	3.49916e+07	3.65157e+07	3.53611e+07	3.97792e+07	4.13021e+07	4.08653e+07	4.05739e+07	4.15364e+07	3.9967e+07	4.00127e+07	3.14349e+07	3.133e+07	3.61362e+07
267	MAC_00615	7.8246	141286000	196066000	258880000	132425000	158743000	211591000	171419000	224887000	207766000	157975000	137677000	281812000	168329000	113846000	203950000	115220000	120096000	211572000	3	10	1.66338e+08	2.1982e+08	1.96128e+08	1.55906e+08	1.77975e+08	1.60302e+08	2.01814e+08	2.52133e+08	1.57404e+08	1.85986e+08	1.54357e+08	2.13502e+08	1.98176e+08	1.27639e+08	1.54513e+08	1.3565e+08	1.34646e+08	1.60288e+08	1.93225e+08	2.32934e+08	1.67409e+08	1.65947e+08	1.79703e+08	1.67998e+08	1.6201e+08	1.40861e+08	1.52691e+08
268	MAC_00617	6.34024	9532610	15428200	30677100	10245300	14912200	25045600	13880000	29025400	28349500	12630100	12916100	29969700	12413200	12075200	22874100	9593420	13688800	23486500	3	4	1.41362e+07	1.65449e+07	1.92905e+07	1.51931e+07	1.59915e+07	1.57493e+07	2.05831e+07	3.11262e+07	1.78269e+07	1.87296e+07	1.3851e+07	1.88457e+07	1.84079e+07	1.29492e+07	1.43838e+07	1.42264e+07	1.46796e+07	1.47689e+07	1.64212e+07	1.75319e+07	1.64658e+07	1.61716e+07	1.61468e+07	1.65055e+07	1.65234e+07	1.73895e+07	1.72931e+07
269	MAC_00618	6.85108	57270500	68973100	74662900	64109400	69898100	53896100	77438100	122963000	60245600	63554100	74757100	67943800	76374600	71736100	49911900	65079900	73969500	48315200	3	9	5.7739e+07	5.9231e+07	8.62377e+07	6.46339e+07	6.00253e+07	6.22515e+07	7.80716e+07	1.05595e+08	6.95853e+07	6.4074e+07	6.4198e+07	7.84769e+07	7.69994e+07	6.16037e+07	5.76496e+07	6.56123e+07	6.35217e+07	5.58054e+07	6.70721e+07	6.27646e+07	7.36098e+07	6.87965e+07	6.0608e+07	6.52403e+07	6.26734e+07	5.89935e+07	6.75018e+07
270	MAC_00619	6.35214	7783800	9542990	13062200	9747200	11464100	11309800	11169700	18180100	10568900	9991910	9721150	12869200	9743150	8346330	10432100	6531190	9521070	9781930	3	3	8.88623e+06	9.14883e+06	1.19346e+07	1.11277e+07	1.09906e+07	1.03335e+07	1.27517e+07	1.74292e+07	9.65657e+06	1.14071e+07	9.31964e+06	1.17583e+07	1.11231e+07	8.0016e+06	9.53158e+06	7.45621e+06	9.12782e+06	8.93753e+06	1.03226e+07	9.69463e+06	1.0187e+07	1.18444e+07	1.10973e+07	1.08296e+07	1.02366e+07	9.73729e+06	9.36743e+06
271	MAC_00620	7.05051	NA	37484600	81364700	NA	36962800	64180100	NA	60092200	65048100	NA	32945100	82731200	NA	28644700	57938700	NA	30165300	62977400	2	5	NA	37484600	4.3426e+07	NA	36962800	3.42543e+07	NA	60092200	3.47175e+07	NA	32945100	4.41554e+07	NA	28644700	3.09231e+07	NA	30165300	3.36123e+07	NA	3.97208e+07	3.70671e+07	NA	3.73216e+07	3.58989e+07	NA	3.35721e+07	3.3678e+07
272	MAC_00623	7.42663	142627000	180768000	176328000	162310000	205879000	139129000	221829000	406023000	139802000	175025000	163639000	164655000	186540000	150021000	122039000	142125000	171132000	132125000	3	11	1.42768e+08	1.53684e+08	2.07198e+08	1.62471e+08	1.75032e+08	1.63486e+08	2.22049e+08	3.45189e+08	1.64277e+08	1.75199e+08	1.39121e+08	1.93481e+08	1.86725e+08	1.27543e+08	1.43404e+08	1.42266e+08	1.45491e+08	1.55256e+08	1.65846e+08	1.62852e+08	1.76857e+08	1.72935e+08	1.76731e+08	1.71336e+08	1.78254e+08	1.92849e+08	1.59358e+08
273	MAC_00625	7.0856	31065500	59793500	110487000	40606600	69282400	93341400	61050200	144873000	106498000	50595200	55939500	112763000	43930700	46329700	81661400	31787300	53132800	83780900	3	7	4.78317e+07	5.85023e+07	7.33424e+07	6.25222e+07	6.77863e+07	6.19609e+07	9.39993e+07	1.41745e+08	7.06944e+07	7.79017e+07	5.47315e+07	7.48532e+07	6.76403e+07	4.53292e+07	5.42076e+07	4.89431e+07	5.19854e+07	5.56146e+07	5.55633e+07	6.19924e+07	6.26028e+07	6.65488e+07	6.84442e+07	6.49358e+07	7.54596e+07	7.91894e+07	6.85777e+07
274	MAC_00626	7.24347	59735900	120941000	84339000	72446600	132353000	83073200	98014800	237417000	91217400	76337900	107475000	84683400	82402500	96837300	66970900	56661100	112076000	73190000	3	11	7.43552e+07	8.57276e+07	9.55885e+07	9.01766e+07	9.38169e+07	9.41538e+07	1.22002e+08	1.6829e+08	1.03384e+08	9.50202e+07	7.61824e+07	9.59788e+07	1.02569e+08	6.8642e+07	7.59037e+07	7.05279e+07	7.94438e+07	8.29524e+07	8.63741e+07	9.08419e+07	8.15914e+07	9.59843e+07	9.47275e+07	9.86744e+07	9.79394e+07	9.40199e+07	1.00289e+08
275	MAC_00627	7.07452	37044400	70739700	22824400	39621800	84675600	20164800	48335600	103489000	19625100	46369100	72214300	21939100	53775600	59422200	15276300	32993600	59028900	21439500	3	5	3.46421e+07	3.82162e+07	4.51786e+07	3.70524e+07	4.57449e+07	3.99142e+07	4.52011e+07	5.59086e+07	3.88459e+07	4.33621e+07	3.90128e+07	4.34263e+07	5.02883e+07	3.21021e+07	3.02379e+07	3.0854e+07	3.18896e+07	4.24374e+07	4.02417e+07	4.04961e+07	3.85631e+07	3.94387e+07	4.61889e+07	4.18306e+07	3.6286e+07	3.12348e+07	3.76828e+07
276	MAC_00628	7.49571	77282800	139143000	239433000	87009900	161353000	204703000	100124000	221887000	224653000	92776900	140621000	242426000	102387000	121340000	174005000	80632600	127630000	188211000	3	7	1.21739e+08	1.31919e+08	1.60322e+08	1.37061e+08	1.52976e+08	1.37067e+08	1.57719e+08	2.10367e+08	1.50425e+08	1.46145e+08	1.3332e+08	1.62326e+08	1.61284e+08	1.1504e+08	1.16512e+08	1.27015e+08	1.21004e+08	1.26024e+08	1.41417e+08	1.39789e+08	1.36846e+08	1.45888e+08	1.54461e+08	1.43648e+08	1.26612e+08	1.17527e+08	1.45921e+08
277	MAC_00629	7.05457	15709800	66182400	28741800	16331200	67068300	24449300	26149900	130854000	28606800	20226100	53035200	28497700	20059800	45959900	21669600	14353500	47139400	26305900	3	5	2.6729e+07	3.25688e+07	3.43275e+07	2.77863e+07	3.30048e+07	2.92008e+07	4.44921e+07	6.43942e+07	3.41662e+07	3.44132e+07	2.6099e+07	3.40359e+07	3.41302e+07	2.26172e+07	2.58809e+07	2.44214e+07	2.31976e+07	3.14182e+07	3.10496e+07	3.45118e+07	2.93009e+07	2.95758e+07	3.33251e+07	3.06028e+07	3.57168e+07	3.59755e+07	3.31432e+07
278	MAC_00630	6.27959	6412740	15341900	8088310	8053890	18815700	6507450	11824900	37351500	7416140	9124410	15278500	7222910	9126710	14417500	5239570	6422100	15794200	5090790	3	5	7.6924e+06	8.34722e+06	1.2393e+07	9.66104e+06	1.02372e+07	9.97079e+06	1.41846e+07	2.03222e+07	1.13631e+07	1.09452e+07	8.31273e+06	1.1067e+07	1.09479e+07	7.84427e+06	8.02813e+06	7.70363e+06	8.59331e+06	7.80017e+06	8.93581e+06	8.8452e+06	1.05783e+07	1.02832e+07	1.03366e+07	1.04495e+07	1.13869e+07	1.13535e+07	1.10229e+07
279	MAC_00631	7.90639	226743000	452231000	361708000	227407000	432605000	297146000	355900000	846811000	326756000	285611000	400794000	421038000	282553000	327180000	298410000	188753000	335843000	281697000	3	11	2.95283e+08	3.41945e+08	3.67331e+08	2.96148e+08	3.27106e+08	3.01765e+08	4.63482e+08	6.40299e+08	3.31835e+08	3.71946e+08	3.03052e+08	4.27583e+08	3.67963e+08	2.47391e+08	3.03049e+08	2.45809e+08	2.53941e+08	2.86076e+08	3.43013e+08	3.62345e+08	3.13542e+08	3.15221e+08	3.30281e+08	3.16253e+08	3.72068e+08	3.5772e+08	3.21899e+08
280	MAC_00633	7.41434	203511000	159346000	225970000	216286000	176260000	184353000	255354000	276716000	192925000	237468000	146203000	198993000	260447000	134504000	149128000	199595000	156086000	173833000	3	23	1.72569e+08	1.81199e+08	2.34348e+08	1.83401e+08	2.00433e+08	1.91188e+08	2.16529e+08	3.14666e+08	2.00078e+08	2.01363e+08	1.66254e+08	2.06371e+08	2.20848e+08	1.5295e+08	1.54657e+08	1.69248e+08	1.77492e+08	1.80278e+08	2.00463e+08	1.92009e+08	2.00032e+08	1.95213e+08	2.02379e+08	2.00367e+08	1.73823e+08	1.75797e+08	1.94087e+08
281	MAC_00635	6.60444	13416100	29579000	39432700	15403100	32869300	37003500	20984700	58287600	39674300	16886100	30115100	40422200	17364300	27563900	31187100	11979900	45225500	34187300	3	5	2.34322e+07	2.26807e+07	2.94439e+07	2.69027e+07	2.52037e+07	2.763e+07	3.66514e+07	4.46941e+07	2.96243e+07	2.94928e+07	2.30918e+07	3.01827e+07	3.03281e+07	2.11356e+07	2.3287e+07	2.09238e+07	3.46783e+07	2.55272e+07	2.72199e+07	2.40338e+07	2.51324e+07	2.86353e+07	2.54483e+07	2.89566e+07	2.94225e+07	2.49696e+07	2.87373e+07
282	MAC_00636	7.20414	28485400	51661900	41418500	33963700	53635100	35582700	56789800	104507000	39395600	39935000	44986100	47568100	43134300	38881900	34770400	28508000	44877800	30861400	3	4	3.22335e+07	4.09821e+07	4.61408e+07	3.84327e+07	4.25474e+07	3.96396e+07	6.42623e+07	8.29028e+07	4.38872e+07	4.51897e+07	3.56864e+07	5.29915e+07	4.881e+07	3.0844e+07	3.87347e+07	3.22591e+07	3.56004e+07	3.438e+07	3.74438e+07	4.3427e+07	3.93843e+07	4.09079e+07	4.29604e+07	4.15428e+07	5.15877e+07	4.63159e+07	4.25732e+07
283	MAC_00637	7.32145	132736000	213031000	228172000	142986000	232565000	194679000	181841000	367973000	196356000	160871000	218268000	213445000	170871000	203080000	153123000	133472000	219311000	186566000	3	24	1.66449e+08	1.72082e+08	2.25256e+08	1.79303e+08	1.87861e+08	1.92191e+08	2.28027e+08	2.9724e+08	1.93847e+08	2.0173e+08	1.76312e+08	2.10717e+08	2.1427e+08	1.64043e+08	1.51166e+08	1.67372e+08	1.77155e+08	1.84182e+08	1.93355e+08	1.82348e+08	1.92272e+08	1.90851e+08	1.89684e+08	2.01419e+08	1.83052e+08	1.66061e+08	1.88043e+08
284	MAC_00638	7.78229	291731000	211717000	87061000	137375000	161265000	37956600	91540600	176301000	32041900	149391000	161690000	49612700	210514000	171812000	40640800	178722000	216000000	60397900	3	6	1.99763e+08	1.32042e+08	2.03862e+08	9.40675e+07	1.00576e+08	8.8879e+07	6.26824e+07	1.09954e+08	7.50292e+07	1.02295e+08	1.00842e+08	1.16173e+08	1.44149e+08	1.07154e+08	9.51643e+07	1.2238e+08	1.34713e+08	1.41427e+08	2.32053e+08	1.39919e+08	1.7401e+08	1.00126e+08	1.01553e+08	9.31463e+07	5.03194e+07	6.14288e+07	7.27827e+07
285	MAC_00639	7.01219	24925900	65216600	57658400	27126900	60071500	40717000	33135400	102292000	41626000	29747100	52935700	50479000	30914800	53939900	36627300	25115600	64426600	37521000	3	4	3.78767e+07	4.33641e+07	5.70648e+07	4.12213e+07	3.9943e+07	4.02978e+07	5.03517e+07	6.80165e+07	4.11975e+07	4.52029e+07	3.51983e+07	4.99593e+07	4.69773e+07	3.5866e+07	3.62502e+07	3.8165e+07	4.28388e+07	3.71347e+07	4.39992e+07	4.59511e+07	4.87088e+07	4.38761e+07	4.03308e+07	4.22326e+07	4.04207e+07	3.79993e+07	3.99639e+07
286	MAC_00640	6.99739	21388000	39748000	33253700	22825300	31596800	31886500	30294800	52852700	26447100	26325900	25595400	35367600	26124400	20889200	25277900	20723600	23747000	31725400	3	3	2.48684e+07	3.66844e+07	3.09882e+07	2.65396e+07	2.91615e+07	2.97141e+07	3.52246e+07	4.87791e+07	2.46453e+07	3.06098e+07	2.36226e+07	3.29581e+07	3.03755e+07	1.92792e+07	2.35558e+07	2.40959e+07	2.19167e+07	2.9564e+07	2.88882e+07	3.88729e+07	2.64506e+07	2.82488e+07	2.94445e+07	3.11408e+07	2.82771e+07	2.72517e+07	2.39074e+07
287	MAC_00641	7.40125	74157900	124916000	86464400	83978500	139723000	74097600	120233000	250720000	77044700	96572500	119308000	88523000	102463000	104671000	66392200	67010800	106947000	68477700	3	8	8.08253e+07	9.02687e+07	1.09781e+08	9.15288e+07	1.00969e+08	9.40796e+07	1.31043e+08	1.81179e+08	9.78214e+07	1.05255e+08	8.62161e+07	1.12395e+08	1.11675e+08	7.56389e+07	8.42962e+07	7.30356e+07	7.72836e+07	8.69441e+07	9.389e+07	9.56539e+07	9.3706e+07	9.74236e+07	1.01949e+08	9.85966e+07	1.05197e+08	1.01221e+08	9.48924e+07
288	MAC_00642	6.93245	54492800	32624400	24481400	61041500	35956600	17523100	73217200	65016800	19903500	63661500	33360500	21060300	77292100	33709400	16950300	54682200	35305300	17129900	3	5	3.09037e+07	3.08857e+07	4.55985e+07	3.46175e+07	3.40403e+07	3.26381e+07	4.15225e+07	6.15518e+07	3.70718e+07	3.61034e+07	3.15826e+07	3.92264e+07	4.38335e+07	3.19129e+07	3.15712e+07	3.10111e+07	3.34237e+07	3.19058e+07	3.5899e+07	3.27283e+07	3.89215e+07	3.6847e+07	3.43707e+07	3.42052e+07	3.33329e+07	3.43876e+07	3.59618e+07
289	MAC_00643	6.09183	49518000	42412500	NA	55300900	44087300	NA	74527600	74966200	NA	60614800	37251300	NA	62777100	32531000	NA	48873500	38406200	NA	2	2	3.69236e+07	42412500	NA	4.12357e+07	44087300	NA	5.55723e+07	74966200	NA	4.51981e+07	37251300	NA	4.68104e+07	32531000	NA	3.6443e+07	38406200	NA	4.2892e+07	4.49427e+07	NA	4.38914e+07	4.45152e+07	NA	4.46116e+07	4.18819e+07	NA
290	MAC_00650	7.40435	84864000	88190400	142949000	94431400	84436300	113509000	123291000	145168000	120193000	108474000	78978700	157098000	112351000	74069200	115535000	79396700	86398200	106943000	3	9	8.88027e+07	1.01303e+08	1.18926e+08	9.88141e+07	9.69912e+07	9.44332e+07	1.29013e+08	1.66753e+08	9.99939e+07	1.13508e+08	9.07221e+07	1.30697e+08	1.17565e+08	8.50826e+07	9.61187e+07	8.30817e+07	9.92448e+07	8.89706e+07	1.03157e+08	1.07347e+08	1.01511e+08	1.05178e+08	9.79327e+07	9.89671e+07	1.03568e+08	9.31611e+07	9.69999e+07
291	MAC_00651	7.61303	61194000	112309000	250698000	60171900	132334000	179209000	82581800	230417000	192101000	73147400	117368000	247109000	80268700	102537000	170484000	53480900	115264000	178948000	3	8	1.09241e+08	1.04543e+08	1.50867e+08	1.07417e+08	1.23183e+08	1.07846e+08	1.47422e+08	2.14483e+08	1.15604e+08	1.3058e+08	1.09252e+08	1.48707e+08	1.43293e+08	9.54464e+07	1.02595e+08	9.54721e+07	1.07293e+08	1.07689e+08	1.26899e+08	1.10779e+08	1.28775e+08	1.14335e+08	1.24379e+08	1.13024e+08	1.18346e+08	1.19827e+08	1.12143e+08
292	MAC_00653	7.35386	27387600	82679200	79770600	26503500	87064800	65058200	40963200	175841000	79152500	30906600	73551400	81284100	33254300	65255100	53198600	23339600	74408500	59717800	3	4	5.17494e+07	5.33036e+07	6.54834e+07	5.00788e+07	5.6131e+07	5.34061e+07	7.74007e+07	1.13365e+08	6.4976e+07	5.83986e+07	4.74189e+07	6.67258e+07	6.28346e+07	4.20702e+07	4.36705e+07	4.41006e+07	4.79715e+07	4.90221e+07	6.01142e+07	5.64836e+07	5.58946e+07	5.33041e+07	5.66759e+07	5.59702e+07	6.21348e+07	6.33347e+07	6.30305e+07
293	MAC_00654	6.87592	48094600	39916400	20569700	49996100	38438400	16107800	67545200	77823600	16443100	57664800	34986400	17827500	66692000	34433200	15143800	43515100	36861800	13739900	3	8	2.94339e+07	3.20773e+07	4.18243e+07	3.05977e+07	3.08896e+07	3.2752e+07	4.13377e+07	6.25401e+07	3.34337e+07	3.52909e+07	2.81155e+07	3.62486e+07	4.08156e+07	2.7671e+07	3.07919e+07	2.66313e+07	2.96226e+07	2.79373e+07	3.41917e+07	3.3991e+07	3.57e+07	3.25683e+07	3.11894e+07	3.43245e+07	3.31846e+07	3.49397e+07	3.24327e+07
294	MAC_00656	6.57899	20023100	46651400	6814820	21440800	54469000	6137490	29574500	97178900	6436650	25160700	46627800	6816910	26818500	44151500	4490740	18217300	46911900	5720970	3	5	1.68781e+07	1.70073e+07	2.21763e+07	1.80732e+07	1.98573e+07	1.99722e+07	2.49293e+07	3.54278e+07	2.09457e+07	2.12088e+07	1.69987e+07	2.21831e+07	2.26062e+07	1.6096e+07	1.46135e+07	1.5356e+07	1.71023e+07	1.86168e+07	1.96063e+07	1.8022e+07	1.8929e+07	1.92371e+07	2.00501e+07	2.09311e+07	2.00125e+07	1.97927e+07	2.03185e+07
295	MAC_00657	7.43504	65280300	120887000	175697000	72464200	123835000	119325000	82746800	195769000	113866000	79372200	108216000	144884000	84815100	99855600	115864000	60253900	114530000	123452000	3	9	9.40255e+07	1.03367e+08	1.42659e+08	1.04373e+08	1.05888e+08	9.68871e+07	1.19183e+08	1.67396e+08	9.24546e+07	1.14323e+08	9.25324e+07	1.1764e+08	1.22162e+08	8.53836e+07	9.40769e+07	8.67858e+07	9.79313e+07	1.00238e+08	1.09224e+08	1.09534e+08	1.21769e+08	1.11095e+08	1.06916e+08	1.01539e+08	9.56763e+07	9.35205e+07	8.96863e+07
296	MAC_00662	7.07909	51457000	109193000	36703300	32545100	88664600	17758200	31273500	105722000	15022000	43534900	83159600	22912600	51653100	83133000	20219600	28474600	84957600	24541200	3	7	5.68168e+07	5.07742e+07	7.14866e+07	3.5935e+07	4.12286e+07	3.45874e+07	3.4531e+07	4.91602e+07	2.92582e+07	4.80695e+07	3.86688e+07	4.46266e+07	5.70333e+07	3.86565e+07	3.93815e+07	3.14405e+07	3.95049e+07	4.77986e+07	6.60007e+07	5.38033e+07	6.10187e+07	3.82493e+07	4.16288e+07	3.62481e+07	2.77203e+07	2.74647e+07	2.83821e+07
297	MAC_00663	6.9798	51956100	44886600	119802000	59166400	55922100	108274000	83008600	105447000	127153000	69998600	51054700	116717000	75391200	42262800	85265000	54885100	44863800	93438400	3	10	5.79757e+07	5.97593e+07	8.06429e+07	6.60214e+07	7.44513e+07	7.2883e+07	9.26259e+07	1.40386e+08	8.55911e+07	7.81086e+07	6.79711e+07	7.85662e+07	8.4126e+07	5.62661e+07	5.73948e+07	6.12441e+07	5.97289e+07	6.28966e+07	6.7347e+07	6.33244e+07	6.88343e+07	7.02734e+07	7.51739e+07	7.63823e+07	7.43571e+07	7.84303e+07	8.30283e+07
298	MAC_00664	6.41373	NA	8555170	12409800	NA	10002500	10014800	NA	19391500	11710600	NA	9015560	11538800	NA	8527930	8824920	NA	8407210	8037130	2	2	NA	8555170	1.21949e+07	NA	10002500	9.84136e+06	NA	19391500	1.15078e+07	NA	9015560	1.1339e+07	NA	8527930	8.67209e+06	NA	8407210	7.89794e+06	NA	9.06555e+06	1.04092e+07	NA	1.00996e+07	1.03139e+07	NA	1.08336e+07	1.11632e+07
299	MAC_00667	7.51915	94577600	121955000	169015000	105593000	123404000	151329000	161424000	231824000	169336000	128123000	106346000	217240000	132986000	81784500	158524000	87990100	80446200	148473000	3	11	1.07022e+08	1.37773e+08	1.32213e+08	1.19487e+08	1.3941e+08	1.18378e+08	1.82664e+08	2.61893e+08	1.32464e+08	1.44982e+08	1.2014e+08	1.69937e+08	1.50485e+08	9.23923e+07	1.24006e+08	9.9568e+07	9.08804e+07	1.16144e+08	1.24322e+08	1.45992e+08	1.12853e+08	1.27183e+08	1.40763e+08	1.24062e+08	1.46637e+08	1.46313e+08	1.28498e+08
300	MAC_00669	7.48229	87140300	67666300	158823000	103850000	75356000	139241000	130822000	125357000	141979000	117938000	67663800	159034000	123468000	59018800	109415000	90397600	66998000	130271000	3	9	8.38598e+07	9.41119e+07	1.18661e+08	9.99404e+07	1.04807e+08	1.0403e+08	1.25897e+08	1.74349e+08	1.06076e+08	1.13498e+08	9.41084e+07	1.18818e+08	1.1882e+08	8.20847e+07	8.17467e+07	8.69945e+07	9.31824e+07	9.73287e+07	9.7415e+07	9.97264e+07	1.01285e+08	1.06377e+08	1.05824e+08	1.09025e+08	1.01066e+08	9.7405e+07	1.029e+08
301	MAC_00670	7.22935	26950600	45107700	60667800	28339300	54761200	53276800	37235200	97808600	58491300	31893900	43656200	58459400	34977700	44117500	44381000	24767900	47744900	48672200	3	4	3.92255e+07	3.76143e+07	4.99868e+07	4.12467e+07	4.56642e+07	4.3897e+07	5.41944e+07	8.15605e+07	4.81935e+07	4.64203e+07	3.6404e+07	4.81672e+07	5.09086e+07	3.67886e+07	3.65674e+07	3.60487e+07	3.98134e+07	4.01031e+07	4.5566e+07	3.98583e+07	4.26672e+07	4.39032e+07	4.61074e+07	4.60046e+07	4.35055e+07	4.5566e+07	4.67505e+07
302	MAC_00671	7.39853	109662000	73708700	219299000	118858000	61538700	189908000	164667000	119973000	201641000	126618000	60097000	214955000	136875000	56772300	157287000	106235000	65268400	161326000	3	12	1.03538e+08	1.2439e+08	1.37634e+08	1.12221e+08	1.03852e+08	1.19188e+08	1.55471e+08	2.02465e+08	1.26552e+08	1.19547e+08	1.01419e+08	1.34908e+08	1.29231e+08	9.58083e+07	9.87149e+07	1.00302e+08	1.10146e+08	1.0125e+08	1.20274e+08	1.31811e+08	1.1748e+08	1.19448e+08	1.0486e+08	1.24911e+08	1.24807e+08	1.13113e+08	1.22763e+08
303	MAC_00673	7.16991	29086600	44570400	79579300	33839900	47194600	68372000	44699700	82887600	78676400	36959700	40795900	79039500	38419500	38028900	55485900	33523900	43697400	59456200	3	4	3.99368e+07	4.58635e+07	5.63247e+07	4.64632e+07	4.85639e+07	4.83924e+07	6.1374e+07	8.52925e+07	5.56857e+07	5.07468e+07	4.19795e+07	5.59427e+07	5.27511e+07	3.91323e+07	3.92719e+07	4.60293e+07	4.49652e+07	4.2082e+07	4.63922e+07	4.85997e+07	4.80771e+07	4.94556e+07	4.90353e+07	5.07158e+07	4.92691e+07	4.76509e+07	5.40183e+07
304	MAC_00676	7.14043	79972200	56965400	91967400	96858900	69501000	81218200	119861000	101276000	78958600	109931000	54573600	95940800	116876000	50653200	68973600	84805900	54160400	83287300	3	10	6.41799e+07	7.32002e+07	8.91811e+07	7.77319e+07	8.93084e+07	7.87576e+07	9.61917e+07	1.30139e+08	7.65665e+07	8.82226e+07	7.01267e+07	9.30342e+07	9.37962e+07	6.50891e+07	6.6884e+07	6.8059e+07	6.95958e+07	8.0764e+07	7.4554e+07	7.75671e+07	7.61223e+07	8.27381e+07	9.01753e+07	8.25389e+07	7.72196e+07	7.27057e+07	7.42739e+07
305	MAC_00679	6.82289	16017100	45297400	NA	18970500	53110200	NA	24949900	91382100	NA	20618900	45106400	NA	22283700	39471900	NA	16553500	44173000	NA	2	8	4.14385e+07	45297400	NA	4.90794e+07	53110200	NA	6.45489e+07	91382100	NA	5.3344e+07	45106400	NA	5.76511e+07	39471900	NA	4.28263e+07	44173000	NA	4.81367e+07	4.79997e+07	NA	5.22403e+07	5.36257e+07	NA	5.18178e+07	5.10531e+07	NA
306	MAC_00682	7.97935	224747000	387771000	418103000	221701000	256328000	349484000	301952000	496964000	352117000	269298000	246521000	445730000	253670000	198349000	324525000	181093000	224063000	356180000	3	13	2.76398e+08	3.9917e+08	3.30263e+08	2.72652e+08	2.63863e+08	2.7606e+08	3.71346e+08	5.11573e+08	2.7814e+08	3.31187e+08	2.53768e+08	3.52086e+08	3.11968e+08	2.0418e+08	2.56345e+08	2.22711e+08	2.3065e+08	2.8135e+08	3.21075e+08	4.22984e+08	2.81902e+08	2.90212e+08	2.66424e+08	2.89315e+08	2.98104e+08	2.85804e+08	2.69812e+08
307	MAC_00684	7.79135	225011000	362834000	357544000	253492000	362220000	291986000	338220000	701609000	302049000	287712000	322407000	368354000	304637000	291771000	259391000	206851000	309290000	281276000	3	25	2.64675e+08	3.03912e+08	3.62894e+08	2.98177e+08	3.03397e+08	2.96355e+08	3.97841e+08	5.87672e+08	3.06569e+08	3.38429e+08	2.7005e+08	3.73866e+08	3.58338e+08	2.44389e+08	2.63272e+08	2.43314e+08	2.59063e+08	2.85485e+08	3.07458e+08	3.22042e+08	3.09755e+08	3.17381e+08	3.06342e+08	3.10584e+08	3.19374e+08	3.28319e+08	2.9739e+08
308	MAC_00685	7.40122	46438100	72168900	93501400	42377500	72173100	60151500	50019700	130317000	64051000	45982000	72904200	68868500	62276400	72539800	48804400	49351800	78906500	54557300	3	3	5.98649e+07	5.63007e+07	9.29729e+07	5.46302e+07	5.6304e+07	5.98115e+07	6.44821e+07	1.01664e+08	6.3689e+07	5.92769e+07	5.68744e+07	6.84792e+07	8.02826e+07	5.65901e+07	4.85285e+07	6.3621e+07	6.15569e+07	5.42489e+07	6.95416e+07	5.96595e+07	7.93588e+07	5.81486e+07	5.68505e+07	6.26832e+07	5.17641e+07	5.67971e+07	6.1782e+07
309	MAC_00687	6.57661	4344470	14879500	10097400	4670970	15937300	8769830	4629780	21377800	8433370	5839980	14745100	10518700	6048220	11786300	7889230	3694610	11451800	9156520	3	2	7.80592e+06	8.7334e+06	9.57475e+06	8.39256e+06	9.35427e+06	8.31589e+06	8.31855e+06	1.25475e+07	7.99685e+06	1.0493e+07	8.65452e+06	9.97424e+06	1.08671e+07	6.91787e+06	7.48087e+06	6.63828e+06	6.72154e+06	8.68257e+06	9.06768e+06	9.25441e+06	8.17271e+06	8.93307e+06	9.44507e+06	8.71516e+06	6.67786e+06	7.01001e+06	7.75741e+06
310	MAC_00689	6.69905	24883100	24955900	13112600	25829200	22674700	9923930	37175800	44308000	11347600	31455600	20828700	12339000	33420000	18173100	9098640	23807500	20528100	10097200	3	3	1.68661e+07	2.0392e+07	2.36751e+07	1.75074e+07	1.8528e+07	1.79179e+07	2.51983e+07	3.6205e+07	2.04884e+07	2.1321e+07	1.70196e+07	2.22784e+07	2.26525e+07	1.48496e+07	1.64278e+07	1.6137e+07	1.67739e+07	1.82307e+07	1.95924e+07	2.16085e+07	2.02084e+07	1.86349e+07	1.87078e+07	1.87782e+07	2.02283e+07	2.02269e+07	1.98749e+07
311	MAC_00691	6.37313	18639800	33512300	10080900	19009100	29841800	7315690	23830600	51391400	6892860	21483700	27089200	9508480	25915800	23190200	7017240	17860100	24304700	7945160	3	4	1.53403e+07	1.90032e+07	2.16015e+07	1.56442e+07	1.69218e+07	1.56762e+07	1.96122e+07	2.91416e+07	1.47701e+07	1.76808e+07	1.5361e+07	2.03749e+07	2.13283e+07	1.315e+07	1.50367e+07	1.46986e+07	1.3782e+07	1.7025e+07	1.78199e+07	2.01369e+07	1.84384e+07	1.66517e+07	1.70861e+07	1.64288e+07	1.57441e+07	1.62807e+07	1.43279e+07
312	MAC_00692	7.54853	106331000	169754000	205070000	122771000	188415000	180278000	161875000	338651000	198834000	135874000	156591000	201041000	136210000	144923000	150746000	98548000	168172000	159874000	3	12	1.37264e+08	1.47564e+08	1.82745e+08	1.58486e+08	1.63786e+08	1.60652e+08	2.08966e+08	2.94383e+08	1.77188e+08	1.75401e+08	1.36122e+08	1.79155e+08	1.75835e+08	1.25979e+08	1.34335e+08	1.27217e+08	1.46189e+08	1.42469e+08	1.59451e+08	1.56367e+08	1.55986e+08	1.68694e+08	1.65375e+08	1.68365e+08	1.67751e+08	1.64465e+08	1.71883e+08
313	MAC_00694	6.59483	20034300	37761800	21629900	22423000	27145400	13391800	28734000	52430700	10933800	24853400	25059900	18725900	27315100	25142700	14931400	18742400	28214700	14092400	3	5	1.91459e+07	2.69092e+07	3.17617e+07	2.14287e+07	1.93439e+07	1.96648e+07	2.74599e+07	3.73623e+07	1.60554e+07	2.37513e+07	1.78578e+07	2.74974e+07	2.61039e+07	1.79168e+07	2.19255e+07	1.79113e+07	2.01059e+07	2.06935e+07	2.22407e+07	2.85145e+07	2.71108e+07	2.28088e+07	1.95317e+07	2.06089e+07	2.20439e+07	2.08735e+07	1.55747e+07
314	MAC_00695	6.52212	19875400	17205100	13308600	14313500	15977900	9471780	17299600	18326000	8407790	20463400	12741400	13306600	23669400	12206700	9162220	13315300	12510700	11677000	3	2	1.57206e+07	1.65522e+07	1.74896e+07	1.13214e+07	1.53716e+07	1.24474e+07	1.36833e+07	1.76306e+07	1.10492e+07	1.61857e+07	1.22579e+07	1.7487e+07	1.87215e+07	1.17435e+07	1.20406e+07	1.05318e+07	1.20359e+07	1.53454e+07	1.82617e+07	1.75397e+07	1.49286e+07	1.20505e+07	1.55208e+07	1.30451e+07	1.09845e+07	9.84979e+06	1.07183e+07
315	MAC_00697	6.60205	21042300	17362500	42778100	28085400	23057700	36010500	38835700	43066300	33617600	31012000	18968000	41778700	31704000	17836700	30068500	20852900	20593100	29984200	3	4	2.11085e+07	2.1868e+07	3.38579e+07	2.81738e+07	2.90411e+07	2.85015e+07	3.8958e+07	5.42418e+07	2.66075e+07	3.11096e+07	2.38901e+07	3.30669e+07	3.18038e+07	2.24653e+07	2.37985e+07	2.09185e+07	2.59369e+07	2.37318e+07	2.45206e+07	2.31726e+07	2.89e+07	2.99883e+07	2.9323e+07	2.98699e+07	3.12742e+07	3.03037e+07	2.58109e+07
316	MAC_00698	6.8374	18625600	20387800	37413900	17292100	20280200	27910700	22754600	43687700	26935400	20880400	19967800	37339700	20075800	19228300	28602000	14005700	19714700	26555200	3	4	2.33591e+07	2.10877e+07	2.88422e+07	2.16867e+07	2.09764e+07	2.15162e+07	2.85374e+07	4.51875e+07	2.07644e+07	2.61869e+07	2.06533e+07	2.8785e+07	2.51778e+07	1.98884e+07	2.20492e+07	1.75651e+07	2.03915e+07	2.04713e+07	2.71349e+07	2.23457e+07	2.46188e+07	2.30834e+07	2.118e+07	2.25493e+07	2.29089e+07	2.52452e+07	2.01427e+07
317	MAC_00701	7.32321	172628000	188340000	423373000	198066000	226347000	392156000	286170000	434901000	437231000	226454000	186744000	432938000	236240000	172795000	316975000	158492000	189092000	337749000	3	29	2.15739e+08	2.23519e+08	2.85452e+08	2.4753e+08	2.68626e+08	2.64404e+08	3.57637e+08	5.16135e+08	2.94795e+08	2.83008e+08	2.21625e+08	2.91901e+08	2.95237e+08	2.05071e+08	2.13715e+08	1.98073e+08	2.24412e+08	2.27721e+08	2.50612e+08	2.36854e+08	2.43653e+08	2.63472e+08	2.71233e+08	2.77099e+08	2.87099e+08	2.88353e+08	2.85968e+08
318	MAC_00702	6.67897	20185800	22227800	44764600	22464800	25851400	42413000	27752800	48035600	44436100	25672700	23375500	47347600	28455000	23486300	35243100	19602600	22592300	37967600	3	8	2.52531e+07	2.49872e+07	3.18305e+07	2.81042e+07	2.90607e+07	3.01584e+07	3.47197e+07	5.39989e+07	3.1597e+07	3.21174e+07	2.62774e+07	3.36672e+07	3.55981e+07	2.6402e+07	2.50601e+07	2.45235e+07	2.5397e+07	2.69974e+07	2.93351e+07	2.64779e+07	2.71696e+07	2.99142e+07	2.93428e+07	3.16064e+07	2.78718e+07	3.0168e+07	3.06509e+07
319	MAC_00703	8.08361	424007000	577586000	721704000	490656000	571091000	581817000	632852000	1004460000	639105000	538554000	444654000	654919000	554659000	408925000	494534000	413335000	478195000	598765000	3	21	4.66933e+08	5.78201e+08	6.5466e+08	5.40329e+08	5.71699e+08	5.27768e+08	6.96921e+08	1.00553e+09	5.79734e+08	5.93076e+08	4.45127e+08	5.94079e+08	6.10812e+08	4.0936e+08	4.48593e+08	4.5518e+08	4.78704e+08	5.43142e+08	5.42409e+08	6.12695e+08	5.58798e+08	5.75128e+08	5.77248e+08	5.53107e+08	5.59466e+08	5.61766e+08	5.62376e+08
320	MAC_00709	6.83881	7453820	18495700	12888500	8033860	18854100	12145300	12051700	34440000	13765900	8804260	15894000	13739900	9134750	15340700	9367060	7502910	17256500	11005600	3	3	1.08158e+07	1.21521e+07	1.35189e+07	1.16575e+07	1.23876e+07	1.27394e+07	1.74875e+07	2.26279e+07	1.44392e+07	1.27754e+07	1.04427e+07	1.4412e+07	1.32549e+07	1.00792e+07	9.82523e+06	1.0887e+07	1.13379e+07	1.15439e+07	1.25641e+07	1.28771e+07	1.15393e+07	1.24083e+07	1.25078e+07	1.3351e+07	1.40384e+07	1.26417e+07	1.40069e+07
321	MAC_00711	7.47288	105651000	97448200	116780000	111487000	140154000	95687100	137132000	197485000	110176000	135494000	129877000	107248000	144897000	112535000	88450300	90115900	116737000	78366800	3	6	1.01835e+08	8.67582e+07	1.36084e+08	1.0746e+08	1.24779e+08	1.11504e+08	1.32179e+08	1.75821e+08	1.28388e+08	1.306e+08	1.1563e+08	1.24976e+08	1.39664e+08	1.0019e+08	1.03071e+08	8.68612e+07	1.03931e+08	9.13211e+07	1.18296e+08	9.1934e+07	1.16157e+08	1.14381e+08	1.2599e+08	1.16858e+08	1.06109e+08	9.82272e+07	1.24544e+08
322	MAC_00721	8.94489	1129040000	2186880000	2624300000	1193040000	1784420000	2049490000	1623060000	3336190000	2149040000	1434500000	1445120000	2477780000	1353290000	1265870000	1724780000	969776000	1508120000	1932840000	3	39	1.51648e+09	2.04713e+09	2.08722e+09	1.60244e+09	1.67039e+09	1.63005e+09	2.18002e+09	3.12299e+09	1.70922e+09	1.92676e+09	1.35277e+09	1.97068e+09	1.81768e+09	1.18497e+09	1.37179e+09	1.30256e+09	1.41174e+09	1.53727e+09	1.7616e+09	2.16925e+09	1.78158e+09	1.70564e+09	1.6866e+09	1.70831e+09	1.75005e+09	1.74474e+09	1.65804e+09
323	MAC_00722	7.48617	147537000	262553000	230014000	146636000	247248000	166352000	163394000	318399000	147761000	182369000	203910000	233139000	196697000	183178000	161476000	129977000	203165000	187634000	3	14	1.75637e+08	2.14709e+08	2.36268e+08	1.74564e+08	2.02193e+08	1.70875e+08	1.94514e+08	2.60379e+08	1.51779e+08	2.17103e+08	1.66752e+08	2.39478e+08	2.3416e+08	1.49798e+08	1.65867e+08	1.54733e+08	1.66143e+08	1.92736e+08	2.04027e+08	2.27518e+08	2.01671e+08	1.85807e+08	2.04156e+08	1.79079e+08	1.5615e+08	1.45468e+08	1.47234e+08
324	MAC_00724	6.65807	34051900	20726400	27338900	36650100	26077500	23267400	49518200	48513000	28882000	42111000	21833200	27038800	46400100	20429900	21023100	30505800	21445400	21274600	3	6	2.50933e+07	2.39016e+07	3.21707e+07	2.7008e+07	3.00724e+07	2.73796e+07	3.64907e+07	5.59449e+07	3.39866e+07	3.10322e+07	2.51779e+07	3.18176e+07	3.41929e+07	2.35597e+07	2.47387e+07	2.24802e+07	2.47307e+07	2.50346e+07	2.91495e+07	2.53275e+07	2.746e+07	2.87474e+07	3.03643e+07	2.86942e+07	2.92936e+07	3.12552e+07	3.29689e+07
325	MAC_00725	7.59985	47393900	43806100	181627000	54525500	40977400	118278000	75037300	79026800	124745000	55725400	35203800	179935000	56055500	31392400	139297000	48430500	38056000	113119000	3	5	5.90701e+07	7.11972e+07	8.96617e+07	6.79587e+07	6.65998e+07	5.83889e+07	9.35238e+07	1.28441e+08	6.15814e+07	6.94542e+07	5.7216e+07	8.88264e+07	6.98656e+07	5.10215e+07	6.87651e+07	6.03621e+07	6.18517e+07	5.58422e+07	6.86183e+07	7.54446e+07	7.65325e+07	7.23354e+07	6.72462e+07	6.11923e+07	7.50779e+07	7.17569e+07	5.97376e+07
326	MAC_00726	6.68872	12917000	33527900	NA	13242800	31051200	NA	20292400	71234800	NA	15989800	27916100	NA	15432700	24203100	NA	12721500	28882100	NA	2	4	2.91765e+07	33527900	NA	2.99125e+07	31051200	NA	4.58359e+07	71234800	NA	3.61173e+07	27916100	NA	3.48589e+07	24203100	NA	2.8735e+07	28882100	NA	3.38927e+07	3.55281e+07	NA	3.18389e+07	3.13526e+07	NA	3.67956e+07	3.97972e+07	NA
327	MAC_00727	7.43931	71233200	164608000	174497000	75898100	153356000	136991000	88142400	247493000	139219000	86474100	143500000	177650000	92111100	138466000	128678000	65109700	143601000	145138000	3	11	1.11579e+08	1.26376e+08	1.45102e+08	1.18886e+08	1.17737e+08	1.13914e+08	1.38066e+08	1.9001e+08	1.15767e+08	1.35452e+08	1.1017e+08	1.47724e+08	1.44282e+08	1.06306e+08	1.07002e+08	1.01987e+08	1.10248e+08	1.20689e+08	1.29615e+08	1.33915e+08	1.23855e+08	1.26543e+08	1.1888e+08	1.19384e+08	1.10835e+08	1.06154e+08	1.12301e+08
328	MAC_00728	6.98245	39233800	75485600	33757400	38352600	62288700	21597000	51578400	109313000	20647600	44914700	58559700	27336600	47307400	54021300	21246300	34842500	55765200	24427100	3	6	3.8088e+07	4.62706e+07	5.67283e+07	3.72326e+07	3.81813e+07	3.62931e+07	5.00721e+07	6.70059e+07	3.46977e+07	4.3603e+07	3.58955e+07	4.59384e+07	4.59258e+07	3.31136e+07	3.57038e+07	3.3825e+07	3.41825e+07	4.1049e+07	4.42446e+07	4.9031e+07	4.84216e+07	3.96305e+07	3.85519e+07	3.80357e+07	4.01963e+07	3.74346e+07	3.36588e+07
329	MAC_00730	7.93326	168078000	236986000	335524000	170450000	229333000	259675000	206902000	320449000	238973000	186372000	203797000	358664000	218472000	177081000	251052000	165474000	196579000	281238000	3	10	2.06547e+08	2.41259e+08	2.68198e+08	2.09461e+08	2.33468e+08	2.07569e+08	2.54256e+08	3.26227e+08	1.91021e+08	2.29028e+08	2.07472e+08	2.86695e+08	2.68474e+08	1.80274e+08	2.00676e+08	2.03347e+08	2.00123e+08	2.24805e+08	2.39933e+08	2.55652e+08	2.28926e+08	2.22951e+08	2.35734e+08	2.17535e+08	2.04109e+08	1.82255e+08	1.85301e+08
330	MAC_00731	7.69109	142220000	165305000	237654000	151391000	184687000	200842000	174168000	270968000	210239000	169564000	138265000	230068000	187896000	129606000	171387000	139879000	142684000	204960000	3	15	1.5731e+08	1.75803e+08	2.02027e+08	1.67454e+08	1.96416e+08	1.70733e+08	1.92647e+08	2.88177e+08	1.78722e+08	1.87555e+08	1.47046e+08	1.95578e+08	2.07832e+08	1.37837e+08	1.45694e+08	1.5472e+08	1.51746e+08	1.74234e+08	1.82737e+08	1.86291e+08	1.72444e+08	1.78238e+08	1.98323e+08	1.78931e+08	1.54651e+08	1.60998e+08	1.7337e+08
331	MAC_00732	7.90448	235061000	301941000	344590000	234538000	278027000	285905000	352015000	574121000	314700000	293091000	252197000	381944000	298873000	209866000	260106000	199591000	230950000	258823000	3	13	2.54158e+08	2.97788e+08	3.23143e+08	2.53592e+08	2.74203e+08	2.6811e+08	3.80614e+08	5.66225e+08	2.95113e+08	3.16902e+08	2.48728e+08	3.58172e+08	3.23154e+08	2.06979e+08	2.43917e+08	2.15806e+08	2.27774e+08	2.42714e+08	2.9524e+08	3.15553e+08	2.75825e+08	2.69925e+08	2.76865e+08	2.80983e+08	3.05544e+08	3.16337e+08	2.86277e+08
332	MAC_00733	7.42503	107540000	125995000	59205000	122094000	116927000	39811100	142134000	171118000	38940800	136979000	99989800	57176100	138194000	89601800	42115200	103903000	109719000	40740500	3	5	7.53487e+07	9.42529e+07	1.12957e+08	8.5546e+07	8.74694e+07	7.59552e+07	9.95872e+07	1.28008e+08	7.42947e+07	9.59753e+07	7.47992e+07	1.09086e+08	9.68266e+07	6.70283e+07	8.03511e+07	7.28004e+07	8.20773e+07	7.77284e+07	8.75281e+07	9.98758e+07	9.64163e+07	9.10555e+07	8.83184e+07	7.9602e+07	7.99454e+07	7.15151e+07	7.20702e+07
333	MAC_00734	7.31993	100327000	197321000	122389000	105261000	175782000	77310600	111961000	245087000	78639100	120229000	182040000	139464000	147113000	168943000	98994600	98337500	188204000	85460800	3	8	1.14152e+08	1.3226e+08	1.6048e+08	1.19766e+08	1.17823e+08	1.01372e+08	1.27389e+08	1.64276e+08	1.03114e+08	1.36797e+08	1.22017e+08	1.82869e+08	1.67385e+08	1.13239e+08	1.29805e+08	1.11889e+08	1.26149e+08	1.12059e+08	1.32604e+08	1.4015e+08	1.36981e+08	1.2748e+08	1.18966e+08	1.06239e+08	1.02264e+08	9.17774e+07	1.00026e+08
334	MAC_00736	6.48738	11457200	28423600	16536200	15089300	36457500	12397700	20790000	74029100	14313600	16753000	33995400	16255500	19133400	30572600	13361400	12797000	31639100	11202600	3	6	1.46438e+07	1.54186e+07	2.38503e+07	1.92861e+07	1.97767e+07	1.78813e+07	2.65723e+07	4.01577e+07	2.06446e+07	2.14125e+07	1.84411e+07	2.34454e+07	2.4455e+07	1.65844e+07	1.92713e+07	1.63562e+07	1.71629e+07	1.61576e+07	1.70108e+07	1.63385e+07	2.03579e+07	2.05282e+07	1.99687e+07	1.87398e+07	2.13314e+07	2.24352e+07	2.00265e+07
335	MAC_00737	7.42506	61000400	104586000	139692000	70278000	115814000	102792000	88655100	206929000	104985000	81082300	109192000	136904000	83314500	92973900	97695800	63921500	100680000	105199000	3	10	8.19177e+07	8.8842e+07	1.22456e+08	9.43767e+07	9.83798e+07	9.01092e+07	1.19055e+08	1.75779e+08	9.20316e+07	1.08886e+08	9.27547e+07	1.20012e+08	1.11883e+08	7.8978e+07	8.56418e+07	8.58405e+07	8.5524e+07	9.22192e+07	9.51591e+07	9.41421e+07	1.04525e+08	1.00455e+08	9.93348e+07	9.44356e+07	9.55738e+07	9.82035e+07	8.9276e+07
336	MAC_00738	6.7664	21451500	30850200	28413300	22053600	33614700	18019700	26410300	54930000	21126200	24552000	32382600	20068000	27123200	29784000	15786600	19957200	31142000	16877600	3	4	2.30297e+07	2.2452e+07	3.63658e+07	2.36761e+07	2.4464e+07	2.30632e+07	2.83533e+07	3.99767e+07	2.70391e+07	2.63583e+07	2.35673e+07	2.56848e+07	2.91187e+07	2.16761e+07	2.02051e+07	2.14255e+07	2.26644e+07	2.16014e+07	2.67523e+07	2.37915e+07	3.10407e+07	2.52009e+07	2.47014e+07	2.41705e+07	2.27611e+07	2.23341e+07	2.62295e+07
337	MAC_00740	7.57051	167817000	212056000	269846000	190148000	253202000	228119000	274273000	509108000	259840000	224815000	221322000	280236000	227239000	195907000	199560000	161305000	207736000	202433000	3	17	1.89091e+08	1.94721e+08	2.60807e+08	2.14253e+08	2.32503e+08	2.20478e+08	3.09043e+08	4.67489e+08	2.51136e+08	2.53315e+08	2.03229e+08	2.70849e+08	2.56046e+08	1.79892e+08	1.92875e+08	1.81754e+08	1.90754e+08	1.95652e+08	2.19656e+08	2.06337e+08	2.22617e+08	2.28052e+08	2.3476e+08	2.31063e+08	2.4809e+08	2.61175e+08	2.43617e+08
338	MAC_00743	8.04641	251744000	367378000	434733000	249235000	325692000	301018000	291669000	582175000	344483000	264753000	333906000	357593000	323473000	315012000	259057000	248008000	329210000	259682000	3	12	2.94957e+08	3.17527e+08	4.29294e+08	2.92018e+08	2.81498e+08	2.97252e+08	3.41736e+08	5.03177e+08	3.40173e+08	3.10199e+08	2.88597e+08	3.53119e+08	3.78999e+08	2.72267e+08	2.55816e+08	2.9058e+08	2.84538e+08	2.56433e+08	3.42635e+08	3.3647e+08	3.66432e+08	3.10825e+08	2.8423e+08	3.11524e+08	2.74334e+08	2.81114e+08	3.29988e+08
339	MAC_00746	7.15978	62624500	91136600	135442000	72541600	101638000	120446000	101998000	208991000	135152000	88624300	87207000	140031000	85533000	79645200	103277000	59015400	85447200	109493000	3	12	8.05741e+07	8.81439e+07	1.08844e+08	9.33336e+07	9.83004e+07	9.67926e+07	1.31233e+08	2.02128e+08	1.08611e+08	1.14026e+08	8.43433e+07	1.12531e+08	1.10049e+08	7.70298e+07	8.29953e+07	7.59305e+07	8.26413e+07	8.79906e+07	9.35982e+07	9.34023e+07	9.29056e+07	9.93447e+07	9.92546e+07	1.0144e+08	1.0535e+08	1.12924e+08	1.05359e+08
340	MAC_00749	6.86526	53479000	70518200	7488860	57492800	71447100	6379140	81289100	134245000	5846100	64973200	62492400	6757950	70194300	58826300	5295780	49918900	68305300	5739160	3	4	2.63893e+07	2.89998e+07	3.69043e+07	2.837e+07	2.93818e+07	3.14357e+07	4.01123e+07	5.52068e+07	2.88089e+07	3.20612e+07	2.56993e+07	3.33024e+07	3.46375e+07	2.41917e+07	2.6097e+07	2.46326e+07	2.80898e+07	2.82819e+07	3.0655e+07	3.07299e+07	3.15003e+07	3.01971e+07	2.9667e+07	3.2945e+07	3.22009e+07	3.08427e+07	2.79463e+07
341	MAC_00751	6.74847	8013250	13395400	23738700	8095630	14178900	19270100	8392050	18782100	19562300	8312190	11244600	22171100	9914000	10683000	16070100	7483870	12430100	20504700	3	2	1.25224e+07	1.32057e+07	1.54088e+07	1.26512e+07	1.39782e+07	1.25083e+07	1.31144e+07	1.85162e+07	1.26979e+07	1.29896e+07	1.10854e+07	1.43913e+07	1.54928e+07	1.05317e+07	1.04311e+07	1.16952e+07	1.22541e+07	1.33096e+07	1.45466e+07	1.39936e+07	1.31525e+07	1.34659e+07	1.41138e+07	1.31088e+07	1.05278e+07	1.03446e+07	1.23177e+07
342	MAC_00752	6.88624	31975600	72217600	34460200	36785100	69629300	27881200	48885400	116574000	26505600	38381000	58315200	37199700	42153400	49294300	27699600	32543300	52917400	26762700	3	6	3.55781e+07	4.57248e+07	4.89152e+07	4.09295e+07	4.4086e+07	3.95765e+07	5.43931e+07	7.38092e+07	3.76239e+07	4.27052e+07	3.69225e+07	5.28039e+07	4.69026e+07	3.12109e+07	3.93188e+07	3.62098e+07	3.35048e+07	3.79889e+07	4.13291e+07	4.84527e+07	4.17525e+07	4.35655e+07	4.4514e+07	4.14767e+07	4.3665e+07	4.12355e+07	3.64974e+07
343	MAC_00753	6.9095	31669500	43439400	74001600	32551000	38547900	58614600	38841500	53569300	58242500	37155700	34315900	83342500	44927800	30638300	59573100	29262000	33458200	59205800	3	4	3.9804e+07	5.04138e+07	5.07329e+07	4.09119e+07	4.4737e+07	4.01841e+07	4.88182e+07	6.21702e+07	3.9929e+07	4.66994e+07	3.98255e+07	5.71367e+07	5.64678e+07	3.55575e+07	4.08412e+07	3.67781e+07	3.88301e+07	4.05894e+07	4.6238e+07	5.34214e+07	4.3304e+07	4.35468e+07	4.51712e+07	4.21134e+07	3.91896e+07	3.4733e+07	3.87335e+07
344	MAC_00755	6.97682	14560300	21017300	57775800	16520800	15852500	57998100	25383800	41389000	78079200	20804200	17759600	78101900	19609500	14898600	61927500	13626700	14526400	52237300	3	3	2.27337e+07	3.04664e+07	2.55272e+07	2.57947e+07	2.29796e+07	2.56254e+07	3.96329e+07	5.99969e+07	3.44979e+07	3.24826e+07	2.57441e+07	3.45079e+07	3.06172e+07	2.15968e+07	2.73615e+07	2.1276e+07	2.10573e+07	2.30801e+07	2.64084e+07	3.22839e+07	2.17892e+07	2.7456e+07	2.32026e+07	2.68557e+07	3.1816e+07	3.35189e+07	3.34649e+07
345	MAC_00756	6.88747	26877900	34529600	30174000	29442900	35109200	22105800	42690700	74901700	25458600	31259400	29759500	25405100	34849300	29000000	19950400	27778500	34277700	20940700	3	5	2.5753e+07	2.81644e+07	3.86093e+07	2.82107e+07	2.86371e+07	2.82856e+07	4.0904e+07	6.10942e+07	3.25757e+07	2.99511e+07	2.42736e+07	3.25072e+07	3.33908e+07	2.36541e+07	2.55276e+07	2.66159e+07	2.79589e+07	2.67948e+07	2.99158e+07	2.98446e+07	3.29557e+07	3.00275e+07	2.89151e+07	2.96436e+07	3.28364e+07	3.41319e+07	3.16003e+07
346	MAC_00757	6.74025	21331900	30782500	24448100	21790100	27963500	21031500	46643800	92792800	39000600	35120700	34600300	31667100	26684200	27673200	29124400	17995200	28022600	22211700	3	4	2.36868e+07	2.54554e+07	2.66252e+07	2.41956e+07	2.31243e+07	2.29043e+07	5.17929e+07	7.67345e+07	4.24735e+07	3.89978e+07	2.86125e+07	3.4487e+07	2.96299e+07	2.28842e+07	3.17179e+07	1.99817e+07	2.31731e+07	2.41896e+07	2.75156e+07	2.6974e+07	2.27264e+07	2.57538e+07	2.33487e+07	2.4004e+07	4.15777e+07	4.28698e+07	4.12018e+07
347	MAC_00758	8.21583	285179000	290973000	570357000	314847000	358961000	486117000	416278000	600038000	531468000	378376000	313733000	557931000	391251000	272231000	396111000	252798000	275507000	445966000	3	13	3.25728e+08	3.2943e+08	4.41061e+08	3.59614e+08	4.06404e+08	3.75918e+08	4.75467e+08	6.79344e+08	4.10988e+08	4.32176e+08	3.55199e+08	4.31452e+08	4.46882e+08	3.08211e+08	3.06315e+08	2.88742e+08	3.1192e+08	3.44869e+08	3.78379e+08	3.49083e+08	3.76476e+08	3.82774e+08	4.10349e+08	3.93966e+08	3.8169e+08	3.79534e+08	3.98682e+08
348	MAC_00759	6.65202	10110900	11915900	57455900	11402900	14841600	45530300	16495300	25298500	54416400	13410900	16702000	52342100	13430000	11464200	40854600	9952640	13828000	40775200	3	2	1.70878e+07	1.63632e+07	2.47569e+07	1.92714e+07	2.03808e+07	1.96183e+07	2.78777e+07	3.47405e+07	2.34472e+07	2.2665e+07	2.29356e+07	2.25534e+07	2.26973e+07	1.57429e+07	1.76036e+07	1.68204e+07	1.89889e+07	1.75694e+07	1.98499e+07	1.73394e+07	2.11317e+07	2.05125e+07	2.05787e+07	2.05602e+07	2.23793e+07	1.94087e+07	2.27452e+07
349	MAC_00761	7.02936	23733900	37219800	71112700	21740800	33558000	49842300	26755200	65019200	54041500	25141400	33280800	52631700	27415800	30719600	42312600	20630200	33662300	44671300	3	2	3.54683e+07	3.57281e+07	4.95724e+07	3.24898e+07	3.2213e+07	3.47449e+07	3.99834e+07	6.24133e+07	3.76722e+07	3.75717e+07	3.19469e+07	3.66894e+07	4.09706e+07	2.94884e+07	2.9496e+07	3.08301e+07	3.23131e+07	3.11402e+07	4.12015e+07	3.78595e+07	4.23135e+07	3.45823e+07	3.25257e+07	3.64131e+07	3.20974e+07	3.48689e+07	3.65442e+07
350	MAC_00762	6.95947	45837500	36379100	124905000	53499400	45180800	102192000	66918400	82717500	104386000	55960300	35915000	107823000	61311700	35010000	83719200	44776900	40717200	98852600	3	7	5.28621e+07	5.19916e+07	7.57836e+07	6.16982e+07	6.45706e+07	6.20029e+07	7.71737e+07	1.18217e+08	6.33341e+07	6.45363e+07	5.13283e+07	6.54194e+07	7.07078e+07	5.00349e+07	5.07949e+07	5.1639e+07	5.81914e+07	5.99768e+07	6.14069e+07	5.50933e+07	6.46865e+07	6.56718e+07	6.51974e+07	6.49798e+07	6.19525e+07	6.60449e+07	6.14377e+07
351	MAC_00763	7.47725	124299000	199173000	183731000	143612000	210242000	150596000	194412000	373148000	165571000	163387000	192345000	183440000	171632000	170181000	134253000	121259000	190728000	145494000	3	18	1.42362e+08	1.60424e+08	1.99168e+08	1.64481e+08	1.69339e+08	1.63249e+08	2.22663e+08	3.00551e+08	1.79482e+08	1.8713e+08	1.54924e+08	1.98852e+08	1.96573e+08	1.37072e+08	1.45533e+08	1.3888e+08	1.53622e+08	1.57718e+08	1.65373e+08	1.69994e+08	1.70004e+08	1.75074e+08	1.70983e+08	1.71087e+08	1.78747e+08	1.67911e+08	1.74108e+08
352	MAC_00768	6.77908	33820900	17161000	33587100	37831300	22655800	22142500	45123200	33281900	23619500	37076300	20822100	27507500	46294300	20472500	20568700	40567500	22526600	21510600	3	4	2.36869e+07	2.14545e+07	3.83595e+07	2.64957e+07	2.83241e+07	2.52887e+07	3.16026e+07	4.16087e+07	2.69756e+07	2.59669e+07	2.60316e+07	3.1416e+07	3.24228e+07	2.55945e+07	2.34913e+07	2.8412e+07	2.81626e+07	2.4567e+07	2.75157e+07	2.27345e+07	3.27425e+07	2.82021e+07	2.8599e+07	2.65029e+07	2.53696e+07	2.32458e+07	2.61679e+07
353	MAC_00772	7.58501	154926000	164849000	255276000	195123000	180032000	244217000	254826000	363407000	250012000	216113000	154329000	271718000	218662000	130103000	211435000	160002000	130934000	221202000	3	17	1.59326e+08	1.91142e+08	2.14081e+08	2.00665e+08	2.08747e+08	2.04806e+08	2.62064e+08	4.21369e+08	2.09666e+08	2.22251e+08	1.78944e+08	2.27869e+08	2.24873e+08	1.50854e+08	1.77314e+08	1.64546e+08	1.51818e+08	1.85505e+08	1.8508e+08	2.02545e+08	1.82733e+08	2.13589e+08	2.10773e+08	2.14639e+08	2.10376e+08	2.35409e+08	2.03388e+08
354	MAC_00773	7.48348	183618000	175074000	253625000	206063000	205189000	221553000	273438000	356405000	248226000	233175000	173282000	249672000	244614000	164724000	181759000	171252000	184937000	199515000	3	15	1.81797e+08	1.85358e+08	2.41953e+08	2.04019e+08	2.17242e+08	2.11357e+08	2.70726e+08	3.77341e+08	2.36803e+08	2.30862e+08	1.83461e+08	2.38182e+08	2.42187e+08	1.744e+08	1.73395e+08	1.69553e+08	1.95801e+08	1.90333e+08	2.11182e+08	1.96416e+08	2.06524e+08	2.17158e+08	2.19351e+08	2.21505e+08	2.1733e+08	2.10812e+08	2.29712e+08
355	MAC_00774	6.4141	NA	11021000	16823100	NA	13347300	14024400	NA	28729300	15483000	NA	10955700	17379200	NA	10599500	10702200	NA	9614370	11896900	2	3	NA	11021000	1.53794e+07	NA	13347300	1.28209e+07	NA	28729300	1.41543e+07	NA	10955700	1.58878e+07	NA	10599500	9.78379e+06	NA	9614370	1.0876e+07	NA	1.16785e+07	1.31274e+07	NA	1.34769e+07	1.34365e+07	NA	1.60504e+07	1.37305e+07
356	MAC_00776	7.65248	234247000	508104000	292310000	268060000	365745000	234824000	341627000	726297000	262373000	281844000	349710000	286069000	344233000	301323000	215019000	207771000	302525000	272226000	3	22	2.60864e+08	3.85821e+08	3.45677e+08	2.98519e+08	2.77723e+08	2.77696e+08	3.80445e+08	5.51502e+08	3.10275e+08	3.13869e+08	2.65547e+08	3.38297e+08	3.83347e+08	2.28805e+08	2.54275e+08	2.3138e+08	2.29718e+08	3.21926e+08	3.0303e+08	4.08838e+08	2.95059e+08	3.17745e+08	2.80418e+08	2.91029e+08	3.05409e+08	3.08112e+08	3.00984e+08
357	MAC_00779	6.7082	14433900	6583600	8429550	24935000	13349000	8734280	30194700	23121700	9454740	20414600	9195040	9119950	27555200	10155200	8252720	14102400	6923590	6589660	3	3	8.41871e+06	7.71202e+06	1.23378e+07	1.45436e+07	1.5637e+07	1.27838e+07	1.76114e+07	2.70847e+07	1.38383e+07	1.1907e+07	1.07711e+07	1.33483e+07	1.60718e+07	1.18958e+07	1.2079e+07	8.22536e+06	8.11028e+06	9.64487e+06	9.77953e+06	8.1721e+06	1.05312e+07	1.54802e+07	1.57888e+07	1.33976e+07	1.41378e+07	1.51316e+07	1.3424e+07
358	MAC_00785	7.65269	86818700	157308000	147927000	99673700	190326000	121215000	123365000	285726000	135198000	112135000	162184000	145707000	121260000	140269000	109168000	82512400	167339000	111346000	3	9	1.11971e+08	1.16997e+08	1.54216e+08	1.2855e+08	1.41554e+08	1.26368e+08	1.59105e+08	2.12508e+08	1.40946e+08	1.44622e+08	1.20624e+08	1.51902e+08	1.5639e+08	1.04325e+08	1.13809e+08	1.06417e+08	1.24458e+08	1.1608e+08	1.3007e+08	1.23977e+08	1.31634e+08	1.36829e+08	1.42928e+08	1.32436e+08	1.27725e+08	1.18723e+08	1.36726e+08
359	MAC_00786	6.8513	18776400	27724400	NA	17864100	27593300	NA	19343300	39180800	NA	20769400	26363700	NA	25462000	22749800	NA	21481400	28352200	NA	2	2	2.59167e+07	27724400	NA	2.46575e+07	27593300	NA	2.66992e+07	39180800	NA	2.86676e+07	26363700	NA	3.51447e+07	22749800	NA	2.96504e+07	28352200	NA	3.01059e+07	2.93784e+07	NA	2.62455e+07	2.78611e+07	NA	2.14333e+07	2.18894e+07	NA
360	MAC_00787	6.93728	53950400	116488000	52345400	62989000	155276000	40599700	70778600	220041000	34562500	65428400	107284000	44211700	76027800	112324000	34616900	70798900	130698000	38386800	3	9	5.80782e+07	6.12011e+07	9.25512e+07	6.78083e+07	8.15798e+07	7.17838e+07	7.61939e+07	1.15606e+08	6.11095e+07	7.04343e+07	5.63655e+07	7.81701e+07	8.18447e+07	5.90134e+07	6.12057e+07	7.62157e+07	6.86669e+07	6.78712e+07	6.7466e+07	6.48522e+07	7.89989e+07	7.21754e+07	8.23717e+07	7.52303e+07	6.1166e+07	6.45866e+07	5.92798e+07
361	MAC_00788	6.95621	30452100	107991000	99098300	35568800	116604000	90689400	48527800	213173000	92768600	42010800	98956200	111354000	41473900	83342900	76505800	26855900	93930600	88648200	3	10	6.02594e+07	6.94937e+07	7.78217e+07	7.03845e+07	7.50363e+07	7.12182e+07	9.60281e+07	1.3718e+08	7.2851e+07	8.31321e+07	6.36797e+07	8.7446e+07	8.20697e+07	5.36323e+07	6.00798e+07	5.31432e+07	6.04456e+07	6.96152e+07	6.99999e+07	7.36395e+07	6.64262e+07	7.49175e+07	7.57646e+07	7.46375e+07	7.70883e+07	7.66392e+07	7.06697e+07
362	MAC_00789	6.99038	51236000	96138400	110629000	62330400	102219000	86046200	80019200	189331000	93694900	66365200	91612400	95846300	70407200	85082100	77927400	52632700	93828700	79292000	3	15	6.8412e+07	7.68902e+07	1.03595e+08	8.32256e+07	8.17534e+07	8.0575e+07	1.06844e+08	1.51424e+08	8.77374e+07	8.8613e+07	7.32704e+07	8.9752e+07	9.401e+07	6.80475e+07	7.29725e+07	7.02769e+07	7.5043e+07	7.42503e+07	7.94702e+07	8.14773e+07	8.84253e+07	8.85856e+07	8.2547e+07	8.44436e+07	8.57711e+07	8.45974e+07	8.51104e+07
363	MAC_00790	8.81273	1008230000	1063720000	1946350000	1089090000	1143750000	1608480000	1460310000	2177810000	1866100000	1270320000	1020670000	1936140000	1328290000	885683000	1358330000	957481000	982420000	1482550000	3	64	1.13159e+09	1.21316e+09	1.52054e+09	1.22235e+09	1.30444e+09	1.25659e+09	1.63899e+09	2.48377e+09	1.45785e+09	1.42575e+09	1.16406e+09	1.51257e+09	1.49081e+09	1.01011e+09	1.06117e+09	1.07463e+09	1.12044e+09	1.15821e+09	1.31451e+09	1.28554e+09	1.29789e+09	1.30107e+09	1.3171e+09	1.31692e+09	1.31573e+09	1.38763e+09	1.4142e+09
364	MAC_00791	7.38812	NA	43504600	76170300	NA	43759800	63732800	NA	56926200	57629300	NA	33530100	75080800	NA	32128200	55313200	NA	35515500	68524800	2	6	NA	43504600	4.65475e+07	NA	43759800	3.8947e+07	NA	56926200	3.52171e+07	NA	33530100	4.58817e+07	NA	32128200	3.38018e+07	NA	35515500	4.18754e+07	NA	4.61e+07	3.97315e+07	NA	4.41846e+07	4.08169e+07	NA	3.18034e+07	3.41627e+07
365	MAC_00794	8.92066	325027000	445899000	1001020000	337458000	572682000	904521000	498266000	987312000	1009480000	421916000	421101000	1016370000	432423000	376216000	693150000	290977000	427695000	870482000	3	8	4.80503e+08	4.90552e+08	6.15486e+08	4.9888e+08	6.30031e+08	5.56153e+08	7.3661e+08	1.08618e+09	6.20688e+08	6.23738e+08	4.6327e+08	6.24924e+08	6.39271e+08	4.13891e+08	4.2619e+08	4.30165e+08	4.70525e+08	5.35224e+08	5.58172e+08	5.19817e+08	5.2536e+08	5.3101e+08	6.36146e+08	5.82855e+08	5.91327e+08	6.06825e+08	6.02103e+08
366	MAC_00795	7.55501	27521600	35946900	103021000	23478800	30652200	77237600	27379600	46881000	83261800	27996200	27938500	87194800	34271500	26162200	64608900	25826500	28920700	73437200	3	4	4.14025e+07	4.64472e+07	5.29999e+07	3.53207e+07	3.96059e+07	3.97354e+07	4.11889e+07	6.05752e+07	4.28346e+07	4.21165e+07	3.60995e+07	4.4858e+07	5.15568e+07	3.38043e+07	3.32385e+07	3.88525e+07	3.73686e+07	3.77803e+07	4.80949e+07	4.92181e+07	4.52391e+07	3.75955e+07	3.99903e+07	4.16432e+07	3.30651e+07	3.3842e+07	4.15521e+07
367	MAC_00798	8.60421	719137000	991422000	1820670000	749912000	1149000000	1610970000	953597000	1900490000	1854010000	893434000	981654000	1926390000	928673000	891380000	1343800000	633052000	942980000	1437970000	3	16	1.01517e+09	1.02153e+09	1.25173e+09	1.05862e+09	1.18389e+09	1.10755e+09	1.34615e+09	1.95821e+09	1.27465e+09	1.26122e+09	1.01147e+09	1.32441e+09	1.31097e+09	9.18451e+08	9.23873e+08	8.93652e+08	9.71618e+08	9.88616e+08	1.17927e+09	1.08247e+09	1.06843e+09	1.1268e+09	1.19539e+09	1.16073e+09	1.08065e+09	1.09401e+09	1.23648e+09
368	MAC_00799	6.85423	39603300	44483400	21318600	33625300	39356600	21873900	34996600	59593400	21073200	40729500	35531400	24434700	43766600	28981200	18549500	32793500	29648800	21375200	3	4	3.31574e+07	3.62855e+07	3.12158e+07	2.81524e+07	3.21035e+07	3.20289e+07	2.93005e+07	4.86108e+07	3.08565e+07	3.41003e+07	2.89833e+07	3.57785e+07	3.66431e+07	2.36402e+07	2.71611e+07	2.7456e+07	2.41848e+07	3.12987e+07	3.8517e+07	3.84502e+07	2.66448e+07	2.99655e+07	3.24151e+07	3.35667e+07	2.35215e+07	2.71578e+07	2.99326e+07
369	MAC_00800	7.46146	70487600	98132200	133834000	89494500	124190000	104206000	139935000	278020000	139821000	98809600	101247000	128674000	110949000	95514600	92592900	68810600	104087000	90329500	3	5	8.22659e+07	8.72336e+07	1.28999e+08	1.04449e+08	1.10397e+08	1.00442e+08	1.63318e+08	2.47143e+08	1.3477e+08	1.1532e+08	9.00024e+07	1.24026e+08	1.29488e+08	8.49067e+07	8.9248e+07	8.03087e+07	9.2527e+07	8.70664e+07	9.55635e+07	9.24377e+07	1.1011e+08	1.11176e+08	1.11469e+08	1.05264e+08	1.31106e+08	1.38073e+08	1.30735e+08
370	MAC_00802	7.84797	281190000	398817000	648990000	300590000	408030000	570164000	434105000	783095000	544093000	354543000	338506000	676167000	353038000	308529000	481331000	245550000	350060000	507003000	3	24	3.67156e+08	4.11096e+08	4.8219e+08	3.92487e+08	4.20592e+08	4.23624e+08	5.6682e+08	8.07205e+08	4.04253e+08	4.62934e+08	3.48928e+08	5.02382e+08	4.60969e+08	3.18028e+08	3.57622e+08	3.2062e+08	3.60838e+08	3.76696e+08	4.26503e+08	4.35621e+08	4.11583e+08	4.17764e+08	4.24675e+08	4.43963e+08	4.55025e+08	4.50967e+08	3.92149e+08
371	MAC_00803	6.68168	6542540	13535000	44609500	8759910	15636700	34844300	11041600	30082300	35444200	9475560	14533700	39882100	9472950	14181300	29907600	6455920	16124700	33318400	3	9	1.32852e+07	1.39814e+07	2.12673e+07	1.77878e+07	1.61524e+07	1.66118e+07	2.24209e+07	3.10745e+07	1.68978e+07	1.9241e+07	1.50131e+07	1.90135e+07	1.92357e+07	1.4649e+07	1.42583e+07	1.31093e+07	1.66565e+07	1.58843e+07	1.54326e+07	1.48155e+07	1.81531e+07	1.89334e+07	1.63092e+07	1.74094e+07	1.79988e+07	1.73606e+07	1.63918e+07
372	MAC_00804	6.89277	9325670	46254800	32764800	10765600	50158200	23179200	14107900	95515700	25402100	13593100	42502200	34863300	12936300	36901600	23363300	8448750	44994400	35420500	3	4	2.08603e+07	2.34215e+07	2.89274e+07	2.40812e+07	2.53981e+07	2.04644e+07	3.15575e+07	4.83653e+07	2.2427e+07	3.04059e+07	2.15214e+07	3.07801e+07	2.89368e+07	1.86855e+07	2.0627e+07	1.88987e+07	2.27833e+07	3.1272e+07	2.42322e+07	2.48188e+07	2.46915e+07	2.56321e+07	2.56446e+07	2.1447e+07	2.53333e+07	2.70206e+07	2.17555e+07
373	MAC_00807	8.08131	179460000	312283000	420383000	207008000	355812000	390110000	258313000	605961000	434142000	231877000	285580000	440244000	253334000	259505000	311346000	158823000	270790000	339257000	3	13	2.55013e+08	2.82283e+08	3.27275e+08	2.94159e+08	3.2163e+08	3.03707e+08	3.67064e+08	5.47748e+08	3.37987e+08	3.29498e+08	2.58145e+08	3.42737e+08	3.59989e+08	2.34575e+08	2.42388e+08	2.25688e+08	2.44776e+08	2.64117e+08	2.96234e+08	2.99123e+08	2.79352e+08	3.13104e+08	3.24752e+08	3.18289e+08	2.94667e+08	3.06014e+08	3.27867e+08
374	MAC_00810	7.10236	35079800	71949600	73894300	41615600	74911800	66664100	64022600	163045000	71309500	47533400	66056000	73827200	49137100	61833200	53854900	35145500	62467600	59195800	3	13	4.82888e+07	5.64321e+07	6.84422e+07	5.72856e+07	5.87554e+07	6.17455e+07	8.81298e+07	1.27881e+08	6.60481e+07	6.54317e+07	5.18096e+07	6.838e+07	6.76393e+07	4.84975e+07	4.98814e+07	4.83792e+07	4.89951e+07	5.48282e+07	5.60943e+07	5.97987e+07	5.84202e+07	6.0975e+07	5.93257e+07	6.471e+07	7.07477e+07	7.1444e+07	6.40705e+07
375	MAC_00812	7.13805	77021900	112616000	36828100	76129300	112420000	31540700	115054000	218970000	39748800	84783100	100344000	36679400	91883300	86136700	25988400	71787200	91858800	31753300	3	4	6.22438e+07	6.78298e+07	7.56619e+07	6.15225e+07	6.77118e+07	6.47991e+07	9.29787e+07	1.31888e+08	8.16623e+07	6.85159e+07	6.04383e+07	7.53564e+07	7.42538e+07	5.1881e+07	5.33921e+07	5.80135e+07	5.53275e+07	6.52359e+07	7.2305e+07	7.18764e+07	6.45826e+07	6.54847e+07	6.8369e+07	6.79103e+07	7.46403e+07	7.36828e+07	7.92172e+07
376	MAC_00813	7.15797	44004000	92486800	111015000	49248400	86787600	95162100	77510600	200562000	115317000	58357400	81074900	107426000	58821500	75235300	74816200	39594900	83008600	80411800	3	11	6.53399e+07	7.56802e+07	9.13678e+07	7.31271e+07	7.10167e+07	7.83205e+07	1.15093e+08	1.64116e+08	9.49084e+07	8.66527e+07	6.63421e+07	8.8414e+07	8.73418e+07	6.15636e+07	6.15754e+07	5.87929e+07	6.79244e+07	6.61807e+07	7.59015e+07	8.01951e+07	7.79887e+07	7.78367e+07	7.1706e+07	8.20809e+07	9.23926e+07	9.16879e+07	9.20667e+07
377	MAC_00815	7.18568	90364600	127671000	171411000	103893000	150345000	140582000	143978000	272321000	156964000	120915000	133975000	169816000	124676000	113059000	125289000	86954600	124530000	126876000	3	17	1.09564e+08	1.16285e+08	1.55217e+08	1.25966e+08	1.36937e+08	1.27301e+08	1.74568e+08	2.48034e+08	1.42135e+08	1.46605e+08	1.22026e+08	1.53773e+08	1.51165e+08	1.02976e+08	1.13453e+08	1.05429e+08	1.13424e+08	1.1489e+08	1.27274e+08	1.23222e+08	1.32489e+08	1.34079e+08	1.38266e+08	1.33413e+08	1.40138e+08	1.38571e+08	1.37879e+08
378	MAC_00818	6.81483	18084500	39666200	48305300	20172600	49037700	39351900	28252200	81255800	42041600	22453100	39594400	46622200	23615000	39263400	34924700	17336300	39551200	35447600	3	6	2.90253e+07	2.9425e+07	4.05723e+07	3.23766e+07	3.63769e+07	3.30522e+07	4.53442e+07	6.02768e+07	3.53113e+07	3.60368e+07	2.93717e+07	3.91586e+07	3.79016e+07	2.91262e+07	2.93337e+07	2.78244e+07	2.93397e+07	2.97729e+07	3.3717e+07	3.11804e+07	3.46313e+07	3.44618e+07	3.673e+07	3.46391e+07	3.64009e+07	3.36752e+07	3.4254e+07
379	MAC_00819	7.02419	34067700	58441100	65708500	41385700	71622700	58231500	59627300	153676000	63498300	46456500	54375100	65433900	52010400	53052500	48417600	32397500	54098300	52289900	3	5	4.38308e+07	4.77447e+07	6.25141e+07	5.3246e+07	5.85137e+07	5.54006e+07	7.67152e+07	1.25549e+08	6.04114e+07	5.977e+07	4.44229e+07	6.22529e+07	6.69155e+07	4.33424e+07	4.60638e+07	4.16819e+07	4.41968e+07	4.97479e+07	5.09157e+07	5.0593e+07	5.33601e+07	5.66752e+07	5.90817e+07	5.80605e+07	6.15845e+07	7.01413e+07	5.86025e+07
380	MAC_00820	6.52095	9190030	8812020	19560000	12337200	11316900	17697000	14720100	17513800	19645000	13243000	9737260	22517000	13868900	9630220	16436500	9083470	8634490	16358500	3	3	1.02793e+07	1.10347e+07	1.39649e+07	1.37995e+07	1.41714e+07	1.26348e+07	1.64648e+07	2.19313e+07	1.40256e+07	1.48126e+07	1.21933e+07	1.60761e+07	1.55127e+07	1.20593e+07	1.17349e+07	1.01601e+07	1.08124e+07	1.16792e+07	1.19408e+07	1.1693e+07	1.192e+07	1.46882e+07	1.43089e+07	1.32414e+07	1.32174e+07	1.22525e+07	1.36056e+07
381	MAC_00823	7.38119	126625000	157959000	77455200	132291000	160189000	69355300	174550000	284024000	68490000	155282000	141326000	87472600	157180000	119153000	64075000	114721000	136607000	68645200	3	10	1.05093e+08	1.16609e+08	1.26417e+08	1.09796e+08	1.18255e+08	1.13197e+08	1.44869e+08	2.09674e+08	1.11785e+08	1.28877e+08	1.0433e+08	1.42767e+08	1.30453e+08	8.79617e+07	1.04579e+08	9.52135e+07	1.00847e+08	1.12038e+08	1.22081e+08	1.23566e+08	1.07906e+08	1.16867e+08	1.19403e+08	1.18632e+08	1.16296e+08	1.1714e+08	1.08438e+08
382	MAC_00826	6.48897	11029500	18855000	15061700	12428800	23106400	12891700	15456400	38140800	15585700	14211200	19496100	15962500	15306300	18096000	11074800	10964200	18691200	12908700	3	3	1.33144e+07	1.36302e+07	1.72596e+07	1.50036e+07	1.67035e+07	1.4773e+07	1.86584e+07	2.75718e+07	1.78601e+07	1.71553e+07	1.40937e+07	1.82919e+07	1.84772e+07	1.30815e+07	1.26909e+07	1.32356e+07	1.35118e+07	1.47924e+07	1.54666e+07	1.44434e+07	1.47323e+07	1.59699e+07	1.68657e+07	1.54822e+07	1.49784e+07	1.54038e+07	1.73253e+07
383	MAC_00827	6.61952	30270900	28370100	19581900	35158200	30391500	18478800	50208700	58948600	19743600	37311100	27377500	22694000	42728000	25459800	16172900	26673400	24380300	16547800	3	6	2.30241e+07	2.53532e+07	2.88087e+07	2.67414e+07	2.71597e+07	2.71859e+07	3.81889e+07	5.268e+07	2.90466e+07	2.83789e+07	2.44662e+07	3.33872e+07	3.24991e+07	2.27524e+07	2.37934e+07	2.02879e+07	2.17877e+07	2.4345e+07	2.67458e+07	2.68657e+07	2.45902e+07	2.84637e+07	2.74233e+07	2.84911e+07	3.06568e+07	2.94311e+07	2.81769e+07
384	MAC_00829	7.44171	41675400	67034400	127233000	51456800	86631700	132875000	78740200	177330000	154707000	60153500	73185500	142814000	57352500	69596200	107024000	39568200	71303900	111789000	3	15	6.51925e+07	6.59046e+07	8.27301e+07	8.04935e+07	8.51716e+07	8.63987e+07	1.23173e+08	1.74341e+08	1.00594e+08	9.40977e+07	7.1952e+07	9.28613e+07	8.97161e+07	6.84232e+07	6.95897e+07	6.18963e+07	7.01021e+07	7.26881e+07	7.57304e+07	6.98363e+07	7.06159e+07	8.56776e+07	8.59983e+07	9.05469e+07	9.88791e+07	9.74004e+07	9.75824e+07
385	MAC_00831	6.12449	10876500	NA	31038100	10617900	NA	24550800	15726200	NA	28152700	12987200	NA	30458800	13513600	NA	22997400	10877400	NA	28458100	2	3	1.62461e+07	NA	2.07795e+07	1.58598e+07	NA	1.64364e+07	2.349e+07	NA	1.88478e+07	1.93988e+07	NA	2.03917e+07	2.01851e+07	NA	1.53964e+07	1.62474e+07	NA	1.90523e+07	1.88721e+07	NA	1.77368e+07	1.68812e+07	NA	1.72255e+07	1.8857e+07	NA	1.82835e+07
386	MAC_00832	7.68584	100724000	138705000	299870000	105086000	142679000	241477000	141831000	241359000	252180000	123209000	112500000	299297000	123679000	103084000	220448000	86221300	115106000	240548000	3	12	1.41853e+08	1.60646e+08	1.83844e+08	1.47996e+08	1.65249e+08	1.48045e+08	1.99745e+08	2.79539e+08	1.54606e+08	1.73519e+08	1.30296e+08	1.83493e+08	1.74181e+08	1.19391e+08	1.35152e+08	1.21428e+08	1.33314e+08	1.47475e+08	1.64782e+08	1.7023e+08	1.56924e+08	1.57527e+08	1.66853e+08	1.55153e+08	1.60349e+08	1.56172e+08	1.49977e+08
387	MAC_00833	8.04244	201313000	384591000	364339000	222406000	422065000	322424000	284480000	784618000	349046000	262206000	350604000	385337000	260710000	314944000	277249000	179713000	336127000	295189000	3	11	2.73562e+08	2.96137e+08	3.48199e+08	3.02225e+08	3.24993e+08	3.08141e+08	3.86577e+08	6.04161e+08	3.33583e+08	3.56309e+08	2.69967e+08	3.68267e+08	3.54276e+08	2.42509e+08	2.64967e+08	2.4421e+08	2.5882e+08	2.82112e+08	3.17781e+08	3.13804e+08	2.97212e+08	3.2169e+08	3.28147e+08	3.22935e+08	3.10332e+08	3.37531e+08	3.23595e+08
388	MAC_00844	6.47829	6401090	13136600	22822800	7973880	13462000	18944500	9748040	23408400	19588900	7658290	11688500	21700800	9171960	11820900	16092300	6893840	14120900	16764900	3	3	1.04597e+07	1.19544e+07	1.53482e+07	1.30298e+07	1.22505e+07	1.27401e+07	1.59288e+07	2.13017e+07	1.31735e+07	1.25141e+07	1.06366e+07	1.45937e+07	1.49875e+07	1.07571e+07	1.0822e+07	1.12649e+07	1.28501e+07	1.12743e+07	1.21505e+07	1.26675e+07	1.31008e+07	1.38689e+07	1.23694e+07	1.33518e+07	1.27872e+07	1.19008e+07	1.2779e+07
389	MAC_00846	7.74685	91303800	144596000	157038000	106428000	159286000	126395000	146243000	304950000	138874000	113190000	137710000	156872000	117397000	118053000	115321000	85185000	148059000	123261000	3	7	1.12095e+08	1.19947e+08	1.54196e+08	1.30664e+08	1.32133e+08	1.24107e+08	1.79545e+08	2.52966e+08	1.36361e+08	1.38965e+08	1.14235e+08	1.54033e+08	1.4413e+08	9.79288e+07	1.13234e+08	1.04583e+08	1.2282e+08	1.2103e+08	1.30215e+08	1.27103e+08	1.31617e+08	1.39079e+08	1.33416e+08	1.30066e+08	1.44133e+08	1.41326e+08	1.32278e+08
390	MAC_00847	7.21289	19818200	20086000	64550200	21095900	21677900	52925200	24968300	37894500	50700400	22820400	22388800	62712500	25760700	23931700	43933600	20171500	24082900	47271600	3	4	2.72735e+07	2.52531e+07	3.73077e+07	2.90319e+07	2.72546e+07	3.05889e+07	3.4361e+07	4.76429e+07	2.9303e+07	3.14051e+07	2.81483e+07	3.62456e+07	3.54515e+07	3.00881e+07	2.53921e+07	2.77597e+07	3.02782e+07	2.73213e+07	3.1682e+07	2.67597e+07	3.18447e+07	3.09016e+07	2.75191e+07	3.20575e+07	2.75839e+07	2.6617e+07	2.84257e+07
391	MAC_00848	6.62667	NA	17727500	29157100	NA	24509000	17219900	NA	36643500	13900200	NA	15589000	22946900	NA	15210300	14958900	NA	20255500	14254000	2	2	NA	17727500	3.335e+07	NA	24509000	1.96962e+07	NA	36643500	1.58991e+07	NA	15589000	2.62468e+07	NA	15210300	1.71101e+07	NA	20255500	1.63038e+07	NA	1.87851e+07	2.84666e+07	NA	2.47469e+07	2.06419e+07	NA	2.04719e+07	1.54231e+07
392	MAC_00851	6.43537	10637500	30880900	17026200	12919700	31312500	16400300	20798600	69809200	18909500	14754500	30730200	18378900	13877500	26191400	13640000	9103520	28530100	13306100	3	6	1.55799e+07	1.75705e+07	2.04314e+07	1.89224e+07	1.78161e+07	1.96803e+07	3.0462e+07	3.97199e+07	2.26914e+07	2.16097e+07	1.74848e+07	2.20546e+07	2.03252e+07	1.49023e+07	1.6368e+07	1.33332e+07	1.6233e+07	1.59673e+07	1.80982e+07	1.86187e+07	1.74396e+07	2.01411e+07	1.7989e+07	2.06252e+07	2.44539e+07	2.21906e+07	2.20119e+07
393	MAC_00855	7.23467	41691800	68677100	117476000	41540800	74443600	113034000	51354000	121625000	118351000	50486900	59150100	128792000	53871600	52552300	91970200	38268200	56960900	101478000	3	5	6.42851e+07	7.00895e+07	7.46532e+07	6.40522e+07	7.59746e+07	7.18304e+07	7.91833e+07	1.24126e+08	7.52092e+07	7.78463e+07	6.03666e+07	8.18442e+07	8.30653e+07	5.36331e+07	5.84449e+07	5.90062e+07	5.81324e+07	6.44868e+07	7.46762e+07	7.42709e+07	6.37217e+07	6.81775e+07	7.67121e+07	7.52792e+07	6.35658e+07	6.93466e+07	7.29573e+07
394	MAC_00856	7.45028	89900400	241414000	264180000	104058000	252780000	223842000	135647000	461875000	245732000	111927000	231092000	247077000	118619000	205376000	187609000	90910600	220543000	192485000	3	23	1.54092e+08	1.72186e+08	2.16096e+08	1.78359e+08	1.80292e+08	1.831e+08	2.32503e+08	3.29427e+08	2.01006e+08	1.91846e+08	1.64824e+08	2.02106e+08	2.03317e+08	1.46482e+08	1.53462e+08	1.55824e+08	1.573e+08	1.5745e+08	1.79e+08	1.82458e+08	1.84453e+08	1.89846e+08	1.82042e+08	1.91891e+08	1.86646e+08	1.84043e+08	1.94987e+08
395	MAC_00857	6.62948	7423090	18606500	13643300	8046830	18267600	12400000	11098500	34463500	14491200	9199580	15999700	13752300	9048620	14609700	10214700	6575120	16108600	10869100	3	4	1.10335e+07	1.24259e+07	1.37445e+07	1.19606e+07	1.21996e+07	1.2492e+07	1.64965e+07	2.30156e+07	1.45987e+07	1.3674e+07	1.0685e+07	1.38543e+07	1.34496e+07	9.75673e+06	1.02905e+07	9.77308e+06	1.07577e+07	1.09497e+07	1.2817e+07	1.31672e+07	1.17319e+07	1.27309e+07	1.2318e+07	1.30917e+07	1.32429e+07	1.28583e+07	1.41616e+07
396	MAC_00858	7.97736	226924000	297892000	205311000	244888000	300752000	153806000	332780000	555783000	169440000	271741000	280308000	211162000	307502000	245197000	150747000	221887000	269179000	136385000	3	10	2.06431e+08	2.29835e+08	2.92522e+08	2.22773e+08	2.32042e+08	2.19139e+08	3.02728e+08	4.28808e+08	2.41414e+08	2.47201e+08	2.16269e+08	3.00859e+08	2.79733e+08	1.89179e+08	2.14781e+08	2.01849e+08	2.07682e+08	1.94318e+08	2.39799e+08	2.43547e+08	2.49688e+08	2.37121e+08	2.34294e+08	2.29661e+08	2.4302e+08	2.39565e+08	2.34186e+08
397	MAC_00861	6.5044	3621120	9238310	38211100	3609100	6478300	29863200	4420500	20825600	30559500	5486060	9595930	36293800	4476790	8328830	25923700	3874450	8967630	30377900	3	3	9.4146e+06	1.0282e+07	1.32053e+07	9.38335e+06	7.21016e+06	1.03203e+07	1.14929e+07	2.31783e+07	1.0561e+07	1.42633e+07	1.068e+07	1.25427e+07	1.16393e+07	9.26975e+06	8.95889e+06	1.00732e+07	9.98071e+06	1.04982e+07	1.09364e+07	1.08954e+07	1.12716e+07	9.98767e+06	7.28015e+06	1.08158e+07	9.22614e+06	1.29492e+07	1.02447e+07
398	MAC_00862	8.10934	218957000	222687000	298898000	216972000	32822900	261889000	274273000	386475000	373177000	245507000	223511000	402921000	245085000	190415000	306557000	199101000	179265000	91664700	3	7	2.04504e+08	2.89305e+08	2.4633e+08	2.0265e+08	4.26421e+07	2.1583e+08	2.56169e+08	5.02092e+08	3.07546e+08	2.29302e+08	2.90376e+08	3.32059e+08	2.28907e+08	2.47379e+08	2.52642e+08	1.85959e+08	2.32893e+08	7.55435e+07	2.37561e+08	3.06565e+08	2.1026e+08	2.15702e+08	4.3056e+07	2.26193e+08	2.05644e+08	2.80507e+08	2.98337e+08
399	MAC_00864	7.85134	168074000	169119000	338797000	216891000	196467000	300186000	289357000	373444000	324615000	244837000	162640000	373029000	241001000	137413000	274196000	155905000	141582000	284457000	3	12	1.81543e+08	2.12405e+08	2.4974e+08	2.34272e+08	2.46753e+08	2.21278e+08	3.12545e+08	4.69027e+08	2.39286e+08	2.64458e+08	2.04268e+08	2.74973e+08	2.60314e+08	1.72584e+08	2.0212e+08	1.68399e+08	1.7782e+08	2.09684e+08	2.10888e+08	2.25077e+08	2.1317e+08	2.4936e+08	2.49148e+08	2.31902e+08	2.50901e+08	2.62035e+08	2.32121e+08
400	MAC_00867	6.89739	88234700	81888300	60201600	101436000	94191600	48157700	128037000	159356000	49686800	108605000	82627600	54022300	114621000	77071200	41455900	92930300	85270000	42665400	3	14	6.58988e+07	6.85694e+07	9.62634e+07	7.57583e+07	7.88716e+07	7.7005e+07	9.56255e+07	1.33437e+08	7.945e+07	8.11126e+07	6.91885e+07	8.63826e+07	8.56057e+07	6.45358e+07	6.62887e+07	6.94058e+07	7.14011e+07	6.82227e+07	7.65508e+07	7.26601e+07	8.21674e+07	8.06374e+07	7.96372e+07	8.07022e+07	7.67651e+07	7.45483e+07	7.70711e+07
401	MAC_00868	7.43235	278919000	391332000	430476000	299339000	352065000	355421000	404324000	744830000	360585000	362485000	323899000	459344000	349361000	303072000	334987000	233350000	322170000	348603000	3	35	3.16357e+08	3.64634e+08	4.07323e+08	3.39517e+08	3.28046e+08	3.36305e+08	4.58594e+08	6.94015e+08	3.41191e+08	4.11139e+08	3.01801e+08	4.34638e+08	3.96253e+08	2.82395e+08	3.1697e+08	2.64671e+08	3.0019e+08	3.29853e+08	3.67493e+08	3.86387e+08	3.47678e+08	3.61384e+08	3.3123e+08	3.52451e+08	3.68144e+08	3.8773e+08	3.30975e+08
402	MAC_00869	6.93163	23433800	58493200	66751200	26976100	70216600	60216700	46110400	155498000	77035200	31655600	59886100	68910200	32517000	52397200	52010900	21817000	57120500	52621000	3	6	4.00678e+07	4.22933e+07	5.39934e+07	4.61245e+07	5.07698e+07	4.87078e+07	7.88409e+07	1.12432e+08	6.23119e+07	5.41256e+07	4.33004e+07	5.57398e+07	5.55985e+07	3.78856e+07	4.20703e+07	3.73033e+07	4.13007e+07	4.25638e+07	4.65444e+07	4.48164e+07	4.60871e+07	4.90951e+07	5.12626e+07	5.10464e+07	6.32909e+07	6.28133e+07	6.04461e+07
403	MAC_00870	6.47618	22355000	10331700	10202200	24042100	11755100	9272840	30468800	19014600	9805780	32068400	11766100	10533800	31127000	10459900	7389900	18957500	11246000	6943320	3	5	1.21326e+07	1.20183e+07	1.61601e+07	1.30482e+07	1.36741e+07	1.4688e+07	1.65362e+07	2.21187e+07	1.55321e+07	1.74043e+07	1.36869e+07	1.66853e+07	1.68934e+07	1.21674e+07	1.17054e+07	1.02887e+07	1.30819e+07	1.09981e+07	1.40937e+07	1.27353e+07	1.37937e+07	1.38886e+07	1.38068e+07	1.53932e+07	1.32747e+07	1.23572e+07	1.50671e+07
404	MAC_00871	7.5003	81853700	75152900	NA	78752000	70623600	NA	70686400	87748700	NA	76535500	73039900	NA	103246000	68559300	NA	88466200	79630200	NA	2	3	7.48147e+07	7.51529e+07	NA	7.19797e+07	70623600	NA	6.46077e+07	8.77487e+07	NA	6.99538e+07	7.30399e+07	NA	9.43674e+07	68559300	NA	8.08585e+07	7.96302e+07	NA	8.69079e+07	7.96363e+07	NA	7.66155e+07	7.13091e+07	NA	5.1865e+07	4.90232e+07	NA
405	MAC_00875	7.31133	35577300	62179800	105513000	35896300	52743500	65230600	39523900	81874400	63601900	39273000	52078800	107198000	48265400	48492800	70068500	36857600	49703600	72367800	3	6	5.09631e+07	6.11421e+07	7.49086e+07	5.14201e+07	5.18633e+07	4.63103e+07	5.66165e+07	8.0508e+07	4.5154e+07	5.62571e+07	5.12097e+07	7.61049e+07	6.91383e+07	4.76835e+07	4.97449e+07	5.27971e+07	4.88741e+07	5.13773e+07	5.92009e+07	6.47897e+07	6.39397e+07	5.47317e+07	5.23667e+07	4.85337e+07	4.54499e+07	4.4978e+07	4.3802e+07
406	MAC_00876	6.86546	33188800	62619800	37127900	19519700	59091500	21280000	21276800	94518900	22632500	27351600	70691900	31476700	29987800	56941000	24469100	23444800	63577800	23431000	3	5	4.63673e+07	3.31523e+07	5.0197e+07	2.72705e+07	3.12843e+07	2.87706e+07	2.97253e+07	5.00404e+07	3.05992e+07	3.82123e+07	3.74258e+07	4.25566e+07	4.18953e+07	3.01458e+07	3.30823e+07	3.27542e+07	3.36595e+07	3.16788e+07	5.38622e+07	3.51301e+07	4.28466e+07	2.90269e+07	3.1588e+07	3.0152e+07	2.38625e+07	2.79564e+07	2.9683e+07
407	MAC_00877	7.16136	146590000	256671000	350908000	140461000	172998000	198531000	144879000	266196000	205721000	167933000	171137000	348444000	214066000	157182000	252278000	127182000	159276000	229486000	3	9	1.86827e+08	2.62879e+08	2.68831e+08	1.79016e+08	1.77182e+08	1.52095e+08	1.84646e+08	2.72634e+08	1.57603e+08	2.14028e+08	1.75276e+08	2.66943e+08	2.72824e+08	1.60983e+08	1.93271e+08	1.62092e+08	1.63128e+08	1.7581e+08	2.17026e+08	2.78561e+08	2.29466e+08	1.90545e+08	1.78902e+08	1.59397e+08	1.48228e+08	1.52314e+08	1.52884e+08
408	MAC_00879	8.72672	534705000	674050000	1052970000	596166000	814155000	1044040000	844228000	1689430000	1198240000	725618000	724824000	1134450000	761116000	643378000	792637000	492733000	662838000	912499000	3	8	6.69854e+08	6.72671e+08	8.42247e+08	7.4685e+08	8.12489e+08	8.35104e+08	1.05761e+09	1.68597e+09	9.58445e+08	9.09022e+08	7.23341e+08	9.07421e+08	9.53492e+08	6.42062e+08	6.34012e+08	6.17274e+08	6.61482e+08	7.29887e+08	7.78131e+08	7.12801e+08	7.18916e+08	7.9495e+08	8.20376e+08	8.75199e+08	8.49016e+08	9.41915e+08	9.29747e+08
409	MAC_00880	7.74632	131309000	108858000	214914000	154965000	112597000	197932000	285858000	337231000	294649000	174449000	104266000	239861000	175969000	87162000	163410000	123990000	101346000	154670000	3	6	1.27518e+08	1.41764e+08	1.69934e+08	1.50491e+08	1.46634e+08	1.56507e+08	2.77605e+08	4.39171e+08	2.32982e+08	1.69412e+08	1.35784e+08	1.8966e+08	1.70889e+08	1.1351e+08	1.2921e+08	1.2041e+08	1.31982e+08	1.22299e+08	1.4813e+08	1.50222e+08	1.45051e+08	1.60183e+08	1.48057e+08	1.64021e+08	2.22852e+08	2.45355e+08	2.26006e+08
410	MAC_00881	9.28918	1220750000	1633610000	2200890000	1312260000	1895380000	1884540000	1854660000	3458460000	2284020000	1608300000	1702540000	2201660000	1640190000	1489620000	1570200000	1058710000	1553090000	1660880000	3	20	1.48328e+09	1.51375e+09	1.95477e+09	1.59447e+09	1.75631e+09	1.6738e+09	2.25352e+09	3.20471e+09	2.0286e+09	1.95418e+09	1.57762e+09	1.95545e+09	1.99293e+09	1.38032e+09	1.39461e+09	1.28639e+09	1.43914e+09	1.47515e+09	1.72304e+09	1.60406e+09	1.66853e+09	1.69716e+09	1.77336e+09	1.75416e+09	1.80905e+09	1.7904e+09	1.96786e+09
411	MAC_00885	6.92413	32776700	42069100	79839800	37609400	45578100	68735500	47601000	74937000	69802400	39253300	40090400	80671800	41981800	35793600	58630700	33072900	40387400	63329900	3	8	4.21731e+07	4.61491e+07	5.65652e+07	4.83912e+07	4.99984e+07	4.8698e+07	6.12472e+07	8.22046e+07	4.94539e+07	5.05064e+07	4.39785e+07	5.71547e+07	5.40171e+07	3.9265e+07	4.15389e+07	4.25542e+07	4.43043e+07	4.48682e+07	4.899e+07	4.89022e+07	4.82823e+07	5.15078e+07	5.04837e+07	5.10361e+07	4.91673e+07	4.59258e+07	4.79731e+07
412	MAC_00886	7.18617	22959900	50650100	63662900	27157200	60148800	53225600	37141500	121634000	64026900	33679200	52721300	66582000	32119800	45683400	45513500	20134600	49155700	51874000	3	7	3.71862e+07	3.89727e+07	5.10851e+07	4.39842e+07	4.62815e+07	4.27099e+07	6.01549e+07	9.35913e+07	5.13772e+07	5.45473e+07	4.05664e+07	5.34275e+07	5.20217e+07	3.51511e+07	3.65215e+07	3.26103e+07	3.78229e+07	4.16253e+07	4.3197e+07	4.12977e+07	4.36047e+07	4.6817e+07	4.67307e+07	4.47605e+07	4.82904e+07	5.22873e+07	4.98388e+07
413	MAC_00887	7.32536	105474000	87866600	71020300	102870000	93137300	60563800	109126000	150975000	61813700	119199000	83585900	69233400	135595000	78125200	49527800	87562500	79116300	57347800	3	10	8.24521e+07	8.0675e+07	9.89489e+07	8.04164e+07	8.55143e+07	8.43804e+07	8.53069e+07	1.38618e+08	8.61219e+07	9.31813e+07	7.67447e+07	9.64593e+07	1.05999e+08	7.17309e+07	6.90045e+07	6.84501e+07	7.26409e+07	7.98997e+07	9.57798e+07	8.54879e+07	8.44598e+07	8.55956e+07	8.63444e+07	8.84317e+07	6.84817e+07	7.74428e+07	8.35432e+07
414	MAC_00888	7.05127	35287200	35657100	53147100	37715400	34854100	38892100	46786800	66037100	42826300	35608400	31350000	45474700	45143600	30665600	34039400	36235600	31200300	37141600	3	10	3.51917e+07	3.79333e+07	5.00936e+07	3.76133e+07	3.7079e+07	3.66576e+07	4.66602e+07	7.02526e+07	4.03658e+07	3.5512e+07	3.33512e+07	4.2862e+07	4.50214e+07	3.26231e+07	3.20837e+07	3.61375e+07	3.3192e+07	3.50077e+07	4.08801e+07	4.01963e+07	4.27584e+07	4.00358e+07	3.74389e+07	3.84176e+07	3.74573e+07	3.92485e+07	3.91572e+07
415	MAC_00889	7.97831	388898000	575202000	473616000	380427000	588579000	340085000	481049000	885405000	339778000	464823000	506738000	463330000	508046000	403659000	328726000	355738000	415804000	367869000	3	15	4.06178e+08	4.71767e+08	5.5289e+08	3.9733e+08	4.82739e+08	3.97008e+08	5.02423e+08	7.26189e+08	3.9665e+08	4.85476e+08	4.15615e+08	5.40882e+08	5.3062e+08	3.31072e+08	3.83748e+08	3.71544e+08	3.41033e+08	4.29443e+08	4.71833e+08	4.99912e+08	4.7193e+08	4.2292e+08	4.87425e+08	4.1607e+08	4.03329e+08	4.05705e+08	3.84773e+08
416	MAC_00893	6.86805	29294200	43303500	30216800	30466200	47069100	23857100	40513400	75684800	24046400	35970100	39221200	31928500	38169100	32637600	23228500	27451500	35905400	25907100	3	5	2.96879e+07	3.33385e+07	3.87282e+07	3.08757e+07	3.62376e+07	3.05771e+07	4.10579e+07	5.82683e+07	3.08197e+07	3.64535e+07	3.01956e+07	4.0922e+07	3.86821e+07	2.51271e+07	2.97714e+07	2.78204e+07	2.76429e+07	3.32045e+07	3.44867e+07	3.53274e+07	3.30572e+07	3.28642e+07	3.65893e+07	3.20452e+07	3.296e+07	3.25531e+07	2.98969e+07
417	MAC_00896	6.24124	3470310	NA	5442190	4208840	NA	5271820	4899550	NA	3919210	5283730	NA	7003190	5300730	NA	4355800	3565570	NA	6461860	2	2	3.81357e+06	NA	4.95234e+06	4.62515e+06	NA	4.7973e+06	5.38418e+06	NA	3.56644e+06	5.80636e+06	NA	6.37283e+06	5.82504e+06	NA	3.96373e+06	3.91825e+06	NA	5.88023e+06	4.43e+06	NA	4.22716e+06	4.92303e+06	NA	5.02763e+06	4.32225e+06	NA	3.45965e+06
418	MAC_00900	8.01525	125375000	202146000	495651000	133831000	279891000	400760000	179541000	518879000	477027000	155466000	246531000	500863000	166492000	236404000	405907000	103842000	219727000	347338000	3	3	2.25359e+08	1.9166e+08	2.90835e+08	2.40559e+08	2.65371e+08	2.35155e+08	3.22722e+08	4.91962e+08	2.79907e+08	2.79447e+08	2.33742e+08	2.93893e+08	2.99266e+08	2.2414e+08	2.38175e+08	1.86654e+08	2.08328e+08	2.03809e+08	2.61787e+08	2.03093e+08	2.48247e+08	2.56052e+08	2.67947e+08	2.46445e+08	2.59071e+08	2.74848e+08	2.71526e+08
419	MAC_00901	6.28695	4118710	12784200	13683100	4170190	9426160	10100900	4158460	17292200	10142400	4058280	9086270	10415100	5849540	8811590	7859840	4769140	10538800	10610600	3	2	7.33836e+06	9.28871e+06	1.05697e+07	7.43009e+06	6.84884e+06	7.80261e+06	7.40919e+06	1.25641e+07	7.83467e+06	7.2307e+06	6.60188e+06	8.04532e+06	1.04222e+07	6.4023e+06	6.07147e+06	8.49725e+06	7.65726e+06	8.19634e+06	8.52455e+06	9.84286e+06	9.02201e+06	7.90861e+06	6.91532e+06	8.17723e+06	5.94786e+06	7.01929e+06	7.60008e+06
420	MAC_00902	6.97322	28744600	33279600	31050900	28779600	26270700	22936900	34743900	50901800	21974800	35523500	21405500	28603700	36100800	20609200	23104900	24051900	21437900	23636400	3	5	2.56744e+07	3.36548e+07	3.43765e+07	2.57057e+07	2.65669e+07	2.53935e+07	3.10329e+07	5.14757e+07	2.43283e+07	3.17292e+07	2.16468e+07	3.16672e+07	3.22449e+07	2.08415e+07	2.55795e+07	2.14829e+07	2.16796e+07	2.61679e+07	2.98244e+07	3.56626e+07	2.93427e+07	2.73612e+07	2.68248e+07	2.66127e+07	2.49122e+07	2.87583e+07	2.35999e+07
421	MAC_00905	8.10096	162971000	375624000	452706000	160371000	393369000	346607000	217248000	598700000	351974000	192563000	323170000	448264000	210758000	277632000	318394000	148152000	290167000	356611000	3	15	2.63116e+08	3.00571e+08	3.50418e+08	2.58918e+08	3.14771e+08	2.68291e+08	3.50746e+08	4.79075e+08	2.72446e+08	3.10892e+08	2.58598e+08	3.46979e+08	3.40268e+08	2.22159e+08	2.46453e+08	2.39191e+08	2.32189e+08	2.76035e+08	3.05646e+08	3.18502e+08	2.99106e+08	2.75593e+08	3.17826e+08	2.81173e+08	2.81567e+08	2.67648e+08	2.64288e+08
422	MAC_00909	7.33937	106440000	107180000	61223400	88661800	103051000	37119500	114344000	117360000	30965700	114332000	102336000	41880200	153134000	102356000	33494200	84472700	101078000	37260400	3	5	7.53257e+07	7.77809e+07	1.19212e+08	6.27444e+07	7.47845e+07	7.22777e+07	8.09192e+07	8.51686e+07	6.02953e+07	8.09107e+07	7.42656e+07	8.15476e+07	1.0837e+08	7.42801e+07	6.52187e+07	5.97798e+07	7.33527e+07	7.25521e+07	8.75015e+07	8.24211e+07	1.01756e+08	6.67854e+07	7.55104e+07	7.5748e+07	6.49593e+07	4.75817e+07	5.84899e+07
423	MAC_00912	7.10545	56723800	53652800	57454000	66616200	57530300	34960700	69873200	79740900	28123500	72213500	48380100	47113300	75112900	49634300	36083800	55804800	50260300	37828200	3	8	4.52176e+07	5.04395e+07	7.66654e+07	5.31034e+07	5.40848e+07	4.66508e+07	5.56997e+07	7.49652e+07	3.75274e+07	5.75653e+07	4.54826e+07	6.2867e+07	5.98766e+07	4.66617e+07	4.81494e+07	4.4485e+07	4.72502e+07	5.04771e+07	5.25267e+07	5.34486e+07	6.54392e+07	5.65235e+07	5.46098e+07	4.88906e+07	4.47139e+07	4.18813e+07	3.64037e+07
424	MAC_00913	8.27383	150983000	201679000	526251000	187938000	251115000	380822000	237141000	504581000	490375000	212131000	223591000	509284000	204893000	196644000	338372000	150050000	233329000	328957000	3	9	2.18233e+08	2.1641e+08	3.39299e+08	2.71649e+08	2.69458e+08	2.45534e+08	3.42767e+08	5.41438e+08	3.16168e+08	3.06618e+08	2.39923e+08	3.28359e+08	2.96156e+08	2.11008e+08	2.18164e+08	2.16885e+08	2.50372e+08	2.12094e+08	2.53509e+08	2.29321e+08	2.89615e+08	2.89144e+08	2.72073e+08	2.57323e+08	2.75163e+08	3.02489e+08	3.06701e+08
425	MAC_00918	6.61287	4490810	8615430	NA	5237350	11880200	NA	4940710	14368600	NA	5562590	9178990	NA	7483320	9858510	NA	3459170	9566490	NA	2	2	9.24433e+06	8.61543e+06	NA	1.07811e+07	11880200	NA	1.01705e+07	14368600	NA	1.14506e+07	9178990	NA	1.54044e+07	9.85851e+06	NA	7.1207e+06	9566490	NA	1.07386e+07	9.12941e+06	NA	1.14754e+07	1.19955e+07	NA	8.16451e+06	8.02741e+06	NA
426	MAC_00919	7.38157	50753700	79306100	78056400	62801900	92105900	60170500	84593500	178163000	69808600	65898100	72273000	73181700	71015200	68202200	53811200	55138700	71883300	52258600	3	9	5.62806e+07	6.41659e+07	8.70001e+07	6.96407e+07	7.45222e+07	6.70649e+07	9.38054e+07	1.4415e+08	7.78073e+07	7.30741e+07	5.84755e+07	8.15669e+07	7.87484e+07	5.51819e+07	5.99769e+07	6.11431e+07	5.81602e+07	5.82464e+07	6.53778e+07	6.79939e+07	7.42606e+07	7.41259e+07	7.52455e+07	7.02848e+07	7.53039e+07	8.05335e+07	7.54776e+07
427	MAC_00921	7.00413	59270800	51063300	101478000	65856100	56024000	85773200	93061300	113689000	93709900	75600500	49612500	96150600	78464600	44911700	69902100	54644800	52262100	77641100	3	13	5.97693e+07	6.22084e+07	8.26027e+07	6.641e+07	6.82518e+07	6.98191e+07	9.3844e+07	1.38503e+08	7.62795e+07	7.62364e+07	6.04409e+07	7.82663e+07	7.91246e+07	5.47141e+07	5.69001e+07	5.51044e+07	6.36688e+07	6.31996e+07	6.94305e+07	6.59196e+07	7.05072e+07	7.06871e+07	6.89143e+07	7.31713e+07	7.5335e+07	7.73783e+07	7.39956e+07
428	MAC_00924	6.11789	3801480	NA	4706750	4004950	NA	4141080	5553060	NA	4941560	4446670	NA	5054320	4935250	NA	3615180	3242730	NA	3802220	2	2	3.83532e+06	NA	4.66522e+06	4.04061e+06	NA	4.10454e+06	5.6025e+06	NA	4.89795e+06	4.48626e+06	NA	5.00972e+06	4.97919e+06	NA	3.58328e+06	3.2716e+06	NA	3.76867e+06	4.45527e+06	NA	3.98209e+06	4.30083e+06	NA	4.30161e+06	4.4975e+06	NA	4.7513e+06
429	MAC_00925	6.66321	9216060	14745500	43116200	8661030	15724000	33927000	10783800	25513800	39930800	10688100	15291900	40247800	11952200	13064900	28856900	8562660	14412700	32720600	3	3	1.66634e+07	1.64551e+07	2.13689e+07	1.56599e+07	1.7547e+07	1.68146e+07	1.9498e+07	2.84718e+07	1.97902e+07	1.9325e+07	1.70648e+07	1.99473e+07	2.16106e+07	1.45796e+07	1.43018e+07	1.5482e+07	1.60837e+07	1.62167e+07	1.93569e+07	1.74368e+07	1.82398e+07	1.66684e+07	1.77174e+07	1.76219e+07	1.56524e+07	1.59066e+07	1.91976e+07
430	MAC_00926	8.5057	508742000	662030000	928756000	545914000	665434000	741523000	744869000	1214000000	849828000	638621000	561067000	891840000	661999000	512940000	638066000	467701000	584726000	670664000	3	21	5.84092e+08	6.66475e+08	8.03547e+08	6.2677e+08	6.69902e+08	6.41556e+08	8.55192e+08	1.22215e+09	7.3526e+08	7.33208e+08	5.64834e+08	7.71608e+08	7.60048e+08	5.16384e+08	5.52046e+08	5.36973e+08	5.88652e+08	5.80249e+08	6.78506e+08	7.06236e+08	6.85883e+08	6.67136e+08	6.76405e+08	6.72358e+08	6.86521e+08	6.82788e+08	7.13245e+08
431	MAC_00927	6.65561	34041500	27456100	19800500	39651100	34166600	16956300	55857000	63399600	20155600	46226800	30794600	19537300	49056600	27151200	14653000	33825500	30322900	16375600	3	5	2.36579e+07	2.38731e+07	3.27673e+07	2.75564e+07	2.97078e+07	2.80605e+07	3.8819e+07	5.51259e+07	3.33549e+07	3.21263e+07	2.67759e+07	3.23317e+07	3.40929e+07	2.36079e+07	2.42488e+07	2.35077e+07	2.63657e+07	2.70995e+07	2.74819e+07	2.52973e+07	2.79691e+07	2.93311e+07	2.99962e+07	2.94077e+07	3.11626e+07	3.07976e+07	3.23562e+07
432	MAC_00929	6.31213	7029180	7742960	6086800	8610250	10383100	4727780	10476900	17490200	5366190	9343820	7765270	5442340	9849080	7921310	3987350	6811980	8229120	3954400	3	2	6.01035e+06	6.0081e+06	9.17412e+06	7.36225e+06	8.0567e+06	7.12578e+06	8.95834e+06	1.35714e+07	8.08801e+06	7.98949e+06	6.02541e+06	8.20278e+06	8.42152e+06	6.14649e+06	6.0098e+06	5.82463e+06	6.38533e+06	5.96013e+06	6.98187e+06	6.36652e+06	7.83075e+06	7.83641e+06	8.1349e+06	7.46791e+06	7.19147e+06	7.58203e+06	7.84583e+06
433	MAC_00930	6.73184	NA	17072000	10491000	NA	20884300	7705350	NA	44221500	9415400	NA	19119400	9161050	NA	17326700	7499990	NA	17231700	6330760	2	2	NA	17072000	2.67018e+07	NA	20884300	1.96118e+07	NA	44221500	2.39642e+07	NA	19119400	2.33168e+07	NA	17326700	1.90891e+07	NA	17231700	1.61131e+07	NA	1.80905e+07	2.27919e+07	NA	2.1087e+07	2.05534e+07	NA	2.47055e+07	2.32467e+07
434	MAC_00935	7.15248	117978000	154506000	131611000	122482000	126804000	104038000	156700000	223435000	85504000	143094000	120677000	136825000	154268000	107169000	94113900	106624000	109717000	103469000	3	15	1.11135e+08	1.41877e+08	1.52151e+08	1.15378e+08	1.16439e+08	1.20275e+08	1.47611e+08	2.05172e+08	9.88483e+07	1.34794e+08	1.10813e+08	1.58179e+08	1.4532e+08	9.84092e+07	1.08802e+08	1.0044e+08	1.00749e+08	1.19617e+08	1.29099e+08	1.50341e+08	1.29871e+08	1.22809e+08	1.1757e+08	1.2605e+08	1.18498e+08	1.14625e+08	9.58886e+07
435	MAC_00938	7.21577	50595600	84642700	107704000	56749600	96714100	92546600	76936600	175306000	100897000	64575500	80425600	106629000	70807600	74237200	77970500	47076300	79520700	82152600	3	14	6.8042e+07	7.30384e+07	9.28124e+07	7.6318e+07	8.34548e+07	7.97507e+07	1.03466e+08	1.51272e+08	8.69466e+07	8.68424e+07	6.93995e+07	9.1886e+07	9.52234e+07	6.40595e+07	6.719e+07	6.33091e+07	6.86186e+07	7.07938e+07	7.90404e+07	7.73957e+07	7.92218e+07	8.12331e+07	8.42649e+07	8.35798e+07	8.3059e+07	8.45122e+07	8.43432e+07
436	MAC_00939	6.40238	17074800	24315500	19103700	16684700	17276400	14735700	21385900	45797800	15005100	19524400	17918800	18968800	20509800	14516100	13447800	13150700	15437600	17836400	3	5	1.74258e+07	2.14346e+07	2.12348e+07	1.70277e+07	1.52295e+07	1.63795e+07	2.18255e+07	4.03717e+07	1.6679e+07	1.99258e+07	1.57958e+07	2.10849e+07	2.09314e+07	1.27962e+07	1.4948e+07	1.3421e+07	1.36085e+07	1.98261e+07	2.02425e+07	2.27133e+07	1.81254e+07	1.81243e+07	1.53773e+07	1.7166e+07	1.75208e+07	2.25547e+07	1.61796e+07
437	MAC_00941	6.4934	27163200	NA	9865090	30563200	NA	7946690	37784100	NA	8181570	34771000	NA	9400880	37578800	NA	7801640	25902500	NA	7463100	2	4	1.39294e+07	NA	1.92376e+07	1.56729e+07	NA	1.54966e+07	1.93758e+07	NA	1.59546e+07	1.78307e+07	NA	1.83323e+07	1.92705e+07	NA	1.52137e+07	1.32829e+07	NA	1.45535e+07	1.61809e+07	NA	1.64206e+07	1.66823e+07	NA	1.62406e+07	1.55543e+07	NA	1.54769e+07
438	MAC_00948	7.03704	36371400	93870200	46628000	40625300	109870000	38824000	53288300	190851000	46418200	42037800	97997300	44320400	47598900	89093000	33994600	33792200	98950000	37145200	3	8	4.97618e+07	4.91218e+07	6.51275e+07	5.55818e+07	5.74945e+07	5.42273e+07	7.29067e+07	9.98714e+07	6.48344e+07	5.75143e+07	5.12815e+07	6.19043e+07	6.51227e+07	4.6622e+07	4.74818e+07	4.6233e+07	5.17801e+07	5.18824e+07	5.78053e+07	5.20523e+07	5.55908e+07	5.91614e+07	5.80525e+07	5.68308e+07	5.85272e+07	5.57959e+07	6.28932e+07
439	MAC_00950	6.79578	21595000	48456500	26262600	24023500	49755500	20896500	32216100	93930400	24141600	26494300	50636600	24553800	27765100	44455200	18595600	18894300	46259500	20831700	3	5	2.69818e+07	2.80315e+07	3.6335e+07	3.00161e+07	2.8783e+07	2.89108e+07	4.02523e+07	5.43376e+07	3.34005e+07	3.31033e+07	2.92927e+07	3.39708e+07	3.46911e+07	2.57168e+07	2.57275e+07	2.36074e+07	2.67606e+07	2.88212e+07	3.13432e+07	2.97038e+07	3.10144e+07	3.19493e+07	2.90624e+07	3.02989e+07	3.23133e+07	3.03572e+07	3.24004e+07
440	MAC_00951	7.01873	70485400	72885300	45947600	66254600	62243000	34868300	75143400	108048000	36557200	72659700	58732100	38560600	88310900	58951200	29239400	68136200	62772300	32654100	3	4	5.45004e+07	5.98883e+07	7.23202e+07	5.12291e+07	5.11438e+07	5.48817e+07	5.81021e+07	8.87808e+07	5.754e+07	5.61817e+07	4.82589e+07	6.06933e+07	6.82834e+07	4.8439e+07	4.6022e+07	5.2684e+07	5.15787e+07	5.13966e+07	6.331e+07	6.34611e+07	6.17303e+07	5.45285e+07	5.16402e+07	5.75167e+07	4.66425e+07	4.95998e+07	5.58171e+07
441	MAC_00964	9.44053	1429280000	2525000000	3032840000	1454050000	2453660000	2437050000	1657540000	3579370000	2439290000	1793980000	2099520000	3153200000	1887450000	1772790000	2079810000	1263840000	1841010000	2683490000	3	18	1.92954e+09	2.31067e+09	2.45491e+09	1.96298e+09	2.24538e+09	1.97265e+09	2.2377e+09	3.27554e+09	1.97447e+09	2.42189e+09	1.9213e+09	2.55234e+09	2.54808e+09	1.62231e+09	1.68349e+09	1.7062e+09	1.68474e+09	2.17213e+09	2.24144e+09	2.44852e+09	2.09544e+09	2.08941e+09	2.26718e+09	2.06737e+09	1.79635e+09	1.82997e+09	1.91535e+09
442	MAC_00965	6.73884	28666100	29739400	70767400	29988300	31520200	61229800	39234700	49682900	57520800	34785200	27845000	69139100	37184100	25360100	52209500	25740700	29407400	58010500	3	9	3.51875e+07	3.74253e+07	4.58121e+07	3.68105e+07	3.96663e+07	3.96378e+07	4.81604e+07	6.25231e+07	3.72368e+07	4.26987e+07	3.50413e+07	4.4758e+07	4.56433e+07	3.19142e+07	3.37984e+07	3.15966e+07	3.70075e+07	3.75538e+07	4.08753e+07	3.9658e+07	3.91038e+07	3.91812e+07	4.00514e+07	4.15409e+07	3.86616e+07	3.49302e+07	3.61218e+07
443	MAC_00966	6.83336	9935580	16262600	NA	9508210	14342400	NA	13079700	27479300	NA	11308300	13325800	NA	12170800	12347000	NA	8296580	12117700	NA	2	2	1.43447e+07	16262600	NA	1.37277e+07	14342400	NA	1.88841e+07	27479300	NA	1.63266e+07	13325800	NA	1.75718e+07	12347000	NA	1.19783e+07	12117700	NA	1.66634e+07	1.72328e+07	NA	1.46118e+07	1.44816e+07	NA	1.51595e+07	1.53521e+07	NA
444	MAC_00972	6.58407	9216540	12623800	18091500	8944960	11880900	12830700	9715540	19248400	12173900	10344700	12010500	14584500	11696500	11608200	11261200	9359180	14179000	12774100	3	4	1.13303e+07	1.14218e+07	1.62652e+07	1.09964e+07	1.07496e+07	1.15354e+07	1.19437e+07	1.74156e+07	1.09449e+07	1.27172e+07	1.08669e+07	1.31122e+07	1.4379e+07	1.05029e+07	1.01244e+07	1.15056e+07	1.28289e+07	1.14846e+07	1.31617e+07	1.21032e+07	1.38834e+07	1.17046e+07	1.08539e+07	1.20893e+07	9.58804e+06	9.72968e+06	1.06172e+07
445	MAC_00974	7.07324	80825000	69854800	144728000	92091800	74549700	128263000	120617000	140538000	141139000	108002000	70229200	142413000	112957000	61863800	108812000	77565300	65798500	113176000	3	14	8.21227e+07	8.96487e+07	1.10991e+08	9.35704e+07	9.56739e+07	9.83641e+07	1.22554e+08	1.8036e+08	1.08239e+08	1.09736e+08	9.01292e+07	1.09216e+08	1.14771e+08	7.93934e+07	8.34472e+07	7.88106e+07	8.4443e+07	8.67939e+07	9.53971e+07	9.49969e+07	9.47385e+07	9.95966e+07	9.66026e+07	1.03087e+08	9.8382e+07	1.00763e+08	1.04998e+08
446	MAC_00977	8.07311	296792000	517665000	667155000	334193000	542918000	613325000	468061000	950140000	672084000	391362000	454289000	696218000	394753000	390809000	508145000	279188000	417952000	559232000	3	27	4.04974e+08	4.82078e+08	5.25029e+08	4.56008e+08	5.05595e+08	4.82666e+08	6.38672e+08	8.84822e+08	5.28908e+08	5.34016e+08	4.23059e+08	5.479e+08	5.38643e+08	3.63943e+08	3.99893e+08	3.80954e+08	3.8922e+08	4.40097e+08	4.70435e+08	5.10837e+08	4.48148e+08	4.85377e+08	5.10503e+08	5.0584e+08	5.12705e+08	4.9433e+08	5.13071e+08
447	MAC_00978	7.30885	18335500	55145700	130517000	19842400	58409800	92037700	26718900	96964700	81032800	23204000	51832100	116647000	25358200	49650400	91129800	16611500	54987100	85521600	3	6	4.28547e+07	4.63039e+07	6.65051e+07	4.63767e+07	4.90447e+07	4.68979e+07	6.24488e+07	8.14179e+07	4.12904e+07	5.42336e+07	4.35216e+07	5.94376e+07	5.92685e+07	4.16897e+07	4.64353e+07	3.88253e+07	4.61708e+07	4.35776e+07	4.97818e+07	4.90663e+07	5.67667e+07	4.93636e+07	4.95207e+07	4.91496e+07	5.01319e+07	4.54863e+07	4.00541e+07
448	MAC_00985	6.86198	NA	10566000	31473000	NA	13654600	29230400	NA	35385900	43036200	NA	11460200	32595800	NA	10184900	21225400	NA	11420400	26758300	2	2	NA	10566000	1.44289e+07	NA	13654600	1.34008e+07	NA	35385900	1.97301e+07	NA	11460200	1.49436e+07	NA	10184900	9.73084e+06	NA	11420400	1.22674e+07	NA	1.11963e+07	1.2316e+07	NA	1.37871e+07	1.40442e+07	NA	1.97693e+07	1.91393e+07
449	MAC_00987	6.9257	7136230	33665500	50632000	9358070	36871400	51368600	10442600	66857600	48260500	9069700	29091800	52925000	10929500	95993000	38589100	7454620	29313500	45405600	3	8	2.1098e+07	2.0478e+07	2.81548e+07	2.76667e+07	2.2428e+07	2.85644e+07	3.08731e+07	4.06679e+07	2.68361e+07	2.68142e+07	1.76959e+07	2.94298e+07	3.23126e+07	5.83903e+07	2.14581e+07	2.20393e+07	1.78307e+07	2.52486e+07	2.45083e+07	2.16996e+07	2.40321e+07	2.94486e+07	2.26457e+07	2.99358e+07	2.47839e+07	2.27202e+07	2.60325e+07
450	MAC_00988	6.89368	47503700	67250800	46026800	56364000	76084400	38410400	66078400	133678000	40649700	62581700	68054400	45966300	71146400	64663800	34428600	49024800	65509200	35018200	3	8	4.58407e+07	4.9455e+07	6.48596e+07	5.43908e+07	5.59511e+07	5.41268e+07	6.37652e+07	9.83043e+07	5.72823e+07	6.03909e+07	5.00459e+07	6.47743e+07	6.86558e+07	4.75526e+07	4.85157e+07	4.73086e+07	4.81743e+07	4.93466e+07	5.32505e+07	5.24054e+07	5.53621e+07	5.78938e+07	5.64942e+07	5.67255e+07	5.11886e+07	5.49204e+07	5.55672e+07
451	MAC_00993	7.09715	53760300	88772800	82146200	63500300	105055000	72437700	86084800	198805000	79316500	69823600	93772100	85952400	73740200	83473100	66005400	52469300	89464100	67786300	3	12	6.57409e+07	6.81373e+07	8.75202e+07	7.76515e+07	8.06346e+07	7.71766e+07	1.05269e+08	1.52592e+08	8.45054e+07	8.5384e+07	7.19745e+07	9.15754e+07	9.01734e+07	6.40695e+07	7.03235e+07	6.41622e+07	6.86679e+07	7.22209e+07	7.63674e+07	7.22022e+07	7.47046e+07	8.26526e+07	8.14173e+07	8.0882e+07	8.45066e+07	8.52497e+07	8.19752e+07
452	MAC_00994	7.64916	111344000	179530000	155607000	133288000	213058000	142980000	185993000	441735000	174571000	151828000	178187000	155055000	150135000	170520000	116267000	104239000	190336000	117392000	3	11	1.31005e+08	1.34658e+08	1.76324e+08	1.56824e+08	1.59806e+08	1.62016e+08	2.18836e+08	3.31328e+08	1.97813e+08	1.78638e+08	1.33651e+08	1.75698e+08	1.76646e+08	1.279e+08	1.31746e+08	1.22646e+08	1.42764e+08	1.33021e+08	1.52181e+08	1.42692e+08	1.50505e+08	1.66924e+08	1.61358e+08	1.69794e+08	1.75674e+08	1.85105e+08	1.9189e+08
453	MAC_00995	7.17902	93654500	82768100	108598000	104826000	93608900	77213600	114552000	163338000	75893700	111898000	81793000	97199500	128907000	76305100	70991600	97881400	83082900	75663300	3	5	8.17465e+07	8.3707e+07	1.23022e+08	9.14975e+07	9.46708e+07	8.74691e+07	9.99869e+07	1.65191e+08	8.59739e+07	9.76704e+07	8.27209e+07	1.10109e+08	1.12517e+08	7.71707e+07	8.04207e+07	8.54359e+07	8.40254e+07	8.57129e+07	9.49601e+07	8.87008e+07	1.05008e+08	9.73903e+07	9.55897e+07	9.16687e+07	8.02663e+07	9.22884e+07	8.33996e+07
454	MAC_00996	7.05601	28288300	31391700	57870300	31035300	23100500	36332800	39775200	40579700	34874600	32565500	23130500	57536500	36276400	19138400	40561000	28847500	22924300	38254300	3	2	2.87995e+07	4.02406e+07	4.43433e+07	3.15961e+07	2.96122e+07	2.78401e+07	4.04939e+07	5.20186e+07	2.67228e+07	3.3154e+07	2.96507e+07	4.40875e+07	3.69319e+07	2.45333e+07	3.108e+07	2.93688e+07	2.93864e+07	2.93125e+07	3.34547e+07	4.26413e+07	3.78501e+07	3.3631e+07	2.98997e+07	2.91768e+07	3.25072e+07	2.90616e+07	2.59227e+07
455	MAC_00997	7.34128	31266500	49716600	134949000	27411500	53710300	104016000	35260000	94235600	128901000	33534700	52360800	122906000	37432400	45169700	85957100	27946700	47522700	83908000	3	5	5.63595e+07	5.18436e+07	7.17939e+07	4.94106e+07	5.60082e+07	5.53373e+07	6.3558e+07	9.82673e+07	6.85764e+07	6.0448e+07	5.4601e+07	6.5387e+07	6.74738e+07	4.71022e+07	4.57299e+07	5.03754e+07	4.95559e+07	4.46397e+07	6.54695e+07	5.49365e+07	6.12811e+07	5.25929e+07	5.65519e+07	5.79942e+07	5.10223e+07	5.48997e+07	6.6523e+07
456	MAC_00998	7.02484	44722700	85957400	77790000	55586400	105975000	68807400	84883700	239796000	83696200	62025900	97696000	77354900	65194900	85134000	58007700	45204600	91399300	60231000	3	5	5.87357e+07	6.03018e+07	8.44312e+07	7.30033e+07	7.43448e+07	7.46817e+07	1.1148e+08	1.68224e+08	9.08416e+07	8.14605e+07	6.85368e+07	8.3959e+07	8.56224e+07	5.97242e+07	6.296e+07	5.93686e+07	6.41195e+07	6.53731e+07	6.82298e+07	6.38993e+07	7.20679e+07	7.7705e+07	7.50664e+07	7.82674e+07	8.94928e+07	9.39831e+07	8.81216e+07
457	MAC_00999	7.61334	82113800	93687000	126369000	85135000	104142000	93574800	116709000	185690000	95752700	96495000	94530800	119049000	108363000	91903300	87049100	73133200	94618900	84691100	3	6	8.84378e+07	8.72824e+07	1.25942e+08	9.16917e+07	9.70227e+07	9.32587e+07	1.25697e+08	1.72996e+08	9.54292e+07	1.03927e+08	8.80685e+07	1.18647e+08	1.16709e+08	8.56207e+07	8.6755e+07	7.87656e+07	8.81506e+07	8.4405e+07	1.02733e+08	9.24895e+07	1.075e+08	9.7597e+07	9.79645e+07	9.77363e+07	1.00906e+08	9.66489e+07	9.25719e+07
458	MAC_01000	6.97982	17079400	36731100	36917400	16859500	37997800	33720200	23015900	76492400	36156600	21114300	38271400	36297500	20876500	28800000	26938900	13689200	33526700	31782500	3	4	2.68549e+07	2.68678e+07	3.20983e+07	2.65091e+07	2.77944e+07	2.93185e+07	3.61891e+07	5.59522e+07	3.14368e+07	3.31992e+07	2.79945e+07	3.15593e+07	3.28253e+07	2.10664e+07	2.34224e+07	2.15243e+07	2.45239e+07	2.76337e+07	3.11957e+07	2.84707e+07	2.73981e+07	2.82164e+07	2.80642e+07	3.07261e+07	2.90515e+07	3.12592e+07	3.04955e+07
459	MAC_01001	6.58999	9790840	22690700	20704000	10536900	24563200	18282200	15655600	48275800	20175500	13394900	21325900	22058700	13460000	18796800	15680700	10007400	21565000	16790800	3	6	1.45272e+07	1.62253e+07	1.9514e+07	1.56342e+07	1.75643e+07	1.72314e+07	2.3229e+07	3.45204e+07	1.90159e+07	1.98747e+07	1.52494e+07	2.07909e+07	1.99713e+07	1.34409e+07	1.47794e+07	1.48485e+07	1.54204e+07	1.58257e+07	1.68754e+07	1.71933e+07	1.66566e+07	1.66411e+07	1.77348e+07	1.80587e+07	1.86475e+07	1.92857e+07	1.84465e+07
460	MAC_01002	6.71415	NA	17554300	32399400	NA	19869700	28634800	NA	30373200	30279300	NA	17069600	34770000	NA	15812700	23635200	NA	17212700	29207200	2	3	NA	17554300	2.09454e+07	NA	19869700	1.85117e+07	NA	30373200	1.95748e+07	NA	17069600	2.2478e+07	NA	15812700	1.52796e+07	NA	17212700	1.88817e+07	NA	1.86015e+07	1.78784e+07	NA	2.00626e+07	1.94005e+07	NA	1.69688e+07	1.89887e+07
461	MAC_01003	7.22416	NA	33549800	95499300	NA	32493800	67702400	NA	48453500	67972600	NA	30548700	82852700	NA	28905800	59005700	NA	30632400	74656500	2	5	NA	33549800	4.34805e+07	NA	32493800	3.08247e+07	NA	48453500	3.09477e+07	NA	30548700	3.77226e+07	NA	28905800	2.68651e+07	NA	30632400	3.39909e+07	NA	3.55513e+07	3.71136e+07	NA	3.28092e+07	3.23047e+07	NA	2.70699e+07	3.00211e+07
462	MAC_01004	6.50192	12504700	21005300	27876900	12662800	22654600	23449800	17159500	39456000	21805300	15426600	21339100	28889500	16178300	19644400	26477700	12216200	21380900	23731500	3	5	1.78963e+07	1.81993e+07	2.24816e+07	1.81226e+07	1.96283e+07	1.89114e+07	2.45581e+07	3.41852e+07	1.75851e+07	2.20781e+07	1.84885e+07	2.32983e+07	2.31539e+07	1.70202e+07	2.13532e+07	1.74834e+07	1.85247e+07	1.91385e+07	2.07891e+07	1.9285e+07	1.91896e+07	1.92898e+07	1.98188e+07	1.98193e+07	1.97145e+07	1.90985e+07	1.70586e+07
463	MAC_01006	6.59962	9475340	NA	22856300	11106700	NA	21486400	14455600	NA	23307000	12643700	NA	23576000	12917600	NA	17197800	9014860	NA	20598400	2	3	1.29552e+07	NA	1.67169e+07	1.51857e+07	NA	1.5715e+07	1.97645e+07	NA	1.70465e+07	1.72872e+07	NA	1.72433e+07	1.76617e+07	NA	1.25783e+07	1.23256e+07	NA	1.50655e+07	1.50493e+07	NA	1.4269e+07	1.61637e+07	NA	1.64695e+07	1.58663e+07	NA	1.65361e+07
464	MAC_01009	7.21812	53020500	93423900	74091100	62912400	113124000	65017500	92360800	229822000	80666400	61982000	102622000	74711100	80958000	92611100	57432700	50129900	84744000	55928600	3	4	6.40922e+07	6.59374e+07	8.68423e+07	7.60497e+07	7.98414e+07	7.62071e+07	1.11648e+08	1.62205e+08	9.45492e+07	7.4925e+07	7.24293e+07	8.7569e+07	9.78636e+07	6.53637e+07	6.73169e+07	6.0598e+07	5.98112e+07	6.5554e+07	7.44522e+07	6.9871e+07	7.41259e+07	8.09476e+07	8.06164e+07	7.9866e+07	8.9627e+07	9.06204e+07	9.17182e+07
465	MAC_01010	7.76145	206832000	253535000	449030000	242759000	327077000	399035000	320022000	565791000	462395000	290156000	282698000	457279000	285094000	236410000	320927000	193731000	260940000	333738000	3	24	2.57063e+08	2.59884e+08	3.52463e+08	3.01715e+08	3.35267e+08	3.13219e+08	3.97742e+08	5.79959e+08	3.62953e+08	3.60622e+08	2.89777e+08	3.58938e+08	3.54331e+08	2.4233e+08	2.51909e+08	2.4078e+08	2.67474e+08	2.61965e+08	2.98615e+08	2.75388e+08	3.00851e+08	3.21146e+08	3.38521e+08	3.28258e+08	3.19294e+08	3.2401e+08	3.52086e+08
466	MAC_01011	7.62286	117325000	248966000	293604000	125876000	181135000	263886000	169483000	384963000	283958000	145320000	149746000	307916000	134516000	124957000	220681000	95353400	145507000	236988000	3	8	1.69719e+08	2.44833e+08	2.06392e+08	1.82089e+08	1.78128e+08	1.85501e+08	2.4517e+08	3.78572e+08	1.99611e+08	2.10216e+08	1.4726e+08	2.16452e+08	1.94587e+08	1.22882e+08	1.5513e+08	1.37936e+08	1.43091e+08	1.66593e+08	1.97153e+08	2.59439e+08	1.7617e+08	1.93816e+08	1.79857e+08	1.94408e+08	1.96814e+08	2.11499e+08	1.93634e+08
467	MAC_01014	8.28915	586024000	583800000	1238270000	607194000	584970000	996143000	823001000	1168710000	1255290000	738622000	537743000	1210430000	753441000	476402000	872828000	501922000	531280000	907815000	3	35	6.72951e+08	7.1773e+08	8.77103e+08	6.97261e+08	7.19168e+08	7.05597e+08	9.45079e+08	1.43682e+09	8.89159e+08	8.48184e+08	6.61107e+08	8.57383e+08	8.65201e+08	5.85694e+08	6.1825e+08	5.76374e+08	6.53161e+08	6.43032e+08	7.81728e+08	7.60548e+08	7.48668e+08	7.42167e+08	7.26149e+08	7.39475e+08	7.58679e+08	8.02721e+08	8.62535e+08
468	MAC_01015	7.44098	74161300	133997000	202056000	86792900	150998000	177333000	120451000	263232000	192031000	102989000	133439000	207002000	104550000	119241000	156312000	70082700	127389000	162479000	3	19	1.09654e+08	1.2188e+08	1.5024e+08	1.28331e+08	1.37344e+08	1.31857e+08	1.78097e+08	2.3943e+08	1.42786e+08	1.52278e+08	1.21373e+08	1.53918e+08	1.54586e+08	1.08459e+08	1.16227e+08	1.03623e+08	1.1587e+08	1.20812e+08	1.27379e+08	1.29152e+08	1.2824e+08	1.36596e+08	1.38677e+08	1.38188e+08	1.42971e+08	1.33764e+08	1.38511e+08
469	MAC_01016	7.48074	26324900	51060800	85921900	27619000	59995900	72154900	33952100	98310800	82330000	30484700	51895000	81940200	33449000	48995000	64040500	23573000	53609200	69012700	3	6	4.58265e+07	4.38702e+07	5.74477e+07	4.80792e+07	5.1547e+07	4.8243e+07	5.91039e+07	8.44663e+07	5.50461e+07	5.30679e+07	4.45869e+07	5.47855e+07	5.82281e+07	4.20953e+07	4.28177e+07	4.10359e+07	4.60597e+07	4.61421e+07	5.32339e+07	4.64874e+07	4.90355e+07	5.11757e+07	5.20474e+07	5.05593e+07	4.74467e+07	4.71894e+07	5.33979e+07
470	MAC_01018	8.79159	887451000	873862000	1709590000	911550000	928860000	1003020000	1252470000	1732590000	1039510000	1108500000	810028000	1471850000	1037160000	764580000	1056810000	745185000	875436000	964413000	3	17	9.37911e+08	9.43722e+08	1.49787e+09	9.63381e+08	1.00312e+09	8.78802e+08	1.32369e+09	1.8711e+09	9.10773e+08	1.17153e+09	8.74785e+08	1.28957e+09	1.09613e+09	8.25703e+08	9.2593e+08	7.87556e+08	9.45421e+08	8.44976e+08	1.08952e+09	1.00002e+09	1.27853e+09	1.02543e+09	1.01285e+09	9.20995e+08	1.06261e+09	1.04534e+09	8.83503e+08
471	MAC_01020	6.49836	11172200	29428600	12812100	11058100	28805000	7683140	14795800	50307000	8376900	12880900	26194300	10252600	13221500	23090500	7853800	11074900	26283400	9045440	3	5	1.35957e+07	1.4851e+07	2.08628e+07	1.34568e+07	1.45363e+07	1.2511e+07	1.80053e+07	2.53871e+07	1.36407e+07	1.5675e+07	1.32188e+07	1.6695e+07	1.60895e+07	1.16525e+07	1.27889e+07	1.34773e+07	1.32638e+07	1.47293e+07	1.57933e+07	1.57369e+07	1.78078e+07	1.43235e+07	1.46774e+07	1.31117e+07	1.44541e+07	1.41832e+07	1.32322e+07
472	MAC_01021	6.39336	3629520	13147600	16761100	4617110	11614700	14429800	6749100	29290400	14547700	4954390	9503210	16118800	4660490	8235840	12332900	3457860	9836410	13379000	3	4	7.42646e+06	9.98993e+06	1.07809e+07	9.44719e+06	8.82518e+06	9.28137e+06	1.38095e+07	2.22557e+07	9.3572e+06	1.01373e+07	7.22081e+06	1.03677e+07	9.53595e+06	6.25783e+06	7.93263e+06	7.07522e+06	7.47399e+06	8.60549e+06	8.62688e+06	1.05859e+07	9.20223e+06	1.00556e+07	8.91085e+06	9.72699e+06	1.10858e+07	1.24337e+07	9.07703e+06
473	MAC_01022	8.21211	193704000	278429000	632013000	209414000	309995000	534793000	290718000	555440000	588034000	238152000	254536000	635049000	256543000	236649000	451265000	179565000	260604000	494479000	3	15	2.88072e+08	3.08766e+08	3.8322e+08	3.11436e+08	3.43771e+08	3.24271e+08	4.3235e+08	6.1596e+08	3.56553e+08	3.54175e+08	2.8227e+08	3.85061e+08	3.81525e+08	2.62434e+08	2.73624e+08	2.67045e+08	2.88999e+08	2.99826e+08	3.34637e+08	3.27186e+08	3.27105e+08	3.31494e+08	3.47108e+08	3.3984e+08	3.47076e+08	3.44122e+08	3.45877e+08
474	MAC_01023	7.74565	92734000	186655000	244750000	102036000	138944000	162245000	155030000	330023000	198048000	104041000	150554000	195430000	114618000	148715000	144347000	111856000	179023000	152625000	3	13	1.27388e+08	1.59082e+08	2.09051e+08	1.40166e+08	1.18419e+08	1.3858e+08	2.12964e+08	2.81271e+08	1.69161e+08	1.4292e+08	1.28314e+08	1.66925e+08	1.5745e+08	1.26746e+08	1.23293e+08	1.53656e+08	1.52577e+08	1.30363e+08	1.47979e+08	1.68572e+08	1.78439e+08	1.49193e+08	1.19568e+08	1.45234e+08	1.7096e+08	1.5714e+08	1.64096e+08
475	MAC_01024	8.47144	680264000	945618000	1772910000	704192000	779192000	1246970000	853949000	1296680000	1197900000	824196000	704751000	1511220000	811336000	614466000	1137130000	613766000	784943000	1265080000	3	18	8.58784e+08	1.06947e+09	1.24174e+09	8.88991e+08	8.81243e+08	8.7337e+08	1.07805e+09	1.46651e+09	8.39002e+08	1.04049e+09	7.97053e+08	1.05845e+09	1.02425e+09	6.94943e+08	7.96439e+08	7.74835e+08	8.87748e+08	8.86054e+08	9.97599e+08	1.13327e+09	1.05991e+09	9.46245e+08	8.89797e+08	9.15303e+08	8.65423e+08	8.19304e+08	8.1388e+08
476	MAC_01025	6.53574	14815700	NA	31982700	13500300	NA	25239300	16820200	NA	26031200	15989300	NA	28577000	18396600	NA	21238400	12352900	NA	25519700	2	2	1.94758e+07	NA	2.433e+07	1.77466e+07	NA	1.92002e+07	2.21108e+07	NA	1.98026e+07	2.10185e+07	NA	2.17392e+07	2.4183e+07	NA	1.61566e+07	1.62383e+07	NA	1.94135e+07	2.26239e+07	NA	2.07674e+07	1.88896e+07	NA	2.0122e+07	1.77498e+07	NA	1.92097e+07
477	MAC_01026	6.61832	17349500	18212500	91530500	20587600	21540600	69732400	31776400	46039200	77025600	24782400	18669700	77421300	23611400	16422300	56367300	15041600	16299100	62081500	3	6	2.57304e+07	2.74709e+07	4.0917e+07	3.05327e+07	3.24909e+07	3.11725e+07	4.71263e+07	6.94434e+07	3.44328e+07	3.67538e+07	2.81605e+07	3.46097e+07	3.50171e+07	2.47707e+07	2.51979e+07	2.23076e+07	2.45848e+07	2.77523e+07	2.98895e+07	2.91098e+07	3.49255e+07	3.24991e+07	3.28062e+07	3.26692e+07	3.78315e+07	3.87964e+07	3.34018e+07
478	MAC_01031	6.76221	NA	17030300	53167700	NA	16451300	45358400	NA	32749200	44904200	NA	14433100	54237900	NA	13065200	40334900	NA	15929500	42256300	2	6	NA	17030300	1.99046e+07	NA	16451300	1.6981e+07	NA	32749200	1.6811e+07	NA	14433100	2.03053e+07	NA	13065200	1.51003e+07	NA	15929500	1.58197e+07	NA	1.80463e+07	1.699e+07	NA	1.6611e+07	1.77963e+07	NA	1.82962e+07	1.63076e+07
479	MAC_01033	6.95284	35340400	55534800	60210200	40047500	65635500	53568400	54507700	125806000	60592600	46028700	59839400	58734700	48618500	53877500	45818800	34272600	55293800	48442700	3	11	4.43459e+07	4.49864e+07	5.92341e+07	5.02525e+07	5.31686e+07	5.27e+07	6.83975e+07	1.0191e+08	5.96103e+07	5.77578e+07	4.84734e+07	5.77825e+07	6.10076e+07	4.36439e+07	4.5076e+07	4.3006e+07	4.47912e+07	4.76574e+07	5.15141e+07	4.76702e+07	5.05604e+07	5.34889e+07	5.36847e+07	5.52302e+07	5.49073e+07	5.69349e+07	5.78254e+07
480	MAC_01034	7.21966	44825400	35193100	104075000	46933000	37506000	84792900	60474400	68855400	92408600	53075000	37555400	96504300	58428500	32782100	74696300	40387000	32688900	73847000	3	7	4.96311e+07	4.97976e+07	6.64302e+07	5.19647e+07	5.30703e+07	5.41226e+07	6.69579e+07	9.74291e+07	5.89836e+07	5.87652e+07	5.31402e+07	6.15979e+07	6.46926e+07	4.63861e+07	4.7678e+07	4.47169e+07	4.62542e+07	4.71359e+07	5.76536e+07	5.27684e+07	5.67028e+07	5.53114e+07	5.35854e+07	5.67211e+07	5.37516e+07	5.44314e+07	5.72175e+07
481	MAC_01035	7.28539	100261000	111671000	211758000	114535000	120456000	208542000	200846000	305560000	271896000	134458000	115930000	245483000	128726000	95047700	179162000	82357800	102632000	165327000	3	17	1.22633e+08	1.28929e+08	1.49953e+08	1.40092e+08	1.39071e+08	1.47676e+08	2.45662e+08	3.52781e+08	1.92539e+08	1.64461e+08	1.33846e+08	1.73835e+08	1.5745e+08	1.09736e+08	1.26871e+08	1.00735e+08	1.18493e+08	1.17074e+08	1.42456e+08	1.3662e+08	1.27995e+08	1.49114e+08	1.40421e+08	1.54766e+08	1.9721e+08	1.97091e+08	1.86774e+08
482	MAC_01037	8.56003	625112000	943014000	998604000	611913000	849451000	598161000	570254000	868329000	478116000	726634000	736360000	803982000	790813000	630540000	582041000	599274000	676724000	698127000	3	10	6.71361e+08	8.47642e+08	1.03443e+09	6.57186e+08	7.63542e+08	6.1962e+08	6.12445e+08	7.8051e+08	4.95268e+08	7.80394e+08	6.61888e+08	8.32824e+08	8.49322e+08	5.6677e+08	6.02921e+08	6.43612e+08	6.08283e+08	7.23172e+08	7.79881e+08	8.9821e+08	8.82956e+08	6.99511e+08	7.70953e+08	6.49369e+08	4.91651e+08	4.36053e+08	4.80439e+08
483	MAC_01038	7.32717	40449600	95314900	78787000	47640200	101395000	63298000	55330500	171992000	68730300	56751300	86706800	73511900	58559700	83636600	58137900	40622100	88703700	58161300	3	8	5.67225e+07	6.5191e+07	8.21461e+07	6.68059e+07	6.93495e+07	6.59967e+07	7.759e+07	1.17635e+08	7.16606e+07	7.95824e+07	5.93034e+07	7.66461e+07	8.21183e+07	5.72036e+07	6.06166e+07	5.69644e+07	6.06692e+07	6.0641e+07	6.58912e+07	6.90801e+07	7.01173e+07	7.11084e+07	7.00226e+07	6.91653e+07	6.22868e+07	6.57197e+07	6.95149e+07
484	MAC_01039	8.21748	297960000	565046000	597606000	269836000	566054000	514807000	337674000	820089000	573171000	410656000	466567000	632418000	369583000	381085000	408974000	216986000	348925000	482624000	3	17	4.1827e+08	4.89065e+08	4.91852e+08	3.7879e+08	4.89937e+08	4.23705e+08	4.74019e+08	7.09813e+08	4.71741e+08	5.7647e+08	4.03828e+08	5.20503e+08	5.18812e+08	3.29841e+08	3.36601e+08	3.046e+08	3.02005e+08	3.97217e+08	4.85879e+08	5.18241e+08	4.19829e+08	4.03185e+08	4.94693e+08	4.44048e+08	3.80527e+08	3.96556e+08	4.57616e+08
485	MAC_01040	7.18803	59087700	49849600	153881000	53796900	45895400	125836000	73684300	95082900	142481000	56554000	44819200	153854000	57111900	39187800	118467000	40457400	44783100	120119000	3	13	7.67326e+07	7.13242e+07	8.28184e+07	6.98619e+07	6.56666e+07	6.77246e+07	9.56881e+07	1.36044e+08	7.66829e+07	7.34423e+07	6.41268e+07	8.28038e+07	7.41668e+07	5.60694e+07	6.37586e+07	5.25389e+07	6.40751e+07	6.46477e+07	8.91358e+07	7.55793e+07	7.06912e+07	7.43612e+07	6.6304e+07	7.09762e+07	7.68153e+07	7.60044e+07	7.43869e+07
486	MAC_01041	6.50251	14162800	NA	17045800	16311200	NA	15602400	23312900	NA	17161600	19228400	NA	17862800	19120300	NA	11982200	13715600	NA	14516400	2	3	1.34164e+07	NA	1.79942e+07	1.54515e+07	NA	1.64705e+07	2.20842e+07	NA	1.81164e+07	1.8215e+07	NA	1.88566e+07	1.81126e+07	NA	1.26488e+07	1.29927e+07	NA	1.5324e+07	1.5585e+07	NA	1.53593e+07	1.64467e+07	NA	1.72612e+07	1.77285e+07	NA	1.7574e+07
487	MAC_01042	7.32071	81558100	215260000	261564000	97840900	274554000	228533000	127183000	464745000	263050000	108144000	233664000	256478000	113152000	210638000	187887000	79907900	226234000	208519000	3	19	1.48617e+08	1.50925e+08	2.0473e+08	1.78287e+08	1.92497e+08	1.78876e+08	2.31755e+08	3.25845e+08	2.05893e+08	1.97062e+08	1.63828e+08	2.00749e+08	2.06188e+08	1.47684e+08	1.47062e+08	1.4561e+08	1.58619e+08	1.63211e+08	1.72639e+08	1.59928e+08	1.74751e+08	1.8977e+08	1.94366e+08	1.87464e+08	1.86046e+08	1.82042e+08	1.99728e+08
488	MAC_01045	7.57214	84605900	44169600	129804000	95821700	52716900	117131000	136828000	107266000	150494000	113407000	50550700	128952000	116772000	43589300	100511000	81386600	47369000	97828200	3	6	7.18602e+07	7.09769e+07	9.51058e+07	8.13864e+07	8.47117e+07	8.58204e+07	1.16215e+08	1.72368e+08	1.10265e+08	9.63225e+07	8.12308e+07	9.44815e+07	9.91805e+07	7.00444e+07	7.36432e+07	6.91259e+07	7.61181e+07	7.16775e+07	8.34758e+07	7.52112e+07	8.11794e+07	8.66279e+07	8.5534e+07	8.99409e+07	9.32938e+07	9.62978e+07	1.06964e+08
489	MAC_01047	6.69578	19618600	81828600	64311500	21676400	84450700	63893700	30499100	179779000	69177900	24837000	73162800	69163000	24246900	66250000	47238400	17844900	71691100	60351300	3	9	4.27856e+07	4.67418e+07	5.16248e+07	4.72734e+07	4.82396e+07	5.12895e+07	6.65146e+07	1.02693e+08	5.55312e+07	5.41663e+07	4.17917e+07	5.55193e+07	5.28793e+07	3.7843e+07	3.79197e+07	3.89174e+07	4.09511e+07	4.84459e+07	4.97016e+07	4.95303e+07	4.40654e+07	5.0318e+07	4.87078e+07	5.3752e+07	5.33957e+07	5.7372e+07	5.38685e+07
490	MAC_01048	7.83951	151458000	209510000	363136000	162518000	204697000	253313000	215135000	367263000	282459000	171907000	180936000	329016000	182705000	164753000	249559000	147949000	192123000	249450000	3	11	1.93109e+08	2.15122e+08	2.77383e+08	2.0721e+08	2.1018e+08	1.93494e+08	2.74296e+08	3.77101e+08	2.15757e+08	2.19181e+08	1.85783e+08	2.5132e+08	2.32948e+08	1.69166e+08	1.90626e+08	1.88635e+08	1.9727e+08	1.90543e+08	2.24323e+08	2.27956e+08	2.36765e+08	2.20555e+08	2.12221e+08	2.02784e+08	2.20196e+08	2.10678e+08	2.09297e+08
491	MAC_01049	6.85207	18334100	24316900	NA	18463900	23210200	NA	23539100	42857800	NA	22063900	22440700	NA	24875300	21400200	NA	17490300	22822700	NA	2	3	2.25543e+07	24316900	NA	2.2714e+07	23210200	NA	2.89574e+07	42857800	NA	2.71426e+07	22440700	NA	3.06012e+07	21400200	NA	2.15163e+07	22822700	NA	2.62e+07	2.57676e+07	NA	2.41768e+07	2.34355e+07	NA	2.32461e+07	2.39437e+07	NA
492	MAC_01050	7.08183	50191800	36728300	209504000	59285400	45303400	187731000	87064000	89485300	207329000	67250900	39875200	214164000	70062300	34829700	155007000	48940500	36966300	164644000	3	13	6.46582e+07	6.6652e+07	8.96168e+07	7.63728e+07	8.22135e+07	8.03032e+07	1.12158e+08	1.62392e+08	8.86864e+07	8.66341e+07	7.23627e+07	9.16101e+07	9.02558e+07	6.32065e+07	6.63053e+07	6.30462e+07	6.70839e+07	7.04276e+07	7.51097e+07	7.06283e+07	7.64941e+07	8.12915e+07	8.30115e+07	8.41588e+07	9.00366e+07	9.07245e+07	8.6031e+07
493	MAC_01051	6.44031	NA	12799300	9416300	NA	14225600	8183480	NA	25939400	9144560	NA	13090600	8973000	NA	11842500	6838790	NA	10452400	6838310	2	2	NA	12799300	1.61949e+07	NA	14225600	1.40746e+07	NA	25939400	1.57275e+07	NA	13090600	1.54325e+07	NA	11842500	1.17619e+07	NA	10452400	1.17611e+07	NA	1.35629e+07	1.38235e+07	NA	1.43637e+07	1.47504e+07	NA	1.44917e+07	1.52566e+07
494	MAC_01053	7.70009	201445000	272726000	653141000	220280000	299704000	513682000	322132000	631452000	578919000	250186000	266741000	614827000	259317000	240010000	449331000	187937000	280878000	469080000	3	32	2.91398e+08	2.9854e+08	4.12478e+08	3.18643e+08	3.28071e+08	3.24406e+08	4.65976e+08	6.9122e+08	3.65605e+08	3.61904e+08	2.91988e+08	3.88282e+08	3.75112e+08	2.62727e+08	2.83766e+08	2.71858e+08	3.07463e+08	2.96238e+08	3.385e+08	3.1635e+08	3.52079e+08	3.39165e+08	3.31256e+08	3.39981e+08	3.74071e+08	3.86169e+08	3.54658e+08
495	MAC_01054	6.59214	43820100	26395200	32699600	51939200	31046000	27209400	71023300	56296900	31658700	54676100	26828500	32066300	56164500	23103700	22931700	41290900	26216800	25276800	3	6	2.97417e+07	3.10947e+07	4.08967e+07	3.52523e+07	3.65735e+07	3.40303e+07	4.82052e+07	6.63202e+07	3.95949e+07	3.71099e+07	3.16051e+07	4.01047e+07	3.81201e+07	2.72171e+07	2.86802e+07	2.80251e+07	3.08845e+07	3.16132e+07	3.45492e+07	3.29497e+07	3.49082e+07	3.75227e+07	3.69285e+07	3.56641e+07	3.86975e+07	3.70515e+07	3.84094e+07
496	MAC_01055	7.27539	123987000	155852000	106253000	138480000	188030000	101066000	197234000	344271000	115875000	164412000	167022000	120778000	170520000	153200000	82050600	114510000	158110000	92914400	3	15	1.17762e+08	1.18737e+08	1.46838e+08	1.31527e+08	1.43252e+08	1.3967e+08	1.87332e+08	2.62285e+08	1.60135e+08	1.56157e+08	1.27247e+08	1.66911e+08	1.61959e+08	1.16716e+08	1.13391e+08	1.08761e+08	1.20457e+08	1.28405e+08	1.36797e+08	1.2582e+08	1.25336e+08	1.39998e+08	1.44642e+08	1.46376e+08	1.50384e+08	1.46533e+08	1.55341e+08
497	MAC_01056	7.43612	91911800	161918000	242168000	105233000	182228000	222902000	143307000	380347000	254066000	123156000	159679000	239135000	124429000	145684000	179004000	84369400	156327000	185714000	3	15	1.37374e+08	1.43744e+08	1.82511e+08	1.57284e+08	1.61775e+08	1.67991e+08	2.14191e+08	3.37657e+08	1.91477e+08	1.84073e+08	1.41756e+08	1.80225e+08	1.85975e+08	1.29332e+08	1.34907e+08	1.26101e+08	1.38781e+08	1.39964e+08	1.5958e+08	1.5232e+08	1.55785e+08	1.67414e+08	1.63345e+08	1.76056e+08	1.71946e+08	1.88641e+08	1.85744e+08
498	MAC_01057	8.45816	546726000	954048000	907068000	464025000	751775000	517778000	362330000	644769000	345640000	549156000	737880000	633392000	707068000	708370000	488784000	491279000	813970000	655408000	3	14	6.47613e+08	7.55289e+08	9.67277e+08	5.49651e+08	5.95156e+08	5.52147e+08	4.2919e+08	5.10443e+08	3.68583e+08	6.50491e+08	5.84156e+08	6.75435e+08	8.37543e+08	5.60794e+08	5.21228e+08	5.81934e+08	6.44394e+08	6.98913e+08	7.52294e+08	8.00348e+08	8.25638e+08	5.85051e+08	6.00933e+08	5.78657e+08	3.4454e+08	2.85173e+08	3.57547e+08
499	MAC_01058	7.36768	73203400	102210000	50731000	79044400	105444000	37598100	98462700	158599000	39125400	91293300	86860400	50144400	94690800	76088200	32523500	74134700	85219600	41054400	3	6	6.08668e+07	7.23048e+07	8.62482e+07	6.57235e+07	7.45926e+07	6.39209e+07	8.18693e+07	1.12195e+08	6.65174e+07	7.59081e+07	6.14463e+07	8.52509e+07	7.8733e+07	5.38259e+07	5.52935e+07	6.16412e+07	6.02856e+07	6.9797e+07	7.07054e+07	7.66184e+07	7.36188e+07	6.99563e+07	7.53167e+07	6.69899e+07	6.5722e+07	6.26809e+07	6.45258e+07
500	MAC_01059	7.37737	88054600	70341000	71006800	58931700	50449500	30815500	51237300	76568400	28548400	79714600	59782400	58749400	77037600	65462900	37551400	54753700	76702800	30726000	3	6	7.39523e+07	5.9986e+07	9.91423e+07	4.94936e+07	4.30227e+07	4.30257e+07	4.30315e+07	6.52966e+07	3.98603e+07	6.6948e+07	5.09817e+07	8.20281e+07	6.46998e+07	5.5826e+07	5.24306e+07	4.59847e+07	6.54112e+07	4.29008e+07	8.59061e+07	6.35646e+07	8.46248e+07	5.26812e+07	4.34403e+07	4.50915e+07	3.45443e+07	3.64797e+07	3.86668e+07
501	MAC_01061	8.14404	174430000	343120000	395126000	200271000	344181000	324612000	281045000	678879000	369585000	240181000	301646000	416719000	226370000	252599000	300506000	157891000	278929000	295019000	3	18	2.43985e+08	2.90782e+08	3.33328e+08	2.8013e+08	2.91681e+08	2.73843e+08	3.93113e+08	5.75326e+08	3.11782e+08	3.35954e+08	2.55635e+08	3.51544e+08	3.16636e+08	2.14069e+08	2.53507e+08	2.20851e+08	2.36383e+08	2.48878e+08	2.83423e+08	3.0813e+08	2.84519e+08	2.98171e+08	2.94513e+08	2.8699e+08	3.15578e+08	3.21422e+08	3.02446e+08
502	MAC_01062	7.48072	76850000	147760000	224038000	98753600	182129000	199263000	143881000	379370000	244018000	103797000	153117000	218369000	112992000	144294000	165352000	75073000	152073000	159555000	3	15	1.18225e+08	1.25282e+08	1.71762e+08	1.51921e+08	1.54422e+08	1.52767e+08	2.21344e+08	3.21657e+08	1.87079e+08	1.5968e+08	1.29824e+08	1.67415e+08	1.73825e+08	1.22343e+08	1.26769e+08	1.15491e+08	1.28939e+08	1.22325e+08	1.37335e+08	1.32756e+08	1.4661e+08	1.61705e+08	1.55921e+08	1.60102e+08	1.77688e+08	1.79703e+08	1.81478e+08
503	MAC_01066	6.6786	10782700	27541800	33382200	12745100	39560000	33190600	18115000	82155700	38473900	13808100	32414700	35049800	16352100	29110300	24907300	10465400	30705900	25910600	3	4	2.00756e+07	1.85871e+07	2.65677e+07	2.37293e+07	2.66979e+07	2.64152e+07	3.37271e+07	5.54444e+07	3.062e+07	2.57084e+07	2.18757e+07	2.78949e+07	3.04449e+07	1.96457e+07	1.98228e+07	1.94848e+07	2.07225e+07	2.06213e+07	2.33207e+07	1.9696e+07	2.26774e+07	2.52575e+07	2.6957e+07	2.76835e+07	2.7075e+07	3.09755e+07	2.97032e+07
504	MAC_01069	7.6241	37863500	63590300	37284400	43246700	76705800	34596000	55244500	125554000	31849200	50276100	64564700	38426300	52412100	58857900	27911700	38154300	64948400	33853400	3	8	4.00327e+07	4.2087e+07	5.32815e+07	4.57243e+07	5.07675e+07	4.94396e+07	5.84094e+07	8.30975e+07	4.55143e+07	5.31564e+07	4.27319e+07	5.49133e+07	5.54147e+07	3.89549e+07	3.98873e+07	4.03401e+07	4.29859e+07	4.83784e+07	4.65036e+07	4.45978e+07	4.54794e+07	4.86691e+07	5.12603e+07	5.18133e+07	4.68892e+07	4.64247e+07	4.41515e+07
505	MAC_01071	7.24181	39404500	88934000	119920000	39043800	63078200	53459400	41714100	85340800	46202400	42494800	60193400	78897100	48779700	55601800	68425900	35836500	64929500	61728400	3	3	5.53406e+07	7.47164e+07	1.01636e+08	5.4834e+07	5.29941e+07	4.53083e+07	5.85843e+07	7.16976e+07	3.91578e+07	5.96807e+07	5.05704e+07	6.68675e+07	6.85074e+07	4.67129e+07	5.79929e+07	5.03296e+07	5.45494e+07	5.23165e+07	6.4286e+07	7.91737e+07	8.6753e+07	5.83656e+07	5.35084e+07	4.74837e+07	4.70296e+07	4.00558e+07	3.79854e+07
506	MAC_01072	6.85923	33312300	54209400	72860800	34790400	57720200	60083200	47473600	113030000	66513200	39897400	50855000	69767900	44065700	45825800	50026000	29836800	50654900	55890400	3	10	4.55994e+07	4.75376e+07	6.06983e+07	4.76227e+07	5.06164e+07	5.00536e+07	6.4984e+07	9.9119e+07	5.54103e+07	5.46134e+07	4.45961e+07	5.81217e+07	6.03191e+07	4.01858e+07	4.16753e+07	4.0842e+07	4.44206e+07	4.65607e+07	5.29701e+07	5.03736e+07	5.18102e+07	5.06897e+07	5.11077e+07	5.24568e+07	5.21671e+07	5.53755e+07	5.37512e+07
507	MAC_01074	7.53221	69361000	189714000	184689000	78153400	203872000	149922000	95905600	304189000	152593000	95015100	172782000	191791000	100030000	151402000	136656000	62615300	171365000	143691000	3	11	1.14858e+08	1.33416e+08	1.58594e+08	1.29418e+08	1.43372e+08	1.28739e+08	1.58815e+08	2.1392e+08	1.31033e+08	1.5734e+08	1.21508e+08	1.64692e+08	1.65645e+08	1.06473e+08	1.17347e+08	1.03688e+08	1.20512e+08	1.23388e+08	1.33424e+08	1.41375e+08	1.35371e+08	1.37753e+08	1.44764e+08	1.3492e+08	1.27492e+08	1.19512e+08	1.27109e+08
508	MAC_01075	7.35067	124473000	121040000	183511000	149916000	144453000	163296000	204494000	241668000	173058000	168819000	123802000	184079000	175506000	105173000	136996000	123255000	108084000	139835000	3	17	1.20527e+08	1.35077e+08	1.69824e+08	1.45164e+08	1.61205e+08	1.51117e+08	1.98012e+08	2.69694e+08	1.60151e+08	1.63468e+08	1.38159e+08	1.7035e+08	1.69943e+08	1.1737e+08	1.26778e+08	1.19348e+08	1.20618e+08	1.29406e+08	1.40009e+08	1.43135e+08	1.44957e+08	1.54513e+08	1.6277e+08	1.58372e+08	1.58957e+08	1.50672e+08	1.55356e+08
509	MAC_01076	7.15602	40193000	65298600	63581900	42001600	63786700	52447700	59941300	116498000	58875100	46937300	53841800	65834200	50989100	50404800	48759300	36348500	54315200	54048500	3	9	4.86794e+07	5.57774e+07	6.14589e+07	5.08698e+07	5.44859e+07	5.06965e+07	7.25973e+07	9.95114e+07	5.69092e+07	5.68477e+07	4.59911e+07	6.3636e+07	6.1755e+07	4.30553e+07	4.71312e+07	4.40231e+07	4.63955e+07	5.22438e+07	5.6548e+07	5.91049e+07	5.24594e+07	5.4146e+07	5.50148e+07	5.31305e+07	5.82788e+07	5.55947e+07	5.52053e+07
510	MAC_01078	7.27107	104418000	173708000	254996000	118568000	221197000	213814000	174302000	413635000	252482000	132566000	182278000	247898000	140204000	168775000	177643000	100934000	178877000	190636000	3	24	1.49204e+08	1.48731e+08	2.08423e+08	1.69423e+08	1.89392e+08	1.74763e+08	2.49062e+08	3.5416e+08	2.06369e+08	1.89425e+08	1.56069e+08	2.02622e+08	2.00339e+08	1.44507e+08	1.45198e+08	1.44226e+08	1.53157e+08	1.55818e+08	1.73322e+08	1.57604e+08	1.77904e+08	1.80334e+08	1.9123e+08	1.83154e+08	1.99939e+08	1.97861e+08	2.00189e+08
511	MAC_01080	8.30953	265501000	390271000	744319000	282721000	395927000	652059000	407867000	737724000	699160000	344365000	358115000	783105000	347995000	292820000	560915000	223012000	308708000	617440000	3	16	3.75282e+08	4.29168e+08	4.78857e+08	3.99623e+08	4.35388e+08	4.19502e+08	5.76515e+08	8.11251e+08	4.49804e+08	4.86756e+08	3.93807e+08	5.0381e+08	4.91887e+08	3.22005e+08	3.60864e+08	3.15225e+08	3.39476e+08	3.97229e+08	4.35944e+08	4.54771e+08	4.08738e+08	4.2536e+08	4.39614e+08	4.39643e+08	4.62808e+08	4.53227e+08	4.36336e+08
512	MAC_01085	7.20839	NA	41621500	27242000	NA	47604200	18194600	NA	96606100	22934300	NA	41592500	23283600	NA	35839200	16519300	NA	42373200	15712300	2	2	NA	41621500	6.44891e+07	NA	4.76042e+07	4.30715e+07	NA	96606100	5.42916e+07	NA	41592500	5.51185e+07	NA	35839200	3.91056e+07	NA	42373200	3.71952e+07	NA	4.41045e+07	5.50459e+07	NA	4.80663e+07	4.51394e+07	NA	5.39716e+07	5.2666e+07
513	MAC_01086	6.37725	14042800	NA	12883800	19131700	NA	11256200	35192300	NA	18549400	23956600	NA	18387200	24248600	NA	13629800	11927800	NA	8363530	2	2	1.1447e+07	NA	1.58055e+07	1.55952e+07	NA	1.38088e+07	2.86869e+07	NA	2.27559e+07	1.95282e+07	NA	2.25569e+07	1.97662e+07	NA	1.67207e+07	9.72291e+06	NA	1.02601e+07	1.32973e+07	NA	1.34911e+07	1.65995e+07	NA	1.44718e+07	2.30289e+07	NA	2.20745e+07
514	MAC_01087	7.24617	56609800	101473000	NA	59489100	105513000	NA	81108500	185094000	NA	70089800	89921000	NA	73312400	82439800	NA	49821300	86060000	NA	2	5	9.17119e+07	101473000	NA	9.63766e+07	105513000	NA	1.31402e+08	185094000	NA	1.13551e+08	89921000	NA	1.18771e+08	82439800	NA	8.07141e+07	86060000	NA	1.06536e+08	1.07527e+08	NA	1.02584e+08	1.06537e+08	NA	1.05485e+08	1.03408e+08	NA
515	MAC_01088	7.78288	361486000	452516000	566991000	415737000	559770000	490067000	607223000	1071810000	592137000	483759000	495600000	565346000	498963000	430549000	422568000	330682000	453811000	415795000	3	29	4.0603e+08	4.1039e+08	5.56604e+08	4.66966e+08	5.07659e+08	4.8109e+08	6.82048e+08	9.72032e+08	5.8129e+08	5.4337e+08	4.49463e+08	5.5499e+08	5.60448e+08	3.90468e+08	4.14827e+08	3.7143e+08	4.11564e+08	4.08178e+08	4.71662e+08	4.34873e+08	4.751e+08	4.97041e+08	5.12587e+08	5.04188e+08	5.47526e+08	5.43052e+08	5.63885e+08
516	MAC_01092	6.77797	19877000	24604000	28709200	21903100	27884300	26740600	28484700	48771900	27745400	24088600	26753100	28322000	25218300	23178200	20002400	19617100	27364200	23068300	3	3	2.21872e+07	2.19449e+07	2.88365e+07	2.44487e+07	2.48706e+07	2.68592e+07	3.17953e+07	4.35008e+07	2.78684e+07	2.68882e+07	2.38617e+07	2.84476e+07	2.81492e+07	2.06732e+07	2.00911e+07	2.18971e+07	2.44068e+07	2.31706e+07	2.57735e+07	2.3254e+07	2.4614e+07	2.60233e+07	2.51121e+07	2.81488e+07	2.55242e+07	2.43029e+07	2.7034e+07
517	MAC_01093	7.0376	59971400	88806100	46428800	64140100	77277500	26063800	71393100	115950000	25114200	69714200	70403800	37073400	71634300	62623300	27783500	65398000	87106200	31773500	3	6	4.99928e+07	6.03491e+07	8.1959e+07	5.34678e+07	5.25147e+07	4.60094e+07	5.9514e+07	7.8795e+07	4.43332e+07	5.81145e+07	4.78436e+07	6.54443e+07	5.97151e+07	4.25563e+07	4.90452e+07	5.45164e+07	5.91939e+07	5.60886e+07	5.80737e+07	6.39493e+07	6.99577e+07	5.69114e+07	5.30244e+07	4.82185e+07	4.77759e+07	4.40209e+07	4.30057e+07
518	MAC_01095	6.85634	39997500	71919800	64786400	46919000	74936600	60542600	67001900	156788000	66432200	55379900	68498000	70983200	56978900	62179800	54044400	38388100	64119700	53552800	3	9	4.98815e+07	5.70184e+07	6.55255e+07	5.85134e+07	5.94101e+07	6.12333e+07	8.35591e+07	1.24302e+08	6.71901e+07	6.90652e+07	5.43056e+07	7.1793e+07	7.10593e+07	4.92965e+07	5.4661e+07	4.78744e+07	5.08344e+07	5.41638e+07	5.79445e+07	6.042e+07	5.59306e+07	6.22819e+07	5.99868e+07	6.41733e+07	6.70786e+07	6.94448e+07	6.51783e+07
519	MAC_01098	7.53721	162156000	218157000	242438000	178036000	260817000	218671000	261867000	470214000	231325000	217810000	218950000	249015000	224143000	196715000	172589000	140305000	202523000	189057000	3	14	1.82831e+08	1.91386e+08	2.451e+08	2.00736e+08	2.28811e+08	2.21072e+08	2.95255e+08	4.12511e+08	2.33865e+08	2.45581e+08	1.92081e+08	2.51749e+08	2.52722e+08	1.72575e+08	1.74484e+08	1.58194e+08	1.7767e+08	1.91133e+08	2.12384e+08	2.02803e+08	2.0921e+08	2.13664e+08	2.31032e+08	2.31686e+08	2.37022e+08	2.30461e+08	2.26862e+08
520	MAC_01099	7.50825	86310100	125104000	164305000	89405600	118875000	127089000	114796000	184140000	127718000	109804000	106950000	165464000	116713000	86141300	116740000	79383000	99722900	134884000	3	9	1.02356e+08	1.25029e+08	1.3863e+08	1.06027e+08	1.18804e+08	1.0723e+08	1.36138e+08	1.8403e+08	1.0776e+08	1.30218e+08	1.06886e+08	1.39608e+08	1.38412e+08	8.60897e+07	9.84978e+07	9.41414e+07	9.96632e+07	1.13807e+08	1.18901e+08	1.32488e+08	1.1833e+08	1.12856e+08	1.19957e+08	1.12378e+08	1.09287e+08	1.02813e+08	1.04534e+08
521	MAC_01104	6.97678	13696600	15248200	NA	18853900	23369600	NA	27371100	44241500	NA	18393100	17028100	NA	20677600	16680900	NA	13464700	14616300	NA	2	2	1.51179e+07	15248200	NA	2.08103e+07	23369600	NA	3.02113e+07	44241500	NA	2.03017e+07	17028100	NA	2.28233e+07	16680900	NA	1.48619e+07	14616300	NA	1.75615e+07	1.61579e+07	NA	2.21506e+07	2.35964e+07	NA	2.42527e+07	2.47167e+07	NA
522	MAC_01106	7.0143	38546900	48127300	44535100	44278000	53264000	38651800	51461800	83707500	41181100	55435200	50708200	42330200	53677600	41475100	32756000	36423400	46524700	34539700	3	5	3.80361e+07	4.16242e+07	5.21845e+07	4.36913e+07	4.60668e+07	4.52907e+07	5.07799e+07	7.23966e+07	4.82544e+07	5.47007e+07	4.38563e+07	4.96009e+07	5.29664e+07	3.58708e+07	3.83822e+07	3.59408e+07	4.02381e+07	4.04723e+07	4.41844e+07	4.41074e+07	4.45431e+07	4.65052e+07	4.65139e+07	4.74652e+07	4.07645e+07	4.04463e+07	4.68096e+07
523	MAC_01107	7.19588	25974500	56446400	94107300	25359200	59164600	75640600	31514100	104119000	82804000	30929300	53476900	85023600	33855100	47179600	63405700	25266300	51688200	61930100	3	4	4.60194e+07	4.79249e+07	6.25611e+07	4.49293e+07	5.02327e+07	5.02848e+07	5.5834e+07	8.84005e+07	5.50469e+07	5.47979e+07	4.54037e+07	5.65224e+07	5.99816e+07	4.0057e+07	4.21512e+07	4.47647e+07	4.3885e+07	4.11702e+07	5.34581e+07	5.07839e+07	5.34003e+07	4.78229e+07	5.07203e+07	5.26991e+07	4.48218e+07	4.93873e+07	5.33987e+07
524	MAC_01108	8.59095	393091000	553048000	736648000	382696000	525982000	576555000	564296000	1157890000	623959000	470596000	493118000	785117000	493928000	430362000	556447000	317447000	456976000	507787000	3	9	4.87939e+08	5.21308e+08	6.29587e+08	4.75036e+08	4.95796e+08	4.92761e+08	7.00453e+08	1.09144e+09	5.33276e+08	5.84145e+08	4.64818e+08	6.71012e+08	6.13107e+08	4.05663e+08	4.75576e+08	3.94043e+08	4.3075e+08	4.33988e+08	5.6681e+08	5.52408e+08	5.37396e+08	5.0563e+08	5.00608e+08	5.1642e+08	5.62301e+08	6.09762e+08	5.17308e+08
525	MAC_01109	7.05948	32758900	61847700	62138300	36190800	57939600	54193800	68177600	168817000	61920500	39502100	62529200	63425100	36542700	51515000	49895700	26945300	60025200	49088200	3	5	4.55891e+07	4.71074e+07	5.86222e+07	5.03651e+07	4.41308e+07	5.11272e+07	9.48796e+07	1.28583e+08	5.84167e+07	5.49733e+07	4.76265e+07	5.98362e+07	5.08548e+07	3.92373e+07	4.70723e+07	3.74985e+07	4.57193e+07	4.63105e+07	5.29582e+07	4.99178e+07	5.00381e+07	5.36088e+07	4.45591e+07	5.3582e+07	7.61663e+07	7.18361e+07	5.66676e+07
526	MAC_01120	6.58389	26407600	12217000	18947500	29410600	11492400	16992500	42546400	28509500	19195300	34333300	10536200	18593100	34414800	10363600	13438200	25014200	12167500	15957400	3	4	1.61128e+07	1.7772e+07	2.13472e+07	1.7945e+07	1.67179e+07	1.91446e+07	2.59599e+07	4.14725e+07	2.16263e+07	2.09487e+07	1.53269e+07	2.09479e+07	2.09984e+07	1.50758e+07	1.51401e+07	1.52626e+07	1.77e+07	1.79784e+07	1.87172e+07	1.88322e+07	1.82213e+07	1.91008e+07	1.68802e+07	2.00637e+07	2.08398e+07	2.31698e+07	2.09788e+07
527	MAC_01122	7.12724	16387800	18752400	38543000	17720900	22408400	35034100	25905700	44529100	42686200	20608400	18700900	41753900	21932600	16290000	28754400	15253400	18711000	32551600	3	3	2.10331e+07	2.13431e+07	2.63853e+07	2.27441e+07	2.55042e+07	2.39832e+07	3.32489e+07	5.0681e+07	2.92216e+07	2.64501e+07	2.12845e+07	2.85834e+07	2.81496e+07	1.85405e+07	1.96843e+07	1.95771e+07	2.1296e+07	2.22838e+07	2.44329e+07	2.26164e+07	2.25217e+07	2.42089e+07	2.57518e+07	2.51347e+07	2.66912e+07	2.83143e+07	2.83467e+07
528	MAC_01125	7.75126	129812000	209587000	98497700	138705000	165367000	78911400	174777000	282037000	84234500	149119000	139532000	105900000	151413000	124290000	72990400	121307000	142646000	78097200	3	7	1.15834e+08	1.57477e+08	1.4691e+08	1.2377e+08	1.24251e+08	1.17697e+08	1.55957e+08	2.11914e+08	1.25636e+08	1.33062e+08	1.0484e+08	1.57951e+08	1.35109e+08	9.33875e+07	1.08866e+08	1.08245e+08	1.0718e+08	1.16483e+08	1.34558e+08	1.66872e+08	1.25398e+08	1.31741e+08	1.25458e+08	1.23348e+08	1.25198e+08	1.18391e+08	1.21875e+08
529	MAC_01126	7.21717	28759500	73158200	52980100	34282400	88850400	46471600	47863700	156978000	52136600	37767700	75183300	53853100	40032200	71342000	37167400	27623700	80765100	43352500	3	7	4.27727e+07	4.4142e+07	5.90389e+07	5.09867e+07	5.36103e+07	5.17861e+07	7.11856e+07	9.47169e+07	5.8099e+07	5.61702e+07	4.53639e+07	6.00118e+07	5.95381e+07	4.30461e+07	4.14179e+07	4.10835e+07	4.87318e+07	4.83103e+07	4.96866e+07	4.67754e+07	5.03938e+07	5.42704e+07	5.41307e+07	5.42725e+07	5.71455e+07	5.29162e+07	5.63594e+07
530	MAC_01127	6.76178	NA	41752300	8585860	NA	39022600	5853300	NA	83524900	6671260	NA	32127700	7946400	NA	32809000	6011460	NA	40246400	6509060	2	2	NA	41752300	5.30081e+07	NA	39022600	3.61376e+07	NA	8.35249e+07	4.11876e+07	NA	32127700	4.90602e+07	NA	32809000	3.71141e+07	NA	40246400	4.01862e+07	NA	4.42431e+07	4.52461e+07	NA	3.94014e+07	3.78727e+07	NA	4.66634e+07	3.99544e+07
531	MAC_01129	7.09532	22071400	37387300	31660200	23691800	35237700	27873500	34313200	67375700	31470500	27347200	30707000	34369300	26896400	26722500	24163300	20018400	28336200	28908000	3	3	2.60473e+07	3.1323e+07	3.20215e+07	2.79596e+07	2.9522e+07	2.81916e+07	4.04943e+07	5.64472e+07	3.18297e+07	3.22735e+07	2.57262e+07	3.47615e+07	3.17415e+07	2.2388e+07	2.44391e+07	2.36245e+07	2.374e+07	2.92379e+07	3.02576e+07	3.31916e+07	2.73326e+07	2.97603e+07	2.98086e+07	2.95452e+07	3.25075e+07	3.15357e+07	3.08766e+07
532	MAC_01130	8.36734	354014000	367457000	646259000	397579000	410790000	462737000	554306000	707269000	500523000	459537000	360222000	616807000	487716000	316765000	432303000	356623000	366863000	458405000	3	9	3.68938e+08	4.0481e+08	5.62898e+08	4.1434e+08	4.52547e+08	4.03048e+08	5.77674e+08	7.79164e+08	4.3596e+08	4.7891e+08	3.96839e+08	5.37245e+08	5.08276e+08	3.48965e+08	3.7654e+08	3.71657e+08	4.04155e+08	3.99275e+08	4.28574e+08	4.2896e+08	4.80472e+08	4.41025e+08	4.5694e+08	4.22399e+08	4.63738e+08	4.35301e+08	4.22907e+08
533	MAC_01131	6.99795	19376000	39964700	63117900	19182300	38282400	46276500	22511500	56498300	45312000	21156200	32950100	55460700	25371000	31640300	40560500	20380500	33894700	44316600	3	4	3.10335e+07	3.56736e+07	4.41485e+07	3.07233e+07	3.41719e+07	3.23686e+07	3.60555e+07	5.04319e+07	3.1694e+07	3.38848e+07	2.94121e+07	3.87926e+07	4.06354e+07	2.8243e+07	2.83705e+07	3.26424e+07	3.02553e+07	3.09977e+07	3.60498e+07	3.78018e+07	3.76838e+07	3.2702e+07	3.45036e+07	3.39227e+07	2.89442e+07	2.81751e+07	3.0745e+07
534	MAC_01134	7.22942	43432000	69018900	89418900	46983300	74616300	69271500	68219400	149252000	74994300	54358800	65217000	90916300	57047500	59577100	65056900	40836000	70745800	66720300	3	9	5.67851e+07	5.9651e+07	7.91325e+07	6.14283e+07	6.44886e+07	6.13028e+07	8.91934e+07	1.28994e+08	6.63673e+07	7.10714e+07	5.63651e+07	8.04577e+07	7.45867e+07	5.14907e+07	5.7573e+07	5.3391e+07	6.11435e+07	5.90451e+07	6.5964e+07	6.32096e+07	6.75451e+07	6.53845e+07	6.51146e+07	6.42461e+07	7.16016e+07	7.2066e+07	6.43801e+07
535	MAC_01136	7.77562	87396200	152893000	338952000	99362900	137616000	267495000	126556000	206687000	270678000	106720000	119759000	336274000	118879000	106635000	245812000	92690600	121182000	281134000	3	12	1.34349e+08	1.78522e+08	1.88839e+08	1.52745e+08	1.60684e+08	1.49029e+08	1.94547e+08	2.41333e+08	1.50802e+08	1.64054e+08	1.39834e+08	1.87347e+08	1.82746e+08	1.2451e+08	1.36948e+08	1.42488e+08	1.41495e+08	1.56627e+08	1.56066e+08	1.89172e+08	1.61187e+08	1.62582e+08	1.62244e+08	1.56184e+08	1.56176e+08	1.34827e+08	1.46287e+08
536	MAC_01140	6.66483	10667800	21002000	26621700	12074500	20971400	22601700	17510400	44456400	21791900	12610300	18765200	25429400	12494800	15587600	19540100	11356300	20291100	22064600	3	4	1.56803e+07	1.76327e+07	2.15724e+07	1.7748e+07	1.7607e+07	1.83149e+07	2.5738e+07	3.73243e+07	1.76587e+07	1.85355e+07	1.57547e+07	2.06062e+07	1.83657e+07	1.30869e+07	1.5834e+07	1.66923e+07	1.70358e+07	1.78796e+07	1.82149e+07	1.86846e+07	1.84135e+07	1.8891e+07	1.77779e+07	1.91942e+07	2.06617e+07	2.08523e+07	1.71299e+07
537	MAC_01141	7.58954	183712000	291338000	263404000	202715000	304313000	229018000	296075000	652475000	238659000	235886000	275257000	278169000	250645000	247716000	198433000	172141000	258868000	227888000	3	22	2.13285e+08	2.34094e+08	2.82361e+08	2.35347e+08	2.4452e+08	2.45501e+08	3.43736e+08	5.24273e+08	2.55836e+08	2.73858e+08	2.21173e+08	2.98189e+08	2.90993e+08	1.99043e+08	2.12714e+08	1.99852e+08	2.08004e+08	2.44289e+08	2.47761e+08	2.4806e+08	2.41015e+08	2.50505e+08	2.46893e+08	2.57288e+08	2.7594e+08	2.92899e+08	2.48175e+08
538	MAC_01142	6.9663	30481200	37958200	89840300	39874300	45857800	76769500	51364500	73183600	88404200	45016400	37562700	90080900	46386300	35249600	73718800	28388800	37479200	70601500	3	8	3.9979e+07	4.55354e+07	5.70989e+07	5.2299e+07	5.50119e+07	4.87916e+07	6.73695e+07	8.77925e+07	5.61861e+07	5.90433e+07	4.5061e+07	5.72518e+07	6.08401e+07	4.22861e+07	4.68527e+07	3.72346e+07	4.49608e+07	4.48715e+07	4.64413e+07	4.82519e+07	4.87378e+07	5.56672e+07	5.55459e+07	5.11342e+07	5.4082e+07	4.90476e+07	5.45038e+07
539	MAC_01143	6.69619	9753390	17640700	35338800	13161900	17957200	35150200	16163400	38400800	38438500	14638000	16865700	42498000	14627500	13719200	27114400	9367630	14784300	29787000	3	4	1.54486e+07	1.90367e+07	2.06749e+07	2.08474e+07	1.93783e+07	2.05645e+07	2.56015e+07	4.14397e+07	2.24883e+07	2.31854e+07	1.82004e+07	2.48633e+07	2.31688e+07	1.48049e+07	1.58632e+07	1.48376e+07	1.59543e+07	1.74268e+07	1.79457e+07	2.01724e+07	1.76474e+07	2.219e+07	1.95664e+07	2.15519e+07	2.05521e+07	2.31514e+07	2.1815e+07
540	MAC_01145	8.40239	552278000	721085000	1249700000	637623000	784319000	1147390000	979343000	1670820000	1402490000	737175000	682852000	1293070000	731127000	581581000	938626000	482532000	632496000	970282000	3	19	6.99232e+08	7.76259e+08	9.169e+08	8.07286e+08	8.44332e+08	8.41835e+08	1.23993e+09	1.79866e+09	1.029e+09	9.33327e+08	7.35101e+08	9.4872e+08	9.2567e+08	6.26081e+08	6.88666e+08	6.10927e+08	6.80892e+08	7.11892e+08	8.12257e+08	8.22569e+08	7.82638e+08	8.59278e+08	8.52528e+08	8.82254e+08	9.95378e+08	1.00487e+09	9.98191e+08
541	MAC_01149	6.99692	28999200	26553200	85225300	31281000	27488600	68136700	34384200	51286700	91338700	31066900	23462300	73709600	36538500	23492900	62424200	29116300	26298400	56622200	3	4	3.67353e+07	3.74338e+07	4.77225e+07	3.96258e+07	3.87525e+07	3.81536e+07	4.35569e+07	7.23023e+07	5.11457e+07	3.93546e+07	3.30764e+07	4.12742e+07	4.62859e+07	3.31195e+07	3.49549e+07	3.68836e+07	3.70746e+07	3.1706e+07	4.26733e+07	3.96671e+07	4.07345e+07	4.21779e+07	3.91287e+07	3.99855e+07	3.4966e+07	4.03937e+07	4.96143e+07
542	MAC_01151	6.94117	47880400	121347000	123399000	54897500	147126000	122147000	83451800	295215000	137035000	63907300	134673000	129789000	64561700	115024000	98696000	45931000	126797000	106414000	3	16	8.2223e+07	8.30785e+07	1.04958e+08	9.42732e+07	1.00728e+08	1.03893e+08	1.43308e+08	2.02115e+08	1.16556e+08	1.09745e+08	9.22019e+07	1.10393e+08	1.10869e+08	7.87495e+07	8.39469e+07	7.88754e+07	8.68097e+07	9.05115e+07	9.55137e+07	8.80347e+07	8.95891e+07	1.00345e+08	1.01705e+08	1.08882e+08	1.15043e+08	1.12917e+08	1.13067e+08
543	MAC_01153	7.32294	60535200	69322600	171510000	64925100	88770900	142682000	108590000	188317000	166423000	76969700	77892000	165041000	84114900	70258900	121237000	54184400	76375500	132645000	3	11	8.19571e+07	7.71737e+07	1.13793e+08	8.79005e+07	9.88246e+07	9.46664e+07	1.47017e+08	2.09645e+08	1.10418e+08	1.04207e+08	8.67136e+07	1.09501e+08	1.13881e+08	7.8216e+07	8.04381e+07	7.33589e+07	8.50254e+07	8.80071e+07	9.52048e+07	8.17777e+07	9.71303e+07	9.35616e+07	9.97839e+07	9.92116e+07	1.18021e+08	1.17124e+08	1.07112e+08
544	MAC_01154	6.62508	30358300	13173400	7723150	33509500	15923500	6072920	39314400	23200800	6116990	39030200	14215300	7535680	39850400	13419900	5614660	26351300	13550300	5314370	3	4	1.31843e+07	1.28816e+07	1.81862e+07	1.45529e+07	1.55707e+07	1.43003e+07	1.70739e+07	2.26868e+07	1.44041e+07	1.69505e+07	1.39004e+07	1.77448e+07	1.73067e+07	1.31226e+07	1.32212e+07	1.14441e+07	1.32501e+07	1.25141e+07	1.53155e+07	1.365e+07	1.55232e+07	1.54901e+07	1.57219e+07	1.49869e+07	1.37064e+07	1.26746e+07	1.39728e+07
545	MAC_01157	7.19434	64486600	96938700	106869000	69291900	97901700	85843300	88385900	166071000	86718600	83406100	84607400	106992000	81526700	73914600	75504100	60017800	86467600	81670000	3	6	7.55329e+07	8.60242e+07	1.02816e+08	8.11614e+07	8.68788e+07	8.25879e+07	1.03526e+08	1.47373e+08	8.343e+07	9.76933e+07	7.50813e+07	1.02935e+08	9.54919e+07	6.55924e+07	7.26408e+07	7.02986e+07	7.6732e+07	7.85728e+07	8.77422e+07	9.11562e+07	8.77607e+07	8.63884e+07	8.77221e+07	8.65531e+07	8.31074e+07	8.23338e+07	8.09319e+07
546	MAC_01160	8.42784	304615000	594512000	658733000	319835000	467720000	529306000	448323000	923041000	605140000	386084000	409230000	652888000	369103000	354408000	495941000	244165000	392946000	523129000	3	20	4.11691e+08	5.50912e+08	5.25978e+08	4.32261e+08	4.33419e+08	4.22635e+08	6.05914e+08	8.55347e+08	4.83186e+08	5.21797e+08	3.79218e+08	5.21311e+08	4.98847e+08	3.28417e+08	3.95994e+08	3.29992e+08	3.64128e+08	4.17703e+08	4.78237e+08	5.83778e+08	4.48959e+08	4.601e+08	4.37626e+08	4.42927e+08	4.86408e+08	4.77863e+08	4.68718e+08
547	MAC_01161	7.84167	159259000	207452000	220693000	168977000	199260000	159814000	207025000	380669000	177098000	180892000	193193000	203843000	210790000	186960000	154400000	140710000	196024000	151539000	3	11	1.71304e+08	1.79205e+08	2.37517e+08	1.81756e+08	1.72128e+08	1.71997e+08	2.22682e+08	3.28836e+08	1.90599e+08	1.94573e+08	1.66887e+08	2.19383e+08	2.26732e+08	1.61503e+08	1.6617e+08	1.51352e+08	1.69333e+08	1.63091e+08	1.98993e+08	1.89895e+08	2.02737e+08	1.93462e+08	1.73799e+08	1.80255e+08	1.78762e+08	1.83713e+08	1.84892e+08
548	MAC_01162	7.18669	44963400	37636400	119100000	49608100	38730900	101443000	56126600	64156200	105481000	54576300	33316500	114457000	53873400	30473600	86580600	43513700	37250300	98391000	3	6	5.26505e+07	5.66864e+07	6.75302e+07	5.80892e+07	5.83349e+07	5.75186e+07	6.57221e+07	9.66295e+07	5.98081e+07	6.39068e+07	5.018e+07	6.48976e+07	6.30837e+07	4.58981e+07	4.90915e+07	5.09529e+07	5.61049e+07	5.57881e+07	6.1161e+07	6.00682e+07	5.76417e+07	6.18304e+07	5.89012e+07	6.02802e+07	5.27596e+07	5.39847e+07	5.80174e+07
549	MAC_01163	7.65992	127708000	252476000	305557000	139766000	267043000	243397000	177799000	459835000	242779000	160633000	234459000	298314000	172010000	206623000	213394000	118760000	221626000	240628000	3	18	1.85752e+08	2.06138e+08	2.57299e+08	2.0329e+08	2.18032e+08	2.04956e+08	2.5861e+08	3.7544e+08	2.04436e+08	2.33642e+08	1.91428e+08	2.512e+08	2.50189e+08	1.68701e+08	1.79692e+08	1.72737e+08	1.8095e+08	2.02625e+08	2.15777e+08	2.18436e+08	2.19623e+08	2.16383e+08	2.20148e+08	2.14797e+08	2.07603e+08	2.0975e+08	1.98315e+08
550	MAC_01165	8.39201	431472000	557765000	651218000	413027000	557989000	595413000	586756000	950422000	675122000	543480000	488820000	721149000	536382000	393043000	478561000	377609000	412399000	664961000	3	11	4.92012e+08	5.64944e+08	5.63832e+08	4.70979e+08	5.65171e+08	5.15515e+08	6.69083e+08	9.62655e+08	5.84528e+08	6.19735e+08	4.95112e+08	6.24379e+08	6.11641e+08	3.98102e+08	4.14343e+08	4.30591e+08	4.17707e+08	5.75731e+08	5.71541e+08	5.98647e+08	4.8127e+08	5.01311e+08	5.70657e+08	5.40266e+08	5.37118e+08	5.37813e+08	5.67026e+08
551	MAC_01166	7.86142	64282600	143689000	164721000	68762200	154584000	131055000	79170800	255528000	134807000	82228900	133864000	156403000	85330300	122943000	110905000	59923700	134905000	129857000	3	9	1.01641e+08	1.08214e+08	1.3833e+08	1.08724e+08	1.16419e+08	1.10058e+08	1.25181e+08	1.92441e+08	1.13209e+08	1.30016e+08	1.00815e+08	1.31345e+08	1.3492e+08	9.25898e+07	9.31361e+07	9.47485e+07	1.01599e+08	1.09052e+08	1.1807e+08	1.1467e+08	1.18074e+08	1.15726e+08	1.17549e+08	1.15342e+08	1.00491e+08	1.07512e+08	1.09819e+08
552	MAC_01168	6.59886	12148300	27581100	NA	16167700	34217200	NA	22151600	62891500	NA	17931100	30720000	NA	18877600	24370000	NA	13464000	28918900	NA	2	4	2.43473e+07	27581100	NA	3.24029e+07	34217200	NA	4.43956e+07	6.28915e+07	NA	3.5937e+07	30720000	NA	3.7834e+07	24370000	NA	2.69842e+07	28918900	NA	2.82828e+07	2.92265e+07	NA	3.44897e+07	3.45493e+07	NA	3.56394e+07	3.5136e+07	NA
553	MAC_01170	7.05525	42256300	58773600	19514500	48185900	66526100	18974800	61037600	104475000	16998700	55486000	56643200	19767100	60497400	46584400	16123600	40257400	54573900	17322600	3	5	3.21375e+07	3.62721e+07	4.15763e+07	3.66472e+07	4.10565e+07	4.04265e+07	4.64214e+07	6.44767e+07	3.62163e+07	4.21992e+07	3.49573e+07	4.21145e+07	4.60106e+07	2.87495e+07	3.43519e+07	3.06173e+07	3.36802e+07	3.69064e+07	3.73323e+07	3.8436e+07	3.54883e+07	3.90074e+07	4.14551e+07	4.23675e+07	3.72656e+07	3.60216e+07	3.51319e+07
554	MAC_01173	6.72119	27526300	19836700	NA	30639900	22983300	NA	38909700	42506200	NA	32819900	22899800	NA	39515300	22001100	NA	25684500	20712700	NA	2	5	2.07784e+07	19836700	NA	2.31287e+07	22983300	NA	2.93712e+07	42506200	NA	2.47743e+07	22899800	NA	2.98283e+07	22001100	NA	1.93881e+07	20712700	NA	2.4137e+07	2.10201e+07	NA	2.46182e+07	2.32064e+07	NA	2.35782e+07	2.37472e+07	NA
555	MAC_01176	7.82854	153928000	208456000	237051000	170301000	177317000	214410000	235523000	365184000	230414000	191328000	159947000	265813000	184833000	134845000	192214000	135320000	145015000	226495000	3	12	1.70876e+08	2.18043e+08	2.04151e+08	1.89052e+08	1.85472e+08	1.84652e+08	2.61455e+08	3.81979e+08	1.98435e+08	2.12394e+08	1.67303e+08	2.28921e+08	2.05184e+08	1.41047e+08	1.65536e+08	1.50219e+08	1.51684e+08	1.9506e+08	1.98497e+08	2.31051e+08	1.74257e+08	2.01227e+08	1.87272e+08	1.93517e+08	2.09887e+08	2.13403e+08	1.92493e+08
556	MAC_01179	7.13116	23934000	72668000	49072200	20391200	54597700	33764200	22843200	84221500	34344400	26692400	45253100	49323900	28308200	40748900	31674600	20103200	41227800	32377700	3	5	3.70054e+07	4.87424e+07	4.73175e+07	3.15277e+07	3.66217e+07	3.25569e+07	3.53189e+07	5.6492e+07	3.31163e+07	4.12703e+07	3.03538e+07	4.75602e+07	4.37685e+07	2.73325e+07	3.0542e+07	3.10824e+07	2.76538e+07	3.12199e+07	4.2987e+07	5.16503e+07	4.03887e+07	3.35582e+07	3.69772e+07	3.412e+07	2.83528e+07	3.15608e+07	3.21247e+07
557	MAC_01181	6.36256	NA	5736670	8200860	NA	5086420	10428600	NA	19880500	15163700	NA	6680650	11757800	NA	4340180	7616110	NA	4111390	4787910	2	3	NA	5.73667e+06	5.79401e+06	NA	5086420	7.36794e+06	NA	19880500	1.07133e+07	NA	6.68065e+06	8.30703e+06	NA	4340180	5.38088e+06	NA	4111390	3.38272e+06	NA	6.07891e+06	4.94559e+06	NA	5.13579e+06	7.72169e+06	NA	1.11068e+07	1.03926e+07
558	MAC_01186	7.10477	17367400	24358200	37865100	20330700	16317700	45158500	44811200	119726000	114628000	25324900	31189400	69419700	21475900	19055700	57052500	15380700	18387500	27184500	3	5	2.48381e+07	2.77318e+07	2.32553e+07	2.90761e+07	1.85777e+07	2.77347e+07	6.4087e+07	1.36308e+08	7.04002e+07	3.62185e+07	3.55092e+07	4.2635e+07	3.07139e+07	2.16949e+07	3.50395e+07	2.19968e+07	2.09342e+07	1.66957e+07	2.88529e+07	2.93863e+07	1.985e+07	3.09487e+07	1.8758e+07	2.90663e+07	5.1447e+07	7.61522e+07	6.82923e+07
559	MAC_01188	7.12986	44085700	55142500	36801400	42435700	65991200	28729400	52775600	114051000	31446300	47898700	56588100	32829900	55438700	55667500	24603500	37154600	61562500	24240200	3	3	4.26548e+07	3.75237e+07	5.58953e+07	4.10583e+07	4.49061e+07	4.36353e+07	5.10626e+07	7.76101e+07	4.77618e+07	4.6344e+07	3.85074e+07	4.98633e+07	5.36393e+07	3.7881e+07	3.73687e+07	3.59486e+07	4.18924e+07	3.68169e+07	4.95495e+07	3.97623e+07	4.77105e+07	4.37026e+07	4.5342e+07	4.57303e+07	4.09914e+07	4.3359e+07	4.63317e+07
560	MAC_01191	6.60447	15319800	15056200	23844000	13198000	14360200	19915100	18861000	30452400	24247700	15541000	15327900	22589400	18789500	13652200	18201800	11808000	14734900	15847900	3	3	1.72882e+07	1.58043e+07	2.0129e+07	1.48938e+07	1.50737e+07	1.68123e+07	2.12845e+07	3.19654e+07	2.04698e+07	1.75379e+07	1.60895e+07	1.90699e+07	2.12038e+07	1.43305e+07	1.53659e+07	1.33252e+07	1.5467e+07	1.33787e+07	2.00827e+07	1.67471e+07	1.71815e+07	1.5853e+07	1.522e+07	1.76194e+07	1.70865e+07	1.78583e+07	1.98569e+07
561	MAC_01195	6.55786	10177600	40556500	20330200	11802900	31155300	17534500	11325300	50355200	12997500	10494400	24953300	19729000	13261100	27425100	17069700	10400200	29491000	16852100	3	3	1.68474e+07	2.27977e+07	2.18487e+07	1.95378e+07	1.75131e+07	1.88442e+07	1.87472e+07	2.83057e+07	1.39683e+07	1.73718e+07	1.40268e+07	2.12026e+07	2.19516e+07	1.54162e+07	1.83447e+07	1.72158e+07	1.65775e+07	1.81108e+07	1.95706e+07	2.41577e+07	1.86494e+07	2.07961e+07	1.7683e+07	1.97489e+07	1.50496e+07	1.58138e+07	1.35501e+07
562	MAC_01199	6.32216	7024370	NA	10169300	7008250	NA	8980450	11782600	NA	10909100	9282110	NA	9896820	9553700	NA	7798430	6239910	NA	7996430	2	2	7.41539e+06	NA	9.63306e+06	7.39838e+06	NA	8.5069e+06	1.24385e+07	NA	1.03338e+07	9.79882e+06	NA	9.37495e+06	1.00855e+07	NA	7.38721e+06	6.58727e+06	NA	7.57477e+06	8.61403e+06	NA	8.22248e+06	7.87486e+06	NA	8.91533e+06	9.98523e+06	NA	1.00244e+07
563	MAC_01200	8.89004	832323000	2053520000	2131610000	921805000	2048670000	1589310000	1276650000	3870590000	1810980000	1002810000	1800340000	2041350000	1077220000	1540280000	1449040000	833400000	1820320000	1735590000	3	19	1.30611e+09	1.51336e+09	1.84323e+09	1.44653e+09	1.50978e+09	1.37429e+09	2.00336e+09	2.85246e+09	1.56597e+09	1.57364e+09	1.32677e+09	1.76518e+09	1.69041e+09	1.13512e+09	1.253e+09	1.3078e+09	1.3415e+09	1.50078e+09	1.51723e+09	1.60364e+09	1.57332e+09	1.53969e+09	1.52444e+09	1.44028e+09	1.60823e+09	1.5936e+09	1.51909e+09
564	MAC_01201	8.10672	403991000	562984000	986420000	450480000	606938000	797302000	602613000	1187740000	893669000	512191000	542238000	895041000	553584000	497765000	653231000	389325000	520422000	678618000	3	41	5.24136e+08	5.64177e+08	7.587e+08	5.84451e+08	6.08224e+08	6.13241e+08	7.81827e+08	1.19026e+09	6.87361e+08	6.64514e+08	5.43387e+08	6.88417e+08	7.18217e+08	4.9882e+08	5.0243e+08	5.05108e+08	5.21525e+08	5.21956e+08	6.08858e+08	5.97834e+08	6.47603e+08	6.22091e+08	6.14128e+08	6.42684e+08	6.27626e+08	6.64969e+08	6.6678e+08
565	MAC_01209	7.1184	44790400	100985000	63757800	56173800	117055000	60548000	72412800	218841000	63131200	61036100	104260000	62280800	64490500	91848600	48878800	42282200	97409500	47544700	3	9	5.76015e+07	6.26191e+07	7.99531e+07	7.22408e+07	7.25838e+07	7.59279e+07	9.31245e+07	1.357e+08	7.91673e+07	7.84938e+07	6.46498e+07	7.81009e+07	8.29362e+07	5.69537e+07	6.12946e+07	5.43759e+07	6.0402e+07	5.96216e+07	6.69122e+07	6.63548e+07	6.82455e+07	7.68933e+07	7.32883e+07	7.95734e+07	7.47573e+07	7.58122e+07	7.67969e+07
566	MAC_01210	7.23313	64819300	86688100	127725000	74876200	99535400	110609000	100471000	177917000	123111000	84098500	82565500	131033000	87740200	73450700	90593000	64748900	83666400	99845700	3	11	7.82401e+07	8.55696e+07	1.07199e+08	9.03793e+07	9.82511e+07	9.28337e+07	1.21273e+08	1.75621e+08	1.03327e+08	1.01511e+08	8.15001e+07	1.09975e+08	1.05907e+08	7.2503e+07	7.60343e+07	7.81551e+07	8.25868e+07	8.38001e+07	9.0887e+07	9.06744e+07	9.15018e+07	9.62e+07	9.92048e+07	9.72909e+07	9.73544e+07	9.81156e+07	1.00233e+08
567	MAC_01220	7.15359	41124000	53366500	84582700	59831400	52739700	105841000	130439000	165430000	183784000	71476000	54336700	136193000	64923900	45410200	111406000	38919100	42929600	79684300	3	11	4.96027e+07	6.61254e+07	5.65942e+07	7.21671e+07	6.53487e+07	7.08181e+07	1.57332e+08	2.04981e+08	1.2297e+08	8.62125e+07	6.73275e+07	9.11266e+07	7.83096e+07	5.62669e+07	7.45416e+07	4.69432e+07	5.31932e+07	5.33167e+07	5.76206e+07	7.00703e+07	4.83071e+07	7.6815e+07	6.5983e+07	7.42182e+07	1.26301e+08	1.14518e+08	1.19288e+08
568	MAC_01226	8.04133	353965000	487773000	513144000	499262000	574565000	438363000	678500000	1473250000	584100000	472129000	582826000	494489000	591437000	535123000	394928000	387714000	485605000	314777000	3	30	3.76222e+08	3.98936e+08	5.90296e+08	5.30655e+08	4.69921e+08	5.04272e+08	7.21163e+08	1.20493e+09	6.71921e+08	5.01816e+08	4.76677e+08	5.68836e+08	6.28626e+08	4.37662e+08	4.54306e+08	4.12093e+08	3.97163e+08	3.62104e+08	4.37035e+08	4.22736e+08	5.03859e+08	5.64831e+08	4.74482e+08	5.28483e+08	5.78927e+08	6.73167e+08	6.51802e+08
569	MAC_01235	6.64635	14288100	34682700	NA	16058300	27880700	NA	22011100	55153000	NA	17263600	30779000	NA	16634900	22348400	NA	14086000	26748900	NA	2	4	2.72415e+07	34682700	NA	3.06165e+07	27880700	NA	4.1966e+07	5.5153e+07	NA	3.29145e+07	30779000	NA	3.17159e+07	22348400	NA	2.68562e+07	26748900	NA	3.16448e+07	3.67518e+07	NA	3.25883e+07	2.81513e+07	NA	3.3689e+07	3.08127e+07	NA
570	MAC_01250	6.67291	24295700	15964800	33403600	24584800	16433500	23832100	30385100	33040000	28631600	29056800	15903900	29251000	32467800	13977800	21407800	24469000	17023800	23644700	3	3	2.08379e+07	2.09344e+07	2.9701e+07	2.10858e+07	2.1549e+07	2.11905e+07	2.60606e+07	4.33249e+07	2.5458e+07	2.49214e+07	2.08546e+07	2.60087e+07	2.78469e+07	1.83289e+07	1.90349e+07	2.09865e+07	2.23231e+07	2.10238e+07	2.42061e+07	2.21833e+07	2.53519e+07	2.24438e+07	2.17582e+07	2.22079e+07	2.09206e+07	2.42046e+07	2.46957e+07
571	MAC_01251	7.06979	35129800	41243100	NA	38820500	43132800	NA	43912600	60537300	NA	44266500	35187200	NA	47724300	32196300	NA	32512900	34062600	NA	2	2	3.51899e+07	41243100	NA	3.88869e+07	43132800	NA	4.39877e+07	60537300	NA	4.43422e+07	35187200	NA	4.78059e+07	32196300	NA	3.25685e+07	34062600	NA	4.08781e+07	4.37036e+07	NA	4.13914e+07	4.35515e+07	NA	3.53119e+07	3.38208e+07	NA
572	MAC_01252	7.42746	NA	86005600	162025000	NA	92632400	106158000	NA	156396000	98072500	NA	78342600	156499000	NA	67694000	113636000	NA	77679200	93011300	2	8	NA	8.60056e+07	1.2219e+08	NA	9.26324e+07	8.00583e+07	NA	156396000	7.39607e+07	NA	7.83426e+07	1.18023e+08	NA	67694000	8.56978e+07	NA	77679200	7.01438e+07	NA	9.11365e+07	1.04298e+08	NA	9.35316e+07	8.39021e+07	NA	8.73748e+07	7.17462e+07
573	MAC_01256	7.79129	240920000	251438000	386096000	254473000	262312000	295593000	313922000	445266000	315754000	301760000	237591000	382831000	306763000	208478000	268995000	211123000	239784000	295141000	3	18	2.5459e+08	2.69066e+08	3.41428e+08	2.68912e+08	2.80702e+08	2.61396e+08	3.31734e+08	4.76483e+08	2.79224e+08	3.18882e+08	2.54248e+08	3.38541e+08	3.24169e+08	2.23094e+08	2.37875e+08	2.23102e+08	2.56595e+08	2.60996e+08	2.95742e+08	2.85118e+08	2.91433e+08	2.86231e+08	2.83427e+08	2.73946e+08	2.66305e+08	2.662e+08	2.70864e+08
574	MAC_01257	8.06808	466938000	610680000	926358000	489359000	702766000	773720000	635260000	1126160000	787913000	577438000	548576000	931869000	602371000	469515000	659535000	432184000	563365000	731048000	3	22	5.70981e+08	6.14713e+08	7.52589e+08	5.98398e+08	7.07407e+08	6.28583e+08	7.76809e+08	1.1336e+09	6.40114e+08	7.06103e+08	5.52199e+08	7.57066e+08	7.36591e+08	4.72616e+08	5.35817e+08	5.28483e+08	5.67085e+08	5.93916e+08	6.63276e+08	6.51385e+08	6.42386e+08	6.36937e+08	7.14274e+08	6.58763e+08	6.23597e+08	6.33315e+08	6.20947e+08
575	MAC_01258	7.22283	107809000	109789000	58614900	105070000	112753000	40715500	137509000	173118000	41074400	128823000	99198500	59893600	139554000	80261800	37811400	96145200	81545200	42457700	3	4	7.5909e+07	8.62935e+07	1.05913e+08	7.39804e+07	8.86232e+07	7.35703e+07	9.68209e+07	1.3607e+08	7.42188e+07	9.0705e+07	7.79694e+07	1.08224e+08	9.82608e+07	6.30853e+07	6.83228e+07	6.76964e+07	6.4094e+07	7.67184e+07	8.8179e+07	9.14415e+07	9.04044e+07	7.8745e+07	8.94834e+07	7.71026e+07	7.77247e+07	7.6019e+07	7.19966e+07
576	MAC_01259	7.16346	56973500	103046000	163860000	64616300	119106000	137823000	92354600	223526000	153599000	75470800	109617000	161364000	75714500	90768300	118314000	52809200	104040000	120238000	3	14	8.72547e+07	9.07375e+07	1.21507e+08	9.89597e+07	1.04879e+08	1.022e+08	1.41441e+08	1.96826e+08	1.13898e+08	1.15583e+08	9.65236e+07	1.19656e+08	1.15957e+08	7.99263e+07	8.77333e+07	8.08771e+07	9.16127e+07	8.916e+07	1.01359e+08	9.61506e+07	1.03715e+08	1.05333e+08	1.05897e+08	1.07107e+08	1.13544e+08	1.09962e+08	1.10488e+08
577	MAC_01268	6.51851	21219600	43414200	14986200	22629300	41591800	9933730	24246300	78339600	11548200	21613100	44032600	11410900	28544300	44340300	9211380	23566100	47439400	9491570	3	6	2.09351e+07	2.0748e+07	3.1784e+07	2.23259e+07	1.98771e+07	2.10683e+07	2.39212e+07	3.74392e+07	2.44924e+07	2.13233e+07	2.10436e+07	2.42012e+07	2.81616e+07	2.11906e+07	1.95363e+07	2.32501e+07	2.26717e+07	2.01305e+07	2.43191e+07	2.19858e+07	2.71299e+07	2.37638e+07	2.007e+07	2.20798e+07	1.92032e+07	2.09164e+07	2.37591e+07
578	MAC_01270	6.55735	13941000	23539300	NA	12996600	18706600	NA	11956900	28147500	NA	15841600	17925600	NA	17322600	16690000	NA	14568600	20369000	NA	2	3	2.00011e+07	23539300	NA	1.86461e+07	18706600	NA	1.71545e+07	28147500	NA	2.27278e+07	17925600	NA	2.48526e+07	16690000	NA	2.09015e+07	20369000	NA	2.32341e+07	2.49436e+07	NA	1.9847e+07	1.88882e+07	NA	1.37711e+07	1.57254e+07	NA
579	MAC_01271	7.07559	34768200	62132600	28922900	37050900	58616500	25427700	48803100	107765000	26253600	43908200	52965100	30785300	45879700	45810700	21814700	32059700	52440800	26652700	3	7	3.48568e+07	4.09994e+07	4.37198e+07	3.71454e+07	3.86792e+07	3.84365e+07	4.89275e+07	7.11108e+07	3.96849e+07	4.40202e+07	3.495e+07	4.6535e+07	4.59967e+07	3.02291e+07	3.29751e+07	3.21414e+07	3.46041e+07	4.02882e+07	4.04912e+07	4.34453e+07	3.73179e+07	3.95377e+07	3.90547e+07	4.02819e+07	3.92774e+07	3.9728e+07	3.84966e+07
580	MAC_01272	7.36788	NA	46961100	72415800	NA	47333200	56879200	NA	68157000	56475100	NA	42031100	71145100	NA	37852200	50187600	NA	42849400	52253400	2	5	NA	46961100	5.7006e+07	NA	47333200	4.47755e+07	NA	68157000	4.44574e+07	NA	42031100	5.60057e+07	NA	37852200	3.95078e+07	NA	42849400	4.1134e+07	NA	4.97627e+07	4.86585e+07	NA	4.77927e+07	4.69253e+07	NA	3.80777e+07	4.31262e+07
581	MAC_01273	6.31351	NA	16361700	7760010	NA	17329200	5781140	NA	27111100	5912170	NA	15584300	7345780	NA	13466100	5706620	NA	17565000	6053250	2	2	NA	16361700	2.12445e+07	NA	17329200	1.5827e+07	NA	27111100	1.61857e+07	NA	15584300	2.01104e+07	NA	13466100	1.56229e+07	NA	17565000	1.65719e+07	NA	1.73378e+07	1.81336e+07	NA	1.74974e+07	1.65868e+07	NA	1.51463e+07	1.5701e+07
582	MAC_01282	6.8311	NA	22484500	15192100	NA	27767800	14706500	NA	53567400	16867100	NA	23139800	16642800	NA	16172000	11065900	NA	19643500	13586300	2	5	NA	22484500	2.61607e+07	NA	27767800	2.53245e+07	NA	53567400	2.9045e+07	NA	23139800	2.86588e+07	NA	16172000	1.90554e+07	NA	19643500	2.33955e+07	NA	2.38259e+07	2.23299e+07	NA	2.80373e+07	2.65404e+07	NA	2.99269e+07	2.81753e+07
583	MAC_01283	7.62344	98784500	195536000	278370000	114525000	213414000	261386000	173470000	465759000	289784000	133433000	190069000	297898000	132866000	170394000	208066000	92542500	179373000	212948000	3	13	1.54209e+08	1.68719e+08	2.06663e+08	1.78781e+08	1.84145e+08	1.94054e+08	2.70798e+08	4.01883e+08	2.15137e+08	2.08298e+08	1.64002e+08	2.21161e+08	2.07413e+08	1.47025e+08	1.54469e+08	1.44465e+08	1.54773e+08	1.58093e+08	1.79136e+08	1.78785e+08	1.76401e+08	1.90295e+08	1.85933e+08	2.03371e+08	2.17388e+08	2.24523e+08	2.08695e+08
584	MAC_01286	7.64137	99023500	190531000	282195000	111326000	193466000	223443000	136772000	312175000	214685000	120706000	161044000	256314000	130845000	155745000	180628000	97444000	189397000	206308000	3	8	1.4756e+08	1.6769e+08	2.15167e+08	1.65893e+08	1.70274e+08	1.7037e+08	2.03811e+08	2.74752e+08	1.63693e+08	1.7987e+08	1.41738e+08	1.95434e+08	1.94979e+08	1.37074e+08	1.37725e+08	1.45206e+08	1.66692e+08	1.57305e+08	1.71412e+08	1.77694e+08	1.8366e+08	1.76577e+08	1.71926e+08	1.7855e+08	1.63613e+08	1.53498e+08	1.58791e+08
585	MAC_01287	7.42616	82582600	110732000	179813000	90603200	117353000	134207000	116452000	190127000	127478000	110310000	97388300	159958000	112699000	86949900	119666000	76473900	87332200	132562000	3	11	9.77453e+07	1.14875e+08	1.46441e+08	1.07239e+08	1.21744e+08	1.09299e+08	1.37833e+08	1.9724e+08	1.03819e+08	1.30564e+08	1.01032e+08	1.30271e+08	1.33391e+08	9.0203e+07	9.74567e+07	9.0515e+07	9.05996e+07	1.07959e+08	1.13545e+08	1.21728e+08	1.24997e+08	1.14145e+08	1.22925e+08	1.14547e+08	1.10648e+08	1.10194e+08	1.0071e+08
586	MAC_01291	7.09706	50245200	72679300	91839200	60843700	93934800	79822500	94172000	182762000	94220300	68281700	82560300	89530100	67575000	62322100	61750800	52201900	76381300	73045700	3	8	6.05164e+07	6.31834e+07	8.77116e+07	7.32814e+07	8.16618e+07	7.6235e+07	1.13423e+08	1.58883e+08	8.99857e+07	8.22399e+07	7.17734e+07	8.55063e+07	8.13888e+07	5.41795e+07	5.89755e+07	6.28731e+07	6.64018e+07	6.97628e+07	7.02984e+07	6.69528e+07	7.48679e+07	7.8001e+07	8.24545e+07	7.98952e+07	9.10521e+07	8.87645e+07	8.72914e+07
587	MAC_01292	6.97726	42237400	30451800	42620600	44882200	31071900	33671200	50132700	42710300	32958600	51954400	25924700	44190400	57391300	24158000	31092000	40368500	24255800	34454800	3	6	3.27924e+07	3.84951e+07	4.34261e+07	3.48458e+07	3.9279e+07	3.43076e+07	3.89222e+07	5.39915e+07	3.35815e+07	4.03365e+07	3.27723e+07	4.50256e+07	4.45576e+07	3.05389e+07	3.16796e+07	3.13414e+07	3.06626e+07	3.5106e+07	3.8093e+07	4.07916e+07	3.70672e+07	3.709e+07	3.96603e+07	3.59547e+07	3.12455e+07	3.01638e+07	3.2576e+07
588	MAC_01293	6.9106	38999000	37642600	39187200	37680200	33202000	37383400	38098000	42985800	34137600	42673800	30925000	40725600	47415300	28495200	31295700	35006200	27239400	38847800	3	5	3.56935e+07	4.15454e+07	3.87941e+07	3.44864e+07	3.66444e+07	3.70084e+07	3.48688e+07	4.74425e+07	3.37952e+07	3.90568e+07	3.41313e+07	4.03171e+07	4.33964e+07	3.14496e+07	3.09818e+07	3.20391e+07	3.00636e+07	3.84581e+07	4.1463e+07	4.40239e+07	3.31135e+07	3.67075e+07	3.70001e+07	3.87853e+07	2.79916e+07	2.65051e+07	3.27833e+07
589	MAC_01298	6.6582	44952200	28705100	29767300	39562700	26733500	24156000	34433400	37312800	20909700	45470800	25160300	29893700	53152100	23009100	21061500	39496100	25278300	25213400	3	4	3.25084e+07	3.22083e+07	3.66848e+07	2.86108e+07	2.99961e+07	2.97695e+07	2.49014e+07	4.18665e+07	2.57688e+07	3.28834e+07	2.82309e+07	3.68405e+07	3.84384e+07	2.58172e+07	2.59559e+07	2.85627e+07	2.83633e+07	3.10726e+07	3.77631e+07	3.41298e+07	3.1313e+07	3.04535e+07	3.02873e+07	3.11988e+07	1.99901e+07	2.33899e+07	2.49972e+07
590	MAC_01300	7.9579	260440000	358378000	406959000	300054000	421417000	353680000	412377000	683194000	387614000	361052000	336204000	390430000	372100000	303075000	277876000	244670000	320805000	311989000	3	9	2.86814e+08	3.2539e+08	4.07001e+08	3.30439e+08	3.82626e+08	3.53717e+08	4.54137e+08	6.20307e+08	3.87654e+08	3.97614e+08	3.05257e+08	3.90471e+08	4.09781e+08	2.75177e+08	2.77905e+08	2.69447e+08	2.91275e+08	3.12022e+08	3.33175e+08	3.44802e+08	3.47404e+08	3.51721e+08	3.8634e+08	3.707e+08	3.64566e+08	3.46551e+08	3.76047e+08
591	MAC_01301	6.93511	18094300	70061300	40704000	18519100	59467200	34015700	20214100	92873500	39823000	24152500	52607500	43873100	23187900	45366000	29217000	14648900	41893400	34511500	3	3	3.21156e+07	4.177e+07	3.8466e+07	3.28696e+07	3.54539e+07	3.21454e+07	3.5878e+07	5.53704e+07	3.76334e+07	4.28683e+07	3.13642e+07	4.14609e+07	4.11562e+07	2.70468e+07	2.76106e+07	2.60003e+07	2.49765e+07	3.2614e+07	3.73068e+07	4.42619e+07	3.28334e+07	3.49865e+07	3.5798e+07	3.36888e+07	2.88017e+07	3.09342e+07	3.65066e+07
592	MAC_01304	7.37085	27968200	51863600	83423800	35743600	72888000	73425400	49779800	123229000	90961700	39977300	55661300	79581300	46083400	52678900	65539100	25595800	49379800	56038500	3	5	4.26571e+07	4.51961e+07	6.27661e+07	5.45161e+07	6.35177e+07	5.52435e+07	7.59241e+07	1.07387e+08	6.84374e+07	6.09733e+07	4.85056e+07	5.98751e+07	7.02864e+07	4.59066e+07	4.931e+07	3.90387e+07	4.30316e+07	4.2162e+07	4.95522e+07	4.78924e+07	5.35752e+07	5.80272e+07	6.41342e+07	5.78959e+07	6.09494e+07	5.99946e+07	6.63882e+07
593	MAC_01305	6.76044	13446200	27598300	58438900	13869600	33269000	46499300	20804600	73222000	54044000	14988800	30001900	52573200	16679400	28128300	37568000	13196400	29728600	40621800	3	6	2.57652e+07	2.34431e+07	3.59033e+07	2.65765e+07	2.82601e+07	2.85679e+07	3.98652e+07	6.21978e+07	3.32032e+07	2.87211e+07	2.54849e+07	3.22996e+07	3.19606e+07	2.38933e+07	2.30808e+07	2.52866e+07	2.52527e+07	2.49569e+07	2.993e+07	2.48417e+07	3.06459e+07	2.82882e+07	2.85344e+07	2.99395e+07	3.20025e+07	3.47485e+07	3.2209e+07
594	MAC_01308	6.82299	48887400	37906600	19972200	55121300	39828700	17337900	72875300	72282200	18225000	63392900	35292900	19092900	67872600	32990100	14707200	47386800	36002600	15722900	3	7	2.89362e+07	3.22094e+07	3.97113e+07	3.2626e+07	3.38426e+07	3.44734e+07	4.31345e+07	6.14185e+07	3.62373e+07	3.75219e+07	2.99885e+07	3.7963e+07	4.01734e+07	2.80318e+07	2.92427e+07	2.8048e+07	3.05916e+07	3.12623e+07	3.36135e+07	3.41309e+07	3.38963e+07	3.47272e+07	3.41711e+07	3.61286e+07	3.4627e+07	3.43131e+07	3.51523e+07
595	MAC_01309	7.02979	38806300	98978300	46768200	44428900	106421000	38178400	53670600	164995000	36615100	51470200	86840300	48561000	53248300	78634800	35478800	39405100	95289300	39095000	3	9	4.82196e+07	5.59214e+07	6.66179e+07	5.52061e+07	6.01264e+07	5.43823e+07	6.66896e+07	9.322e+07	5.21555e+07	6.39554e+07	4.90636e+07	6.91716e+07	6.61648e+07	4.44276e+07	5.0537e+07	4.89637e+07	5.38372e+07	5.5688e+07	5.60139e+07	5.92576e+07	5.6863e+07	5.87616e+07	6.07101e+07	5.69934e+07	5.35362e+07	5.20799e+07	5.05939e+07
596	MAC_01310	6.34816	NA	4970950	18332200	NA	5292620	14426200	NA	9214920	14389600	NA	4632750	18254000	NA	4089580	12350400	NA	4781930	13330600	2	2	NA	4970950	6.46325e+06	NA	5292620	5.08614e+06	NA	9.21492e+06	5.07324e+06	NA	4632750	6.43568e+06	NA	4089580	4.35429e+06	NA	4781930	4.69987e+06	NA	5.2675e+06	5.51683e+06	NA	5.34399e+06	5.33034e+06	NA	5.14816e+06	4.92133e+06
597	MAC_01311	8.0608	210694000	200220000	307608000	221014000	164715000	254444000	268606000	286737000	274777000	248945000	146161000	288850000	285783000	137135000	209985000	190673000	149920000	230765000	3	9	1.96957e+08	2.52097e+08	2.61348e+08	2.06604e+08	2.07393e+08	2.16179e+08	2.51093e+08	3.61031e+08	2.33454e+08	2.32714e+08	1.84031e+08	2.45411e+08	2.6715e+08	1.72667e+08	1.78406e+08	1.78241e+08	1.88764e+08	1.96061e+08	2.28793e+08	2.67137e+08	2.23078e+08	2.1991e+08	2.09406e+08	2.26558e+08	2.01569e+08	2.017e+08	2.26464e+08
598	MAC_01313	7.71827	127182000	248598000	300696000	145803000	311726000	175323000	187543000	537181000	209906000	152795000	306612000	223926000	166918000	241225000	162821000	130388000	328613000	209944000	3	8	1.82119e+08	1.68954e+08	3.08978e+08	2.08783e+08	2.11858e+08	1.80152e+08	2.68553e+08	3.65083e+08	2.15688e+08	2.18795e+08	2.08382e+08	2.30094e+08	2.39019e+08	1.63943e+08	1.67306e+08	1.86709e+08	2.23334e+08	2.15727e+08	2.11556e+08	1.79033e+08	2.63735e+08	2.22229e+08	2.13914e+08	1.88802e+08	2.15585e+08	2.03963e+08	2.0923e+08
599	MAC_01314	7.14615	50698700	105624000	152538000	63348900	131368000	148114000	93825400	276245000	179438000	67259200	111609000	158328000	72765100	118822000	123106000	47705100	111182000	124663000	3	11	8.51246e+07	8.5377e+07	1.12394e+08	1.06365e+08	1.06186e+08	1.09134e+08	1.57536e+08	2.23292e+08	1.32214e+08	1.1293e+08	9.02147e+07	1.1666e+08	1.22175e+08	9.6045e+07	9.07074e+07	8.00983e+07	8.98695e+07	9.18547e+07	9.88843e+07	9.04703e+07	9.59358e+07	1.13215e+08	1.07217e+08	1.14374e+08	1.26464e+08	1.24748e+08	1.28255e+08
600	MAC_01316	7.30411	76530200	32057700	119378000	84989000	40625600	102419000	106953000	68365400	113512000	97889100	30526900	116462000	103110000	29199900	83336800	72301600	33001300	93189800	3	6	6.00616e+07	6.05245e+07	8.05677e+07	6.67002e+07	7.67006e+07	6.91222e+07	8.39377e+07	1.29073e+08	7.66088e+07	7.68243e+07	5.76344e+07	7.85997e+07	8.09217e+07	5.5129e+07	5.62437e+07	5.6743e+07	6.2306e+07	6.28934e+07	6.97701e+07	6.41353e+07	6.87701e+07	7.09959e+07	7.74451e+07	7.24409e+07	6.73825e+07	7.21101e+07	7.4315e+07
601	MAC_01319	7.37549	156982000	159096000	106790000	137734000	168402000	60567600	110523000	205914000	63141800	151665000	167798000	74728600	195502000	163457000	64038600	142087000	205932000	69504300	3	7	1.31591e+08	1.10473e+08	1.83467e+08	1.15456e+08	1.16935e+08	1.04056e+08	9.26464e+07	1.42983e+08	1.08479e+08	1.27134e+08	1.16516e+08	1.28385e+08	1.6388e+08	1.13501e+08	1.10019e+08	1.19105e+08	1.42995e+08	1.19409e+08	1.52861e+08	1.17064e+08	1.56602e+08	1.22892e+08	1.1807e+08	1.09052e+08	7.43735e+07	7.98811e+07	1.0523e+08
602	MAC_01320	6.97113	36473500	53857500	50476300	41461800	53908500	39043500	56911400	106105000	42122400	47661700	50225200	41005900	50307600	44944200	33289300	35802600	49601000	34019500	3	5	3.8323e+07	4.37721e+07	5.91092e+07	4.35642e+07	4.38135e+07	4.5721e+07	5.97972e+07	8.62357e+07	4.93265e+07	5.00785e+07	4.082e+07	4.80191e+07	5.28585e+07	3.65279e+07	3.89827e+07	3.7618e+07	4.03127e+07	3.98378e+07	4.45175e+07	4.63834e+07	5.04538e+07	4.63699e+07	4.42388e+07	4.79162e+07	4.80033e+07	4.81779e+07	4.78496e+07
603	MAC_01322	6.72315	5576700	31016500	50273800	5497200	45628400	44096900	6920790	72983300	50089500	7054170	35241000	52505700	7594080	30694300	34655600	5086970	30451300	44287300	3	3	1.99378e+07	1.77804e+07	2.45297e+07	1.96536e+07	2.61568e+07	2.15158e+07	2.47432e+07	4.18382e+07	2.44398e+07	2.52201e+07	2.02021e+07	2.56187e+07	2.71504e+07	1.75957e+07	1.69092e+07	1.81869e+07	1.74564e+07	2.16087e+07	2.31606e+07	1.88412e+07	2.09378e+07	2.09194e+07	2.64107e+07	2.25489e+07	1.98631e+07	2.3374e+07	2.3708e+07
604	MAC_01324	6.75569	NA	34007400	21088500	NA	51692900	20354800	NA	83205400	20519700	NA	43004000	22741000	NA	34158100	16917300	NA	38395600	18576400	2	3	NA	34007400	4.75286e+07	NA	5.16929e+07	4.5875e+07	NA	83205400	4.62466e+07	NA	43004000	5.12529e+07	NA	34158100	3.81277e+07	NA	38395600	4.18669e+07	NA	3.60362e+07	4.05689e+07	NA	5.21947e+07	4.80775e+07	NA	4.64849e+07	4.48619e+07
605	MAC_01326	6.91088	21221100	47650000	44424900	22787900	56474500	39858600	31679800	103042000	46346700	28181900	48061300	42806300	29924800	44050900	32363000	19639000	45299600	32775800	3	5	3.19036e+07	3.29915e+07	4.26791e+07	3.42591e+07	3.91013e+07	3.82922e+07	4.76272e+07	7.13433e+07	4.45254e+07	4.23684e+07	3.32763e+07	4.11241e+07	4.49887e+07	3.04996e+07	3.10912e+07	2.95251e+07	3.13641e+07	3.14878e+07	3.70606e+07	3.49597e+07	3.64296e+07	3.64656e+07	3.94809e+07	4.01307e+07	3.82335e+07	3.98579e+07	4.31922e+07
606	MAC_01327	7.65832	75625200	126014000	221447000	83744600	130433000	180975000	121394000	279706000	210172000	101370000	117476000	214464000	99904000	102704000	161124000	67953600	110109000	158425000	3	21	1.1104e+08	1.23076e+08	1.5442e+08	1.22961e+08	1.27392e+08	1.26198e+08	1.78242e+08	2.73185e+08	1.46557e+08	1.48841e+08	1.14737e+08	1.4955e+08	1.46688e+08	1.0031e+08	1.12355e+08	9.97757e+07	1.07542e+08	1.10473e+08	1.28988e+08	1.30419e+08	1.31808e+08	1.30881e+08	1.28629e+08	1.32257e+08	1.43087e+08	1.52622e+08	1.42169e+08
607	MAC_01328	7.00458	51834400	106239000	79980100	58454200	114389000	64957200	67404700	173184000	64186200	66396500	99295000	76150900	69565000	90345600	55744600	49211200	98155400	65081700	3	11	6.60862e+07	7.32672e+07	9.09628e+07	7.45261e+07	7.88878e+07	7.3877e+07	8.59375e+07	1.19436e+08	7.30001e+07	8.46521e+07	6.84783e+07	8.66078e+07	8.86918e+07	6.23064e+07	6.33993e+07	6.27417e+07	6.76924e+07	7.40186e+07	7.67684e+07	7.76382e+07	7.7643e+07	7.93258e+07	7.96536e+07	7.7424e+07	6.89878e+07	6.67259e+07	7.08143e+07
608	MAC_01329	6.39187	9267020	NA	10122400	10023700	NA	8065650	16421600	NA	11365500	12469600	NA	9317760	12776400	NA	6886570	9120920	NA	7729000	2	2	8.12916e+06	NA	1.15393e+07	8.79293e+06	NA	9.19462e+06	1.44053e+07	NA	1.29564e+07	1.09385e+07	NA	1.0622e+07	1.12076e+07	NA	7.8505e+06	8.001e+06	NA	8.81085e+06	9.44317e+06	NA	9.84956e+06	9.35923e+06	NA	9.63608e+06	1.15641e+07	NA	1.25684e+07
609	MAC_01336	6.6741	17301200	23700400	NA	18097300	27395900	NA	22381100	45896300	NA	21094900	24977300	NA	23528300	22373400	NA	15737800	22729600	NA	2	3	2.38805e+07	23700400	NA	2.49794e+07	27395900	NA	3.08922e+07	45896300	NA	2.91169e+07	24977300	NA	3.24757e+07	22373400	NA	2.17226e+07	22729600	NA	2.77406e+07	2.51143e+07	NA	2.65881e+07	2.76618e+07	NA	2.47993e+07	2.56412e+07	NA
610	MAC_01338	7.93167	188614000	287940000	346819000	183209000	273699000	271192000	260260000	510980000	308574000	209379000	255929000	309478000	241371000	225486000	212469000	170419000	242019000	234106000	3	10	2.32106e+08	2.54632e+08	3.18698e+08	2.25454e+08	2.42039e+08	2.49203e+08	3.20272e+08	4.51872e+08	2.83554e+08	2.57659e+08	2.26324e+08	2.84385e+08	2.97028e+08	1.99403e+08	1.95241e+08	2.09715e+08	2.14023e+08	2.15124e+08	2.69624e+08	2.69823e+08	2.72031e+08	2.39975e+08	2.44388e+08	2.61168e+08	2.57104e+08	2.5245e+08	2.75064e+08
611	MAC_01341	7.8758	175426000	269736000	449746000	195721000	286367000	361781000	280728000	524661000	402296000	227264000	251329000	444851000	245307000	221457000	318991000	165778000	244576000	321974000	3	23	2.35975e+08	2.67748e+08	3.36828e+08	2.63275e+08	2.84257e+08	2.70948e+08	3.77622e+08	5.20795e+08	3.01291e+08	3.05705e+08	2.49477e+08	3.33162e+08	3.29975e+08	2.19825e+08	2.38901e+08	2.22997e+08	2.42774e+08	2.41135e+08	2.74118e+08	2.83722e+08	2.87506e+08	2.80231e+08	2.87016e+08	2.83957e+08	3.03143e+08	2.90956e+08	2.9227e+08
612	MAC_01346	6.62721	30082800	48441000	54348400	34652300	54727300	45885000	47453000	114528000	56293900	37844300	48373900	53912400	40289200	45487900	40219000	33613300	50723700	42538000	3	10	3.80382e+07	3.97597e+07	5.23667e+07	4.38161e+07	4.49194e+07	4.42119e+07	6.0002e+07	9.4003e+07	5.42412e+07	4.78523e+07	3.97046e+07	5.19466e+07	5.09437e+07	3.73358e+07	3.87525e+07	4.25024e+07	4.16333e+07	4.09869e+07	4.41868e+07	4.21316e+07	4.46986e+07	4.6638e+07	4.53554e+07	4.63346e+07	4.81677e+07	5.25173e+07	5.26172e+07
613	MAC_01347	7.96327	328067000	520655000	518518000	341996000	531480000	453205000	444589000	923494000	457014000	415081000	473833000	551958000	434036000	394412000	396059000	290632000	428229000	425580000	3	23	3.96268e+08	4.46286e+08	5.00812e+08	4.13092e+08	4.55565e+08	4.37729e+08	5.37013e+08	7.91584e+08	4.41408e+08	5.01371e+08	4.06152e+08	5.3311e+08	5.24266e+08	3.38075e+08	3.82535e+08	3.5105e+08	3.67062e+08	4.11048e+08	4.60321e+08	4.7291e+08	4.27478e+08	4.39697e+08	4.59987e+08	4.58746e+08	4.31097e+08	4.4224e+08	4.28192e+08
614	MAC_01348	6.9648	20254400	76893600	19375800	29795000	81459000	19379500	49187500	237203000	25191000	30669400	94577600	23704900	32142200	79556700	23238500	15277200	57454400	14375300	3	7	2.74681e+07	3.10432e+07	3.53895e+07	4.04066e+07	3.28863e+07	3.53962e+07	6.67058e+07	9.57628e+07	4.60108e+07	4.15924e+07	3.81825e+07	4.32965e+07	4.35898e+07	3.21184e+07	4.24446e+07	2.07182e+07	2.31953e+07	2.62562e+07	3.19081e+07	3.28952e+07	3.02074e+07	4.3009e+07	3.32056e+07	3.70957e+07	5.35493e+07	5.35005e+07	4.46331e+07
615	MAC_01349	7.59342	111942000	142412000	148012000	138583000	171692000	131436000	187019000	306994000	154135000	151664000	143530000	147573000	155160000	129299000	109822000	110841000	147766000	117989000	3	11	1.16531e+08	1.25477e+08	1.61373e+08	1.44264e+08	1.51275e+08	1.433e+08	1.94686e+08	2.70488e+08	1.68048e+08	1.57882e+08	1.26462e+08	1.60894e+08	1.61521e+08	1.13923e+08	1.19735e+08	1.15385e+08	1.30194e+08	1.28639e+08	1.35368e+08	1.32963e+08	1.37743e+08	1.53556e+08	1.52744e+08	1.5018e+08	1.56288e+08	1.51115e+08	1.63017e+08
616	MAC_01350	8.16322	477096000	779864000	1216310000	571350000	817857000	717596000	685928000	1293350000	712795000	647701000	751246000	903724000	672817000	692103000	741217000	447472000	827069000	689416000	3	26	6.07164e+08	6.79265e+08	1.0973e+09	7.27115e+08	7.12357e+08	6.4738e+08	8.72929e+08	1.12651e+09	6.43049e+08	8.24281e+08	6.54338e+08	8.15296e+08	8.56244e+08	6.02824e+08	6.6869e+08	5.69464e+08	7.2038e+08	6.21957e+08	7.05308e+08	7.19788e+08	9.36618e+08	7.73943e+08	7.19271e+08	6.78462e+08	7.0076e+08	6.29357e+08	6.23795e+08
617	MAC_01351	6.43846	5855700	5990910	NA	5568780	5722250	NA	6651380	8934720	NA	6006250	4795000	NA	8432900	5369390	NA	5369680	4826760	NA	2	2	5.44336e+06	5990910	NA	5.17665e+06	5722250	NA	6.18301e+06	8.93472e+06	NA	5.58331e+06	4795000	NA	7.83908e+06	5369390	NA	4.99157e+06	4826760	NA	6.32324e+06	6.34831e+06	NA	5.51004e+06	5.77779e+06	NA	4.96352e+06	4.99162e+06	NA
618	MAC_01352	6.86514	12657700	48623100	9658340	13597600	58909300	10373500	20962000	120535000	8155190	17105100	55900200	11489800	17662900	46389000	7834790	10589500	49722700	8431160	3	4	1.70233e+07	1.65131e+07	2.1146e+07	1.82873e+07	2.00065e+07	2.27118e+07	2.81917e+07	4.09355e+07	1.7855e+07	2.30045e+07	1.89845e+07	2.51558e+07	2.37547e+07	1.57544e+07	1.71535e+07	1.42418e+07	1.68866e+07	1.84592e+07	1.97749e+07	1.74983e+07	1.80496e+07	1.94651e+07	2.02007e+07	2.38022e+07	2.26314e+07	2.28697e+07	1.73204e+07
619	MAC_01353	7.7111	153602000	188709000	286052000	188485000	196740000	191144000	226325000	332294000	201575000	205104000	188213000	229253000	214457000	169950000	175080000	157809000	190360000	175755000	3	17	1.62719e+08	1.83873e+08	2.77127e+08	1.99673e+08	1.91698e+08	1.8518e+08	2.39759e+08	3.23778e+08	1.95286e+08	2.17278e+08	1.83389e+08	2.221e+08	2.27186e+08	1.65595e+08	1.69617e+08	1.67176e+08	1.85481e+08	1.70271e+08	1.89021e+08	1.94842e+08	2.36547e+08	2.12532e+08	1.93559e+08	1.94071e+08	1.9247e+08	1.80887e+08	1.89438e+08
620	MAC_01355	7.42056	152174000	144301000	120138000	156615000	143777000	83588800	202465000	242310000	97121600	182893000	138789000	100156000	208033000	129126000	77664600	131293000	129558000	75444900	3	5	1.1874e+08	1.27062e+08	1.74854e+08	1.22206e+08	1.26601e+08	1.21659e+08	1.57982e+08	2.13363e+08	1.41355e+08	1.4271e+08	1.22209e+08	1.45771e+08	1.62327e+08	1.137e+08	1.13036e+08	1.02447e+08	1.1408e+08	1.09806e+08	1.37934e+08	1.34642e+08	1.4925e+08	1.30076e+08	1.2783e+08	1.275e+08	1.26823e+08	1.19201e+08	1.37122e+08
621	MAC_01356	7.48299	34657300	78358100	152104000	32310400	70550500	90194300	43529000	111048000	84727600	36815400	64051100	124889000	38912300	58136900	99163000	34833700	70978900	99418000	3	4	6.23745e+07	7.00274e+07	9.4568e+07	5.81507e+07	6.30498e+07	5.60767e+07	7.83413e+07	9.92418e+07	5.26779e+07	6.62585e+07	5.72414e+07	7.76476e+07	7.00324e+07	5.1956e+07	6.16529e+07	6.2692e+07	6.34327e+07	6.18114e+07	7.24568e+07	7.4205e+07	8.07204e+07	6.18958e+07	6.36618e+07	5.87691e+07	6.28899e+07	5.54441e+07	5.11006e+07
622	MAC_01357	6.97079	35471200	79415300	39995800	36843900	63523600	27189600	41885800	94471900	28551100	38283500	58492500	39289000	47944700	52451200	27643400	36202500	56178800	29762300	3	3	3.9266e+07	5.22898e+07	5.48732e+07	4.07856e+07	4.18261e+07	3.73034e+07	4.63669e+07	6.22036e+07	3.91714e+07	4.23792e+07	3.85135e+07	5.39035e+07	5.3074e+07	3.45357e+07	3.79261e+07	4.00756e+07	3.69901e+07	4.08331e+07	4.56131e+07	5.54093e+07	4.68381e+07	4.34123e+07	4.22321e+07	3.90945e+07	3.72218e+07	3.47517e+07	3.79985e+07
623	MAC_01359	7.36244	101054000	170853000	87503900	97009800	123863000	34636700	86808200	132349000	22119100	110293000	113224000	54794100	109999000	113491000	48777700	112858000	133388000	53564800	3	7	8.37383e+07	1.11817e+08	1.6135e+08	8.03871e+07	8.10641e+07	6.38674e+07	7.19335e+07	8.66179e+07	4.07859e+07	9.13942e+07	7.41012e+07	1.01036e+08	9.11505e+07	7.42759e+07	8.99423e+07	9.35197e+07	8.72978e+07	9.87693e+07	9.72739e+07	1.18488e+08	1.37724e+08	8.55643e+07	8.18509e+07	6.69338e+07	5.77459e+07	4.83914e+07	3.95647e+07
624	MAC_01360	6.60687	36256800	34005800	38116600	38927400	33803900	34195100	51804600	66055100	38713200	40598900	29222300	39425100	44559300	27115900	28470100	31906500	30434600	33288800	3	8	3.30981e+07	3.56781e+07	3.97972e+07	3.5536e+07	3.54663e+07	3.57028e+07	4.72913e+07	6.93035e+07	4.04201e+07	3.70619e+07	3.06594e+07	4.11634e+07	4.06773e+07	2.84494e+07	2.97253e+07	2.91268e+07	3.19313e+07	3.47565e+07	3.84481e+07	3.78066e+07	3.39696e+07	3.78247e+07	3.58105e+07	3.74169e+07	3.7964e+07	3.87183e+07	3.92098e+07
625	MAC_01361	6.718	26037500	25023200	NA	26507100	23764500	NA	30119600	46138700	NA	29375200	24315300	NA	33488300	23487000	NA	35311300	25287800	NA	2	5	2.35591e+07	25023200	NA	2.3984e+07	23764500	NA	2.72526e+07	46138700	NA	2.65791e+07	24315300	NA	3.03007e+07	23487000	NA	3.19502e+07	25287800	NA	2.73672e+07	2.6516e+07	NA	2.55287e+07	2.39952e+07	NA	2.18775e+07	2.57766e+07	NA
626	MAC_01362	6.59311	19466400	22061900	48538000	24252700	26825400	41525000	33658100	52475400	50924400	25850100	24447500	48712100	26967100	21760500	36523300	21098800	23603200	36807700	3	10	2.41368e+07	2.51179e+07	3.43833e+07	3.00715e+07	3.05412e+07	2.94154e+07	4.17334e+07	5.97442e+07	3.60738e+07	3.20521e+07	2.78339e+07	3.45066e+07	3.34371e+07	2.47747e+07	2.58723e+07	2.61609e+07	2.68727e+07	2.60738e+07	2.80384e+07	2.66163e+07	2.93485e+07	3.20082e+07	3.08376e+07	3.08277e+07	3.35023e+07	3.33777e+07	3.49937e+07
627	MAC_01365	7.24458	84480000	113252000	183899000	96283200	140594000	152838000	129014000	226075000	156358000	108917000	114745000	171644000	117586000	107577000	131202000	81555300	111722000	143228000	3	14	1.05915e+08	1.10386e+08	1.50489e+08	1.20713e+08	1.37037e+08	1.25071e+08	1.61749e+08	2.20355e+08	1.27951e+08	1.36553e+08	1.11842e+08	1.4046e+08	1.47422e+08	1.04855e+08	1.07366e+08	1.02249e+08	1.08895e+08	1.17207e+08	1.23036e+08	1.16972e+08	1.28453e+08	1.28488e+08	1.38367e+08	1.31076e+08	1.29847e+08	1.23107e+08	1.2412e+08
628	MAC_01366	6.81126	14239800	47532600	44479100	16642500	45522200	39413800	22771400	81558500	45722200	18848500	40854400	42342700	21701300	38186400	32885300	14175200	40003800	32349900	3	5	2.56769e+07	3.22559e+07	3.63495e+07	3.00094e+07	3.08917e+07	3.221e+07	4.1061e+07	5.53461e+07	3.73654e+07	3.39873e+07	2.77241e+07	3.46036e+07	3.91314e+07	2.59135e+07	2.68748e+07	2.55605e+07	2.71468e+07	2.64372e+07	2.98274e+07	3.41802e+07	3.10268e+07	3.19422e+07	3.11915e+07	3.37565e+07	3.29624e+07	3.09206e+07	3.62466e+07
629	MAC_01367	7.26463	42739800	81141900	206762000	42661300	79437500	178154000	50337600	126573000	167608000	52512000	67615600	205958000	56182700	61934000	147620000	35158900	64537800	189147000	3	11	8.03666e+07	9.03713e+07	9.87285e+07	8.0219e+07	8.8473e+07	8.50682e+07	9.46533e+07	1.4097e+08	8.00325e+07	9.87419e+07	7.53065e+07	9.83445e+07	1.05644e+08	6.89786e+07	7.04883e+07	6.61117e+07	7.18786e+07	9.03173e+07	9.33572e+07	9.57626e+07	8.42716e+07	8.53854e+07	8.93318e+07	8.91525e+07	7.59846e+07	7.87566e+07	7.76362e+07
630	MAC_01371	6.71345	24624600	38654200	24107800	29419800	41366000	20325600	39731900	82626800	23244100	32879100	36716000	22486500	35700100	32596400	17020700	23656200	36934600	17741400	3	6	2.41549e+07	2.72193e+07	3.49012e+07	2.88587e+07	2.91289e+07	2.94257e+07	3.89741e+07	5.81837e+07	3.36509e+07	3.2252e+07	2.58545e+07	3.25541e+07	3.50192e+07	2.29536e+07	2.46411e+07	2.3205e+07	2.60084e+07	2.56845e+07	2.80594e+07	2.88431e+07	2.97906e+07	3.07173e+07	2.94116e+07	3.08385e+07	3.12871e+07	3.25059e+07	3.26433e+07
631	MAC_01374	7.62999	138794000	209061000	207339000	163532000	236363000	191597000	251220000	621022000	277523000	182496000	238752000	210416000	204814000	200849000	158245000	141581000	206238000	147703000	3	17	1.63007e+08	1.67118e+08	2.20849e+08	1.9206e+08	1.88943e+08	2.04081e+08	2.95045e+08	4.9643e+08	2.95606e+08	2.14332e+08	1.90853e+08	2.24126e+08	2.40544e+08	1.60554e+08	1.68556e+08	1.6628e+08	1.64862e+08	1.57327e+08	1.89355e+08	1.77088e+08	1.8851e+08	2.0443e+08	1.90777e+08	2.1388e+08	2.36853e+08	2.77344e+08	2.86755e+08
632	MAC_01377	6.73009	17832400	18393300	NA	19710900	21849700	NA	28498000	46189900	NA	21834600	19454200	NA	24390800	16647900	NA	17085700	18014200	NA	2	3	1.83524e+07	18393300	NA	2.02857e+07	21849700	NA	2.93291e+07	46189900	NA	2.24714e+07	19454200	NA	2.51021e+07	16647900	NA	1.7584e+07	18014200	NA	2.1319e+07	1.94906e+07	NA	2.15922e+07	2.20618e+07	NA	2.35444e+07	2.58052e+07	NA
633	MAC_01379	7.36198	74880800	116281000	66788100	75923600	128254000	52784500	99377000	191326000	52476500	88570200	109872000	67395300	103467000	90840200	50286400	69948500	91870800	51775500	3	6	7.30946e+07	8.16378e+07	9.74545e+07	7.41125e+07	9.00437e+07	7.7021e+07	9.70065e+07	1.34325e+08	7.65716e+07	8.64575e+07	7.71382e+07	9.83405e+07	1.00999e+08	6.37765e+07	7.33759e+07	6.828e+07	6.45e+07	7.55487e+07	8.49098e+07	8.65081e+07	8.31841e+07	7.88857e+07	9.09177e+07	8.07189e+07	7.78737e+07	7.50442e+07	7.42789e+07
634	MAC_01380	8.46505	765636000	1306600000	2011740000	840001000	1385520000	1701720000	1196340000	2584260000	2020670000	1038680000	1270590000	2092360000	1024660000	1110410000	1516770000	670702000	1227740000	1507120000	3	34	1.11647e+09	1.21659e+09	1.48165e+09	1.22491e+09	1.29007e+09	1.25332e+09	1.74453e+09	2.40624e+09	1.48822e+09	1.51463e+09	1.18306e+09	1.54102e+09	1.49419e+09	1.03392e+09	1.1171e+09	9.78036e+08	1.14316e+09	1.10999e+09	1.29694e+09	1.28917e+09	1.26469e+09	1.3038e+09	1.3026e+09	1.31349e+09	1.40046e+09	1.34431e+09	1.44366e+09
635	MAC_01382	6.49333	8156740	17014900	28272400	8933170	16482300	22260200	11343300	24274100	19552800	10989300	13769000	26517000	11237000	12732800	18210700	7263750	13016600	22400400	3	4	1.2887e+07	1.61902e+07	1.88063e+07	1.41137e+07	1.56834e+07	1.48071e+07	1.79215e+07	2.30976e+07	1.30062e+07	1.73622e+07	1.31016e+07	1.76387e+07	1.77536e+07	1.21157e+07	1.21135e+07	1.14761e+07	1.23857e+07	1.49004e+07	1.49701e+07	1.71561e+07	1.60525e+07	1.50227e+07	1.58357e+07	1.5518e+07	1.43868e+07	1.29041e+07	1.26168e+07
636	MAC_01383	7.74688	370509000	439621000	423216000	402893000	477081000	342918000	530145000	781077000	352162000	472455000	410636000	395459000	492137000	373944000	298533000	337880000	414784000	325153000	3	25	3.57653e+08	3.89283e+08	4.95121e+08	3.88914e+08	4.22454e+08	4.0118e+08	5.1175e+08	6.91641e+08	4.11995e+08	4.56062e+08	3.63617e+08	4.62648e+08	4.75061e+08	3.31126e+08	3.49254e+08	3.26156e+08	3.6729e+08	3.80397e+08	4.15465e+08	4.12507e+08	4.2262e+08	4.13961e+08	4.26554e+08	4.20442e+08	4.10817e+08	3.86404e+08	3.99659e+08
637	MAC_01384	7.30021	59475600	128365000	126300000	66533400	122981000	108023000	77413400	200876000	109941000	77457300	103752000	118975000	77900800	95362200	90958200	56412300	111163000	107765000	3	14	8.45404e+07	1.01651e+08	1.12206e+08	9.45725e+07	9.7387e+07	9.59683e+07	1.10038e+08	1.59071e+08	9.76723e+07	1.101e+08	8.21598e+07	1.05698e+08	1.1073e+08	7.55161e+07	8.08078e+07	8.01861e+07	8.80285e+07	9.57391e+07	9.82056e+07	1.07715e+08	9.57753e+07	1.00663e+08	9.83323e+07	1.00576e+08	8.83347e+07	8.88693e+07	9.47478e+07
638	MAC_01385	6.83814	34415200	48003400	56402500	37873600	52321600	44527500	48651200	82166200	43173800	44193500	44001600	53577000	44246300	39562800	37712900	32301100	43952200	43004900	3	10	3.89481e+07	4.32232e+07	5.535e+07	4.2862e+07	4.71114e+07	4.36966e+07	5.50592e+07	7.3984e+07	4.23682e+07	5.00143e+07	3.96199e+07	5.25772e+07	5.00741e+07	3.56231e+07	3.70092e+07	3.65556e+07	3.95754e+07	4.22024e+07	4.52437e+07	4.58017e+07	4.72451e+07	4.56225e+07	4.75686e+07	4.57946e+07	4.41997e+07	4.13332e+07	4.10996e+07
639	MAC_01390	8.33403	442266000	699954000	825037000	469620000	622161000	605294000	630330000	1099220000	602674000	548476000	525953000	894003000	550897000	459058000	659243000	413493000	534442000	622164000	3	20	5.29426e+08	6.71447e+08	7.18471e+08	5.62171e+08	5.96822e+08	5.27111e+08	7.54553e+08	1.05445e+09	5.24829e+08	6.56568e+08	5.04533e+08	7.78529e+08	6.59466e+08	4.40362e+08	5.74092e+08	4.94983e+08	5.12676e+08	5.41802e+08	6.15004e+08	7.11504e+08	6.13265e+08	5.98377e+08	6.02616e+08	5.52419e+08	6.05731e+08	5.89098e+08	5.09115e+08
640	MAC_01401	6.77438	20034700	NA	34273500	21771100	NA	29526500	26440700	NA	31540000	23090200	NA	34406600	27106700	NA	24596900	21131400	NA	24551900	2	3	2.2645e+07	NA	3.03228e+07	2.46076e+07	NA	2.6123e+07	2.98856e+07	NA	2.79044e+07	2.60986e+07	NA	3.04406e+07	3.06384e+07	NA	2.17616e+07	2.38846e+07	NA	2.17218e+07	2.63054e+07	NA	2.58826e+07	2.61924e+07	NA	2.73772e+07	2.39912e+07	NA	2.70689e+07
641	MAC_01402	7.01499	30861600	55663600	48748600	30044400	51054600	36535100	34768300	74432500	35882600	37335000	43715400	47268200	41945300	39455300	31265200	27222400	39496000	42277500	3	6	3.73122e+07	4.54892e+07	4.93393e+07	3.63242e+07	4.17226e+07	3.69778e+07	4.20354e+07	6.08274e+07	3.63174e+07	4.51386e+07	3.57249e+07	4.7841e+07	5.07125e+07	3.22435e+07	3.16441e+07	3.29123e+07	3.22768e+07	4.27898e+07	4.33434e+07	4.8203e+07	4.21145e+07	3.86636e+07	4.21276e+07	3.87532e+07	3.37447e+07	3.39829e+07	3.523e+07
642	MAC_01414	6.46479	NA	7409930	6224790	NA	7521220	6161320	NA	12533300	5987200	NA	6688010	7651230	NA	6639630	4644370	NA	7397620	6311840	2	2	NA	7409930	7.98489e+06	NA	7521220	7.90347e+06	NA	12533300	7.68012e+06	NA	6688010	9.81466e+06	NA	6.63963e+06	5.95759e+06	NA	7397620	8.09655e+06	NA	7.85199e+06	6.81565e+06	NA	7.59423e+06	8.28293e+06	NA	7.00207e+06	7.45016e+06
643	MAC_01417	6.91948	54825900	69001400	45592100	63459100	72926000	37149900	71033700	112290000	36702200	65274300	62097300	41507200	73438200	60275200	31325400	54718100	66014100	38073900	3	9	4.83021e+07	5.34941e+07	6.67516e+07	5.5908e+07	5.65367e+07	5.43913e+07	6.25813e+07	8.70541e+07	5.37358e+07	5.75072e+07	4.81416e+07	6.07709e+07	6.46996e+07	4.6729e+07	4.58636e+07	4.82071e+07	5.11782e+07	5.57442e+07	5.61097e+07	5.66855e+07	5.69771e+07	5.95087e+07	5.70855e+07	5.70028e+07	5.02382e+07	4.86351e+07	5.21269e+07
644	MAC_01418	7.06158	83033300	105275000	140491000	94011100	102230000	123425000	121432000	195492000	130208000	105501000	93267100	141495000	107712000	85164600	105213000	74406200	93368500	108108000	3	15	9.37122e+07	1.06328e+08	1.23249e+08	1.06102e+08	1.03253e+08	1.08277e+08	1.37049e+08	1.97448e+08	1.14228e+08	1.19069e+08	9.42001e+07	1.24129e+08	1.21565e+08	8.60165e+07	9.23002e+07	8.39756e+07	9.43025e+07	9.48399e+07	1.0886e+08	1.12671e+08	1.05201e+08	1.12935e+08	1.04255e+08	1.13476e+08	1.10019e+08	1.10309e+08	1.10807e+08
645	MAC_01421	7.87469	186986000	261425000	287479000	196686000	310194000	210777000	305867000	630373000	253145000	236806000	281064000	269888000	247498000	241871000	202695000	159755000	262977000	192229000	3	15	2.15886e+08	2.10557e+08	3.0915e+08	2.27085e+08	2.49837e+08	2.26666e+08	3.5314e+08	5.07715e+08	2.72228e+08	2.73405e+08	2.26375e+08	2.90233e+08	2.8575e+08	1.94808e+08	2.17975e+08	1.84446e+08	2.11807e+08	2.0672e+08	2.50782e+08	2.23118e+08	2.63881e+08	2.4171e+08	2.52262e+08	2.37549e+08	2.8349e+08	2.83649e+08	2.64077e+08
646	MAC_01426	6.22503	7528940	19424500	NA	9502690	23086100	NA	12740900	50318600	NA	12668900	20915500	NA	11960000	18286600	NA	7673100	18223300	NA	2	3	1.73237e+07	19424500	NA	2.18652e+07	23086100	NA	2.93161e+07	50318600	NA	2.91504e+07	20915500	NA	2.75193e+07	18286600	NA	1.76554e+07	18223300	NA	2.01239e+07	2.05833e+07	NA	2.32733e+07	2.33102e+07	NA	2.3534e+07	2.81118e+07	NA
647	MAC_01428	6.97169	31076000	52340500	78350900	32251200	59398900	51131800	42173800	106576000	53510600	40366400	56913000	78702500	44681200	46150200	54365400	28004400	52782200	47058900	3	7	4.35521e+07	4.3984e+07	6.65279e+07	4.51991e+07	4.99154e+07	4.34161e+07	5.91053e+07	8.95604e+07	4.5436e+07	5.65723e+07	4.78264e+07	6.68264e+07	6.26193e+07	3.8782e+07	4.61618e+07	3.92473e+07	4.43551e+07	3.99578e+07	5.05919e+07	4.66079e+07	5.67862e+07	4.81101e+07	5.03999e+07	4.55006e+07	4.74478e+07	5.00353e+07	4.40755e+07
648	MAC_01430	7.654	192930000	291606000	344997000	224419000	317294000	301230000	328675000	637466000	374559000	263825000	275897000	347592000	264365000	251543000	249638000	173706000	261966000	255759000	3	16	2.3355e+08	2.60306e+08	3.19263e+08	2.71669e+08	2.83236e+08	2.7876e+08	3.97875e+08	5.69042e+08	3.4662e+08	3.19371e+08	2.46283e+08	3.21664e+08	3.20025e+08	2.24543e+08	2.31017e+08	2.10279e+08	2.33847e+08	2.36681e+08	2.71301e+08	2.75835e+08	2.72513e+08	2.89165e+08	2.85986e+08	2.92144e+08	3.19401e+08	3.1791e+08	3.36241e+08
649	MAC_01431	7.19385	42236600	94316500	59313200	41392200	83027600	46464800	53284200	138183000	51130600	50530300	78390100	58257900	50683100	64280800	42018600	37784200	72009500	53107800	3	7	5.41824e+07	6.45029e+07	6.76068e+07	5.30992e+07	5.67824e+07	5.29619e+07	6.83546e+07	9.45031e+07	5.82801e+07	6.48218e+07	5.36109e+07	6.6404e+07	6.50178e+07	4.39615e+07	4.7894e+07	4.84707e+07	4.92472e+07	6.05337e+07	6.29405e+07	6.8351e+07	5.77071e+07	5.6519e+07	5.73336e+07	5.55047e+07	5.48729e+07	5.27967e+07	5.65351e+07
650	MAC_01433	6.93086	35905500	54663200	56033800	39644300	64506400	50371500	52836800	108663000	53810900	43302900	57920500	54102200	49117400	51386500	38104300	35837500	57193300	43404900	3	9	4.31177e+07	4.37707e+07	5.8273e+07	4.76075e+07	5.16525e+07	5.23844e+07	6.34499e+07	8.70102e+07	5.59612e+07	5.2001e+07	4.63789e+07	5.62642e+07	5.89834e+07	4.11469e+07	3.9627e+07	4.3036e+07	4.57966e+07	4.51394e+07	5.00873e+07	4.63819e+07	4.974e+07	5.06736e+07	5.21538e+07	5.48995e+07	5.09355e+07	4.86106e+07	5.42857e+07
651	MAC_01435	6.387	NA	17578900	5838650	NA	18369100	4940150	NA	35031600	4882250	NA	16121100	4667540	NA	16268700	3590620	NA	19543600	4005770	2	2	NA	17578900	2.498e+07	NA	18369100	2.11358e+07	NA	35031600	2.08881e+07	NA	16121100	1.99695e+07	NA	16268700	1.5362e+07	NA	19543600	1.71382e+07	NA	1.86276e+07	2.13221e+07	NA	1.85474e+07	2.21506e+07	NA	1.95713e+07	2.02627e+07
652	MAC_01436	6.49555	10916200	11062700	11772800	12114400	12819300	10725600	18816200	26287200	12678300	13999400	10610300	13018800	15973400	10821000	9014370	9990100	11061200	9281590	3	5	1.01444e+07	1.05593e+07	1.32724e+07	1.12579e+07	1.2236e+07	1.20918e+07	1.74859e+07	2.5091e+07	1.42933e+07	1.30096e+07	1.01275e+07	1.46771e+07	1.48441e+07	1.03286e+07	1.01626e+07	9.28379e+06	1.05579e+07	1.04639e+07	1.17842e+07	1.11893e+07	1.13289e+07	1.19829e+07	1.23547e+07	1.26724e+07	1.40371e+07	1.40178e+07	1.38653e+07
653	MAC_01438	6.86213	12230900	24243300	NA	12678600	23260500	NA	15763500	40728900	NA	13456800	23230700	NA	16521100	21418100	NA	13717700	22308500	NA	2	3	2.20355e+07	24243300	NA	2.2842e+07	23260500	NA	2.83999e+07	40728900	NA	2.42441e+07	23230700	NA	2.97648e+07	21418100	NA	2.47141e+07	22308500	NA	2.55973e+07	2.56896e+07	NA	2.43132e+07	2.34863e+07	NA	2.27985e+07	2.27543e+07	NA
654	MAC_01439	7.20356	25309300	51881300	82418800	37340700	57813700	57144700	42365800	110156000	68527800	36066400	45624800	69885700	37920800	44545700	50048400	31203600	62222300	51853800	3	5	3.67853e+07	4.42604e+07	6.64702e+07	5.42722e+07	4.93214e+07	4.60868e+07	6.15758e+07	9.39751e+07	5.52672e+07	5.24201e+07	3.89229e+07	5.63623e+07	5.51153e+07	3.80024e+07	4.03637e+07	4.53523e+07	5.30824e+07	4.18197e+07	4.27314e+07	4.69009e+07	5.67369e+07	5.77675e+07	4.98002e+07	4.82995e+07	4.94311e+07	5.25017e+07	5.36124e+07
655	MAC_01441	7.23537	107559000	97509800	34608600	104498000	91237700	22291700	118618000	137641000	22076900	117008000	72115700	30215900	139192000	80389800	21953600	107476000	101782000	26335200	3	4	6.12348e+07	6.74935e+07	8.78252e+07	5.94921e+07	6.31521e+07	5.6569e+07	6.75308e+07	9.52712e+07	5.60239e+07	6.66142e+07	4.99164e+07	7.6678e+07	7.92438e+07	5.56435e+07	5.5711e+07	6.11875e+07	7.04506e+07	6.683e+07	7.11328e+07	7.152e+07	7.49649e+07	6.33236e+07	6.37651e+07	5.9285e+07	5.42115e+07	5.32258e+07	5.43464e+07
656	MAC_01442	6.65075	13949200	34863600	NA	16528300	44903000	NA	21821500	76782900	NA	18719000	41300000	NA	20101100	37975100	NA	13788300	38856900	NA	2	5	3.56923e+07	34863600	NA	4.22916e+07	44903000	NA	5.58355e+07	76782900	NA	4.7897e+07	41300000	NA	5.14334e+07	37975100	NA	3.52806e+07	38856900	NA	4.14617e+07	3.69435e+07	NA	4.50153e+07	4.53389e+07	NA	4.48229e+07	4.28968e+07	NA
657	MAC_01443	7.30165	48561300	NA	134835000	43199000	NA	69262800	52151800	NA	77315600	52109900	NA	83758700	60946400	NA	65923100	49128100	NA	76924900	2	4	6.17774e+07	NA	1.0599e+08	5.49557e+07	NA	5.44453e+07	6.63451e+07	NA	6.07754e+07	6.62918e+07	NA	6.58401e+07	7.75332e+07	NA	5.18201e+07	6.24985e+07	NA	6.04683e+07	7.17632e+07	NA	9.04695e+07	5.84951e+07	NA	5.70594e+07	5.32597e+07	NA	5.89557e+07
658	MAC_01444	6.32749	NA	11813500	10430300	NA	13594600	8561880	NA	23489900	7853600	NA	12116000	11628600	NA	9839290	8300820	NA	9260810	8570770	2	3	NA	11813500	1.44865e+07	NA	13594600	1.18915e+07	NA	23489900	1.09077e+07	NA	12116000	1.61508e+07	NA	9839290	1.15289e+07	NA	9.26081e+06	1.19038e+07	NA	1.25183e+07	1.23652e+07	NA	1.37266e+07	1.24624e+07	NA	1.31233e+07	1.05811e+07
659	MAC_01446	8.3146	197810000	489085000	788539000	220760000	558481000	653805000	310378000	1194470000	729920000	266307000	502538000	819961000	265625000	431654000	575060000	178425000	491041000	553726000	3	17	3.78223e+08	3.85698e+08	5.2295e+08	4.22105e+08	4.40424e+08	4.33596e+08	5.9346e+08	9.41973e+08	4.84074e+08	5.09193e+08	3.96307e+08	5.43788e+08	5.07889e+08	3.40407e+08	3.81373e+08	3.41158e+08	3.8724e+08	3.67225e+08	4.3936e+08	4.08708e+08	4.46374e+08	4.4929e+08	4.447e+08	4.54414e+08	4.7641e+08	5.26258e+08	4.6958e+08
660	MAC_01448	6.80556	20821800	NA	42600800	24395800	NA	36156900	32974200	NA	43410100	29490700	NA	40868900	29647600	NA	29740500	19902500	NA	29945200	2	4	2.48499e+07	NA	3.56953e+07	2.91153e+07	NA	3.0296e+07	3.93533e+07	NA	3.63734e+07	3.51959e+07	NA	3.42442e+07	3.53831e+07	NA	2.49196e+07	2.37528e+07	NA	2.50912e+07	2.88667e+07	NA	3.04684e+07	3.09905e+07	NA	3.17505e+07	3.15915e+07	NA	3.52843e+07
661	MAC_01449	6.73333	36330600	68715000	15082300	38281500	64734900	13378600	49864500	125860000	11419200	43798900	64004000	15715500	45354700	54547600	10290900	33805700	63600400	12719500	3	8	2.97354e+07	3.25328e+07	3.89221e+07	3.13322e+07	3.06484e+07	3.45255e+07	4.08125e+07	5.95878e+07	2.94689e+07	3.5848e+07	3.03024e+07	4.05562e+07	3.71214e+07	2.58253e+07	2.65572e+07	2.76689e+07	3.01113e+07	3.28246e+07	3.45419e+07	3.44736e+07	3.32227e+07	3.33501e+07	3.09459e+07	3.61831e+07	3.27629e+07	3.32903e+07	2.85866e+07
662	MAC_01460	7.59685	109747000	222180000	375628000	120726000	218096000	323215000	173926000	449408000	323013000	139381000	192005000	401026000	142242000	173968000	264766000	106497000	194707000	298834000	3	15	1.80092e+08	2.07875e+08	2.44658e+08	1.98108e+08	2.04054e+08	2.1052e+08	2.85408e+08	4.20473e+08	2.10388e+08	2.28721e+08	1.79643e+08	2.612e+08	2.33416e+08	1.62767e+08	1.7245e+08	1.74759e+08	1.82171e+08	1.94639e+08	2.09203e+08	2.20276e+08	2.08832e+08	2.10867e+08	2.06035e+08	2.20627e+08	2.29117e+08	2.34908e+08	2.04089e+08
663	MAC_01463	7.89349	141483000	274258000	344150000	141818000	281540000	248644000	178446000	463591000	239521000	175181000	236723000	336836000	184006000	204532000	229436000	123982000	214946000	259906000	3	9	2.04361e+08	2.30107e+08	2.83978e+08	2.04845e+08	2.36216e+08	2.0517e+08	2.57751e+08	3.8896e+08	1.97642e+08	2.53035e+08	1.98614e+08	2.77942e+08	2.65782e+08	1.71605e+08	1.89321e+08	1.79082e+08	1.80343e+08	2.14463e+08	2.37394e+08	2.43834e+08	2.42395e+08	2.18038e+08	2.38509e+08	2.15021e+08	2.06914e+08	2.17303e+08	1.91725e+08
664	MAC_01464	6.52208	NA	15837400	33673100	NA	16643500	31318400	NA	23280900	29938400	NA	14916400	34372600	NA	11564300	24704400	NA	14543900	30015100	2	4	NA	15837400	1.74144e+07	NA	16643500	1.61967e+07	NA	23280900	1.5483e+07	NA	14916400	1.77762e+07	NA	11564300	1.27762e+07	NA	14543900	1.55226e+07	NA	1.67822e+07	1.48644e+07	NA	1.68051e+07	1.69743e+07	NA	1.30065e+07	1.50194e+07
665	MAC_01465	6.86668	41019300	63593900	32259200	45670700	54209100	28615800	60485100	114844000	30648000	51921900	48389700	33155400	52132700	46098900	23946000	36521800	51269600	31254300	3	8	3.80066e+07	4.66858e+07	4.74256e+07	4.23164e+07	3.97962e+07	4.20693e+07	5.60428e+07	8.43097e+07	4.50569e+07	4.81085e+07	3.5524e+07	4.87432e+07	4.83038e+07	3.38423e+07	3.5204e+07	3.38395e+07	3.76382e+07	4.59483e+07	4.41501e+07	4.9471e+07	4.0481e+07	4.50418e+07	4.01825e+07	4.40892e+07	4.49893e+07	4.71019e+07	4.37078e+07
666	MAC_01466	7.54784	104469000	149313000	267088000	134131000	143054000	247427000	192145000	321060000	268992000	135090000	130131000	256515000	137500000	117026000	200808000	91517600	130306000	192526000	3	8	1.35947e+08	1.62034e+08	1.89131e+08	1.74547e+08	1.55242e+08	1.75208e+08	2.50041e+08	3.48414e+08	1.90479e+08	1.75795e+08	1.41218e+08	1.81644e+08	1.78931e+08	1.26997e+08	1.42196e+08	1.19093e+08	1.41408e+08	1.36332e+08	1.57922e+08	1.71701e+08	1.61436e+08	1.85788e+08	1.56749e+08	1.83621e+08	2.00725e+08	1.94651e+08	1.84776e+08
667	MAC_01468	7.31639	48949200	86514000	99305800	52890200	98728700	88412900	73990600	172171000	93386800	60952900	89207500	105157000	68266600	75074400	75706300	44588500	81333100	81436400	3	9	6.76359e+07	7.11263e+07	8.74177e+07	7.30814e+07	8.11684e+07	7.78288e+07	1.02237e+08	1.41548e+08	8.22073e+07	8.42221e+07	7.33407e+07	9.25684e+07	9.43278e+07	6.17214e+07	6.66433e+07	6.16105e+07	6.68669e+07	7.16875e+07	7.85687e+07	7.53695e+07	7.4617e+07	7.77881e+07	8.19563e+07	8.15655e+07	8.20726e+07	7.90796e+07	7.97458e+07
668	MAC_01469	7.39849	59670100	112584000	157919000	68626600	132855000	131856000	87412000	228317000	147670000	79216500	122712000	147877000	82261600	103027000	115682000	56471300	99844000	115568000	3	9	8.96131e+07	9.45386e+07	1.25224e+08	1.03064e+08	1.1156e+08	1.04557e+08	1.31276e+08	1.91721e+08	1.17097e+08	1.18968e+08	1.03043e+08	1.17261e+08	1.23541e+08	8.65134e+07	9.17315e+07	8.48091e+07	8.38406e+07	9.16411e+07	1.04098e+08	1.00179e+08	1.06887e+08	1.09702e+08	1.12643e+08	1.09577e+08	1.05384e+08	1.0711e+08	1.13591e+08
669	MAC_01470	7.93651	251246000	319015000	489016000	284524000	323678000	438546000	467162000	788740000	567918000	334214000	317690000	529786000	351144000	278449000	391341000	224279000	266252000	392662000	3	16	3.00186e+08	3.34669e+08	3.90147e+08	3.39946e+08	3.39561e+08	3.49881e+08	5.58159e+08	8.27444e+08	4.53096e+08	3.99315e+08	3.33279e+08	4.22674e+08	4.19542e+08	2.92113e+08	3.1222e+08	2.67966e+08	2.79317e+08	3.13274e+08	3.48708e+08	3.54635e+08	3.33017e+08	3.61839e+08	3.42857e+08	3.66679e+08	4.48072e+08	4.62274e+08	4.3953e+08
670	MAC_01471	7.75857	44198000	148984000	255748000	49122600	151606000	179788000	59914100	234482000	174409000	54364200	131826000	234427000	62396400	113511000	168504000	44779100	135032000	201926000	3	10	9.82391e+07	1.15987e+08	1.47796e+08	1.09185e+08	1.18028e+08	1.03899e+08	1.33171e+08	1.82548e+08	1.0079e+08	1.20836e+08	1.02629e+08	1.35474e+08	1.38689e+08	8.83703e+07	9.73778e+07	9.95307e+07	1.05125e+08	1.16692e+08	1.14119e+08	1.22906e+08	1.26154e+08	1.16217e+08	1.19174e+08	1.08887e+08	1.06906e+08	1.01986e+08	9.77724e+07
671	MAC_01473	6.53321	20199000	24928400	16927600	21991500	26496600	13971800	34070700	59005800	16219500	26217900	25454400	17759800	26787000	23110500	13407300	18538100	23631000	12494100	3	4	1.8239e+07	1.90175e+07	2.45734e+07	1.98576e+07	2.02138e+07	2.02825e+07	3.07647e+07	4.50146e+07	2.35454e+07	2.36739e+07	1.94188e+07	2.57815e+07	2.41878e+07	1.76306e+07	1.9463e+07	1.67393e+07	1.80277e+07	1.81374e+07	2.11872e+07	2.0152e+07	2.09751e+07	2.11365e+07	2.041e+07	2.12563e+07	2.46969e+07	2.51486e+07	2.28404e+07
672	MAC_01474	7.98814	212029000	315543000	401255000	251737000	390035000	471121000	458770000	940594000	590394000	292636000	337377000	541716000	289022000	286189000	342591000	175493000	281552000	345528000	3	8	2.82084e+08	2.92956e+08	3.24857e+08	3.34912e+08	3.62116e+08	3.81421e+08	6.1035e+08	8.73266e+08	4.77985e+08	3.89324e+08	3.13227e+08	4.38575e+08	3.84516e+08	2.65704e+08	2.77363e+08	2.33477e+08	2.61398e+08	2.7974e+08	3.27681e+08	3.10433e+08	2.77288e+08	3.56482e+08	3.65631e+08	3.99734e+08	4.89969e+08	4.87874e+08	4.63673e+08
673	MAC_01475	7.61582	174033000	183268000	176847000	189758000	179201000	143502000	276598000	379953000	160434000	231117000	171030000	173712000	219493000	144093000	127134000	146768000	159521000	120748000	3	15	1.54341e+08	1.71625e+08	2.12938e+08	1.68286e+08	1.67817e+08	1.72788e+08	2.453e+08	3.55815e+08	1.93176e+08	2.04966e+08	1.60165e+08	2.09163e+08	1.94657e+08	1.34939e+08	1.5308e+08	1.30161e+08	1.49387e+08	1.4539e+08	1.79289e+08	1.81864e+08	1.81758e+08	1.79125e+08	1.69446e+08	1.81084e+08	1.96919e+08	1.98786e+08	1.87392e+08
674	MAC_01477	6.79523	27461500	35373200	24786600	28275700	34671200	18992100	33791200	56788600	17479500	31749200	30124500	23792600	34770700	27583500	17846700	26106500	33075600	20222000	3	5	2.53477e+07	2.79682e+07	3.39636e+07	2.60992e+07	2.74131e+07	2.60237e+07	3.11902e+07	4.49005e+07	2.39511e+07	2.93053e+07	2.38182e+07	3.26015e+07	3.20943e+07	2.18092e+07	2.44542e+07	2.4097e+07	2.61516e+07	2.7709e+07	2.94449e+07	2.96367e+07	2.89902e+07	2.77801e+07	2.76792e+07	2.72732e+07	2.50385e+07	2.50849e+07	2.32339e+07
675	MAC_01480	6.42152	14675500	23313400	8116180	16114000	24446100	7041660	25164300	55320800	7708830	18812800	23584200	8215610	19111700	21988500	6056270	13031600	22905500	6296730	3	3	1.26238e+07	1.30072e+07	1.69113e+07	1.38612e+07	1.36391e+07	1.46723e+07	2.16463e+07	3.08649e+07	1.60625e+07	1.61827e+07	1.31583e+07	1.71184e+07	1.64398e+07	1.2268e+07	1.26191e+07	1.12098e+07	1.27796e+07	1.31202e+07	1.46644e+07	1.37831e+07	1.44349e+07	1.47539e+07	1.37715e+07	1.53768e+07	1.73769e+07	1.72435e+07	1.55816e+07
676	MAC_01481	7.21693	80504400	122243000	112179000	97408500	146194000	107292000	146593000	297553000	130276000	111172000	129268000	119236000	120817000	112033000	91142100	76655100	121567000	93487200	3	13	9.18093e+07	9.87631e+07	1.21751e+08	1.11087e+08	1.18114e+08	1.16447e+08	1.67178e+08	2.404e+08	1.41393e+08	1.26783e+08	1.04439e+08	1.29411e+08	1.37783e+08	9.05142e+07	9.89194e+07	8.74194e+07	9.8217e+07	1.01465e+08	1.06649e+08	1.04655e+08	1.03923e+08	1.18242e+08	1.1926e+08	1.22038e+08	1.34205e+08	1.34306e+08	1.37159e+08
677	MAC_01489	7.43154	47043400	75869700	126833000	47878400	77211900	94606000	66709100	123433000	99952200	54820100	66762500	120842000	57937700	54626000	82021600	44297100	66982800	97179900	3	4	6.61076e+07	7.48441e+07	9.14935e+07	6.7281e+07	7.61682e+07	6.82459e+07	9.37427e+07	1.21764e+08	7.21025e+07	7.70358e+07	6.586e+07	8.71718e+07	8.14168e+07	5.38876e+07	5.91679e+07	6.22483e+07	6.60773e+07	7.01027e+07	7.67933e+07	7.93091e+07	7.80961e+07	7.16141e+07	7.69075e+07	7.15226e+07	7.52536e+07	6.8027e+07	6.99436e+07
678	MAC_01490	7.4638	74911300	134608000	147503000	79003200	129711000	123928000	94598100	193501000	114145000	94623200	120971000	147679000	98701400	98695000	113039000	72691000	105475000	126104000	3	7	9.81454e+07	1.17913e+08	1.28524e+08	1.03506e+08	1.13624e+08	1.07983e+08	1.23938e+08	1.69502e+08	9.94585e+07	1.23971e+08	1.05968e+08	1.28678e+08	1.29314e+08	8.64545e+07	9.84948e+07	9.52365e+07	9.23936e+07	1.09879e+08	1.1401e+08	1.24948e+08	1.09704e+08	1.10173e+08	1.14727e+08	1.13167e+08	9.94936e+07	9.46971e+07	9.64805e+07
679	MAC_01491	6.63143	8464970	32817800	56721200	10484200	36107100	48358100	13279400	68426100	54458200	11930800	32466300	56433900	11920800	27572700	42976100	8614360	30162500	41600500	3	9	2.12613e+07	2.43191e+07	3.04749e+07	2.6333e+07	2.67565e+07	2.59816e+07	3.33537e+07	5.0706e+07	2.92591e+07	2.99664e+07	2.40586e+07	3.03206e+07	2.99413e+07	2.04323e+07	2.309e+07	2.16366e+07	2.23514e+07	2.23509e+07	2.46981e+07	2.57699e+07	2.60125e+07	2.80289e+07	2.70163e+07	2.72291e+07	2.67752e+07	2.83283e+07	2.8383e+07
680	MAC_01492	6.43347	NA	16711800	12945500	NA	16432800	9900570	NA	30409500	10906900	NA	15635700	11678500	NA	15366900	9059810	NA	14821400	9485640	2	3	NA	16711800	2.15361e+07	NA	16432800	1.64705e+07	NA	30409500	1.81447e+07	NA	15635700	1.94283e+07	NA	15366900	1.50718e+07	NA	14821400	1.57803e+07	NA	1.77088e+07	1.83825e+07	NA	1.65923e+07	1.72613e+07	NA	1.69891e+07	1.76014e+07
681	MAC_01493	7.18527	14851000	NA	102832000	13519500	NA	58711400	14545400	NA	51173600	15885400	NA	69974600	17976500	NA	55340100	13042700	NA	56515000	2	3	3.07527e+07	NA	4.96593e+07	2.79955e+07	NA	2.83527e+07	3.01199e+07	NA	2.47126e+07	3.28947e+07	NA	3.37919e+07	3.72248e+07	NA	2.67247e+07	2.70082e+07	NA	2.72921e+07	3.57236e+07	NA	4.23877e+07	2.97985e+07	NA	2.9714e+07	2.41793e+07	NA	2.39727e+07
682	MAC_01496	6.27279	7550300	9824070	6841240	8507370	9246130	4086370	10744100	18725100	4049260	9015410	9583440	5904750	9784670	8863430	4355340	8361580	10247200	5382000	3	3	6.60294e+06	7.191e+06	1.06872e+07	7.43993e+06	6.76796e+06	6.38362e+06	9.39601e+06	1.37063e+07	6.32564e+06	7.88422e+06	7.01486e+06	9.22424e+06	8.55696e+06	6.48783e+06	6.80379e+06	7.31243e+06	7.50072e+06	8.40761e+06	7.67025e+06	7.61999e+06	9.12226e+06	7.91909e+06	6.83365e+06	6.69011e+06	7.54281e+06	7.65742e+06	6.13624e+06
683	MAC_01501	7.21281	27963300	71279300	81887400	32600300	86195900	76915000	47481400	163847000	91387200	39800400	77111500	87755700	38058500	67967000	64829800	26006600	73876800	66355000	3	8	4.95002e+07	5.10277e+07	6.46183e+07	5.77086e+07	6.17062e+07	6.06946e+07	8.40509e+07	1.17295e+08	7.21147e+07	7.04541e+07	5.52029e+07	6.92491e+07	6.73706e+07	4.86565e+07	5.1158e+07	4.60365e+07	5.28872e+07	5.23615e+07	5.75015e+07	5.40719e+07	5.51562e+07	6.14252e+07	6.23052e+07	6.36086e+07	6.74733e+07	6.55302e+07	6.99555e+07
684	MAC_01502	6.53286	17401100	27354200	16400800	21800800	30073000	13260000	30506200	63438600	18929900	23449200	25614000	15001100	24219700	22520900	12126100	18148900	24806700	11072100	3	3	1.6615e+07	1.9239e+07	2.44221e+07	2.0816e+07	2.11512e+07	1.97452e+07	2.91282e+07	4.46181e+07	2.81881e+07	2.23899e+07	1.8015e+07	2.23378e+07	2.31256e+07	1.58396e+07	1.80567e+07	1.73291e+07	1.74472e+07	1.64872e+07	1.93007e+07	2.03867e+07	2.08459e+07	2.21566e+07	2.13565e+07	2.06932e+07	2.33831e+07	2.49271e+07	2.73441e+07
685	MAC_01503	7.17112	73238500	203165000	104240000	62464800	147011000	92262000	78379100	260175000	85017000	84009100	178672000	85248400	93250500	175977000	63692900	50363100	146523000	86892200	3	13	1.05306e+08	1.16152e+08	1.26806e+08	8.98153e+07	8.40483e+07	1.12235e+08	1.12698e+08	1.48746e+08	1.03422e+08	1.20793e+08	1.02149e+08	1.03703e+08	1.34081e+08	1.00609e+08	7.74813e+07	7.24149e+07	8.37693e+07	1.05703e+08	1.22328e+08	1.23082e+08	1.08238e+08	9.55998e+07	8.48641e+07	1.17624e+08	9.04702e+07	8.31008e+07	1.00325e+08
686	MAC_01505	7.04216	22371200	45665100	35581500	20148200	41405900	27948500	23437300	72072500	33503000	25199900	40705200	34398400	25692900	37159100	28047600	16237900	37749700	26043000	3	5	3.1692e+07	3.18615e+07	3.59983e+07	2.85428e+07	2.88898e+07	2.82759e+07	3.32023e+07	5.02865e+07	3.38954e+07	3.56993e+07	2.84009e+07	3.48013e+07	3.63977e+07	2.59267e+07	2.83761e+07	2.30033e+07	2.63388e+07	2.63481e+07	3.68147e+07	3.37623e+07	3.0727e+07	3.03811e+07	2.91702e+07	2.96335e+07	2.66537e+07	2.80939e+07	3.28805e+07
687	MAC_01507	6.72814	18282000	33294800	27756000	17641800	35588000	21284200	17110700	45610500	18290400	17612600	28801300	23166200	22050300	30727800	18002200	17448700	37003700	19475300	3	3	2.37501e+07	2.27424e+07	3.12791e+07	2.29185e+07	2.43088e+07	2.39859e+07	2.22285e+07	3.11548e+07	2.06121e+07	2.28805e+07	1.9673e+07	2.61068e+07	2.86455e+07	2.0989e+07	2.02873e+07	2.26676e+07	2.52758e+07	2.19474e+07	2.75892e+07	2.40991e+07	2.66989e+07	2.43945e+07	2.45447e+07	2.51375e+07	1.78443e+07	1.74054e+07	1.99949e+07
688	MAC_01532	7.26643	94261300	83417100	218921000	97095200	91999100	129396000	130574000	215868000	137141000	102632000	91746800	173795000	110110000	81408100	124217000	88717900	85224500	122925000	3	11	1.05483e+08	9.53556e+07	1.71139e+08	1.08654e+08	1.05166e+08	1.01154e+08	1.46118e+08	2.46763e+08	1.07208e+08	1.1485e+08	1.04877e+08	1.35862e+08	1.23218e+08	9.30591e+07	9.7105e+07	9.92795e+07	9.74217e+07	9.6095e+07	1.22533e+08	1.01044e+08	1.46079e+08	1.15652e+08	1.06187e+08	1.0601e+08	1.17299e+08	1.37861e+08	1.03998e+08
689	MAC_01533	6.88425	36926900	69577500	48981200	46428600	66219100	42392900	59957400	121745000	41701900	49063700	57721900	49946200	51747300	52813100	38835800	36383200	57845200	43680700	3	11	4.1463e+07	5.28645e+07	5.74138e+07	5.21318e+07	5.03128e+07	4.96913e+07	6.73225e+07	9.2501e+07	4.88813e+07	5.50906e+07	4.38567e+07	5.8545e+07	5.81039e+07	4.0127e+07	4.55218e+07	4.08525e+07	4.39504e+07	5.12008e+07	4.81651e+07	5.60183e+07	4.90067e+07	5.54893e+07	5.08012e+07	5.20771e+07	5.40443e+07	5.16782e+07	4.74177e+07
690	MAC_01536	8.08353	523697000	664463000	777291000	526517000	457083000	667183000	715259000	1426790000	955707000	573865000	722103000	902143000	676858000	624711000	752056000	501181000	529399000	450256000	3	29	5.97184e+08	6.42285e+08	7.05178e+08	6.004e+08	4.41827e+08	6.05285e+08	8.15627e+08	1.37917e+09	8.67041e+08	6.54392e+08	6.98001e+08	8.18446e+08	7.71838e+08	6.03859e+08	6.82284e+08	5.71509e+08	5.11729e+08	4.08483e+08	6.93714e+08	6.80602e+08	6.01918e+08	6.39068e+08	4.46115e+08	6.34346e+08	6.54759e+08	7.70509e+08	8.4108e+08
691	MAC_01537	7.29618	73622400	142517000	116235000	81628200	124921000	95813900	103924000	243464000	101642000	98240600	114082000	113917000	91888300	98369800	85982800	68967100	108900000	97574300	3	10	9.00981e+07	1.12856e+08	1.19943e+08	9.98955e+07	9.89222e+07	9.88701e+07	1.27181e+08	1.92794e+08	1.04884e+08	1.20225e+08	9.0339e+07	1.17551e+08	1.12452e+08	7.78969e+07	8.87254e+07	8.4401e+07	8.62355e+07	1.00687e+08	1.04662e+08	1.19589e+08	1.02379e+08	1.06329e+08	9.98824e+07	1.03617e+08	1.02097e+08	1.07709e+08	1.01744e+08
692	MAC_01540	6.87216	13167000	30038900	46978000	15469000	34224500	35279000	22773900	55384700	37345000	18603100	30032200	41044500	19158300	26705000	35314700	12692100	27295500	34677400	3	4	2.18095e+07	2.51887e+07	3.38231e+07	2.56225e+07	2.86985e+07	2.54001e+07	3.77221e+07	4.64421e+07	2.68876e+07	3.08137e+07	2.51831e+07	2.95511e+07	3.17333e+07	2.23931e+07	2.54258e+07	2.10229e+07	2.28883e+07	2.4967e+07	2.53348e+07	2.66914e+07	2.88704e+07	2.72727e+07	2.89771e+07	2.66196e+07	3.02821e+07	2.59461e+07	2.60825e+07
693	MAC_01541	7.12012	38850400	83598100	97241600	41795700	72240100	81401400	52467500	142206000	83907600	46492000	66873800	92696600	50434900	57166300	70561300	31177200	59373300	87399600	3	8	5.91085e+07	7.1647e+07	7.45755e+07	6.35896e+07	6.19127e+07	6.24275e+07	7.98261e+07	1.21876e+08	6.43495e+07	7.07347e+07	5.73136e+07	7.10899e+07	7.67336e+07	4.89939e+07	5.41141e+07	4.74342e+07	5.08854e+07	6.70276e+07	6.86629e+07	7.59213e+07	6.36554e+07	6.7685e+07	6.25137e+07	6.54248e+07	6.40818e+07	6.80895e+07	6.24228e+07
694	MAC_01542	6.47212	10660700	17948800	12942100	12246200	21425900	12338400	16470600	42830600	14879600	14115500	19076100	14119300	15989500	17261200	10379800	10238100	18418900	11940000	3	3	1.24707e+07	1.27328e+07	1.55958e+07	1.43254e+07	1.51995e+07	1.48684e+07	1.92671e+07	3.03839e+07	1.79306e+07	1.65121e+07	1.35325e+07	1.70144e+07	1.87043e+07	1.2245e+07	1.25082e+07	1.19764e+07	1.30663e+07	1.43883e+07	1.44865e+07	1.34924e+07	1.33121e+07	1.52481e+07	1.5347e+07	1.55822e+07	1.5467e+07	1.69748e+07	1.73938e+07
695	MAC_01544	7.29021	113286000	77462400	120125000	112595000	76622000	112390000	194844000	170973000	129623000	139130000	70871100	140586000	129143000	60405700	104119000	91582300	62495400	102771000	3	7	9.50842e+07	1.02175e+08	1.08505e+08	9.45043e+07	1.01066e+08	1.01518e+08	1.63538e+08	2.25517e+08	1.17084e+08	1.16776e+08	9.34805e+07	1.26987e+08	1.08393e+08	7.96765e+07	9.40471e+07	7.68677e+07	8.24328e+07	9.28295e+07	1.10454e+08	1.0827e+08	9.26164e+07	1.00591e+08	1.02047e+08	1.06392e+08	1.31283e+08	1.25991e+08	1.13578e+08
696	MAC_01545	6.88677	18424600	19880600	44627700	33663100	26496400	41970100	64183000	92232600	51395700	35032900	33885800	67782600	33899400	21686100	51727700	13869200	15291200	16794000	3	5	2.05599e+07	2.28724e+07	3.47615e+07	3.75645e+07	3.04838e+07	3.26915e+07	7.16215e+07	1.06112e+08	4.00333e+07	3.90931e+07	3.89852e+07	5.27974e+07	3.78282e+07	2.49496e+07	4.02919e+07	1.54766e+07	1.75923e+07	1.30812e+07	2.38833e+07	2.42369e+07	2.96714e+07	3.99838e+07	3.07797e+07	3.42611e+07	5.74955e+07	5.92826e+07	3.88346e+07
697	MAC_01550	6.63162	22180900	9923210	22167600	24112700	13742300	18758800	32507100	24735600	21002900	27580700	10178200	18900500	29596300	9444760	14741900	21019900	10533600	16226900	3	4	1.54648e+07	1.45731e+07	2.16498e+07	1.68117e+07	2.01818e+07	1.83206e+07	2.26644e+07	3.63264e+07	2.05123e+07	1.92296e+07	1.49476e+07	1.8459e+07	2.06349e+07	1.38705e+07	1.43975e+07	1.46554e+07	1.54695e+07	1.58478e+07	1.79646e+07	1.54425e+07	1.84796e+07	1.78944e+07	2.03777e+07	1.92002e+07	1.81942e+07	2.02947e+07	1.98981e+07
698	MAC_01551	7.55031	124499000	157194000	99410900	142615000	172188000	80906000	189652000	321217000	96085100	152942000	154394000	94139900	169280000	139145000	68601000	130960000	153519000	74001200	3	18	1.08293e+08	1.17277e+08	1.53188e+08	1.2405e+08	1.28463e+08	1.24673e+08	1.64964e+08	2.39649e+08	1.48063e+08	1.33033e+08	1.15188e+08	1.45066e+08	1.47244e+08	1.03811e+08	1.05711e+08	1.13913e+08	1.14535e+08	1.14033e+08	1.25797e+08	1.24273e+08	1.30756e+08	1.3204e+08	1.2971e+08	1.30659e+08	1.32428e+08	1.33886e+08	1.4363e+08
699	MAC_01553	7.77073	90450700	221951000	269767000	102572000	244387000	230954000	153367000	535211000	279696000	123135000	230706000	274262000	126003000	196882000	197847000	84001900	209198000	181019000	3	15	1.53561e+08	1.63701e+08	2.1544e+08	1.7414e+08	1.80248e+08	1.84443e+08	2.60376e+08	3.94747e+08	2.23369e+08	2.0905e+08	1.70158e+08	2.1903e+08	2.1392e+08	1.45211e+08	1.58003e+08	1.42613e+08	1.54295e+08	1.44564e+08	1.78383e+08	1.73467e+08	1.83893e+08	1.85355e+08	1.81998e+08	1.93299e+08	2.09022e+08	2.20536e+08	2.16681e+08
700	MAC_01555	6.7818	12768800	25541700	36277900	14571200	30872200	34536600	21663700	59611900	40398600	16994100	24279500	37760100	18398000	22424500	29065600	12071200	22365400	32159700	3	6	2.03548e+07	2.22426e+07	2.6133e+07	2.3228e+07	2.68845e+07	2.48787e+07	3.45342e+07	5.1912e+07	2.91014e+07	2.70904e+07	2.11434e+07	2.72008e+07	2.93284e+07	1.9528e+07	2.09376e+07	1.92428e+07	1.94765e+07	2.31665e+07	2.3645e+07	2.35695e+07	2.23064e+07	2.4724e+07	2.71455e+07	2.60732e+07	2.7723e+07	2.90021e+07	2.82301e+07
701	MAC_01557	6.47105	19937900	34819700	18259800	22673500	37155300	15193100	31266100	79220100	18044400	27280000	35290200	18414700	28823600	28851000	13297100	20025400	32141200	13288900	3	4	2.00468e+07	2.2276e+07	2.8387e+07	2.27973e+07	2.37702e+07	2.36194e+07	3.14368e+07	5.06813e+07	2.80521e+07	2.74289e+07	2.2577e+07	2.86278e+07	2.8981e+07	1.84575e+07	2.06719e+07	2.01347e+07	2.05624e+07	2.06591e+07	2.32871e+07	2.36049e+07	2.42302e+07	2.42655e+07	2.4001e+07	2.47535e+07	2.52364e+07	2.83145e+07	2.72122e+07
702	MAC_01559	6.48823	5209970	8904680	24957200	5312050	9894080	21308400	6475760	16099100	20696600	6450320	8551900	25739500	6657790	8357400	18220100	5263150	9867020	21570600	3	3	9.66634e+06	9.68167e+06	1.23719e+07	9.85573e+06	1.07574e+07	1.05631e+07	1.20148e+07	1.75038e+07	1.02598e+07	1.19676e+07	9.29811e+06	1.27597e+07	1.23526e+07	9.08663e+06	9.03217e+06	9.76501e+06	1.0728e+07	1.06931e+07	1.12288e+07	1.02593e+07	1.05603e+07	1.04905e+07	1.08618e+07	1.10703e+07	9.64512e+06	9.779e+06	9.95263e+06
703	MAC_01560	7.07392	46912900	57086600	31569300	48278100	55826200	23606500	63140200	87850500	23083900	54554300	48888900	29472300	56602600	42185900	20851200	44314200	47861200	25892600	3	5	3.77232e+07	4.33375e+07	5.17154e+07	3.8821e+07	4.23806e+07	3.86711e+07	5.07717e+07	6.6692e+07	3.7815e+07	4.38677e+07	3.71142e+07	4.82801e+07	4.55148e+07	3.20256e+07	3.41575e+07	3.56335e+07	3.6334e+07	4.2416e+07	4.38208e+07	4.59229e+07	4.41426e+07	4.13212e+07	4.2792e+07	4.05278e+07	4.07579e+07	3.72593e+07	3.66827e+07
704	MAC_01561	8.63931	139181000	141669000	301046000	161554000	151526000	192685000	195514000	244096000	209467000	164087000	137569000	210288000	191758000	128950000	154027000	166730000	126006000	185784000	3	6	1.42913e+08	1.62858e+08	2.55039e+08	1.65886e+08	1.74189e+08	1.63238e+08	2.00756e+08	2.80605e+08	1.77456e+08	1.68487e+08	1.58145e+08	1.78151e+08	1.96899e+08	1.48237e+08	1.30488e+08	1.712e+08	1.44852e+08	1.57392e+08	1.66013e+08	1.72574e+08	2.17694e+08	1.76569e+08	1.7588e+08	1.71076e+08	1.61161e+08	1.56767e+08	1.72142e+08
705	MAC_01563	6.40695	5113520	11584200	NA	6773940	14639500	NA	12934900	65893300	NA	6961630	15988100	NA	8376740	13518800	NA	5811580	12733700	NA	2	2	1.2392e+07	11584200	NA	1.64158e+07	14639500	NA	3.13461e+07	6.58933e+07	NA	1.68706e+07	15988100	NA	2.02999e+07	13518800	NA	1.40836e+07	12733700	NA	1.4395e+07	1.22753e+07	NA	1.7473e+07	1.47816e+07	NA	2.51636e+07	3.68131e+07	NA
706	MAC_01567	6.81671	4227120	26943200	73492100	3873640	28189200	58322300	5175810	50961400	62573200	4723330	22901100	72517800	5099760	20623200	50016200	3732800	20609400	59030800	3	7	1.85733e+07	1.9541e+07	2.30621e+07	1.70202e+07	2.04447e+07	1.83017e+07	2.27417e+07	3.69607e+07	1.96357e+07	2.07536e+07	1.66094e+07	2.27563e+07	2.24075e+07	1.49573e+07	1.56952e+07	1.64013e+07	1.49473e+07	1.8524e+07	2.15755e+07	2.07068e+07	1.96851e+07	1.81163e+07	2.06432e+07	1.91804e+07	1.82563e+07	2.06491e+07	1.90477e+07
707	MAC_01572	7.55798	20901700	38445200	112497000	21642400	39453700	100004000	28876200	63680300	104893000	26257800	34480400	113512000	27061200	30610400	83122400	19017200	31818600	95325700	3	3	3.98446e+07	4.51145e+07	5.02897e+07	4.12565e+07	4.6298e+07	4.47049e+07	5.50462e+07	7.47273e+07	4.68905e+07	5.00548e+07	4.04619e+07	5.07434e+07	5.15863e+07	3.59206e+07	3.71583e+07	3.62522e+07	3.73384e+07	4.26136e+07	4.62851e+07	4.7806e+07	4.29257e+07	4.39136e+07	4.67474e+07	4.68513e+07	4.41893e+07	4.17484e+07	4.54865e+07
708	MAC_01579	7.44812	78500400	133296000	207211000	96435400	141060000	157126000	123892000	230093000	157353000	114345000	121512000	186271000	108944000	104045000	136731000	77324600	133389000	159136000	3	7	1.04932e+08	1.25792e+08	1.64264e+08	1.28905e+08	1.33119e+08	1.2456e+08	1.65607e+08	2.17139e+08	1.2474e+08	1.52845e+08	1.14671e+08	1.47664e+08	1.45626e+08	9.81876e+07	1.08392e+08	1.0336e+08	1.2588e+08	1.26153e+08	1.21893e+08	1.33296e+08	1.40211e+08	1.37207e+08	1.34411e+08	1.3054e+08	1.32944e+08	1.21311e+08	1.21005e+08
709	MAC_01580	7.3832	85969000	179756000	126034000	84202200	221226000	74882500	109866000	498958000	97826200	89302200	211167000	96331300	99783700	186104000	75719300	70891600	253906000	87140400	3	4	1.20862e+08	9.33324e+07	1.7266e+08	1.18378e+08	1.14864e+08	1.02585e+08	1.54458e+08	2.59068e+08	1.34016e+08	1.25548e+08	1.09642e+08	1.31968e+08	1.40284e+08	9.66284e+07	1.03731e+08	9.9665e+07	1.31832e+08	1.19377e+08	1.40398e+08	9.89004e+07	1.47377e+08	1.26002e+08	1.15979e+08	1.0751e+08	1.23994e+08	1.44735e+08	1.30004e+08
710	MAC_01582	6.95245	60617800	106439000	53621800	65443800	105732000	44448300	86428400	175702000	45379800	75043600	94061000	53915300	80978000	80484000	38628100	58014800	88509700	42460000	3	7	6.01402e+07	7.08528e+07	8.11934e+07	6.49281e+07	7.03822e+07	6.7303e+07	8.57474e+07	1.16959e+08	6.87135e+07	7.44523e+07	6.26132e+07	8.16378e+07	8.03399e+07	5.35754e+07	5.84902e+07	5.75577e+07	5.89179e+07	6.42924e+07	6.98613e+07	7.50797e+07	6.93042e+07	6.91097e+07	7.10653e+07	7.05344e+07	6.88352e+07	6.53422e+07	6.66561e+07
711	MAC_01583	7.11077	48580600	64674800	33780800	48427300	57779800	26588500	71973100	143093000	33220700	55022800	56481000	39265000	57952300	45394700	27153200	43362100	50128900	27577700	3	4	4.29741e+07	4.78115e+07	5.16569e+07	4.28385e+07	4.27143e+07	4.06586e+07	6.36669e+07	1.05783e+08	5.08004e+07	4.86728e+07	4.17542e+07	6.00433e+07	5.12642e+07	3.35585e+07	4.15221e+07	3.83578e+07	3.70583e+07	4.21713e+07	4.99205e+07	5.06638e+07	4.40928e+07	4.55974e+07	4.31289e+07	4.26107e+07	5.11098e+07	5.90985e+07	4.92794e+07
712	MAC_01585	7.51948	43860800	125102000	148999000	51374600	133357000	146197000	75738900	262239000	160934000	59293600	110589000	159528000	55727700	90288600	116047000	40468700	114484000	142916000	3	8	8.26152e+07	9.59681e+07	1.03119e+08	9.67681e+07	1.02301e+08	1.01179e+08	1.4266e+08	2.01169e+08	1.11379e+08	1.11684e+08	8.48349e+07	1.10405e+08	1.04967e+08	6.92621e+07	8.03133e+07	7.62259e+07	8.78229e+07	9.89087e+07	9.59693e+07	1.01693e+08	8.80189e+07	1.03e+08	1.03294e+08	1.06037e+08	1.14523e+08	1.12388e+08	1.08044e+08
713	MAC_01590	7.09273	11537700	33364300	61990300	11563800	33569600	51470800	12179200	48067900	44800000	11553300	31341100	62821300	13655000	23940100	43238100	14893200	22629200	58019100	3	5	2.5339e+07	2.94052e+07	3.20267e+07	2.53963e+07	2.95861e+07	2.65919e+07	2.67478e+07	4.2364e+07	2.31455e+07	2.53732e+07	2.7622e+07	3.24561e+07	2.99889e+07	2.10993e+07	2.23386e+07	3.27083e+07	1.99439e+07	2.99751e+07	2.94348e+07	3.11594e+07	2.7337e+07	2.70319e+07	2.98733e+07	2.78687e+07	2.14723e+07	2.36678e+07	2.24525e+07
714	MAC_01591	6.39806	12197500	5367780	17799600	14308700	5279800	13586200	15521700	6602650	14880600	15252800	5830850	19347900	17031000	5328030	15010000	12892400	5147350	16222900	3	2	9.19354e+06	1.04864e+07	1.20883e+07	1.07848e+07	1.03145e+07	9.22686e+06	1.16991e+07	1.28988e+07	1.01059e+07	1.14964e+07	1.13911e+07	1.31398e+07	1.28367e+07	1.04088e+07	1.01938e+07	9.7173e+06	1.00558e+07	1.10175e+07	1.06796e+07	1.1112e+07	1.03182e+07	1.14794e+07	1.04147e+07	9.66986e+06	9.39164e+06	7.20628e+06	9.80334e+06
715	MAC_01592	7.32795	85259200	83998100	185727000	85576900	87458800	147243000	109309000	161234000	163616000	96399800	81502100	176052000	114094000	76091400	124026000	80023000	81280000	129856000	3	12	9.92366e+07	1.00442e+08	1.33444e+08	9.96064e+07	1.0458e+08	1.05793e+08	1.27229e+08	1.92798e+08	1.17557e+08	1.12204e+08	9.74573e+07	1.26492e+08	1.32799e+08	9.09874e+07	8.9112e+07	9.3142e+07	9.71918e+07	9.33008e+07	1.15277e+08	1.06434e+08	1.13904e+08	1.06021e+08	1.05595e+08	1.10873e+08	1.02135e+08	1.07712e+08	1.14037e+08
716	MAC_01593	7.39205	94762800	52873000	129240000	105396000	65719200	115632000	141161000	103827000	126038000	115569000	50784500	137051000	134161000	45100100	94890300	87302700	50518200	105848000	3	7	7.7948e+07	8.22396e+07	1.01014e+08	8.66945e+07	1.02221e+08	9.03782e+07	1.16113e+08	1.61494e+08	9.85115e+07	9.50624e+07	7.89911e+07	1.07119e+08	1.10355e+08	7.01495e+07	7.41664e+07	7.18117e+07	7.85769e+07	8.2731e+07	9.05477e+07	8.71458e+07	8.62226e+07	9.22779e+07	1.03213e+08	9.47174e+07	9.3212e+07	9.02232e+07	9.55619e+07
717	MAC_01594	6.57698	32461800	2495710	61354500	36618400	2991500	49089900	52853400	5149140	51574700	40092500	2745270	63454600	40844200	2386180	49405000	32608200	2359580	44002900	3	6	1.51711e+07	1.55642e+07	2.10509e+07	1.71137e+07	1.86561e+07	1.68429e+07	2.47012e+07	3.21119e+07	1.76954e+07	1.87373e+07	1.71205e+07	2.17714e+07	1.90886e+07	1.48811e+07	1.6951e+07	1.52395e+07	1.47152e+07	1.50975e+07	1.76234e+07	1.64927e+07	1.79684e+07	1.82159e+07	1.88372e+07	1.76515e+07	1.98293e+07	1.79402e+07	1.71656e+07
718	MAC_01595	6.6948	19075900	22126000	50923200	22047100	29285800	39651800	33799400	59532800	48407400	24851500	23104900	49475300	26711100	19239300	38468300	19165400	21730200	42286500	3	7	2.4488e+07	2.51793e+07	3.48582e+07	2.83022e+07	3.33272e+07	2.71427e+07	4.33888e+07	6.77482e+07	3.31361e+07	3.19023e+07	2.62933e+07	3.38671e+07	3.42895e+07	2.18943e+07	2.63325e+07	2.46029e+07	2.47289e+07	2.89462e+07	2.84463e+07	2.66815e+07	2.97539e+07	3.0125e+07	3.36507e+07	2.84459e+07	3.48312e+07	3.78494e+07	3.21439e+07
719	MAC_01598	7.47217	56125400	118806000	133270000	56832100	134373000	111898000	73729000	239532000	123739000	64184900	110293000	124212000	76607400	101807000	93908200	49380600	114194000	105472000	3	13	8.81964e+07	8.88842e+07	1.13359e+08	8.93069e+07	1.00531e+08	9.51798e+07	1.15859e+08	1.79205e+08	1.05252e+08	1.00861e+08	8.25152e+07	1.05654e+08	1.20382e+08	7.61665e+07	7.98778e+07	7.75975e+07	8.54338e+07	8.97139e+07	1.02453e+08	9.41868e+07	9.67595e+07	9.50586e+07	1.01506e+08	9.97496e+07	9.30079e+07	1.00118e+08	1.021e+08
720	MAC_01599	8.00593	100350000	152845000	213152000	113881000	167682000	177498000	170323000	319968000	238752000	137867000	154532000	208878000	137896000	149974000	156597000	91945700	116337000	162559000	3	8	1.28987e+08	1.43818e+08	1.76237e+08	1.4638e+08	1.57779e+08	1.46758e+08	2.18929e+08	3.0107e+08	1.97404e+08	1.77211e+08	1.45405e+08	1.72703e+08	1.77248e+08	1.41116e+08	1.29477e+08	1.18185e+08	1.09466e+08	1.34406e+08	1.49837e+08	1.52398e+08	1.50431e+08	1.55807e+08	1.5931e+08	1.53804e+08	1.75749e+08	1.68201e+08	1.91493e+08
721	MAC_01604	7.76654	280074000	321965000	269057000	290514000	320957000	208628000	336040000	441837000	212803000	338118000	267355000	253893000	379153000	231849000	187817000	263101000	261208000	229709000	3	11	2.48211e+08	2.96049e+08	3.30172e+08	2.57464e+08	2.95123e+08	2.56017e+08	2.97811e+08	4.06273e+08	2.6114e+08	2.99652e+08	2.45835e+08	3.11563e+08	3.36019e+08	2.13187e+08	2.30478e+08	2.33169e+08	2.40183e+08	2.81886e+08	2.88333e+08	3.13711e+08	2.81824e+08	2.74045e+08	2.97987e+08	2.68308e+08	2.39073e+08	2.26975e+08	2.53321e+08
722	MAC_01605	6.49506	14724200	36826100	19241000	16818500	42424600	15823700	20059200	72941600	16295000	17855600	36656400	19236400	19831100	33401300	13418400	13275900	35082100	15353700	3	7	1.96268e+07	2.01405e+07	2.63934e+07	2.24185e+07	2.32023e+07	2.17058e+07	2.67382e+07	3.98923e+07	2.23523e+07	2.38009e+07	2.00477e+07	2.63871e+07	2.64342e+07	1.82674e+07	1.84064e+07	1.76963e+07	1.91867e+07	2.10611e+07	2.27994e+07	2.1342e+07	2.25286e+07	2.38623e+07	2.34276e+07	2.27479e+07	2.14646e+07	2.22869e+07	2.1683e+07
723	MAC_01607	7.45145	52991000	80740100	59116600	49638000	80465500	39607400	55977500	116507000	43416800	61100200	71235700	62549100	70320400	61197600	46154700	45716200	69416500	42724300	3	3	5.675e+07	6.12444e+07	7.27727e+07	5.31592e+07	6.10361e+07	4.87568e+07	5.99484e+07	8.83749e+07	5.34462e+07	6.54345e+07	5.4035e+07	7.69981e+07	7.53087e+07	4.64207e+07	5.68165e+07	4.89592e+07	5.2655e+07	5.25937e+07	6.59232e+07	6.48981e+07	6.21165e+07	5.65828e+07	6.16286e+07	5.10977e+07	4.81246e+07	4.9373e+07	5.18459e+07
724	MAC_01608	7.19549	38343800	67138600	57165500	37415200	54207500	41708100	56285800	97716500	44117500	46124800	50835400	61969600	51247700	42884600	45580000	38862800	48614200	40251800	3	5	4.30961e+07	5.75516e+07	5.93344e+07	4.20524e+07	4.6467e+07	4.32905e+07	6.32618e+07	8.37631e+07	4.57914e+07	5.18414e+07	4.35764e+07	6.43208e+07	5.75992e+07	3.67609e+07	4.73094e+07	4.36794e+07	4.16724e+07	4.1779e+07	5.00622e+07	6.0985e+07	5.0646e+07	4.47607e+07	4.6918e+07	4.5369e+07	5.07845e+07	4.67965e+07	4.44203e+07
725	MAC_01610	6.68123	27466900	44039300	29730400	32926200	46881100	31040500	46816700	116764000	37106100	34849100	41389300	36599800	34074200	37847000	25999600	24014300	38832000	26297300	3	6	3.09587e+07	3.27399e+07	3.54806e+07	3.7112e+07	3.48525e+07	3.70441e+07	5.27684e+07	8.68052e+07	4.42829e+07	3.92794e+07	3.07698e+07	4.36787e+07	3.84059e+07	2.81364e+07	3.10283e+07	2.70672e+07	2.88686e+07	3.13835e+07	3.59629e+07	3.4693e+07	3.02852e+07	3.95021e+07	3.51908e+07	3.88227e+07	4.23607e+07	4.8496e+07	4.2957e+07
726	MAC_01611	7.19097	39555400	35168700	106512000	38079900	39984100	82364400	32843300	49627200	76231900	46458600	49824700	87726500	52750200	46710700	77811300	32992900	45969800	85948100	3	3	5.28335e+07	4.23338e+07	6.62467e+07	5.08627e+07	4.81302e+07	5.12278e+07	4.38683e+07	5.97379e+07	4.74136e+07	6.2054e+07	5.99757e+07	5.45628e+07	7.04576e+07	5.62273e+07	4.83959e+07	4.40681e+07	5.53354e+07	5.34567e+07	6.13736e+07	4.48593e+07	5.65462e+07	5.41384e+07	4.85974e+07	5.36873e+07	3.5216e+07	3.33742e+07	4.59939e+07
727	MAC_01615	7.47134	76870400	106098000	110547000	82818700	115051000	95156100	105901000	197181000	94455000	96836400	103151000	106935000	98304600	89578700	74287100	79445600	107218000	90841100	3	10	8.53499e+07	9.10951e+07	1.15962e+08	9.19544e+07	9.8782e+07	9.98171e+07	1.17583e+08	1.69298e+08	9.90817e+07	1.07518e+08	8.85648e+07	1.12173e+08	1.09149e+08	7.69117e+07	7.79259e+07	8.82092e+07	9.20567e+07	9.52907e+07	9.9146e+07	9.65296e+07	9.89815e+07	9.78766e+07	9.97409e+07	1.0461e+08	9.43917e+07	9.45831e+07	9.6115e+07
728	MAC_01617	6.79601	NA	25520100	19191500	NA	29359800	16106700	NA	50012500	20140200	NA	26683100	19589200	NA	23414200	14190100	NA	25025400	14047200	2	3	NA	25520100	3.26174e+07	NA	29359800	2.73745e+07	NA	50012500	3.42297e+07	NA	26683100	3.32933e+07	NA	23414200	2.41171e+07	NA	25025400	2.38742e+07	NA	2.70426e+07	2.78412e+07	NA	2.96448e+07	2.86888e+07	NA	2.79408e+07	3.32048e+07
729	MAC_01619	7.02642	40603200	58186200	97064100	47343100	63482400	92517000	64716300	124484000	101962000	52877500	53491800	108484000	56617800	47663700	77931000	38239200	59118500	84800200	3	7	5.48483e+07	6.0379e+07	6.92453e+07	6.39528e+07	6.58748e+07	6.60014e+07	8.74211e+07	1.29175e+08	7.27394e+07	7.14289e+07	5.55077e+07	7.73922e+07	7.64814e+07	4.94599e+07	5.55958e+07	5.16549e+07	6.13464e+07	6.04962e+07	6.37141e+07	6.3981e+07	5.91056e+07	6.80716e+07	6.65142e+07	6.91703e+07	7.01789e+07	7.21672e+07	7.05614e+07
730	MAC_01622	6.93314	16362400	33060700	42792500	19185400	26708900	27503100	25607800	35370800	26548700	22697500	27204400	36403800	22862900	28380200	26467400	18636500	26117200	27920000	3	4	2.09778e+07	2.99091e+07	3.68947e+07	2.45971e+07	2.41628e+07	2.37125e+07	3.28311e+07	3.1999e+07	2.28896e+07	2.90999e+07	2.46111e+07	3.13865e+07	2.93119e+07	2.56748e+07	2.28196e+07	2.38934e+07	2.36275e+07	2.4072e+07	2.43687e+07	3.16934e+07	3.14921e+07	2.61812e+07	2.43973e+07	2.4851e+07	2.63557e+07	1.78771e+07	2.22043e+07
731	MAC_01626	6.69129	14281200	18789300	40660500	15945600	18851700	31878500	19160100	33929200	35988300	19402900	17809300	40757500	16594900	14651300	29660700	13270400	17605200	33872800	3	8	1.9618e+07	2.15388e+07	2.58209e+07	2.19044e+07	2.16104e+07	2.0244e+07	2.63201e+07	3.88942e+07	2.28539e+07	2.66536e+07	2.04154e+07	2.58825e+07	2.27963e+07	1.67953e+07	1.88356e+07	1.82295e+07	2.01814e+07	2.15105e+07	2.27891e+07	2.28238e+07	2.20399e+07	2.33151e+07	2.18201e+07	2.1216e+07	2.11289e+07	2.17293e+07	2.21696e+07
732	MAC_01630	6.9047	18616400	63646200	100022000	21259900	63131500	66587700	23027700	92484600	64443600	18451500	56221200	76705900	25749300	59204900	58124100	18223900	59957400	67877400	3	8	4.10918e+07	4.48875e+07	6.42515e+07	4.69268e+07	4.45245e+07	4.27742e+07	5.08289e+07	6.52262e+07	4.13969e+07	4.07278e+07	3.96509e+07	4.92738e+07	5.68362e+07	4.17552e+07	3.73374e+07	4.02255e+07	4.22859e+07	4.36026e+07	4.7734e+07	4.75653e+07	5.48431e+07	4.99491e+07	4.49567e+07	4.48279e+07	4.08038e+07	3.64404e+07	4.01573e+07
733	MAC_01635	6.38715	4536670	NA	12175600	5476750	NA	10584500	6851380	NA	9446950	6510970	NA	11575900	6467860	NA	8334300	4567460	NA	9616000	2	4	6.09373e+06	NA	9.06451e+06	7.35646e+06	NA	7.87997e+06	9.20289e+06	NA	7.03308e+06	8.74564e+06	NA	8.61805e+06	8.68774e+06	NA	6.20473e+06	6.13509e+06	NA	7.15894e+06	7.07873e+06	NA	7.73719e+06	7.83024e+06	NA	8.2583e+06	7.38778e+06	NA	6.8225e+06
734	MAC_01636	7.23744	39560800	55532100	45650100	46236000	64378800	35310600	61349700	113948000	34832200	50434100	51006800	42260900	55452100	47750600	33715000	40241200	54790100	36357800	3	7	3.95418e+07	4.35191e+07	5.82792e+07	4.62138e+07	5.04521e+07	4.50793e+07	6.13203e+07	8.92983e+07	4.44686e+07	5.04099e+07	3.99728e+07	5.39524e+07	5.54255e+07	3.7421e+07	4.30423e+07	4.02219e+07	4.29377e+07	4.64162e+07	4.59334e+07	4.61154e+07	4.97454e+07	4.91902e+07	5.09418e+07	4.72437e+07	4.92259e+07	4.98889e+07	4.31371e+07
735	MAC_01637	7.25339	66974300	115727000	82838300	66417300	118092000	68840300	74027100	184219000	66486200	80036700	102882000	81646200	84367100	90987500	61100100	57793100	105442000	71645800	3	5	7.91874e+07	8.35183e+07	9.70815e+07	7.85288e+07	8.52251e+07	8.06767e+07	8.75263e+07	1.32948e+08	7.79178e+07	9.46318e+07	7.42483e+07	9.56844e+07	9.97519e+07	6.56642e+07	7.16056e+07	6.8332e+07	7.60958e+07	8.39646e+07	9.19874e+07	8.85008e+07	8.28658e+07	8.35864e+07	8.60523e+07	8.45502e+07	7.02633e+07	7.42749e+07	7.55848e+07
736	MAC_01638	7.82976	50373800	82508900	180218000	54950500	99674000	158848000	81283500	188845000	187659000	62554900	83908600	184576000	66683900	80665400	146093000	43301700	78380000	141788000	3	6	8.4142e+07	8.3462e+07	1.0666e+08	9.17867e+07	1.00825e+08	9.40125e+07	1.35772e+08	1.91026e+08	1.11064e+08	1.04489e+08	8.48779e+07	1.09239e+08	1.11386e+08	8.15972e+07	8.64636e+07	7.23291e+07	7.92854e+07	8.39157e+07	9.77429e+07	8.84412e+07	9.10418e+07	9.76981e+07	1.01804e+08	9.85262e+07	1.08993e+08	1.06722e+08	1.07738e+08
737	MAC_01639	6.88326	19508100	28565900	NA	23451700	31994400	NA	30752200	59023800	NA	24834500	27100100	NA	26337900	28371500	NA	20407800	32349200	NA	2	2	2.70734e+07	28565900	NA	3.25463e+07	31994400	NA	4.2678e+07	5.90238e+07	NA	3.44654e+07	27100100	NA	3.65518e+07	28371500	NA	2.8322e+07	32349200	NA	3.14496e+07	3.02701e+07	NA	3.46425e+07	3.2305e+07	NA	3.42605e+07	3.29752e+07	NA
738	MAC_01640	6.49269	13231300	16802500	9954990	16142900	22327100	8523000	23941500	39855700	9999410	16725200	20259800	9821000	21331100	18293200	7483760	13362800	19473400	8405730	3	3	1.16105e+07	1.15066e+07	1.6566e+07	1.41655e+07	1.529e+07	1.4183e+07	2.10088e+07	2.72939e+07	1.66399e+07	1.46764e+07	1.38743e+07	1.6343e+07	1.87181e+07	1.25275e+07	1.24536e+07	1.17259e+07	1.33357e+07	1.39879e+07	1.34873e+07	1.21931e+07	1.41402e+07	1.50778e+07	1.54384e+07	1.4864e+07	1.68652e+07	1.52485e+07	1.61416e+07
739	MAC_01641	8.28055	314240000	462778000	745354000	360913000	437742000	435032000	407132000	705082000	506107000	415429000	418913000	705406000	454910000	355614000	501583000	312479000	412820000	444668000	3	15	3.79949e+08	4.60428e+08	6.19598e+08	4.36382e+08	4.35519e+08	3.61633e+08	4.92265e+08	7.01501e+08	4.20716e+08	5.02297e+08	4.16786e+08	5.8639e+08	5.50034e+08	3.53808e+08	4.16956e+08	3.7782e+08	4.10723e+08	3.69643e+08	4.41365e+08	4.87896e+08	5.28869e+08	4.64486e+08	4.39746e+08	3.78996e+08	3.95175e+08	3.91913e+08	4.08119e+08
740	MAC_01642	7.64511	82538100	90366700	250865000	87042200	98498000	187457000	128320000	185743000	212273000	101653000	90896300	248735000	104262000	78175300	170165000	75208200	90958700	179905000	3	6	1.09048e+08	1.12168e+08	1.52975e+08	1.14998e+08	1.22261e+08	1.14309e+08	1.69534e+08	2.30553e+08	1.29442e+08	1.34302e+08	1.12825e+08	1.51676e+08	1.37749e+08	9.7035e+07	1.03765e+08	9.93636e+07	1.12902e+08	1.09704e+08	1.26674e+08	1.18859e+08	1.30574e+08	1.22405e+08	1.23447e+08	1.19797e+08	1.36096e+08	1.28805e+08	1.25566e+08
741	MAC_01643	6.7869	31864500	34561400	18848600	35853800	40136200	15818500	52715400	75636700	18060000	41723200	35323000	19521300	42684900	32843300	13970500	29526200	35429800	14874800	3	7	2.45858e+07	2.53291e+07	3.3333e+07	2.76638e+07	2.94147e+07	2.79743e+07	4.06738e+07	5.5432e+07	3.19383e+07	3.21925e+07	2.58872e+07	3.45226e+07	3.29345e+07	2.40699e+07	2.47062e+07	2.27816e+07	2.59655e+07	2.63055e+07	2.85599e+07	2.68402e+07	2.8452e+07	2.94455e+07	2.97002e+07	2.93175e+07	3.26516e+07	3.09686e+07	3.0982e+07
742	MAC_01644	7.04921	78685500	99663100	74799700	88061800	108982000	63910600	123345000	207566000	71776800	101769000	103285000	75049300	103820000	87528700	55962900	78736700	104950000	57969700	3	15	7.42684e+07	7.82926e+07	1.0088e+08	8.31183e+07	8.56132e+07	8.61941e+07	1.16421e+08	1.63058e+08	9.6803e+07	9.6056e+07	8.11378e+07	1.01216e+08	9.79919e+07	6.87601e+07	7.54753e+07	7.43167e+07	8.24458e+07	7.81818e+07	8.62732e+07	8.29633e+07	8.61079e+07	8.84714e+07	8.64443e+07	9.03325e+07	9.34589e+07	9.10968e+07	9.39045e+07
743	MAC_01645	6.86971	36520100	55075800	60954700	39775100	59317700	54313200	48786100	100860000	45334500	44399200	53904400	55646500	49700800	51117200	41096000	34092100	54747200	43667700	3	10	4.37862e+07	4.55164e+07	6.15169e+07	4.76888e+07	4.90221e+07	5.48141e+07	5.84926e+07	8.3354e+07	4.57526e+07	5.32329e+07	4.45484e+07	5.61597e+07	5.95893e+07	4.22449e+07	4.1475e+07	4.08751e+07	4.52449e+07	4.40705e+07	5.08639e+07	4.82318e+07	5.25089e+07	5.07601e+07	4.94979e+07	5.74459e+07	4.6956e+07	4.6568e+07	4.43827e+07
744	MAC_01646	6.58793	25616500	4215990	8537150	26314900	4808880	6706590	35828600	7321310	6846490	28420100	4421250	7832130	34104500	4088410	5398990	24093900	4338710	6501990	3	2	8.74232e+06	8.68741e+06	1.21399e+07	8.98067e+06	9.90911e+06	9.53684e+06	1.22275e+07	1.50862e+07	9.73577e+06	9.69912e+06	9.11036e+06	1.11374e+07	1.16391e+07	8.42452e+06	7.67742e+06	8.22269e+06	8.94028e+06	9.24589e+06	1.01554e+07	9.20568e+06	1.03623e+07	9.55905e+06	1.00053e+07	9.99472e+06	9.81582e+06	8.42831e+06	9.44427e+06
745	MAC_01647	8.00783	73641000	158422000	321778000	86326900	166812000	216400000	101957000	237556000	247246000	89185000	143831000	280634000	100452000	126180000	197175000	69529200	147374000	199392000	3	6	1.27508e+08	1.47368e+08	1.99779e+08	1.49473e+08	1.55173e+08	1.34354e+08	1.76537e+08	2.20981e+08	1.53505e+08	1.54422e+08	1.33795e+08	1.74234e+08	1.73931e+08	1.17376e+08	1.22418e+08	1.20388e+08	1.37091e+08	1.23795e+08	1.48119e+08	1.5616e+08	1.70525e+08	1.591e+08	1.56679e+08	1.40805e+08	1.41718e+08	1.23457e+08	1.48909e+08
746	MAC_01648	7.6618	138476000	273929000	344813000	174582000	320842000	314469000	215707000	520911000	320752000	200885000	260840000	360697000	215201000	232715000	269217000	137507000	244133000	294537000	3	20	1.99303e+08	2.35732e+08	2.78396e+08	2.51269e+08	2.76103e+08	2.53897e+08	3.10459e+08	4.48274e+08	2.5897e+08	2.89126e+08	2.24468e+08	2.91221e+08	3.09731e+08	2.00265e+08	2.17361e+08	1.97909e+08	2.1009e+08	2.37804e+08	2.31519e+08	2.49795e+08	2.37631e+08	2.67452e+08	2.78783e+08	2.66087e+08	2.49227e+08	2.5044e+08	2.51216e+08
747	MAC_01649	7.20796	67749000	120659000	153906000	82194500	150572000	130526000	115102000	306321000	157089000	91891600	135385000	148595000	96316900	124591000	109981000	68876400	136909000	109141000	3	17	9.54001e+07	9.49198e+07	1.38935e+08	1.15741e+08	1.18452e+08	1.1783e+08	1.6208e+08	2.40976e+08	1.41809e+08	1.29396e+08	1.06504e+08	1.34141e+08	1.35628e+08	9.8013e+07	9.9283e+07	9.69876e+07	1.07703e+08	9.85247e+07	1.10821e+08	1.00582e+08	1.18591e+08	1.23196e+08	1.19601e+08	1.23487e+08	1.30112e+08	1.34628e+08	1.37563e+08
748	MAC_01650	8.50003	236381000	274836000	786803000	265356000	362054000	774711000	349446000	631858000	930603000	332662000	295394000	866196000	344158000	255639000	642531000	207104000	235349000	696206000	3	8	3.45131e+08	3.53215e+08	4.19304e+08	3.87436e+08	4.65306e+08	4.1286e+08	5.10213e+08	8.12054e+08	4.95939e+08	4.85707e+08	3.79636e+08	4.61615e+08	5.02492e+08	3.28543e+08	3.42419e+08	3.02385e+08	3.02467e+08	3.71023e+08	4.00918e+08	3.74287e+08	3.57905e+08	4.12389e+08	4.69823e+08	4.32683e+08	4.09582e+08	4.53676e+08	4.81089e+08
749	MAC_01651	8.90548	471769000	609800000	838521000	447016000	566786000	644807000	500415000	872163000	685487000	537659000	507679000	932446000	647872000	466958000	611572000	419638000	478614000	645693000	3	11	5.56596e+08	6.30034e+08	6.87902e+08	5.27392e+08	5.85593e+08	5.28984e+08	5.90393e+08	9.01103e+08	5.62357e+08	6.34333e+08	5.24525e+08	7.64956e+08	7.64363e+08	4.82452e+08	5.01719e+08	4.95091e+08	4.94495e+08	5.29711e+08	6.46565e+08	6.6762e+08	5.87172e+08	5.61358e+08	5.91277e+08	5.54382e+08	4.73948e+08	5.03425e+08	5.45519e+08
750	MAC_01653	7.00264	19665900	25795500	80455100	23861800	22905100	57302300	25051500	32783700	63831000	26621200	25163500	101767000	30859000	22817800	77558000	18831000	22225400	57358100	3	2	2.88588e+07	3.5966e+07	3.93226e+07	3.5016e+07	3.1936e+07	2.80066e+07	3.67619e+07	4.57094e+07	3.11975e+07	3.90653e+07	3.50848e+07	4.97388e+07	4.52841e+07	3.18142e+07	3.79066e+07	2.76336e+07	3.09883e+07	2.80339e+07	3.35235e+07	3.81116e+07	3.35645e+07	3.72712e+07	3.2246e+07	2.93513e+07	2.95112e+07	2.55368e+07	3.02634e+07
751	MAC_01654	8.19862	358076000	671858000	961838000	385135000	756502000	825469000	474066000	1129670000	850353000	462872000	574331000	919723000	471062000	501621000	660517000	311497000	571742000	800309000	3	21	5.39007e+08	6.0744e+08	7.06736e+08	5.79738e+08	6.83968e+08	6.06535e+08	7.13605e+08	1.02136e+09	6.24819e+08	6.96754e+08	5.19264e+08	6.75791e+08	7.09083e+08	4.53525e+08	4.85332e+08	4.68892e+08	5.16923e+08	5.88048e+08	6.26132e+08	6.43678e+08	6.03248e+08	6.17075e+08	6.90607e+08	6.35657e+08	5.72859e+08	5.70609e+08	6.06111e+08
752	MAC_01655	7.67734	125962000	121587000	256668000	127717000	135540000	217576000	158468000	244543000	231492000	154664000	114412000	245572000	153863000	102438000	176116000	110079000	115563000	203604000	3	13	1.45813e+08	1.45561e+08	1.85207e+08	1.47845e+08	1.62265e+08	1.56999e+08	1.83442e+08	2.9276e+08	1.67041e+08	1.79038e+08	1.36971e+08	1.77201e+08	1.78111e+08	1.22636e+08	1.27082e+08	1.27427e+08	1.38349e+08	1.46917e+08	1.69383e+08	1.54244e+08	1.58087e+08	1.57366e+08	1.6384e+08	1.64537e+08	1.47261e+08	1.63558e+08	1.62039e+08
753	MAC_01657	6.85356	27723600	41481100	44354800	33967100	55843800	37664800	51495300	113973000	37640600	37951700	50143400	42566200	40807200	45848900	36670400	26663700	48232800	33565200	3	4	3.30813e+07	3.16537e+07	4.87117e+07	4.05313e+07	4.26137e+07	4.13646e+07	6.14469e+07	8.69714e+07	4.1338e+07	4.5286e+07	3.82638e+07	4.67474e+07	4.86933e+07	3.49867e+07	4.02725e+07	3.18165e+07	3.68059e+07	3.68623e+07	3.84286e+07	3.35421e+07	4.15788e+07	4.31417e+07	4.30274e+07	4.33506e+07	4.93276e+07	4.85889e+07	4.01003e+07
754	MAC_01658	7.60616	127475000	219049000	296365000	141254000	237549000	224751000	203392000	452650000	267469000	168675000	211334000	254214000	178097000	190393000	181276000	107625000	192256000	183542000	3	7	1.70904e+08	1.86211e+08	2.60038e+08	1.89377e+08	2.01937e+08	1.97202e+08	2.72684e+08	3.84792e+08	2.34684e+08	2.2614e+08	1.79652e+08	2.23054e+08	2.38772e+08	1.61851e+08	1.59056e+08	1.44291e+08	1.63434e+08	1.61044e+08	1.98529e+08	1.9732e+08	2.21961e+08	2.01574e+08	2.03898e+08	2.0667e+08	2.18902e+08	2.14974e+08	2.27657e+08
755	MAC_01659	7.11799	35594800	32393100	58063200	40628500	38246100	55566000	60693000	71323600	65289900	50523700	32138700	61145000	52026400	30118600	43551000	29049200	30443500	47829800	3	3	3.64791e+07	3.88633e+07	4.72234e+07	4.16378e+07	4.58853e+07	4.51924e+07	6.22007e+07	8.55697e+07	5.31009e+07	5.17788e+07	3.85581e+07	4.97299e+07	5.33189e+07	3.61345e+07	3.54205e+07	2.97708e+07	3.65243e+07	3.89005e+07	4.23756e+07	4.11817e+07	4.03084e+07	4.43194e+07	4.63307e+07	4.73622e+07	4.99328e+07	4.78058e+07	5.1511e+07
756	MAC_01660	7.26205	54220300	78950700	83142100	59268100	81318500	64992300	90845800	172062000	77105400	71889300	76142200	88087700	74272900	59818800	62333900	52512500	65950100	61150100	3	7	6.03758e+07	6.9622e+07	8.46699e+07	6.59967e+07	7.171e+07	6.61866e+07	1.01159e+08	1.51731e+08	7.85223e+07	8.00508e+07	6.71454e+07	8.97064e+07	8.2705e+07	5.27507e+07	6.34793e+07	5.84742e+07	5.81576e+07	6.22738e+07	7.01351e+07	7.37755e+07	7.22716e+07	7.02471e+07	7.24061e+07	6.93644e+07	8.12075e+07	8.47689e+07	7.61712e+07
757	MAC_01661	6.63056	11469500	29969100	NA	12480400	27020900	NA	15623400	43831000	NA	15182900	23981600	NA	15768000	21966800	NA	11365300	26690600	NA	2	5	2.39071e+07	29969100	NA	2.60143e+07	27020900	NA	3.25656e+07	43831000	NA	3.16474e+07	23981600	NA	3.2867e+07	21966800	NA	2.36899e+07	26690600	NA	2.77715e+07	3.1757e+07	NA	2.76897e+07	2.72832e+07	NA	2.61426e+07	2.44874e+07	NA
758	MAC_01662	6.87652	12454900	19156500	34154800	11046200	20008900	23641600	13165200	30303700	23886800	14598800	19696400	32501300	14999800	15995000	24011600	9715850	18012100	23119900	3	3	1.87283e+07	1.79455e+07	2.42468e+07	1.661e+07	1.8744e+07	1.67834e+07	1.97963e+07	2.8388e+07	1.69574e+07	2.1952e+07	1.84513e+07	2.3073e+07	2.2555e+07	1.49839e+07	1.7046e+07	1.46096e+07	1.68735e+07	1.6413e+07	2.17555e+07	1.90161e+07	2.06963e+07	1.76798e+07	1.8926e+07	1.75892e+07	1.58919e+07	1.58597e+07	1.64497e+07
759	MAC_01663	7.90672	89131400	228224000	397679000	104306000	290694000	344586000	146261000	515225000	404232000	120437000	229501000	387842000	127444000	214691000	283205000	86970900	228057000	311113000	3	10	1.76565e+08	1.85204e+08	2.47384e+08	2.06625e+08	2.35898e+08	2.14356e+08	2.89736e+08	4.18105e+08	2.5146e+08	2.3858e+08	1.8624e+08	2.41264e+08	2.5246e+08	1.74222e+08	1.76173e+08	1.72285e+08	1.85068e+08	1.93534e+08	2.05105e+08	1.96252e+08	2.11159e+08	2.19932e+08	2.38188e+08	2.24648e+08	2.32591e+08	2.33585e+08	2.43931e+08
760	MAC_01665	7.83588	51718200	100316000	193563000	64770700	116732000	184868000	89492400	221899000	209559000	69016100	99032200	210923000	74191600	83016300	150610000	54313000	96293800	170949000	3	5	8.71703e+07	9.9096e+07	1.16255e+08	1.0917e+08	1.15312e+08	1.11033e+08	1.50838e+08	2.192e+08	1.25862e+08	1.16326e+08	9.78278e+07	1.26681e+08	1.25049e+08	8.20067e+07	9.04571e+07	9.15438e+07	9.51227e+07	1.02673e+08	1.01261e+08	1.05008e+08	9.92316e+07	1.16201e+08	1.16432e+08	1.16364e+08	1.21088e+08	1.22462e+08	1.22094e+08
761	MAC_01668	7.3896	65906700	113029000	69216500	75651100	125323000	56919700	92470900	236447000	64601500	83307400	115830000	70317800	90899600	105404000	50275000	61789100	113919000	51389400	3	6	7.17625e+07	7.37515e+07	9.74229e+07	8.23726e+07	8.17733e+07	8.0115e+07	1.00687e+08	1.54282e+08	9.09272e+07	9.07092e+07	7.55791e+07	9.8973e+07	9.8976e+07	6.87762e+07	7.07625e+07	6.7279e+07	7.43322e+07	7.23311e+07	8.33623e+07	7.81513e+07	8.31572e+07	8.76777e+07	8.25671e+07	8.39615e+07	8.08282e+07	8.61937e+07	8.82047e+07
762	MAC_01669	8.38901	780937000	648434000	792983000	878891000	765467000	749095000	1130820000	1282050000	879578000	1061810000	697459000	839584000	1132460000	608485000	627188000	703956000	574639000	685480000	3	12	6.72491e+08	7.10209e+08	8.40761e+08	7.56843e+08	8.38392e+08	7.94229e+08	9.73788e+08	1.40419e+09	9.32574e+08	9.14361e+08	7.63905e+08	8.9017e+08	9.752e+08	6.66454e+08	6.64977e+08	6.062e+08	6.29384e+08	7.26781e+08	7.81194e+08	7.52579e+08	7.17648e+08	8.05586e+08	8.4653e+08	8.32362e+08	7.81725e+08	7.84488e+08	9.0465e+08
763	MAC_01671	6.69986	20053300	9721650	48816100	21769500	13331000	44383200	34102400	28417400	53373600	24847700	12985700	48460800	26731300	11932300	37880400	16684100	11266400	36771100	3	3	2.07467e+07	1.72735e+07	2.65559e+07	2.25222e+07	2.36866e+07	2.41444e+07	3.52815e+07	5.04922e+07	2.90351e+07	2.57068e+07	2.30731e+07	2.63626e+07	2.76556e+07	2.12014e+07	2.06069e+07	1.7261e+07	2.00182e+07	2.00034e+07	2.41002e+07	1.8304e+07	2.26673e+07	2.39727e+07	2.39165e+07	2.53036e+07	2.83229e+07	2.82089e+07	2.81658e+07
764	MAC_01673	6.8592	20080700	23458700	34947200	24204600	24016400	30649900	32392500	46394400	31150400	26678100	19707100	39238600	26781400	18287700	27883800	18879300	18035600	29264700	3	6	2.16957e+07	2.63057e+07	2.8845e+07	2.61513e+07	2.69311e+07	2.52981e+07	3.49977e+07	5.2025e+07	2.57112e+07	2.88237e+07	2.20988e+07	3.23871e+07	2.89353e+07	2.05071e+07	2.3015e+07	2.03977e+07	2.02245e+07	2.41548e+07	2.52027e+07	2.7875e+07	2.46212e+07	2.78355e+07	2.71925e+07	2.65127e+07	2.8095e+07	2.90651e+07	2.49414e+07
765	MAC_01674	7.28057	12605000	59725800	89933600	14584300	52065500	69785500	18050900	96245200	80008200	15182300	49820900	99930300	17332600	42867600	77429300	12925300	45759700	73451700	3	5	3.426e+07	4.38008e+07	4.51188e+07	3.96397e+07	3.8183e+07	3.50107e+07	4.90618e+07	7.05829e+07	4.01393e+07	4.1265e+07	3.65369e+07	5.0134e+07	4.71095e+07	3.14376e+07	3.88455e+07	3.51306e+07	3.35586e+07	3.685e+07	3.97979e+07	4.64139e+07	3.8512e+07	4.21926e+07	3.85537e+07	3.66916e+07	3.93852e+07	3.9433e+07	3.89374e+07
766	MAC_01675	8.11376	401764000	711191000	907218000	434873000	699212000	775367000	571107000	1289590000	809092000	517661000	613811000	932250000	509062000	533681000	653247000	352319000	591490000	732364000	3	35	5.57809e+08	6.40594e+08	7.25439e+08	6.03777e+08	6.29804e+08	6.20007e+08	7.92924e+08	1.16158e+09	6.46974e+08	7.1872e+08	5.5288e+08	7.45455e+08	7.06781e+08	4.80704e+08	5.22356e+08	4.89159e+08	5.32775e+08	5.8562e+08	6.47974e+08	6.7881e+08	6.19212e+08	6.42663e+08	6.35917e+08	6.49775e+08	6.36534e+08	6.48946e+08	6.27603e+08
767	MAC_01676	7.09549	77257200	146555000	165239000	82630700	136871000	133375000	103775000	263365000	132857000	95034700	130437000	160753000	98791900	113889000	125115000	70195800	130540000	125189000	3	15	1.07713e+08	1.20761e+08	1.43832e+08	1.15205e+08	1.12782e+08	1.16096e+08	1.44684e+08	2.17013e+08	1.15645e+08	1.32499e+08	1.0748e+08	1.39927e+08	1.37737e+08	9.38447e+07	1.08906e+08	9.78679e+07	1.07565e+08	1.08971e+08	1.25124e+08	1.27966e+08	1.22771e+08	1.22624e+08	1.13877e+08	1.2167e+08	1.16148e+08	1.2124e+08	1.12182e+08
768	MAC_01677	7.42335	NA	84933400	76259700	NA	73958800	45142700	NA	139942000	55246200	NA	78985200	63432300	NA	78688800	46814600	NA	81955000	54454300	2	2	NA	84933400	1.19166e+08	NA	73958800	7.05415e+07	NA	139942000	8.63295e+07	NA	7.89852e+07	9.91214e+07	NA	78688800	7.3154e+07	NA	81955000	8.50921e+07	NA	9.00003e+07	1.01716e+08	NA	7.46767e+07	7.39283e+07	NA	7.81824e+07	8.37446e+07
769	MAC_01678	7.25325	101184000	173518000	83916200	97093600	161511000	66496500	114830000	278098000	74126800	105158000	144333000	72491500	118553000	138746000	56306800	75854100	149977000	59236400	3	11	1.05321e+08	1.07945e+08	1.29595e+08	1.01063e+08	1.00475e+08	1.02693e+08	1.19524e+08	1.73004e+08	1.14476e+08	1.09457e+08	8.9789e+07	1.11951e+08	1.234e+08	8.63134e+07	8.69564e+07	7.89552e+07	9.33001e+07	9.14807e+07	1.22345e+08	1.14385e+08	1.10618e+08	1.07572e+08	1.01451e+08	1.07623e+08	9.59504e+07	9.66532e+07	1.11049e+08
770	MAC_01680	6.78764	11244900	44455600	16986900	12510800	48446100	10651200	15065100	69291100	10048700	13439000	40087000	12546600	14099700	38885000	10289000	13999800	49932600	10984400	3	4	1.64557e+07	1.82292e+07	2.83081e+07	1.83082e+07	1.98655e+07	1.77499e+07	2.20462e+07	2.84131e+07	1.67458e+07	1.96666e+07	1.64378e+07	2.09085e+07	2.06334e+07	1.5945e+07	1.71463e+07	2.04872e+07	2.04751e+07	1.83052e+07	1.91157e+07	1.93167e+07	2.4163e+07	1.94874e+07	2.00584e+07	1.86021e+07	1.7698e+07	1.58738e+07	1.62444e+07
771	MAC_01681	8.59992	571135000	1180930000	1586690000	615804000	1098670000	1200620000	921382000	2181350000	1357460000	746283000	940571000	1550900000	763461000	807969000	1131900000	492622000	899545000	1203740000	3	29	8.49813e+08	1.05562e+09	1.19295e+09	9.16278e+08	9.82091e+08	9.02685e+08	1.37096e+09	1.94989e+09	1.02061e+09	1.11042e+09	8.40768e+08	1.16604e+09	1.13598e+09	7.22236e+08	8.51018e+08	7.32991e+08	8.04095e+08	9.05031e+08	9.87178e+08	1.1186e+09	1.01827e+09	9.7529e+08	9.91624e+08	9.46025e+08	1.10056e+09	1.08936e+09	9.90046e+08
772	MAC_01684	7.8787	168972000	275347000	430549000	173097000	235927000	238282000	173641000	323155000	217903000	199281000	219507000	306223000	220716000	208439000	243533000	161760000	251234000	241397000	3	12	2.14676e+08	2.54922e+08	3.66039e+08	2.19916e+08	2.18426e+08	2.0258e+08	2.20608e+08	2.99184e+08	1.85254e+08	2.53183e+08	2.03224e+08	2.60341e+08	2.80415e+08	1.92977e+08	2.07044e+08	2.05513e+08	2.32598e+08	2.05228e+08	2.49376e+08	2.7013e+08	3.1244e+08	2.3408e+08	2.20546e+08	2.12306e+08	1.77097e+08	1.67147e+08	1.79707e+08
773	MAC_01685	6.60441	19841400	45691500	21094600	21568000	47695300	16783900	34206400	106852000	20725600	25136800	47174700	22432400	26661100	42565800	17374100	17626500	43780400	16971500	3	4	2.41047e+07	2.50504e+07	3.16711e+07	2.62023e+07	2.6149e+07	2.51991e+07	4.15563e+07	5.85817e+07	3.11171e+07	3.05379e+07	2.58636e+07	3.36796e+07	3.23897e+07	2.33367e+07	2.60852e+07	2.14139e+07	2.40026e+07	2.54807e+07	2.8001e+07	2.65448e+07	2.70335e+07	2.78898e+07	2.64028e+07	2.64089e+07	3.336e+07	3.27282e+07	3.01854e+07
774	MAC_01686	7.40954	66355000	91407900	83685400	65220800	55100400	56071500	87154600	128874000	62788200	71264400	54048100	68578500	71597600	46591700	55295000	53527500	58029800	51877600	3	8	6.39743e+07	8.93493e+07	8.87995e+07	6.28808e+07	5.38595e+07	5.94981e+07	8.40276e+07	1.25972e+08	6.66253e+07	6.87075e+07	5.28309e+07	7.27694e+07	6.90288e+07	4.55424e+07	5.86741e+07	5.1607e+07	5.67229e+07	5.50479e+07	7.43152e+07	9.46797e+07	7.57965e+07	6.69305e+07	5.43823e+07	6.23547e+07	6.74547e+07	7.03775e+07	6.46304e+07
775	MAC_01688	8.10953	574769000	712391000	1135450000	559203000	594448000	784760000	613113000	1049890000	821117000	568672000	603162000	835125000	719798000	619028000	655605000	555951000	656454000	723312000	3	34	6.69783e+08	7.15962e+08	9.69518e+08	6.51643e+08	5.97428e+08	6.70077e+08	7.14465e+08	1.05515e+09	7.01121e+08	6.62678e+08	6.06186e+08	7.13082e+08	8.38786e+08	6.22131e+08	5.59796e+08	6.47854e+08	6.59745e+08	6.17609e+08	7.78047e+08	7.58675e+08	8.2755e+08	6.93612e+08	6.03227e+08	7.02249e+08	5.7355e+08	5.8949e+08	6.80128e+08
776	MAC_01689	7.05204	49665900	99617200	71453700	49312600	98674300	55941700	64774700	159210000	56164600	62379800	85858400	70115900	63624900	74425000	51864700	44900200	86995200	55300300	3	6	6.16635e+07	6.98678e+07	8.20563e+07	6.12249e+07	6.92065e+07	6.42426e+07	8.04221e+07	1.11664e+08	6.44985e+07	7.74487e+07	6.02179e+07	8.052e+07	7.89946e+07	5.21989e+07	5.95606e+07	5.57466e+07	6.10152e+07	6.3506e+07	7.16309e+07	7.40359e+07	7.00407e+07	6.5168e+07	6.98782e+07	6.7327e+07	6.45603e+07	6.23841e+07	6.25673e+07
777	MAC_01690	6.80055	29710900	27211400	8658650	33926700	24644100	6296370	38483200	42632100	6182580	35416900	25877200	7027230	39691100	24035100	4922380	31681800	26678600	5645390	3	3	1.57118e+07	1.7849e+07	2.49617e+07	1.79413e+07	1.6165e+07	1.81516e+07	2.03509e+07	2.79641e+07	1.78236e+07	1.87293e+07	1.69739e+07	2.02586e+07	2.09896e+07	1.57656e+07	1.41906e+07	1.67541e+07	1.74996e+07	1.62749e+07	1.82515e+07	1.89139e+07	2.13066e+07	1.90967e+07	1.6322e+07	1.90231e+07	1.6337e+07	1.56229e+07	1.72899e+07
778	MAC_01691	7.40556	18398100	69652900	40862600	16371400	73564300	28969300	18295000	97109800	28597300	18717500	63644900	31209400	23389000	52574900	23560500	16599900	65961600	31522900	3	5	3.3695e+07	3.40963e+07	4.55789e+07	2.99833e+07	3.6011e+07	3.23129e+07	3.35062e+07	4.7537e+07	3.1898e+07	3.428e+07	3.11553e+07	3.48116e+07	4.28356e+07	2.57364e+07	2.62798e+07	3.04017e+07	3.22894e+07	3.51613e+07	3.91416e+07	3.61305e+07	3.89048e+07	3.19143e+07	3.63606e+07	3.38643e+07	2.68977e+07	2.65578e+07	3.09429e+07
779	MAC_01692	8.23727	223965000	265399000	193336000	233243000	279119000	144479000	285516000	419618000	140304000	279285000	247759000	198902000	298312000	209324000	138752000	203942000	236876000	143126000	3	12	1.96167e+08	2.17103e+08	2.69837e+08	2.04293e+08	2.28326e+08	2.01648e+08	2.50078e+08	3.43258e+08	1.95821e+08	2.4462e+08	2.02673e+08	2.77605e+08	2.61286e+08	1.71232e+08	1.93654e+08	1.78629e+08	1.93771e+08	1.99759e+08	2.27875e+08	2.30055e+08	2.30324e+08	2.1745e+08	2.30543e+08	2.11329e+08	2.00754e+08	1.9177e+08	1.89957e+08
780	MAC_01694	7.03062	18550000	24533200	NA	22651500	27958900	NA	32848100	50936000	NA	23738700	24349600	NA	25224300	21556200	NA	18904800	23082200	NA	2	2	2.1902e+07	24533200	NA	2.67447e+07	27958900	NA	3.87838e+07	50936000	NA	2.80283e+07	24349600	NA	2.97824e+07	21556200	NA	2.23209e+07	23082200	NA	2.54423e+07	2.59968e+07	NA	2.84671e+07	2.82303e+07	NA	3.11344e+07	2.84568e+07	NA
781	MAC_01695	6.56623	33541600	48530600	14637900	37236200	55966100	14115700	50080100	98166400	14724000	42798400	51176000	15085900	44972100	47602600	10574300	35930200	53581200	12982000	3	5	2.61999e+07	2.67796e+07	3.39605e+07	2.90858e+07	3.08826e+07	3.2749e+07	3.91184e+07	5.4169e+07	3.41603e+07	3.34306e+07	2.82393e+07	3.49999e+07	3.51285e+07	2.62675e+07	2.45328e+07	2.80657e+07	2.95666e+07	3.01187e+07	3.04349e+07	2.83772e+07	2.89876e+07	3.09591e+07	3.11823e+07	3.43213e+07	3.1403e+07	3.0263e+07	3.31374e+07
782	MAC_01696	7.58844	116197000	196971000	418741000	149204000	182914000	256792000	168816000	356069000	263169000	170335000	185703000	308555000	159339000	173780000	247409000	110414000	208647000	243311000	3	20	1.6563e+08	1.91772e+08	3.0173e+08	2.12679e+08	1.78086e+08	1.85035e+08	2.40635e+08	3.4667e+08	1.8963e+08	2.428e+08	1.80801e+08	2.22334e+08	2.27126e+08	1.69193e+08	1.78274e+08	1.57387e+08	2.0314e+08	1.75321e+08	1.92403e+08	2.03212e+08	2.57547e+08	2.26377e+08	1.79814e+08	1.93919e+08	1.93174e+08	1.93677e+08	1.83952e+08
783	MAC_01698	6.61072	13104600	21595200	21283700	11942700	21086500	14646500	15077600	38157400	15787700	12589000	20114600	16906200	15914000	19937700	13016900	14363800	21231900	14018900	3	4	1.62624e+07	1.60355e+07	2.30974e+07	1.48205e+07	1.56577e+07	1.58946e+07	1.87108e+07	2.83337e+07	1.7133e+07	1.56225e+07	1.4936e+07	1.83469e+07	1.97488e+07	1.48047e+07	1.41261e+07	1.7825e+07	1.57657e+07	1.52135e+07	1.88911e+07	1.69921e+07	1.97152e+07	1.5775e+07	1.58097e+07	1.66577e+07	1.50204e+07	1.58294e+07	1.662e+07
784	MAC_01700	6.65187	11399600	16108100	11674400	13504000	17774500	9772870	15642800	28925000	9486430	13336900	13283500	11614300	14167200	12730400	8471840	10708000	15821200	9508230	3	5	1.13639e+07	1.24753e+07	1.51213e+07	1.34618e+07	1.37659e+07	1.26583e+07	1.55939e+07	2.24017e+07	1.22873e+07	1.32952e+07	1.02877e+07	1.50434e+07	1.41229e+07	9.85937e+06	1.09731e+07	1.06745e+07	1.22531e+07	1.23155e+07	1.32008e+07	1.32196e+07	1.2907e+07	1.43288e+07	1.38995e+07	1.32661e+07	1.25183e+07	1.25153e+07	1.19194e+07
785	MAC_01701	6.57784	10585300	34845100	32137300	10861100	37103200	25645200	10132200	44321200	27148500	13539900	34457000	28711400	14922200	32757900	21870100	9208320	37762300	23267700	3	4	2.06672e+07	2.10896e+07	2.71959e+07	2.12057e+07	2.24563e+07	2.1702e+07	1.97826e+07	2.6825e+07	2.29742e+07	2.64359e+07	2.08548e+07	2.42967e+07	2.91348e+07	1.98264e+07	1.85074e+07	1.79787e+07	2.28553e+07	1.96901e+07	2.40079e+07	2.23478e+07	2.32136e+07	2.25714e+07	2.26743e+07	2.2744e+07	1.58808e+07	1.49865e+07	2.22863e+07
786	MAC_01702	6.91622	28987700	35610800	62242100	32481500	41547700	54168300	45244800	78251500	61600500	37237700	35277700	62556800	39068800	32196200	46618700	27751100	37441800	48506700	3	7	3.59803e+07	3.7094e+07	4.81406e+07	4.03169e+07	4.32782e+07	4.1896e+07	5.6159e+07	8.15107e+07	4.76444e+07	4.62204e+07	3.6747e+07	4.8384e+07	4.84932e+07	3.35372e+07	3.60568e+07	3.44454e+07	3.90013e+07	3.75171e+07	4.17962e+07	3.93069e+07	4.10914e+07	4.29134e+07	4.36983e+07	4.39075e+07	4.50826e+07	4.55382e+07	4.62178e+07
787	MAC_01706	6.60478	23705000	23748500	24421200	27822500	25909400	22192600	36496300	43685500	25411700	32392900	22350900	27088000	35826700	19500500	19283600	24191700	20731700	19903500	3	5	2.05453e+07	2.44104e+07	2.7413e+07	2.41139e+07	2.66315e+07	2.49114e+07	3.16316e+07	4.49031e+07	2.85248e+07	2.80751e+07	2.29739e+07	3.04065e+07	3.10512e+07	2.0044e+07	2.1646e+07	2.09671e+07	2.13095e+07	2.23418e+07	2.38662e+07	2.58667e+07	2.33989e+07	2.5667e+07	2.689e+07	2.61074e+07	2.53928e+07	2.50863e+07	2.76707e+07
788	MAC_01707	6.95996	44514300	71627700	110653000	47628100	75624400	81865900	64207800	127621000	83974600	57152400	65713800	103619000	59187000	64722900	72955400	41682600	63720400	82083600	3	11	6.03584e+07	6.64361e+07	8.79836e+07	6.45806e+07	7.01431e+07	6.50941e+07	8.70615e+07	1.18371e+08	6.67707e+07	7.74949e+07	6.09509e+07	8.23906e+07	8.02537e+07	6.00318e+07	5.8009e+07	5.65188e+07	5.91019e+07	6.52672e+07	7.01149e+07	7.03995e+07	7.51001e+07	6.87398e+07	7.0824e+07	6.82194e+07	6.98902e+07	6.61312e+07	6.47715e+07
789	MAC_01725	6.48846	17604800	15279300	NA	16867800	16724200	NA	20294000	25007300	NA	21665100	14063600	NA	22922200	14485400	NA	15218500	14427500	NA	2	2	1.51884e+07	15279300	NA	1.45526e+07	16724200	NA	1.75085e+07	25007300	NA	1.86914e+07	14063600	NA	1.9776e+07	14485400	NA	1.31296e+07	14427500	NA	1.76435e+07	1.61908e+07	NA	1.54898e+07	1.68865e+07	NA	1.40553e+07	1.3971e+07	NA
790	MAC_01731	6.83691	23050000	49511600	13892000	24320500	47165300	12602200	32055000	91172000	10808400	27043100	46055000	14530700	28755200	41310600	9542680	22944700	45610300	11911900	3	5	2.23231e+07	2.43982e+07	2.91092e+07	2.35536e+07	2.3242e+07	2.64065e+07	3.10442e+07	4.49275e+07	2.26478e+07	2.61903e+07	2.26949e+07	3.04475e+07	2.78484e+07	2.03569e+07	1.99956e+07	2.22211e+07	2.24757e+07	2.49601e+07	2.59315e+07	2.58538e+07	2.48467e+07	2.50705e+07	2.34676e+07	2.76744e+07	2.49212e+07	2.51e+07	2.19697e+07
791	MAC_01735	6.75441	18474300	11422400	15747100	18592800	11688600	14633100	27418500	22104900	14278100	22156100	10010400	17687100	23745200	8812220	13044900	16887600	10083400	13856000	3	4	1.35834e+07	1.49544e+07	1.63587e+07	1.36705e+07	1.5303e+07	1.52014e+07	2.01597e+07	2.89402e+07	1.48326e+07	1.62904e+07	1.31058e+07	1.8374e+07	1.74588e+07	1.15371e+07	1.35515e+07	1.24167e+07	1.32014e+07	1.43941e+07	1.5779e+07	1.58466e+07	1.39633e+07	1.45509e+07	1.54515e+07	1.59313e+07	1.61835e+07	1.61682e+07	1.43885e+07
792	MAC_01737	7.0478	NA	11103100	67558800	NA	8457250	53629200	NA	12529700	49784800	NA	7278890	72577700	NA	7044260	57663000	NA	7294770	65061100	2	5	NA	11103100	9.7365e+06	NA	8457250	7.72898e+06	NA	12529700	7.17493e+06	NA	7.27889e+06	1.04598e+07	NA	7044260	8.31032e+06	NA	7294770	9.37653e+06	NA	1.17655e+07	8.31077e+06	NA	8.53934e+06	8.10006e+06	NA	7.00006e+06	6.9601e+06
793	MAC_01738	7.10061	13950400	27554700	50387900	18011900	34251800	49684900	30209400	75536100	62185400	20728200	29903800	64337400	23487300	26606400	45149300	13766100	26972700	38968700	3	5	2.33236e+07	2.61241e+07	3.17887e+07	3.0114e+07	3.24735e+07	3.13451e+07	5.05069e+07	7.16144e+07	3.92314e+07	3.46553e+07	2.83512e+07	4.05891e+07	3.92683e+07	2.5225e+07	2.84837e+07	2.30154e+07	2.55723e+07	2.45845e+07	2.70936e+07	2.76826e+07	2.71338e+07	3.20534e+07	3.27887e+07	3.28501e+07	4.05453e+07	4.00093e+07	3.80568e+07
794	MAC_01739	6.76384	NA	26810900	45676100	NA	39127700	37100600	NA	87660400	50983900	NA	37575800	47898200	NA	32669100	40285900	NA	31739900	32849600	2	4	NA	26810900	4.25579e+07	NA	39127700	3.45678e+07	NA	8.76604e+07	4.75033e+07	NA	37575800	4.46283e+07	NA	32669100	3.75356e+07	NA	31739900	3.0607e+07	NA	2.84104e+07	3.63261e+07	NA	3.95075e+07	3.62275e+07	NA	4.89738e+07	4.6081e+07
795	MAC_01744	6.31131	NA	9284750	8022070	NA	9388850	6850000	NA	18324400	5903490	NA	8049300	6394420	NA	7240850	5472170	NA	7948890	6650350	2	2	NA	9.28475e+06	1.17359e+07	NA	9388850	1.00212e+07	NA	18324400	8.63651e+06	NA	8049300	9.35471e+06	NA	7240850	8.00551e+06	NA	7.94889e+06	9.72912e+06	NA	9.83866e+06	1.00174e+07	NA	9.47998e+06	1.05023e+07	NA	1.02374e+07	8.37791e+06
796	MAC_01750	7.59045	130078000	357685000	204866000	152692000	307934000	172028000	202441000	570478000	182334000	173184000	266028000	222881000	159967000	215713000	169295000	122381000	255690000	171072000	3	10	1.74874e+08	2.38232e+08	2.28796e+08	2.05276e+08	2.05096e+08	1.92122e+08	2.72158e+08	3.7996e+08	2.03632e+08	2.32825e+08	1.77185e+08	2.48915e+08	2.15057e+08	1.43673e+08	1.8907e+08	1.64527e+08	1.70299e+08	1.91055e+08	2.03141e+08	2.52444e+08	1.95293e+08	2.18497e+08	2.07086e+08	2.01347e+08	2.1848e+08	2.12275e+08	1.97535e+08
797	MAC_01753	6.98687	20535700	49565400	61223200	23791000	56677400	56787400	29803900	117281000	71430400	27345000	45179300	62723100	29229500	39425500	51256100	17769400	39526000	54530400	3	4	3.59304e+07	3.94902e+07	4.3919e+07	4.1626e+07	4.51566e+07	4.0737e+07	5.21465e+07	9.34413e+07	5.12412e+07	4.78443e+07	3.59957e+07	4.4995e+07	5.11415e+07	3.14115e+07	3.6769e+07	3.10903e+07	3.14915e+07	3.91179e+07	4.17382e+07	4.18461e+07	3.74879e+07	4.43069e+07	4.55949e+07	4.26928e+07	4.18616e+07	5.22035e+07	4.9707e+07
[truncated: 3,055 more rows]
[truncated: 45 more columns]
